# Supplementary material for: LncRNAs specifically overexpressed in endocervical adenocarcinoma are associated with an unfavorable recurrence prognosis and the immune response
Source: PeerJ. 2021 Sep 21;9:e12116. doi: 10.7717/peerj.12116 (PMC8462375; doi:10.7717/peerj.12116)
Supplement: Supplemental Information 1 [file peerj-09-12116-s001.xlsx]

## Sheet: Fig.1
	number			Squamous		Adenocarcinoma
bidirectional_promoter_lncRNA	35		Processed_transcript	1.10797	0.264507	1.10288	0.248075
processed_transcript	519		Antisense	0.333521	0.015473	0.417664	0.019249
3prime_overlapping_ncRNA	32		LincRNAs	0.249099	0.015802	0.297556	0.018012
antisense	5394		snoRNAs	0.181127	0.038294	0.201593	0.033192
lincRNA	7176		snRNAs	0.066093	0.008216	0.104109	0.020634
snoRNA	940
snRNA	1873

## Sheet: Fig.2
lincRNAs	ENSG00000251615.3	ENSG00000206344.6	ENSG00000277287.1	ENSG00000230615.5	ENSG00000278107.1	ENSG00000261229.4	ENSG00000273723.1	ENSG00000263126.1	ENSG00000259673.4	ENSG00000237424.1	ENSG00000226380.6	ENSG00000272375.1	ENSG00000251432.5	ENSG00000273015.2	ENSG00000260804.3	ENSG00000250742.1	ENSG00000238142.1	ENSG00000221949.5	ENSG00000243819.4	ENSG00000272156.1	ENSG00000226791.5	ENSG00000269473.1	ENSG00000261512.2	ENSG00000273576.1	ENSG00000261824.5	ENSG00000260418.1	ENSG00000272800.1	ENSG00000234432.4	ENSG00000273821.1	ENSG00000188825.12	ENSG00000257556.1	ENSG00000272010.1	ENSG00000255284.1	ENSG00000245156.1	ENSG00000205791.3	ENSG00000273472.1	ENSG00000271737.1	ENSG00000253522.3	ENSG00000273344.1	ENSG00000281912.1	ENSG00000273437.1	ENSG00000272308.1	ENSG00000235072.2	ENSG00000263731.1	ENSG00000245522.2	ENSG00000272087.1	ENSG00000269893.5	ENSG00000272913.1	ENSG00000272994.1
TCGA-4J-AA1J-01	1.7865	-0.918547	-0.0188904	-3.44621	-0.912405	-2.31756	1.39123	-1.75641	0.141882	0.774557	-2.46251	-1.15772	-1.25161	0.779442	0.362572	0.341492	2.78093	-2.35938	-1.84365	-1.0407	-4.9769	-3.28042	-0.488296	3.46377	-1.08231	1.8823	-0.475205	-1.11596	-1.5694	-1.31055	1.05546	0.946796	1.22093	-1.04135	-1.46986	-2.80009	-1.90351	-4.10809	1.7533	-1.01686	0.610542	-1.62153	-3.17605	-0.744172	-2.56502	0.220385	5.16203	1.63746	-0.535499
TCGA-BI-A0VR-01	-0.125583	-0.899214	-2.51593	-4.28167	-1.19888	-2.77396	-1.14911	-1.41939	-0.180062	2.58154	-1.9838	-1.92224	-1.90065	-0.0213933	-0.209306	0.906891	2.62517	-3.77396	-3.14477	-1.60229	-2.35293	-4.2514	0.641444	2.43531	-1.34434	1.80262	-1.7941	-1.43785	-1.70387	-2.26717	-0.542057	-0.135209	0.810887	-2.76315	-2.37045	-1.33366	-1.55256	-0.915829	1.31211	-0.959633	0.795486	-1.6185	-1.95063	-0.0793264	-2.72864	1.56069	5.0869	0.802225	-1.67808
TCGA-BI-A0VS-01	-0.884228	-2.49735	-1.13019	-4.90842	-2.2017	-3.65125	-0.147706	-1.42094	-1.85228	1.30682	-3.25188	-2.4776	-1.59259	0.252627	-0.627163	-0.212856	1.4153	-1.34382	-1.15699	-1.02788	-3.91827	-1.7261	0.519959	0.800382	-3.75214	2.36177	0.2355	-1.41243	-2.31812	-1.85139	1.17822	1.31663	1.81605	-2.91346	-1.0107	-2.26753	-0.707383	-1.01971	0.769113	-0.831116	0.537925	-1.04833	-2.0779	0.0693439	-0.64841	-0.223487	4.06606	0.663373	-0.999169
TCGA-BI-A20A-01	1.85719	0.663106	-2.35259	-5.0276	-1.35629	-2.83183	1.14625	-2.61533	0.347718	1.57427	-3.75439	-1.21458	-2.00583	0.345133	0.250098	1.89298	3.34164	-1.76144	-1.88898	-0.840729	-1.75782	-2.56081	0.534947	3.3382	-3.43522	2.39111	-0.215481	-0.0102898	-0.820635	-0.510767	1.39246	1.06995	1.52179	-2.71553	-1.30967	-0.954469	0.188656	-0.355571	2.17697	0.0462211	0.687491	-1.28781	-1.23527	0.572758	-1.44819	1.18089	4.27501	2.53223	-0.354526
TCGA-C5-A0TN-01	-1.66186	-0.996676	-0.861961	-2.58553	-0.0449823	-3.0351	0.426967	-1.48251	-0.936568	0.726294	-2.09332	-2.88382	-2.42411	0.0559791	-1.21669	3.67067	3.87004	-1.22458	-1.74378	-1.15947	-2.3396	-3.55763	-0.900981	2.03504	-6.50886	1.39429	-0.344748	0.3438	0.182548	-2.87574	2.58383	1.60919	-0.31375	-3.19039	-1.13938	-2.08879	-0.44375	-3.71871	0.595186	-1.04252	-0.616754	-0.647192	-4.04971	-0.769834	-2.00572	-2.57081	3.83037	2.23296	-1.30263
TCGA-C5-A1BE-01	-0.631258	-1.85227	-0.466189	-4.01125	-0.6148	-3.11188	-0.974907	-2.32542	-0.793719	1.47175	-4.00935	-2.18616	-1.5338	0.139087	-1.19524	-0.404013	3.17623	-1.73922	-3.14565	-0.83265	-4.04187	-1.98925	-1.22569	1.8048	-4.81119	3.20891	-1.30022	-0.299325	-1.21933	-2.41847	-0.267305	0.0338336	0.864045	-2.81466	-1.40609	-0.470199	-1.17493	-1.95066	3.50888	0.284961	1.5868	-0.434957	-2.18855	0.249757	-1.62998	-0.659025	5.2073	1.2741	-1.00803
TCGA-C5-A1BF-01	-1.48736	-2.07982	-3.60534	-1.93503	-0.153844	-3.27325	-1.26274	-2.23886	-0.0569964	1.19238	-1.88595	-1.72109	-0.559715	-1.01918	0.0595947	1.47572	3.85664	-2.30977	-2.61852	-1.43414	-2.12523	-3.27819	-0.514635	2.37937	-0.591233	4.73106	-2.26096	-2.65334	-1.13276	-2.30055	1.53091	-0.671018	0.091962	-2.1779	-2.15352	-1.7785	-1.78881	-2.55598	1.26793	-1.97017	0.477809	-1.40729	-1.73942	0.0616955	-3.86535	0.591923	4.73033	1.35001	-0.536551
TCGA-C5-A1BI-01	-0.104608	-2.06733	-1.64161	-4.04963	-1.45712	-4.1102	0.418432	-1.49962	-1.12908	0.606204	-2.32004	-2.25848	-0.308446	0.323635	-0.355723	-1.71974	2.21527	-2.38774	-2.07891	-1.93853	-1.93244	-2.78029	-0.60685	1.43268	-3.09344	0.36908	-2.00481	-1.35905	-0.192114	-2.2504	0.121701	0.315146	0.781073	-2.20249	-2.01154	-2.25487	-1.8888	-0.227124	0.877635	-2.04062	-0.57638	-0.954741	-1.905	0.0548125	-1.30238	-0.019475	4.66466	0.310705	-1.33152
TCGA-C5-A1BJ-01	-0.319981	-1.35676	-1.64861	-3.92169	0.013539	-3.29851	-0.860687	-1.27018	-0.278226	0.515083	-3.50647	-1.24034	-0.661981	0.158082	0.0774609	-0.823588	1.96543	-0.954553	-1.56978	-1.08184	-2.29634	-2.67419	0.0340257	1.69198	-3.45033	2.3805	-0.385762	-0.655011	-0.142259	-2.06556	0.678516	0.88012	1.21959	-1.78542	-1.67487	-1.21469	-1.19258	0.279978	1.35244	-1.03029	0.412621	-0.396026	-2.50577	-0.115703	-1.2812	0.335706	5.24863	1.31568	-0.683391
TCGA-C5-A1BK-01	1.2464	-0.616461	-0.591274	-3.39581	0.314913	-2.83748	0.113285	-0.999485	-0.476336	1.26581	-3.41539	-1.05615	-1.11101	-0.161286	0.16141	-0.419432	1.44213	-2.57444	-3.36356	-0.275217	-0.994317	-1.90504	0.352786	2.97948	-3.44852	4.1429	-1.53944	-1.41724	-0.252812	-2.2264	-0.0960706	1.49217	0.281633	-2.68465	-2.63363	-1.58304	-1.74536	0.386948	1.77263	-1.35843	1.85247	-0.626873	-2.28093	0.436352	-3.23694	0.970558	4.11891	0.211463	-1.64713
TCGA-C5-A1BL-01	-1.37632	-0.110338	-0.734243	-2.61201	-0.862223	-3.03291	-0.684188	-2.01435	-0.322002	1.42385	-3.23787	-2.50312	-1.06069	0.174266	-1.82056	-1.31586	2.16328	-2.03291	-2.28508	-2.27063	-2.62186	-2.32132	0.323598	1.83078	-4.54319	0.342032	-1.13397	-1.51254	-0.0831165	-1.68609	1.59876	-0.28313	1.29462	-2.24782	-2.34364	-0.614982	-0.455369	-0.922975	2.64079	-0.88	0.944516	-0.135249	-2.99094	-0.132796	-0.309518	0.329261	4.94947	1.79646	0.136964
TCGA-C5-A1BM-01	-0.917647	-3.17523	-1.5975	-5.80243	-0.967456	-5.15921	-0.940117	-1.45992	-1.18653	1.26259	-2.02287	-1.38149	-1.93267	0.0921394	-0.872087	-0.160579	-0.963018	-1.54568	-3.16745	-1.11152	-1.47514	-5.11058	-4.93198	2.00721	-1.73089	1.7862	-1.56839	-1.12942	-1.06055	-3.83814	-1.36788	0.278632	0.225108	-2.69895	-4.88498	-1.88329	-1.67477	-2.21638	1.08775	-2.17806	-0.224847	-0.61518	-2.47338	0.0695328	-1.87685	0.647066	4.43004	0.131392	-1.19024
TCGA-C5-A1BN-01	-1.48644	-2.35414	-1.48448	-2.49869	-2.29553	-2.84508	-0.627933	-2.79558	-0.344176	0.8046	-3.14109	-1.54084	-2.50146	-0.109228	0.056615	-1.37284	3.44304	-2.58204	-2.87885	-1.1759	-6.94499	-4.30741	-0.456383	0.867241	-5.40689	1.56735	0.162135	0.638415	-0.952522	-2.68218	1.79184	-0.943288	-0.78669	-1.71135	-2.17491	-3.03121	-1.80121	-4.75424	0.86521	-1.89302	-0.711182	-1.64208	-2.55918	-0.0398333	-3.27007	-0.205808	5.15158	1.6726	-1.1523
TCGA-C5-A1BQ-01	0.21177	-1.84942	-2.28781	-4.01005	-0.399669	-2.77681	0.100295	-1.58036	-1.35814	-0.21895	-2.21659	-0.62553	0.284214	-0.348306	0.0986324	1.71078	3.29259	-1.78795	-2.07045	0.61819	-2.68538	-4.69165	-0.213848	2.57414	-4.44321	2.52705	-2.2844	-1.78205	-1.8222	-1.37837	2.76175	0.594462	0.466493	-2.652	-3.07373	-2.34507	-1.29238	-1.3519	0.462891	-1.19927	0.963464	-0.196257	-1.98407	1.2194	-1.67704	-0.242132	4.66801	1.54897	-1.63495
TCGA-C5-A1M5-01	2.03393	-0.148077	0.407868	-4.30273	-0.689423	-3.13205	0.98416	-1.51224	-0.319468	1.67187	-4.42807	-0.720906	0.000612072	1.13787	0.589816	2.17715	3.56775	-0.813166	-0.928789	-0.318488	-2.53153	-3.95053	-0.508896	3.33592	-0.804568	1.97225	-1.10467	0.315216	0.0824281	-0.698513	-0.20618	1.81643	1.68714	-2.7353	-1.29197	-0.0551582	-0.436114	1.1876	3.23804	1.0538	1.72066	-0.575426	-2.20873	0.590726	-2.09762	0.729606	5.50015	1.68216	-0.652448
TCGA-C5-A1M6-01	0.0938265	0.157503	-6.14619	-3.99677	-0.699854	-2.95301	-0.356353	-0.724224	-0.515324	2.7583	-2.90799	-0.364321	-1.83226	1.17347	-0.475063	1.11552	4.26703	-4.0119	-0.453099	0.26871	-4.71188	-0.366941	-0.244651	2.65003	0.209138	1.63606	0.222773	-1.09315	-1.35685	-1.30742	-0.290958	-1.05122	0.230688	-1.99282	-0.219342	-1.21315	-1.05353	-0.45075	1.81114	-0.770946	0.580817	-0.408979	-0.408536	1.75925	-2.28208	3.36228	3.92806	1.44809	0.20964
TCGA-C5-A1M7-01	-0.563202	-1.43311	-2.18451	-3.50902	-0.283604	-3.23525	-0.119035	-0.770715	-0.378496	1.5042	-2.05996	-1.8241	-1.22421	0.252757	0.394362	-0.763011	2.10533	-3.05022	-2.03198	-0.726538	-2.33516	-3.5683	1.13207	1.91544	-1.11694	3.73223	-1.33339	-2.46117	-3.56509	-2.5739	-0.454805	-0.259461	0.381133	-2.6161	-2.13213	-1.61403	-2.19139	0.0255069	1.78615	-1.42337	1.01412	-0.295292	-2.59572	0.847881	-3.75335	0.114512	5.45977	-0.78699	-1.00587
TCGA-C5-A1M8-01	0.758028	-3.40387	-2.55215	-3.5556	0.514805	-3.56842	1.5812	-0.771072	0.0507346	2.63583	-3.45927	-1.23128	-0.0170404	1.52271	-0.310745	3.04721	4.24835	0.349964	-0.0241207	0.302387	-3.74234	-1.08239	-2.92616	3.65718	-4.85631	4.08748	-1.16047	-7.66276	2.44278	-0.719844	0.354154	1.32129	2.12051	-4.5676	-0.972262	-2.21189	0.179048	-3.28856	2.72483	0.821531	2.59767	-0.872391	-0.511502	1.15019	-0.757564	-0.206248	5.31162	0.707751	-1.56667
TCGA-C5-A1MF-01	-1.97176	-3.50688	-2.56415	-2.28807	-0.79024	-4.95028	-0.109704	-1.52733	-0.700868	0.901697	-4.13588	-1.09856	-2.19828	-1.25208	-0.800666	1.57724	3.40073	-2.78036	-3.22156	-0.821677	-1.59282	-4.35733	-2.40113	1.94583	-4.02316	4.61548	-1.09001	-3.8158	-2.03219	-3.12443	1.12116	0.309055	2.1861	-3.3056	-2.35412	-2.8885	1.26207	-3.23301	1.49592	-3.33526	2.0945	0.500635	-0.753495	1.25913	-2.87942	7.01761	6.72091	-0.403844	-3.26944
TCGA-C5-A1MH-01	1.73888	-1.22841	-2.24629	-4.75865	-1.13981	-2.65599	-0.289346	-1.33258	-1.26955	1.51397	-3.48544	-1.1262	-1.77341	0.61694	-1.18061	-0.579686	3.09601	-2.17884	-2.2492	-1.63068	-1.26919	-3.1567	-0.064193	1.78069	0.150836	2.01056	-2.02454	-0.277843	-1.50729	-2.56253	1.41884	0.329857	0.630954	-3.56206	-0.821047	-0.605794	-0.815415	0.16819	1.86182	-0.645303	0.782409	-1.01886	-3.1286	-0.427253	-3.38946	0.52023	4.8088	-1.26156	-1.18044
TCGA-C5-A1MI-01	0.521584	-1.8957	0.241093	-4.20355	-2.10255	-3.30417	-0.389593	-1.33329	0.657422	0.504785	-4.35918	-2.70038	-2.09383	0.570665	0.826336	0.934967	2.43199	-0.862801	-0.8599	-2.561	-2.88052	-3.72211	-0.144962	1.57574	1.06475	1.85406	-1.74627	0.415272	0.950951	-1.77871	0.923729	0.0776071	0.0105528	-1.62448	-0.911546	-0.00488497	-0.113468	-0.92056	2.11161	-0.878187	-0.585317	-1.36422	-0.978748	0.403553	-2.08531	-0.755103	4.48649	1.80491	-0.541759
TCGA-C5-A1MK-01	0.265313	-3.64958	-4.05735	-4.62579	-1.10287	-3.1861	-1.03001	-1.6305	-0.224051	-0.693213	-3.20819	-4.24127	0.914916	0.706302	-0.419806	-1.15709	2.87799	-1.74249	-2.04233	-2.10188	-2.36001	-3.30739	-0.117564	1.48665	0.0193953	1.65352	-1.90013	-0.225149	-0.952505	-3.07448	-0.000485059	0.423511	0.743842	-2.54784	-1.54263	-1.65269	-1.14912	-1.2688	1.26975	-1.64789	0.458759	-1.49006	-3.55916	-0.0118022	-1.98465	-0.392205	3.9899	1.16081	-1.28503
TCGA-C5-A1ML-01	-0.906372	-0.140624	-1.65036	-6.31472	-1.08444	-4.53399	1.33633	-1.55304	-1.18329	2.20974	-1.85169	-1.09731	-2.17193	1.21484	-0.01514	1.84669	1.59294	-1.94903	-1.80527	-0.341254	-2.80101	-4.28896	0.224619	1.76067	-3.55242	2.80443	-0.521711	1.67088	-1.20087	-1.891	0.95778	0.0116513	1.21711	-2.7962	-1.03094	-0.706669	0.0379066	-1.9936	2.07357	-0.959614	-0.152171	0.0689297	-3.36274	0.09468	-3.1261	0.308809	4.62566	2.37	-0.577517
TCGA-C5-A1MN-01	-0.0952312	-2.94377	-0.481319	-3.27237	-2.44012	-4.69328	-1.95223	-2.67471	-1.11252	0.696952	-2.37298	-5.16349	-3.1892	-1.35063	-0.850638	-0.789806	2.94254	-1.43024	-2.80105	-3.0241	-6.86719	-3.52917	0.315311	0.451224	-6.46659	1.23748	-2.00292	-0.434467	0.777352	-2.80031	0.0131649	-0.943494	0.0519198	-4.27741	-1.89548	-1.02742	-0.830331	-1.44379	1.07997	-2.40019	-0.89642	-4.73421	-5.06634	-1.00997	-1.46435	-0.528549	4.30248	1.71611	-1.35347
TCGA-C5-A1MP-01	-0.139317	-1.79338	-1.54008	-3.55808	-1.0868	-4.77735	0.628011	-0.782857	-1.32061	1.46335	-3.52999	-0.925633	1.09741	0.532163	-0.0327888	0.346167	3.55839	-1.51432	-2.28309	-0.35329	-1.9289	-3.40679	-1.64323	3.30319	-2.87824	3.01037	-1.21253	-0.250553	0.462664	-1.48583	-0.583923	1.66359	1.62582	-2.9521	-1.78888	-1.71556	-0.833486	-0.55107	2.23951	-1.42537	1.82686	-0.326435	-1.24353	0.349345	-1.66902	0.820335	5.8011	1.39844	-1.61652
TCGA-C5-A1MQ-01	-0.325829	-2.62913	-3.19896	-2.48695	0.868863	-3.44318	-0.313098	-1.42934	0.17236	0.600798	-2.23799	-0.854498	-1.1783	-0.409671	-0.117716	0.400787	0.792535	-3.02815	-2.50587	0.641029	-1.29517	-2.15509	-1.10976	2.38836	0.141053	2.79306	-2.50772	-0.778187	0.674214	-1.38515	2.73719	-0.319004	2.34983	-3.87532	-1.43199	-1.28829	2.17511	-1.04169	2.22338	-0.261123	2.13795	-0.0101871	-3.24921	-0.442287	-2.46825	-1.96295	6.22093	0.441125	-1.05091
TCGA-C5-A2LT-01	-1.40334	-2.33534	-0.890451	-2.98457	-0.988165	-2.36823	-0.137705	-1.88572	-0.147131	0.473122	-0.992267	-2.56714	-2.04971	0.386397	-0.339628	2.78293	3.08892	-0.854653	-3.81941	-0.199484	-2.17131	-3.27069	1.42098	1.44569	0.167892	2.423	-1.59726	-0.0649289	-0.571157	-3.09223	2.6944	0.135007	1.97087	-3.0961	-1.98619	-3.16442	-0.571851	-0.536956	1.60047	-1.65183	0.378002	-0.945218	-3.16187	-0.970998	-1.15535	-0.0614827	5.29645	-0.39437	-1.93532
TCGA-C5-A2LV-01	-1.66876	-1.85874	-5.36167	-0.589318	-2.23726	-3.69686	-0.715422	-2.07818	-1.86316	0.770799	-2.63804	-2.54558	-2.93903	-1.8096	0.0682184	-1.58694	1.90741	-3.96434	-3.08362	-0.728128	-2.85697	-2.44178	-0.405203	1.63433	0.146794	1.4106	-0.706951	-2.06119	-1.25682	-3.83448	1.37458	0.674408	0.0610126	-5.65951	-2.80114	-3.33552	-1.21243	-2.92104	-0.679555	-3.63028	-1.01548	0.0129725	-2.71148	-0.579154	-4.25244	-1.85406	4.90677	-1.15042	-2.87693
TCGA-C5-A2LX-01	0.306417	-0.267923	-3.77199	-3.93385	-0.206072	-3.78115	0.300435	-1.96519	-0.241147	1.00454	-2.72574	0.518026	-1.52705	0.357845	1.78555	0.882936	1.77579	-1.27711	-2.51186	1.62826	-0.902745	-4.45499	-1.73723	2.89654	-3.0597	3.9786	-0.0691044	-0.361941	-1.3225	-2.17769	1.9083	2.07059	0.97262	-3.91783	-1.05946	-2.50072	0.453305	0.346102	1.44498	-0.151633	3.1337	1.43273	-1.45042	1.86581	-1.55967	-0.539802	6.24258	0.317083	-0.709639
TCGA-C5-A2LY-01	0.982777	-1.6398	-2.45064	-4.08258	0.224318	-3.45386	0.609115	-1.20083	-0.207358	1.2961	-3.1313	-2.45013	-1.01118	-0.453511	-0.701574	0.828688	4.53241	-1.55339	-2.51654	-0.706678	-1.30584	-2.88399	0.832266	3.23917	-4.69666	3.2996	-1.12607	-1.08331	-0.968727	-2.08172	0.589014	0.447931	1.82549	-2.49367	-4.02762	-1.18348	1.10858	0.323786	0.67893	-1.47825	2.15036	0.701606	-1.05043	-0.228087	-3.10041	-0.196018	5.30989	1.06221	-1.66731
TCGA-C5-A2LZ-01	0.402897	-2.37471	-0.475059	-4.03988	-1.7165	-2.46561	1.05535	-1.08013	-0.280138	1.55882	-4.50364	-0.559439	0.837876	0.601912	0.305499	1.73435	2.3877	-1.77373	-1.62997	-1.03744	-2.11114	-2.44971	0.0973561	2.60454	-4.08138	3.32992	0.0478684	-0.508002	0.0250606	-1.35747	0.0467488	2.11078	0.777697	-1.47406	-2.11045	-1.25626	-1.87426	-0.206702	2.06167	-0.939592	1.67521	0.20241	-1.24756	1.30922	-1.43622	1.18455	5.15945	1.37475	-0.375582
TCGA-C5-A3HD-01	-0.120602	-1.47884	-1.55473	-2.96671	-1.58818	-2.16326	1.75769	-1.38667	0.741508	2.41872	-3.67078	-0.404649	-0.931263	0.128743	0.136106	1.03734	3.69114	-4.09287	-2.669	-0.739196	-6.01524	-1.64974	-0.913662	2.27342	-5.12922	2.01388	-0.472906	-1.04692	-0.0227781	-0.828852	3.09218	1.16479	0.961814	-2.51858	-1.66021	-2.51651	-1.67882	-3.687	1.65685	0.00975588	0.440954	-0.127378	-3.47743	0.671442	-2.43344	0.138973	4.15727	0.337376	0.235438
TCGA-C5-A3HE-01	-1.05806	0.0993934	-3.00095	-5.40228	-0.461505	-2.56266	0.0263854	-1.05866	0.0461792	0.336519	-2.12907	-1.26733	-2.31012	-0.597435	-1.94142	4.45655	2.90257	-2.62155	-3.62979	-2.36741	-2.35806	-1.89735	0.590573	2.94442	-0.996833	3.21283	0.0887036	-2.48707	-3.28842	-3.45104	0.917017	1.28024	1.57373	-2.94516	-2.803	-3.00722	-1.26264	-1.86775	1.0962	-2.95406	0.634741	-1.22508	-3.03526	1.63912	-1.60222	2.41108	5.64486	1.05417	-0.762371
TCGA-C5-A3HL-01	-0.51142	-2.36847	-1.32585	-3.84777	-1.90289	-3.18252	-0.396386	-2.42699	-1.42496	-0.017521	-4.275	-1.91576	-1.29378	0.219019	0.905699	-1.94262	1.01367	-1.28205	-2.13829	-0.825287	-6.20443	-3.43756	-0.311433	1.40617	-1.18324	2.38357	-1.78762	-0.200039	-1.11243	-2.30419	-0.346099	-0.865694	0.738142	-2.75667	-1.8983	-0.442658	-1.69808	-2.58073	0.987502	-1.44792	-0.648694	-0.679132	-2.34469	0.00558115	-0.974923	0.812286	4.24903	0.216364	-1.85344
TCGA-C5-A7CG-01	2.16849	-1.19629	-0.724357	-5.42043	0.0728851	-2.87416	0.863845	-1.03617	-0.185233	0.924705	-0.891721	0.413654	-1.72963	1.09396	1.91818	3.34156	1.69399	-2.61113	-2.16251	-0.338256	-0.623788	-1.62144	0.27403	4.07497	0.459815	2.98924	-0.726954	-1.34172	-2.6285	-1.59735	0.545911	2.13983	1.36459	-2.63887	-1.19554	-0.698205	-1.47719	0.0209869	2.07522	-0.658552	2.44994	1.38546	-0.468446	1.56886	-2.74638	0.636061	6.14867	-0.327725	-0.33889
TCGA-C5-A7CH-01	-1.50017	-1.50477	-0.747561	-2.6969	-1.46211	-5.18919	-0.660555	-1.23572	-1.83036	1.36575	-2.60925	-2.33747	-2.10015	-0.520089	-0.090556	0.121099	1.55132	-2.1188	-2.78239	-1.93505	-4.62614	-1.83881	-0.903067	1.07757	-0.85398	2.20368	-1.42083	-0.502167	-0.981595	-1.7407	0.419278	0.0818307	1.93209	-1.78843	-2.00807	-3.22694	-0.967789	-1.00244	0.714115	-1.47108	0.270633	-0.586268	-2.50336	1.00462	-2.7813	-0.539034	4.4794	0.566703	-0.931849
TCGA-C5-A7CJ-01	1.50548	-1.38719	-1.21	-5.44141	-0.316922	-2.50867	-0.0831327	-1.27379	0.341357	1.6724	-2.63769	-0.978883	-0.726614	0.506928	0.789335	0.105291	3.15349	-1.52317	-3.25388	-1.35407	-2.22316	-3.13811	-0.374555	2.38744	-2.82256	3.05531	-1.02477	-0.388692	-1.03804	-2.56417	-0.759163	0.530616	1.02003	-1.02672	-2.534	-1.13655	-1.02424	-0.127272	1.83677	-1.17605	0.358573	-0.549609	-1.76626	0.12505	-1.51582	0.36975	4.95839	1.04675	-0.725264
TCGA-C5-A7CK-01	-0.610477	-0.5642	-0.000826559	-3.56085	-2.40891	-3.20639	-0.0927899	-1.64958	-0.855689	0.399836	-2.54399	-0.96235	-1.63622	0.906437	0.885745	-0.463139	1.52896	-3.62143	-2.34016	-1.14489	-4.25102	-2.92894	0.150124	1.70061	0.0944388	2.26448	-0.779069	-1.22391	-1.87326	-2.46907	1.17847	-0.260207	1.9907	-1.85389	-1.1508	-0.974674	-1.13699	-2.6046	1.16985	-1.43937	0.544667	0.322533	-1.48494	1.78907	-0.940513	0.940194	4.48475	0.616176	-0.0661158
TCGA-C5-A7CL-01	-1.03783	-1.45336	-3.01314	-2.16971	-1.73673	-2.80931	1.92109	-0.493996	-1.01933	1.91108	-2.25455	-0.0908569	0.286783	0.647208	-0.824323	0.702085	3.75474	-1.9333	-1.90501	-0.140135	-2.57883	-3.94125	0.237347	2.55486	-3.46063	3.25691	-0.0634622	-2.08422	-0.656756	-2.07092	1.41812	1.36257	1.76318	-1.43106	-2.71565	-2.45647	-0.604983	0.0148747	0.21464	-1.49748	1.35952	0.0280765	-1.44541	0.750758	-4.26649	-0.246618	3.62527	1.08429	0.394121
TCGA-C5-A7CO-01	-0.441302	-1.31591	-0.172979	-4.11036	-1.01758	-3.59267	1.10921	-1.43275	-0.18915	1.29931	-2.86753	-0.477911	-1.50363	1.08545	0.520427	0.451288	3.42115	-2.128	-3.70044	-1.54498	-3.59665	-3.27102	-1.55808	2.25905	-4.51798	2.73461	-1.56128	-0.816637	-2.25954	-2.17727	1.30779	0.894084	1.98335	-3.59184	-2.51108	-2.17473	0.154805	-0.343175	2.41613	-0.825643	1.55469	0.614327	-1.85026	2.00272	-1.28431	-0.371353	5.04854	1.40003	-0.1779
TCGA-C5-A7UC-01	-2.30351	-2.28224	-1.13027	-2.88344	-1.46052	-4.10272	-1.0106	-1.84969	-1.40859	1.19136	-0.855351	-2.05835	-2.31853	-0.818602	-0.17549	-5.1441	2.00037	-1.69284	-4.50327	-0.597039	-4.76206	-4.12447	0.353332	0.0291118	0.0715017	2.15417	-1.04979	-0.383271	-1.57694	-2.47653	1.21346	0.0361101	1.56617	-2.21808	-2.06598	-3.00029	-0.61828	-4.08589	1.77188	-2.37751	0.134715	-1.82172	-3.96121	0.756076	-1.56358	-0.897345	5.27011	0.625053	-1.47716
TCGA-C5-A7UE-01	-0.326941	-1.2816	-0.862567	-4.28077	-0.597384	-4.5875	-0.939569	-0.0125451	-1.07505	2.1531	-1.3671	-1.03534	-2.49846	0.543905	-0.63053	-2.23657	3.19365	-0.237006	-1.48027	-0.6704	-2.98006	-2.15805	-2.03835	1.78778	-1.38354	4.42117	-0.234185	0.301867	-1.44702	-2.7277	-0.696636	0.26848	1.93259	-2.04236	-1.13336	-1.09275	0.14486	0.0731833	2.95567	-0.469983	3.07972	0.085808	-2.31671	1.2139	-1.47917	-1.7447	6.21835	0.588293	-0.0460656
TCGA-C5-A7UH-01	-1.42265	-1.42907	-0.818919	-5.84585	-1.56043	-2.78501	-0.446936	0.0947976	0.157821	0.385823	-1.25072	-0.77283	-0.993362	0.175309	0.768993	-2.64708	0.681265	-2.70255	-2.76524	0.15425	-3.02402	-0.579086	-0.257231	1.5491	-1.19458	1.05091	-0.860197	0.407682	-3.53935	-2.33041	0.177588	1.72975	1.66479	-2.43425	-2.95439	-2.96269	-0.218117	-0.997667	2.69837	-4.42738	0.509343	0.766068	-3.33865	0.900584	-1.11881	-1.70775	5.47972	0.0490012	0.239915
TCGA-C5-A7UI-01	-1.11003	-0.645148	-3.02645	-2.12035	1.73539	-2.68357	0.0415297	-1.32363	-0.549634	0.340856	-0.578652	-2.53229	-0.504897	-0.679177	-2.012	-1.61804	3.2045	-1.47712	-1.65529	-1.54491	-4.236	-4.01345	-1.24989	2.4219	-0.102045	1.83893	-1.81919	-1.52706	0.90331	-1.62854	0.530702	0.218214	1.90212	-3.4763	-1.03296	-3.05919	2.20895	-1.08178	2.58017	0.536816	2.29549	0.941375	-2.85019	-1.1288	-1.39116	-0.840772	6.76966	1.21771	-0.801352
TCGA-C5-A7X3-01	-1.46341	-1.4777	-2.2074	-2.35606	-0.428491	-3.04664	-0.495568	-0.931114	1.11427	0.397134	-2.28567	-1.48443	-2.14401	-0.686778	-0.449563	4.20826	4.14133	-2.07311	-3.77735	-0.930006	-1.8345	-3.72047	0.346866	1.975	1.33164	4.4673	-0.271399	-0.67115	-0.365591	-2.6131	2.60719	0.524998	2.02263	-3.06784	-2.45048	-1.95886	0.733251	-0.997389	1.16861	-1.203	1.29079	-0.640116	-2.55721	-0.352738	-1.9827	-1.49335	5.55739	0.269186	-1.90323
TCGA-C5-A7X5-01	-2.50388	-1.70019	-4.81176	-3.16324	-1.53535	-3.52547	0.411969	-2.27244	-1.6651	0.694434	-0.448032	-2.45136	-2.47708	-2.47334	-0.591583	1.11497	2.05154	-2.59947	-2.70364	-1.98183	-4.96242	-3.68098	0.00857844	0.763653	-0.833901	1.59364	-2.3046	-1.87162	-0.607383	-1.66567	0.587788	-0.685085	0.944817	-3.6722	-2.19235	-1.97826	-0.233681	-3.92368	-0.915363	-2.08038	0.64062	-0.581513	-3.93918	0.00727553	-1.07805	0.539721	4.00397	0.9438	-1.72333
TCGA-C5-A7XC-01	1.05995	-0.501074	-0.243243	-3.01675	-0.796102	-4.59358	0.469396	-1.31818	0.313272	1.79026	-2.29374	-1.41993	-1.06713	0.547647	0.919447	-1.18375	2.86	-1.33054	-1.43189	-0.836937	-1.49136	-3.34855	0.49474	2.72575	-1.47207	1.9513	-1.24026	-0.571568	-0.260449	-1.66818	0.882254	0.00865115	0.157523	-1.64633	-1.67549	-0.809321	-0.939215	-1.11731	1.49067	-1.10409	0.373208	-0.612142	-0.803412	0.686022	-3.44872	2.30451	5.09866	1.21965	-0.160663
TCGA-C5-A8XH-01	-0.7961	0.121294	-0.958644	-2.77907	1.55628	-3.68865	-0.607066	-2.28035	-1.21242	1.83929	-1.13991	-1.83693	-1.28646	-0.524934	-1.75054	0.141445	2.48273	-1.97816	-2.04085	0.30245	-2.83015	-3.6076	0.860504	2.55538	-2.73158	1.61918	0.332345	-1.52818	-1.35553	-1.19098	-0.233371	0.00162918	0.795658	-2.5034	-2.96696	-1.60087	-0.493725	-1.70499	-0.125481	-0.702991	1.87759	-1.05974	-2.46226	1.22513	-2.32515	0.0870328	5.02502	-0.0780839	-1.30578
TCGA-C5-A8XI-01	1.96621	-0.573099	-0.130081	-3.85718	0.176703	-3.52391	-0.335406	-1.89742	0.301699	0.902991	-2.65797	-1.54666	-0.596621	0.729744	-0.396317	2.57053	3.13171	-0.310915	-2.05298	-0.921848	-2.31176	-2.98829	0.496554	2.84566	-4.17169	3.82957	-1.55602	0.590765	-0.0652518	-1.61906	0.570492	1.75134	1.22986	-2.24555	-0.863618	-0.784048	0.201535	0.233162	2.55183	0.332119	1.83589	0.426936	-0.143709	-0.354669	-2.45997	0.351313	5.77709	0.408589	-0.431487
TCGA-C5-A8XJ-01	2.08889	-1.64829	-2.95809	-5.16302	-1.04425	-2.93483	-0.00113912	-0.600004	0.361047	0.517866	-3.26178	-0.466437	-0.383446	0.877931	2.59484	2.40807	2.61186	-2.67179	-2.34746	-0.128149	-2.99326	-3.96866	-0.248167	2.58743	-0.391032	2.18858	-0.566403	0.283719	-0.186664	-1.56269	0.446039	1.59923	0.864526	-0.504014	-0.0167392	-0.268968	-0.187358	-1.15246	2.90057	0.331297	0.203067	-0.168408	0.52218	0.741966	-0.346362	-0.413955	4.20378	2.39472	0.372554
TCGA-C5-A8XK-01	-0.66609	-2.01618	-0.95387	-4.21384	-1.595	-2.94769	-0.641443	-1.14446	-1.01086	1.27136	-2.30837	-2.58139	-3.55052	-0.135395	0.244243	-3.18172	3.14159	-1.90704	-1.34824	-1.5009	-2.51956	-2.16209	-0.746452	2.00357	-4.35843	3.32588	-1.19022	-0.214566	-1.83695	-2.11205	1.90842	0.316671	-0.126799	-2.49369	-2.35153	-4.43022	-0.570166	-1.49028	1.66097	-2.85051	0.742257	-1.01462	-3.80618	1.04637	-2.61018	2.08776	4.20353	-0.208601	-0.29976
TCGA-C5-A8YQ-01	0.58227	-4.2627	-2.69167	-4.02741	-1.38209	-3.37221	0.745902	-1.05505	-1.70538	0.942979	-0.847312	-1.07303	0.351913	-0.0526415	0.857134	2.0942	2.7824	-1.17629	-1.38045	0.392121	-3.2242	-2.65373	0.0573641	2.1286	-1.17033	2.28207	-0.868272	-0.173599	-1.32859	-1.08522	1.46522	0.496409	0.934102	-1.96457	-0.743629	-2.76985	-0.0252794	-1.4225	2.62307	-1.10115	1.42465	-0.743295	-4.14582	1.39877	-0.3505	1.27794	6.90819	2.00482	-1.1508
TCGA-C5-A8YR-01	-0.933182	-1.23186	-4.0215	2.47804	-0.745093	-3.83475	1.96224	-0.594657	0.0402727	1.526	-2.94017	-0.702919	-1.25538	-0.287598	1.17048	0.463716	4.94855	-1.52109	-0.534864	0.781961	-1.06782	-4.8565	-0.234964	1.66905	-0.201098	6.25091	-1.36679	-5.82955	-0.987048	-2.16417	1.84172	0.719116	2.24248	-2.65638	-1.40209	-2.73232	1.01226	-1.41582	1.98065	0.342151	1.54707	-1.19118	-0.395561	2.28811	-3.11873	1.17798	4.06545	0.981153	0.121728
TCGA-C5-A8YT-01	2.15506	-0.948017	-2.82597	-3.0403	-0.034985	-2.68407	0.206266	-1.70168	0.219056	0.236109	-2.2107	-0.758346	-1.25799	1.15313	2.09823	-3.35867	2.83405	-1.81098	-1.5252	-0.355928	-2.69652	-3.28842	0.704626	2.51964	-0.0188084	0.0983043	-1.18275	-1.69317	-1.27694	-1.36917	0.606572	0.584503	1.48052	-2.14981	0.249129	-0.944206	0.196298	-3.10781	1.53959	-0.654009	0.034789	0.348999	-1.76074	0.363634	-2.25108	0.158734	5.19141	1.34237	-0.38014
TCGA-C5-A8ZZ-01	-0.237874	-1.61511	1.59154	-3.06494	-2.38156	-3.14929	-0.177462	-1.77287	-0.488585	1.15934	-4.76372	-1.64549	-2.80871	1.29403	1.1626	-1.10321	2.50634	-1.37168	-2.54984	-0.965538	-2.05374	-3.17104	-2.60013	1.16187	-3.14499	2.2663	-1.39182	0.744656	-1.30159	-2.5689	-0.139774	0.589002	2.39407	-2.08957	-1.77552	-0.757349	0.615257	-2.08183	2.6886	0.174954	0.484073	-1.35372	-2.68585	1.07755	-1.57912	0.312424	4.15119	1.56134	-0.592991
TCGA-C5-A901-01	-0.358918	-3.28635	-3.84042	-3.50086	-3.5026	-4.75576	-1.36264	-2.0433	-0.930149	1.99669	-2.91278	-2.641	-0.325681	-0.399567	-0.928067	-1.85229	-0.237638	-2.81465	-5.67089	-1.82355	-3.75975	-5.48473	-0.50616	0.58139	-1.52008	2.80822	-2.65037	-2.45778	-3.1596	-2.88926	-2.00625	-1.85397	0.0128995	-1.81633	-3.02209	-1.12837	-4.59325	-2.36042	-0.277474	-1.93215	0.363029	-1.09625	-3.25436	0.612914	-2.21036	0.57247	4.31093	-0.191396	-1.88988
TCGA-C5-A902-01	-0.450489	-0.194703	-6.64819	-5.72759	0.597844	-3.3619	0.417278	-1.81119	-0.193406	0.362967	-3.99495	-0.451288	-0.934993	0.204107	1.06074	1.16783	2.83429	-3.3619	-3.73271	1.02609	-2.33942	-2.01152	-0.642819	2.50477	-4.47225	5.74233	-1.03412	-2.27633	-2.29181	-2.73196	-1.00869	1.38119	-0.318622	-2.50863	-2.02877	-2.88508	-0.877466	-0.229594	1.62202	-1.69441	1.09792	1.08902	-1.58297	1.80311	-2.73161	3.95122	5.12845	1.25779	-0.78603
TCGA-C5-A905-01	-0.873176	-4.68628	1.16239	-5.18795	-1.54263	-4.67026	0.263432	-0.832264	-0.229508	0.194415	-2.43362	-1.68103	-1.11307	0.655273	0.747397	-2.22622	1.99842	-1.59987	-1.8305	-4.32301	-4.03681	-2.92118	0.257412	1.80205	-0.0825049	2.37372	-1.36323	0.66586	-2.65906	-2.4089	-0.581943	0.792245	1.76626	-2.79496	-3.39602	-1.25232	-2.18582	-2.27491	2.4794	-2.29916	1.87076	-1.54127	-2.92785	1.60126	-1.10316	-0.149384	5.11647	0.858036	-0.90106
TCGA-C5-A907-01	-1.37632	-1.22077	-1.10771	-2.62639	-0.831297	-3.55838	-0.385226	-1.24646	0.664563	0.793029	-1.15901	-2.06923	-0.201862	-1.15503	-1.57869	-0.752884	3.20259	-2.46527	-2.23404	0.641309	-3.58029	-4.03582	0.195891	2.86488	-1.2728	5.29554	-0.230598	-2.91575	-0.00286206	-2.7098	1.97677	0.458883	2.008	-3.18316	-2.96222	-2.40348	-0.0739452	-1.90412	1.18738	-1.11329	2.23848	0.307575	-4.04248	0.753977	-3.73545	-0.361943	4.49817	0.700777	-1.02861
TCGA-DG-A2KJ-01	-1.90672	-1.14639	-1.33865	-2.23971	-0.573205	-3.88525	0.277256	-1.54476	1.40935	1.24513	-2.34838	-0.333091	-3.57382	0.101249	1.17925	5.7603	5.15643	-1.09865	-1.23053	-0.515636	-1.2778	-6.09965	-4.33609	1.09575	0.272171	2.86125	-2.1949	-0.428841	2.53534	-1.34319	2.90608	-0.983464	3.30099	-3.5625	-0.534203	-1.14539	5.20281	0.670738	1.65992	-0.352694	2.04089	-0.434333	-3.93639	0.418325	-5.06232	-2.04245	6.61372	-0.638372	-0.867376
TCGA-DG-A2KK-01	0.726845	-0.764003	-0.449309	-4.57707	0.541699	-3.67081	0.475576	-1.31624	-0.549314	1.28726	-2.45952	-0.5967	-1.39415	1.1857	1.07707	0.709866	2.58427	-2.90528	-2.09409	-0.542205	-3.93783	-3.01075	1.03485	2.52076	-0.501613	2.81683	-1.62682	0.691206	0.692061	-1.12875	0.548381	1.08896	1.50267	-1.79006	-0.931694	-1.60902	0.550589	-1.06902	2.63974	-0.19597	2.34844	0.234672	-1.19144	1.38236	-2.47865	4.72145	5.59658	1.20355	-0.72483
TCGA-DG-A2KL-01	0.847248	-2.04112	-2.09909	-3.16338	-1.07061	-3.06073	-0.399116	-2.22273	-0.52658	1.05622	-4.08282	-1.44347	-2.15066	0.870279	0.936889	2.12478	2.29735	-2.87169	-2.22097	-1.01304	-2.42728	-2.40723	-0.511568	2.09112	-1.13916	1.54073	-2.57682	-1.17778	-2.24217	-2.40995	0.0770565	0.0426953	0.521919	-1.94442	-1.8796	-1.21653	-3.31326	0.516819	0.984598	-1.1562	-0.263867	-0.578098	-0.789936	0.367324	-3.3898	0.630072	3.86492	0.983965	-1.14239
TCGA-DG-A2KM-01	-0.0818821	-0.762431	0.704266	-4.1121	-0.685206	-4.05384	0.339284	-1.647	-0.444184	0.291001	-2.8172	-1.52404	-2.3171	0.710634	-0.131629	-0.6556	0.548347	-1.98345	-2.50953	-0.899234	-0.583893	-5.0052	-0.760518	2.25732	-2.07226	-0.415855	-2.10045	-1.39329	-0.583207	-1.78235	0.100065	0.140732	0.345587	-2.42852	-1.28775	-1.14405	-1.30637	0.486556	1.62376	-0.93067	0.121533	-0.702454	-2.25698	-0.010127	-3.64594	0.575561	4.12509	1.02866	-1.21493
TCGA-DR-A0ZL-01	-0.733962	-2.21337	-3.28011	-2.21512	-1.55118	-1.46038	-0.856842	-0.579321	0.452726	1.77436	-2.61998	-1.93059	-1.27823	0.0502604	0.328538	-3.66842	1.92023	-1.48685	-1.44263	-0.765212	-5.09373	-3.09859	0.592817	1.5048	-4.31462	3.33288	-0.744034	-1.42919	0.413312	-1.30041	-0.327028	-0.585067	0.702001	-1.98039	-0.475656	-1.14433	-1.05687	-2.70135	3.5874	0.0737175	0.642579	-0.712821	-1.45158	1.21938	-2.09688	0.155648	4.60766	1.45952	-0.349397
TCGA-DR-A0ZM-01	0.957272	-0.809341	-0.328108	-3.74854	-0.0195171	-6.0971	0.180886	-2.01118	-0.663258	-0.762176	-2.74664	-1.66042	1.86846	-0.124274	-1.1574	-0.973578	2.66133	-4.51214	-2.10534	-1.03561	-1.66368	-5.50415	-1.50355	3.16401	-1.12222	3.59073	-0.74378	-2.37765	-2.17901	-2.06365	0.817616	1.09009	0.73973	-3.77434	-2.8005	-2.54988	-0.0891009	-1.46556	1.68969	-1.00815	0.343616	0.138091	-3.03276	-1.65746	-3.57373	0.699899	4.89848	-0.228731	-0.289146
TCGA-DS-A0VK-01	-0.399562	-2.79266	-1.14919	-2.24578	0.134046	-1.82911	-1.32838	-2.26487	-0.212056	2.29525	-3.56795	-2.56235	-1.14918	0.966447	-0.900397	0.557015	4.75558	-1.99903	-0.819643	0.560916	-3.85102	-3.04351	0.496545	1.40728	-4.26985	2.70504	-1.34932	0.423318	0.556488	-1.3431	1.33662	0.487719	1.37894	-3.93931	-0.702431	-0.486581	-0.929633	-4.39724	2.63126	-0.184702	0.856721	-1.60256	-2.41274	-0.280417	-1.83032	0.0136947	5.22997	1.89614	-1.03214
TCGA-DS-A0VL-01	0.793629	-1.66594	0.266067	-4.52179	-1.02658	-2.22023	0.0570811	-1.55216	-0.159944	1.0325	-3.4146	-1.71247	-0.705266	0.468066	-1.13011	-0.158806	2.37451	-1.64404	-1.85783	-1.13602	-3.41617	-2.75111	-1.16088	2.07895	-4.64562	2.64948	-1.15923	-0.912912	-1.23106	-1.9731	0.447272	0.251872	0.456726	-2.43937	-3.66846	-0.502397	-2.19523	-1.63309	2.49666	-1.53413	0.702158	-0.896169	-1.81326	0.473671	-2.31241	1.26468	5.07639	1.48639	-1.29255
TCGA-DS-A0VM-01	-0.726685	-0.503692	-1.68515	-2.88813	0.225609	-2.51075	0.0194868	-1.9831	-1.27579	1.06365	-1.73407	-2.61323	-1.46902	-0.939583	-1.24208	-3.37705	2.77564	-1.8096	-3.47319	-0.473845	-3.22947	-4.872	0.387989	1.98668	-3.35562	2.86652	-0.405362	-2.06743	0.327609	-1.61356	1.74785	1.17831	2.13087	-4.02672	-2.16835	-2.47716	-0.456951	-2.69323	1.38128	-1.56042	1.398	-1.86203	-3.64162	-0.234539	-2.39409	1.07829	4.82829	-0.670582	-1.62264
TCGA-DS-A0VN-01	-1.7977	-0.767757	-3.66363	-4.53246	-0.387219	-3.59973	-0.858687	-0.745796	-2.03856	0.901058	-2.72874	-1.74801	-3.41758	-0.89049	-1.25546	0.303742	1.68957	-3.15612	-3.77789	-2.13701	-2.18868	-3.07717	-0.229543	1.7288	-1.45976	1.0621	-1.70079	-2.40866	-1.58853	-3.34516	-1.56845	-0.56044	0.462658	-2.63955	-2.66253	-2.76676	-1.11529	-1.46742	0.352484	-2.36109	-0.0659066	-0.367646	-3.82079	-0.0742144	-2.6393	-0.75693	5.09544	0.423523	-2.02931
TCGA-DS-A1O9-01	1.19707	-1.86054	-1.45121	-2.20411	-0.415117	-3.1422	-1.30162	-1.71925	-1.91926	1.0777	-2.9679	-2.87544	-3.36511	-0.773704	0.679842	0.422509	2.31452	-2.2942	-3.51301	-2.05799	-1.3697	-2.69364	-0.751742	1.01937	-0.722402	1.98763	-1.49249	-0.647823	-0.750181	-2.78583	0.175676	-0.181521	1.45907	-2.86009	-1.60744	-2.12932	-0.994801	-2.21848	0.351583	-2.19461	0.529126	-1.53928	-3.04134	0.0629713	-4.09688	-0.329774	4.30449	1.01895	-0.694338
TCGA-DS-A1OA-01	1.50023	-0.714104	0.262594	-3.7382	-0.92428	-2.30142	0.838718	-1.94148	0.690196	0.710296	-4.04995	-0.757824	-0.30796	0.600126	1.19942	-0.681304	2.90857	-0.761547	-1.0715	0.598052	-1.56844	-2.51582	-0.498508	2.53636	-0.856313	2.98485	-1.14158	0.432745	1.52109	-1.63758	0.152041	0.707281	1.1569	-2.40609	-1.08377	-1.35511	0.389465	-0.876507	2.79501	-0.147376	1.86109	0.137113	-1.35256	1.46988	-1.857	1.01086	5.57481	1.76375	-0.603164
TCGA-DS-A1OB-01	0.267542	-1.08294	-3.33459	-4.41399	-0.820022	-5.01177	-0.618654	-2.35275	-1.45626	-0.453039	-1.6713	-1.57509	-0.971645	-1.33635	0.18515	-1.39781	3.18892	-1.94138	-3.34194	-1.96409	-2.32771	-4.30018	-0.409506	1.92741	-0.267813	1.84344	-1.14085	-0.614257	-4.00058	-2.54261	1.8252	-0.26199	1.29454	-2.31051	-2.73754	-2.42392	-1.52734	-2.06894	2.0537	-2.08125	-0.536844	-0.352269	-2.79988	-0.0301257	-1.58003	-0.63292	4.88134	0.352289	-1.45785
TCGA-DS-A1OC-01	-0.697479	-1.294	-3.7659	-4.18995	-2.22646	-1.67225	-0.960958	-2.33905	0.727215	0.712493	-2.75447	-2.94982	-0.402643	0.468269	-1.00806	1.79098	3.35466	-2.36858	-3.58738	0.0375632	-2.40559	-3.49238	-0.47102	2.81173	-0.508763	1.42141	0.234591	-0.529551	-1.00898	-1.12007	0.352364	0.00714033	0.842646	-2.67143	-2.11791	-1.97421	-0.229639	-1.42716	1.39353	0.00110948	0.243248	-2.52054	-0.228185	0.193917	-2.65668	2.52508	4.79877	1.96407	-0.32423
TCGA-DS-A1OD-01	1.9292	-0.294121	0.0176373	-3.24645	-0.12197	-2.38772	1.14353	-0.237962	0.231149	1.44615	-2.18898	-1.39161	-0.305025	1.49699	-1.18835	0.573262	2.83666	-0.527126	-1.32196	0.183273	-0.278182	-3.17763	-0.318309	2.81598	-0.698159	2.07915	0.46974	0.346829	0.0194043	-1.30124	1.81185	1.65845	1.06298	-3.0905	1.2273	-0.705965	0.603673	0.815808	2.22506	0.175767	2.39003	-0.831095	-2.14247	1.40331	-0.881981	-0.17814	5.35993	1.6455	0.16795
TCGA-DS-A3LQ-01	0.161074	-7.42933	1.32969	-3.80172	-1.42319	-3.24338	-2.2508	-2.66842	-0.889966	0.566138	-4.22039	-1.97662	-2.77994	-0.16377	0.346108	0.16002	3.20495	-3.82834	-1.45192	-0.0436887	-2.94336	-1.95528	-0.578744	2.50451	-1.01669	2.09504	-3.13799	-0.646553	-1.27282	-1.80984	-1.9699	0.617766	0.0629346	-3.76862	-0.839863	-1.08848	-0.121513	-3.58912	2.83292	-1.68281	-0.709555	-0.431871	-3.46444	0.00452974	-2.23282	0.714899	4.23653	0.966026	-0.588074
TCGA-DS-A5RQ-01	0.602346	-2.48736	-1.06833	-3.87356	-1.80315	-4.2083	-1.07822	-1.95527	-1.19593	1.66095	-2.97886	-2.13419	-3.48183	-0.329138	-0.0788636	1.42391	2.61238	-2.62334	-2.21654	-1.31674	-2.73836	-2.87839	-0.996181	2.01265	-3.92272	2.9108	-1.36595	-1.65878	-1.65278	-2.63181	-0.136864	0.195984	1.27386	-3.14858	-2.87518	-1.73148	-0.849399	-2.076	0.798952	-1.88874	0.00359184	-0.92731	-1.62201	0.790418	-2.80041	-0.306609	4.22967	0.145491	-2.45346
TCGA-DS-A7WI-01	-1.14631	-0.499587	-2.21043	-2.44613	-0.281941	-3.40956	-0.617894	-0.923873	-0.175973	1.81154	-1.28482	-1.87977	-1.07767	-1.01348	-1.99691	0.243931	3.70787	-2.00903	-2.23723	-0.477353	-2.05991	-4.039	0.987591	2.76408	-6.50481	3.64796	-0.011391	0.210346	-0.491475	-2.36721	0.556266	-0.306142	0.779936	-3.67177	-2.6759	-1.6697	0.70714	-1.09995	2.7211	-1.37951	1.42292	-0.543607	-2.78263	-0.0902196	-4.58663	2.59513	4.95193	1.1725	-1.80673
TCGA-EA-A1QS-01	0.555234	-1.84315	-0.458552	-2.63888	-0.999278	-2.42752	-0.87817	-1.48483	-0.0619091	0.581727	-4.03126	-1.13768	-2.52009	0.328076	0.710419	1.32677	1.17203	-2.16448	-4.16756	-0.253107	-2.91177	-1.66538	0.462064	1.76463	0.974254	1.85618	-1.88401	-1.41941	-1.46363	-2.22025	0.35715	0.105036	1.20589	-2.83657	0.180231	-0.808963	-0.990388	-1.90545	0.652295	-1.12926	0.115584	-1.10072	-3.84789	-0.426061	-3.38886	0.984649	4.28613	0.44085	-1.57376
TCGA-EA-A1QT-01	0.109089	-1.62397	-0.0509632	-5.15421	-1.70529	-2.14082	0.467099	-1.26247	0.89029	2.13908	-2.77667	-3.84369	-1.14694	1.27053	-1.82697	-4.34448	1.88449	-0.262449	-2.82918	0.123514	-2.6405	-2.38625	-1.3389	2.86021	0.593323	1.93126	0.704603	1.02103	-0.504301	-1.54077	1.81995	0.272467	-0.0671671	-3.25718	-2.09925	0.348233	-0.00151972	-1.17078	4.03817	0.233502	0.686412	-0.659528	-2.37731	0.718759	-0.953614	-0.298019	6.05053	2.68866	-0.715601
TCGA-EA-A3HQ-01	-0.852799	-4.41472	-2.25203	-4.97779	-2.27107	-2.26119	-0.79258	-3.18219	0.0872835	1.29289	-4.90622	-1.40947	-3.08726	-0.0887428	0.143241	-1.28223	-1.43697	-2.3283	-3.72886	-1.80352	-2.40268	-1.62214	-0.728522	-0.196477	-0.584044	2.4172	-2.03027	-1.71824	-1.3875	-2.55916	-1.18206	0.0391457	0.513798	-3.07594	-3.12446	-1.14787	-2.91426	-2.1492	1.08625	-2.18806	-0.531447	-1.1917	-2.22744	1.20959	-2.8533	1.16657	4.48212	1.1387	-1.08804
TCGA-EA-A3HR-01	0.846166	-2.3652	-0.321356	-4.05395	-2.24658	-3.03506	-0.372272	-2.28323	-0.513141	0.203718	-4.11195	-2.38498	1.73498	0.156103	0.453113	1.13216	1.1133	-1.06677	-1.75951	-1.88945	-4.24069	-2.86614	-0.281548	2.15728	-0.570389	2.15617	-2.7528	-1.22251	-0.225499	-1.45975	0.49144	0.273899	-0.232413	-3.12039	-1.75301	-0.443726	-2.07419	-2.41251	1.0679	-0.828129	-0.117912	-1.37074	-2.43984	-0.740476	-1.98081	0.884088	4.50058	0.0646292	-2.01719
TCGA-EA-A3HS-01	-0.625213	-2.01594	-0.667301	-4.78065	-2.08019	-2.43804	1.42562	-1.48099	-0.146103	1.74053	-4.50744	-2.37059	-2.2443	0.92271	-0.0593963	1.52348	3.16151	-2.32185	-2.89798	-1.1381	-3.0743	-1.93421	0.664716	2.04445	-3.808	2.23443	-0.672136	-0.275901	-1.88918	-1.4509	0.00113157	0.392194	2.22393	-2.16259	-1.27251	-2.65238	-0.207361	-2.42121	1.86741	-0.757317	0.72655	-0.863315	-0.585394	0.334283	-0.0854888	0.640389	4.61488	1.69724	0.12814
TCGA-EA-A3HT-01	0.692529	-2.93005	-1.44543	-3.27972	-1.42141	-3.10667	-0.266094	-1.96056	-1.68221	1.73506	-2.98415	-1.94683	-2.95052	0.00561617	-0.254856	2.63111	3.12765	-1.62125	-2.09219	-1.12938	-3.26351	-3.58411	1.05579	1.91497	-1.86292	1.51403	-1.58625	-1.04258	-1.46543	-2.15856	0.0848984	0.046652	0.603182	-3.06076	-1.99594	-2.4372	-1.69263	-0.373637	-0.244214	-1.46893	-0.242701	-2.04807	-2.74278	0.142281	-3.0911	0.718849	3.22587	0.995815	-1.22059
TCGA-EA-A3HU-01	-1.18484	-0.86435	-3.79758	-9.19891	-1.62071	-2.83322	-1.0751	-2.3578	-1.32807	0.255156	-3.56815	-1.24453	-3.59218	0.080711	0.422597	-1.22595	3.73801	-3.57019	-5.42642	-0.619724	-1.87785	-2.63259	1.1366	2.54728	-0.536861	1.48658	-2.22533	-1.62835	-3.08506	-2.71786	-0.601316	-0.306942	0.257365	-1.87304	-3.12158	-1.03447	-1.47432	-2.23143	0.816966	-1.58077	-0.229007	-0.329834	-3.14739	-0.89448	-2.3858	0.512081	4.29372	1.11125	-1.40031
TCGA-EA-A3QD-01	1.29251	-0.567707	-2.67335	-4.19635	-0.314473	-4.05948	0.55369	-0.0785286	-0.00270834	2.42121	-2.26322	-0.349778	-0.926046	0.643701	-0.552309	0.925658	2.45864	-2.70898	-1.65268	0.442587	0.088536	-4.10396	-0.170472	3.4216	-0.427652	3.16346	-0.369126	0.284457	0.443572	-0.6893	-2.61607	1.3969	1.93489	-2.46371	-0.790893	-0.297251	0.179844	-0.81383	2.90769	-1.15495	1.8459	0.647779	-2.37365	0.484496	-0.951145	0.483762	5.34801	1.30074	-0.0341089
TCGA-EA-A3QE-01	1.29799	-0.913434	-0.00437857	-3.79598	-1.77236	-3.48237	-0.0854002	-1.82495	0.143773	0.84962	-3.79196	-1.25868	1.21036	0.557875	0.134371	-0.0896217	3.05681	-3.21934	-4.16304	-2.3157	-1.49108	-2.16953	-0.2005	2.67849	-3.72844	1.17667	-1.46445	-1.11343	-0.914781	-1.74398	1.59405	-0.053339	1.01776	-2.18819	-2.58136	-0.472423	-1.17851	2.07088	0.93492	-1.26676	-0.0180903	-0.76528	-2.39858	-0.452126	-0.952488	-0.727035	5.47394	1.70452	-0.685712
TCGA-EA-A3Y4-01	-1.05851	-0.30984	-2.9545	-2.23804	0.833806	-3.33564	0.898607	-0.718858	-0.118993	0.777218	-1.30126	-0.764024	-0.518144	-0.597705	-0.137345	-0.679851	2.48045	-3.16006	-3.20895	0.753871	-1.39244	-5.05254	-1.14602	3.08683	-0.749331	5.14562	-0.147784	-3.70365	-0.842046	-2.49771	0.750702	2.1369	1.01707	-3.51538	-3.50501	-2.87588	-0.353701	0.244782	0.735967	-2.02381	2.31627	-0.18791	-2.97174	-0.192689	-4.79281	1.97429	5.7425	-0.609873	-1.80036
TCGA-EA-A410-01	-1.36797	-2.09574	-3.6498	-3.14423	0.272976	-3.71714	0.827982	-1.17461	-0.385588	-0.280843	-3.87103	0.0521158	0.771827	0.246801	1.46549	2.30517	4.04044	-0.116238	-2.57338	-0.0886085	-1.88107	-2.93154	0.305946	2.54208	0.273309	3.0083	-0.874786	-0.965988	-0.968978	-2.43116	-1.04511	1.59968	1.87868	-2.82735	-1.04298	-3.33985	-0.010314	-2.28527	2.07115	-0.252148	1.63771	0.251907	-3.35324	1.64342	-2.25678	-1.4593	4.86547	2.07722	-0.34563
TCGA-EA-A411-01	0.260247	-1.5317	-2.08208	-3.09847	0.708903	-3.14371	0.80222	-0.874381	-0.324516	1.47866	-3.5257	-0.893443	-0.544479	1.37448	1.15134	-0.0558157	3.2151	-1.98256	-1.21907	-0.724515	-2.64777	-1.63764	0.667112	2.74043	-2.23691	3.45269	-0.590863	-0.651038	0.511342	-0.955284	1.03188	1.69096	1.66253	-2.57995	-1.8777	-1.50573	-1.21182	-1.47779	2.24308	-0.443804	1.14791	-0.737188	-0.864206	2.02869	-2.28836	0.239657	4.18379	0.838113	-0.221864
TCGA-EA-A439-01	0.690894	0.069435	-4.85746	-3.99826	0.588878	-2.24924	0.752931	-1.28839	-0.565675	1.72074	-3.44126	-0.463105	-2.81075	1.09944	-0.591472	2.23677	2.91043	-4.15613	-3.01236	-0.90199	-2.63888	-0.810835	-0.346443	0.618424	-0.377414	1.81575	0.3643	-1.35868	-0.884402	-2.86461	-0.669651	1.36037	1.04635	-3.91584	-1.975	-1.87195	-0.398674	-2.40233	2.0202	-1.77243	-0.243792	0.0317564	-0.934248	2.23336	-3.16327	0.972075	4.21839	0.955096	0.0316727
TCGA-EA-A43B-01	0.381044	-1.41346	-1.6196	-1.46767	0.192142	-4.1199	0.240049	-1.60384	-0.159995	0.589698	-1.3055	-2.00515	-2.07978	-0.927752	-1.20475	1.16963	2.57454	-2.00887	-1.86511	-1.31323	-1.97189	-2.79825	0.0380622	1.91768	-4.04522	2.65558	-1.08851	-0.928838	0.798185	-2.1754	2.29703	0.103811	0.120821	-3.0036	-2.52374	-3.38004	1.0426	-3.25508	1.23285	-1.82681	1.35503	0.298593	-0.463224	0.135309	-3.03394	2.05918	4.59156	0.333426	-2.00892
TCGA-EA-A44S-01	0.139827	-1.73233	-1.19524	-3.70057	1.61085	-3.96423	1.87635	-0.235468	0.443404	1.60723	-3.42736	-1.52755	0.416362	1.1209	0.321524	1.15047	2.08994	-0.635107	-1.60324	0.405384	-3.35678	-2.85671	-2.50818	3.46869	-1.25373	2.98663	-0.729557	0.170252	0.923484	-1.47541	1.30515	3.20902	2.41056	-2.70288	-1.32368	-3.63941	-0.479795	1.10245	2.43203	-0.144097	2.78682	1.48669	-1.79298	2.05072	-1.68187	-1.53647	6.19899	0.226065	-0.873107
TCGA-EA-A50E-01	-0.0987896	-1.89694	-2.61467	-3.56854	-0.627766	-3.46588	-0.008631	-1.28685	-0.505973	1.05837	-1.8359	-0.688162	-1.03581	0.475271	0.143168	0.664659	3.12263	-2.00121	-1.57366	-0.211744	-2.05483	-3.47865	-1.28446	1.85833	-2.08539	2.87254	-0.512494	-0.483402	-1.13276	-2.24574	0.00352177	1.02087	0.518504	-2.72809	-1.38429	-1.58852	-0.215911	-2.18602	2.16741	-1.21343	1.13833	-0.599926	-2.83895	1.14752	-2.71695	0.412543	5.37184	1.38068	-0.640651
TCGA-EA-A5FO-01	-0.0419984	0.147249	-1.24166	-5.45035	-0.592037	-2.14606	0.140588	-1.39422	0.671882	0.656989	-6.17714	-1.35847	-1.4651	0.989841	0.669824	3.12977	2.44544	-1.23666	-3.09289	-0.0462464	-4.93664	-3.12913	0.418698	1.89635	-0.214114	2.95705	-0.657337	-0.727781	0.0558255	-1.71252	0.790092	0.0901498	1.89304	-3.34686	-1.37302	-0.503493	0.515257	-2.12923	2.1239	-0.34188	0.297165	0.565572	-0.720757	1.48372	0.352986	1.58257	5.48844	2.22555	-0.651743
TCGA-EA-A5O9-01	0.146185	-1.90138	-3.04966	-4.9462	-1.39774	-1.84354	0.090149	-1.99187	-0.868142	1.8018	-2.80792	-0.597541	-2.82489	0.143737	-1.10439	0.90167	3.37819	-1.46186	-1.98106	-0.659791	-2.50288	-1.95841	-0.273919	1.66026	-6.74614	3.18872	-1.16699	-1.57531	-1.05473	-2.81136	-0.631294	-0.370596	0.333491	-3.65007	-3.37666	-1.32607	-1.90342	-2.0491	0.0266974	-3.94277	0.216353	0.0630581	-2.90848	0.180511	-3.243	0.570417	4.39941	1.3874	-2.41063
TCGA-EA-A5ZD-01	1.56546	-1.72608	-0.658022	-3.62006	-1.14878	-3.3799	-0.335791	-1.19399	-2.01373	1.90439	-2.5395	-0.900153	-1.7503	-0.237348	-0.766885	1.4502	3.02928	-1.66941	-1.67765	-0.710728	-2.36939	-3.96628	1.79728	2.19229	-1.17802	1.52657	-0.827054	-0.778854	-0.506209	-1.22589	-0.363506	-0.545231	0.104408	-1.85362	-1.19878	-0.266585	-2.3549	0.84992	1.93391	-0.639353	0.764877	-0.388417	-5.47544	0.106193	-2.76848	0.861446	4.8507	0.836387	-1.36203
TCGA-EA-A5ZE-01	0.551937	-1.45852	-2.13214	-5.99581	0.437998	-2.47812	0.813121	-1.29909	0.0211543	1.49281	-3.72261	-0.948328	-0.19794	0.360605	-0.14793	1.0212	4.12066	-1.95205	-2.14532	0.0390521	-1.69784	-3.76652	0.847141	2.36455	-3.08151	4.78922	-0.235226	-1.1546	-1.14499	-1.94024	-0.172215	-0.43883	0.31362	-3.15537	-0.918485	-1.3053	-0.856181	-1.13936	1.53529	-1.65451	0.951006	0.838497	1.29177	0.661069	-4.65519	4.14866	5.26935	1.92132	-0.279673
TCGA-EA-A5ZF-01	0.295515	-0.10414	-1.40189	-3.1705	-1.01856	-3.35661	0.0245418	-1.13674	-0.114362	2.69249	-3.2361	-0.64239	-1.82011	2.05799	-0.470022	-1.65775	3.85589	-2.23108	-0.431959	-0.0593992	-3.20859	-1.40108	1.09944	2.82358	-0.227409	1.21426	-0.388719	-0.0727459	1.04065	-0.300348	-1.83206	0.333677	1.33158	-3.27089	-0.760445	-0.82825	0.712792	-1.79921	4.07085	0.559794	0.98082	-0.447581	-2.45214	2.06986	-2.74518	1.75468	3.66331	1.64927	0.0262663
TCGA-EA-A6QX-01	0.416649	-3.2817	1.14384	-3.42191	-2.27556	-3.85064	0.959567	-1.89717	0.101233	1.03002	-4.7732	-1.19156	-0.501073	-0.0131209	-0.331787	1.92095	4.90779	-1.54321	-2.85888	-1.01154	-1.61516	-4.89512	-0.601042	3.20075	-3.76597	2.79857	-0.791052	-0.310164	0.941919	-0.847243	2.58042	0.543001	1.99311	-2.15865	-1.86216	-1.35589	0.0932282	-3.13337	1.80939	-1.04799	0.753574	0.384551	-1.53254	-0.0890729	-1.85778	-0.149857	5.89344	0.87571	-0.649542
TCGA-EA-A78R-01	0.056051	-2.77185	-1.59146	-2.79959	-0.672598	-3.34079	-0.452903	-1.06984	-0.776808	0.977455	-3.17024	-0.489069	-2.51478	-0.206429	-0.723022	1.41613	2.9681	-1.59233	-2.79649	-0.601224	-2.05527	-3.17668	-1.06917	2.32855	-3.43603	3.27904	-0.802439	-1.85016	-1.00766	-3.05925	-0.469287	1.19327	0.602955	-4.11757	-1.74463	-2.01597	0.143647	-0.645887	0.630535	-0.895694	1.7191	1.04454	-1.71386	0.64086	-4.25482	-0.0125611	4.42519	0.187504	-1.77037
TCGA-EA-A97N-01	0.0742834	0.342128	0.968549	-3.6102	-2.27232	-3.58436	-0.284352	-1.04593	-0.133314	1.38976	-4.28453	-2.14768	-1.40786	0.763799	-0.149343	-0.64847	2.93376	-3.73637	-4.5926	-1.74526	-3.85139	-3.33933	0.134719	2.17425	-2.3804	2.65353	-0.620992	-1.72741	-2.25124	-2.31793	2.23882	0.0723113	0.837427	-1.63712	-2.9882	-1.08962	-1.51497	-1.81265	1.37385	-0.495412	0.912935	-1.13344	-1.36248	0.0693996	-3.17647	0.3459	4.36319	0.794966	-0.675717
TCGA-EK-A2GZ-01	-1.14183	-3.20051	-0.479827	-2.92959	-1.70894	-3.1141	-1.79137	-3.16593	-1.67204	-0.61444	-4.01394	-3.33277	-2.68041	-0.603983	-0.953078	-0.590703	0.497127	-1.28919	-2.39918	-2.37781	-4.03648	-3.76662	0.443618	1.08677	-5.03181	2.32139	-0.877466	-1.78697	0.803988	-2.50302	1.07747	-0.178367	0.0222875	-4.76863	-1.2664	-2.30713	-1.11509	-3.5827	1.58056	-1.44661	0.148421	-0.903497	-2.55756	0.91872	-1.39808	0.844177	4.35868	1.5753	-1.76972
TCGA-EK-A2H0-01	0.760074	-0.332147	-1.8893	-5.32715	-2.08682	-2.78743	-0.0139643	-1.6719	0.580944	1.73787	-3.26253	-1.6947	0.422122	0.331842	-1.11235	-3.15896	-4.05067	-1.46026	-0.95742	-0.490223	-2.63941	-1.78884	-0.322665	2.88563	-0.125358	3.06355	0.198379	-0.639891	-0.913735	-0.731172	0.582606	2.42311	2.15631	-2.80863	-1.3653	-2.41954	0.366857	-3.42268	1.37211	-0.444214	1.30488	0.648842	-2.63503	0.520464	-0.916135	-0.760204	5.06797	1.49925	-0.0130483
TCGA-EK-A2H1-01	-1.32381	-0.61201	0.249318	-2.29786	-0.223621	-3.74979	-0.0881829	-0.936047	-0.384496	0.975076	-2.82436	-1.31311	-2.04408	0.0121359	-1.0808	0.727671	2.4732	-1.34925	-1.85757	-1.59519	-1.75378	-3.96419	0.322927	2.47349	-0.67511	1.67479	-0.574012	-1.50428	0.509334	-2.70744	1.65372	0.830067	1.17319	-4.33393	-2.08324	-1.8083	0.622169	-0.136027	0.61746	-1.92619	0.769532	0.209273	-4.70782	0.0991009	-2.16133	-1.64396	4.63147	0.63459	-0.0919129
TCGA-EK-A2IP-01	0.19019	-0.47462	-0.903254	-2.83145	0.7062	-3.65738	1.2049	-0.852551	-0.660068	2.16963	0.072637	-0.741526	-0.646948	0.121339	-2.23022	-2.26338	4.18529	-1.09889	-0.443224	-0.493437	-2.96879	-4.08328	-1.2101	2.80637	-3.46386	4.38226	0.346134	0.13869	0.67575	-1.6609	2.4102	2.34722	2.27697	-1.1502	-0.792727	-2.67651	-0.108811	-2.93005	2.31653	-1.11712	1.61079	-1.02846	-2.43098	-1.59311	-1.97195	-0.814576	4.65459	1.73797	0.0842889
TCGA-EK-A2IR-01	0.203631	-1.89064	-1.27255	-3.48201	-0.532197	-1.57123	-0.3407	-2.00625	-1.42977	3.44077	-3.80745	-2.77013	-3.34017	0.936852	-1.40512	3.05444	2.88073	-1.91824	-1.70048	-1.76003	-4.47384	-1.49386	0.414572	3.00748	-5.39517	1.27486	-0.831963	1.33172	-3.09608	-1.96224	0.139733	-0.00385752	0.321892	-2.60395	-1.07816	-0.403944	-0.622843	-6.41238	3.2779	0.0271155	1.59647	-0.56325	-2.81738	0.590577	0.141918	-0.301004	5.12828	2.08878	-0.248101
TCGA-EK-A2PG-01	1.10212	-2.24391	-2.94589	-3.86659	-2.77382	-3.76394	-0.370816	-0.566048	0.376545	1.19413	-3.94953	-1.5337	0.557763	0.11523	0.840735	-2.73493	3.55741	-1.1504	-1.5916	0.198021	-3.47842	-2.17098	-2.07728	1.61135	-5.39975	4.3269	-0.122493	0.363315	1.75506	-0.819434	0.183515	3.56412	0.805412	-3.64763	-0.874994	-3.53865	1.23146	-2.21105	2.4791	0.127415	2.17043	1.63807	-3.137	1.68433	-2.30874	-0.0731386	4.83754	0.482943	-0.00189961
TCGA-EK-A2PI-01	1.80004	0.0549996	-0.842115	-4.32986	0.240691	-2.71905	0.809581	-0.871078	0.407213	2.08781	-2.83426	-0.751857	-0.660389	0.585376	-0.716993	1.64683	-1.52286	-1.99659	-2.25336	0.365159	-4.156	-3.66044	-0.469457	3.13267	-3.7554	3.97059	0.582734	-0.0991447	0.672966	-1.49544	0.407881	2.12133	2.19432	-2.86578	-0.849875	-0.731266	0.502347	-2.24279	2.35969	-0.144676	2.22076	0.334529	-0.985922	1.06162	-1.50381	-0.139288	4.42084	1.14931	0.640649
TCGA-EK-A2PK-01	-0.610447	-1.95292	-1.90126	-1.423	-1.77685	-3.76697	-0.636886	-1.75313	0.0270141	-0.0562335	-3.0521	-1.76325	-1.87823	-0.120662	0.672153	-3.17093	3.37823	-3.21443	-5.5301	-1.0978	-1.14503	-4.1513	0.841079	1.82171	-0.0699667	3.28605	-0.509578	-3.80241	-0.60377	-2.18143	2.97189	1.40783	0.0574727	-2.55525	-2.53338	-2.19704	-1.13053	-1.56251	1.21172	-1.63382	0.181889	-0.848548	-2.573	0.0877037	-3.11397	-0.45024	4.93598	0.442433	-0.722624
TCGA-EK-A2PL-01	-0.132687	-2.63128	-0.00753874	-3.98095	-0.284101	-1.71479	0.56636	-1.31492	0.254248	0.753536	-2.63735	-0.582964	0.449535	0.638506	-0.189307	-1.84929	4.3034	-1.55867	-1.72303	-0.152532	-5.37413	-2.5271	0.0493782	2.26031	0.568724	3.96132	-0.0244389	-0.802702	-1.38167	-1.33372	1.6615	2.44573	1.12204	-2.977	-1.83852	-1.13843	0.42172	-1.92035	2.20617	-0.650787	1.66703	-1.91923	-2.69882	1.47331	-3.89186	-0.679346	5.10371	1.91304	-0.679843
TCGA-EK-A2PM-01	-0.995416	-3.45945	-2.14476	-3.8802	0.0941777	-3.82194	0.0659449	-3.03286	-0.367473	-1.52397	-2.40346	-0.899831	-3.11623	-0.0498701	0.035497	-1.79294	-0.0896967	-2.07348	-1.87909	-2.01526	-4.99585	-3.60338	0.146756	-0.434167	1.99421	3.61823	-0.579046	-2.08339	-1.48881	-3.66593	-0.837963	1.70043	1.56238	-2.65119	-2.02415	-1.04646	-0.489508	-3.80511	2.79779	-0.970853	1.84281	0.94448	-1.02508	1.4689	-2.03553	-0.493713	5.58528	1.58248	-0.0244549
TCGA-EK-A2R7-01	0.743641	-0.675098	2.22936	-2.69134	0.113452	-3.60249	0.76004	-1.52634	0.0043283	1.81787	-3.48853	-0.451211	-2.84466	1.61814	1.55405	-0.327509	3.88761	-2.45493	-0.252277	-0.726865	-1.98499	-1.90262	0.875582	2.11864	0.58909	2.92001	-0.0276158	-0.186596	0.422512	-2.19697	-0.318955	1.7486	1.52694	-3.47768	-1.45884	-1.07122	-0.0636082	-0.810368	2.48554	0.681322	1.10864	0.621918	-0.479601	1.50128	-3.02057	2.26779	4.80325	0.0889981	0.304907
TCGA-EK-A2R8-01	-2.71344	-1.06636	-2.60456	-2.56396	-0.483427	-3.34801	-0.589897	-1.59248	-0.310103	1.46283	-1.29075	-2.08126	-4.25898	-0.320369	0.907803	-0.774691	3.18803	-0.888583	-2.00262	-1.67884	-3.97761	-4.34002	-0.55093	1.32813	0.0684951	3.28997	-1.50566	-3.03296	-1.27792	-2.88473	1.96986	1.30866	1.93812	-3.73575	-1.87738	-2.19312	0.136421	-1.74622	0.976533	-1.02845	0.323313	-1.06702	-2.86864	0.166585	-2.35516	0.767805	5.19206	0.997167	-1.9151
TCGA-EK-A2R9-01	1.19722	-1.90112	-2.09924	-3.78131	-0.0104596	-3.26361	1.75045	-0.873079	0.101684	2.12449	-2.0056	0.0387689	-0.820937	0.764739	0.69336	3.80735	4.21551	-3.58554	-1.40615	0.452869	-2.1156	-2.55202	-1.37342	3.07353	-1.42026	4.04112	-0.110916	-0.0633279	-1.25241	-1.71459	0.683838	1.75365	1.08483	-3.52582	-0.846422	-2.26072	0.523386	1.61782	2.82319	0.157235	2.31286	0.468042	-2.48468	0.0515435	-1.76261	-0.198419	5.55811	1.13749	-0.537918
TCGA-EK-A2RA-01	0.15096	-0.15603	-0.466099	-4.95048	-0.764598	-4.33968	0.4395	-1.22867	-0.249571	2.7919	-2.98922	-0.844103	-1.31204	0.417151	-0.160313	0.33318	3.84235	-1.58479	-0.24638	0.479244	-1.26093	-2.79919	-0.398204	2.53995	-0.605199	4.68847	0.123264	-0.109272	0.27885	-2.08596	-1.03377	1.30358	0.739224	-3.60189	-0.812781	-1.42989	-0.100356	0.356631	1.36028	0.621116	1.647	0.400746	-0.867256	1.35395	-3.34682	0.385765	4.84832	0.864972	-0.414913
TCGA-EK-A2RB-01	-0.194366	-1.70524	-0.838002	-4.31794	0.786332	-4.18107	1.99936	-0.894614	-1.22919	0.9683	-2.00209	-0.628907	0.644938	0.498736	0.377942	-2.50821	4.13147	0.115391	-1.91629	0.510477	-3.2257	-3.00315	-0.903989	3.35715	-5.78446	2.5122	0.0328484	0.692184	-0.147501	-0.476063	2.89302	1.78681	2.63832	-2.79942	-1.99994	-1.53432	0.857958	-1.33135	2.35811	-0.196813	2.49843	0.772352	-2.91028	0.169304	-0.380855	-2.33827	6.11471	1.49466	0.0910501
TCGA-EK-A2RC-01	0.387225	-2.20101	0.164868	-4.62467	0.731136	-2.84394	0.807601	-1.18063	-0.160292	2.03373	-2.22436	-0.195758	-0.0332072	1.17121	0.576071	-0.544544	2.32349	-0.228925	-2.68507	0.162266	-1.65846	-3.26188	-1.63582	3.29123	-2.57978	2.06967	-0.286042	0.86534	-1.29931	-2.3364	1.65366	2.08604	1.75876	-3.10615	-1.40825	-1.89258	-0.437512	0.219578	1.75111	-1.32485	1.72735	1.09601	-2.33566	0.868816	-0.436051	1.21036	6.13194	1.31875	-0.560927
TCGA-EK-A2RE-01	-0.196491	-1.9446	-1.97386	-5.26185	-0.874331	-3.80305	-2.96247	-2.67555	-0.66729	0.575429	-3.34095	-1.83585	-2.12905	-0.0419695	1.03462	0.635345	1.86346	-1.42454	-2.33736	-0.76464	-4.91807	-2.79506	-1.55345	1.65353	-2.1279	1.75776	-1.96069	-0.609673	-1.73296	-3.12158	0.0716985	0.0987378	0.814466	-2.12666	-3.46992	-1.89326	-1.58165	-2.84762	0.00604047	-2.35795	-0.198836	-0.406578	-5.02411	-0.124624	-2.27968	-0.68723	5.07338	1.16405	-1.78517
TCGA-EK-A2RJ-01	-1.08103	-1.61614	-2.05104	-1.59384	-1.69747	-4.10262	-0.557498	-1.99715	-1.92185	1.26329	-0.620197	-1.96139	-0.948291	-1.30247	-0.707891	-3.92162	0.781625	-2.92205	-1.31116	0.25461	-2.48068	-5.31702	0.219125	1.5904	0.376203	4.2663	-1.84523	-4.65264	-0.851957	-2.75154	-2.11864	-0.563405	0.0536666	-1.7274	-2.28407	-3.21076	-0.144255	-2.67075	1.8199	-0.487602	-0.305763	-2.40659	-3.20821	0.411979	-1.83491	1.31172	4.99509	-0.171518	-1.88544
TCGA-EK-A2RK-01	0.589708	0.271013	-1.14251	-3.19055	0.854922	-3.27655	-0.108398	-1.24062	-1.07578	1.17901	-3.54961	-2.34237	-2.36809	0.856882	1.46508	-1.74007	5.05255	-1.19409	0.493994	-0.372912	-3.30911	-5.99346	0.261958	0.596229	1.17782	2.82086	-0.304428	0.312725	-1.124	-1.7308	0.15912	1.12273	2.62724	-5.04126	-1.01297	-1.16472	0.546685	-3.44029	3.49669	1.22574	2.58259	0.0869032	-1.38541	0.513916	-2.45362	-0.199287	5.06673	1.07117	-0.479891
TCGA-EK-A2RM-01	1.12259	-1.56043	-0.0709611	-1.83037	-0.554288	-2.19648	0.441604	-1.68472	0.215762	2.68904	-2.05193	-0.628556	-1.43367	0.614052	-0.508445	2.60133	3.34717	-1.06838	1.15115	-1.01273	-2.10094	-5.04832	0.783724	4.38898	0.42252	1.58834	-0.854053	-0.180056	0.283485	-1.59302	0.721606	2.57743	1.67171	-3.45869	0.0185877	-0.50909	0.524992	-1.31458	2.64697	0.781107	1.25245	-0.330527	-0.57385	-0.208056	-2.32293	3.47921	3.91581	2.05435	-0.0473629
TCGA-EK-A2RN-01	-0.0657506	-3.45885	-1.17453	-6.22356	-1.57824	-4.70586	0.272222	-1.36537	-2.20218	-0.193296	-1.46922	-0.532213	-0.9238	-0.226952	-2.03687	-0.35493	2.43519	-3.76475	-2.37306	-2.77365	-0.631847	-4.78276	-1.47863	2.05275	-4.04622	3.80986	-1.11504	-2.08595	-1.37274	-4.89381	-0.0665327	1.91839	2.0628	-2.53511	-4.1097	-2.38104	-0.958391	-3.55153	0.0619287	-2.99773	1.67596	-1.93944	-3.20446	0.502702	-3.50442	-2.60003	3.20777	-4.48135	-0.95102
TCGA-EK-A2RO-01	-1.4645	-2.77013	-3.95794	-3.45238	-2.26649	-3.67165	0.458437	-1.37909	-0.788555	2.34042	-2.49111	-2.66793	-2.47952	0.147646	-0.0101315	1.29943	1.35462	-2.18622	-2.97534	-0.417511	-3.8862	-4.05598	-0.537529	1.53371	-0.139155	3.48291	-1.21262	-1.50546	-1.92348	-3.50114	1.37122	-0.239347	0.580217	-4.10378	-1.8531	-0.931788	-0.357138	-3.82474	1.1981	-0.246732	1.81327	-2.23865	-2.77724	0.380473	-0.018642	-1.29833	6.7558	-0.594694	-1.73624
TCGA-EK-A3GJ-01	0.450122	0.161643	-1.55984	-3.22138	-0.376536	-2.81411	0.0481615	-0.654193	-1.41317	1.59571	-0.441217	-1.72138	-1.26167	-0.436027	-2.12393	-0.892866	3.18003	-3.68858	-2.61882	0.699412	-1.99625	-4.78751	0.043797	3.28898	-1.63747	2.75675	-1.31017	-1.48371	-0.480987	-1.98202	0.354288	-0.564403	1.33045	-2.83531	-1.72319	-3.94872	-0.882218	-1.23435	2.34732	-0.436132	1.04688	0.177374	-1.70019	-0.570872	-2.20269	-1.03843	5.48005	0.69916	-0.68076
TCGA-EK-A3GN-01	-1.18656	-0.895326	-0.169794	-4.91637	-0.227986	-3.05764	0.844867	-1.71269	-0.237599	2.10211	-3.60364	-1.86888	-1.03331	0.769356	-0.664096	2.99373	3.91576	-3.13564	-1.19833	-0.992536	-4.83562	-3.23457	1.34162	2.76532	-5.49392	5.07051	-0.585467	-2.73813	-0.272001	-1.77399	1.77117	1.13538	0.819506	-2.70979	-3.12444	-3.10628	0.46427	-4.70377	1.39439	-0.929735	1.04588	-0.854649	-0.87558	0.766339	-3.16071	2.92094	4.9709	1.4108	0.412748
TCGA-EX-A1H5-01	1.049	-0.826945	-2.06585	-4.05505	0.343828	-1.61828	0.363165	-0.967654	-0.26946	2.04697	-5.65631	0.577398	-2.26005	1.80095	0.338696	-2.74539	4.09664	-1.27432	0.088082	0.65424	-4.00078	-2.10685	0.515843	3.21248	0.535503	2.94132	-0.855774	-0.472739	-0.898127	-1.89649	0.124692	2.50788	1.71249	-3.99596	-0.768359	-1.57886	-1.24932	-2.60145	2.45112	0.847478	2.17858	0.171731	-1.14746	1.77398	-1.97222	0.138794	4.34015	1.15254	-0.362241
TCGA-EX-A3L1-01	-2.26263	-1.98061	-1.77383	-2.38492	-2.862	-2.41916	-1.7485	-2.63561	-0.25066	0.648673	-1.35065	-5.32232	-4.34804	-1.1341	0.816877	0.0676589	1.43154	-1.41916	-2.86035	-1.59798	-4.44107	-4.68801	0.574786	1.48503	-4.14	1.63386	-2.16176	-0.503508	-1.03356	-2.26477	1.6803	-0.6284	0.485907	-2.79239	-3.77053	-1.34672	-0.0457514	-3.25032	0.69146	-2.55902	-0.917753	-0.645122	-5.81014	-0.400981	-2.06571	-1.24378	4.06	-0.477857	-2.74113
TCGA-EX-A69L-01	0.548603	-0.634214	-1.82952	-4.72085	-1.27193	-2.67708	0.69401	-1.38453	0.171794	1.0562	-2.79994	-1.18793	-0.933542	-0.119195	-0.216264	0.801602	2.80861	-1.88354	-1.98078	-1.47739	-1.61153	-3.81348	0.667932	2.56695	-3.71343	3.75676	-1.74162	-0.905172	-0.343958	-1.44768	-0.57763	0.481043	1.00362	-2.35433	-1.16339	-0.379228	-0.275111	-0.875983	2.29898	-1.07999	0.994243	-0.0424537	-2.31319	-1.65891	-2.11719	2.11473	4.65259	0.385931	-1.65921
TCGA-EX-A69M-01	1.08606	-1.13899	-3.09278	-5.82426	-0.612839	-2.39145	-1.20295	-1.76496	-0.731777	-0.936538	-3.00085	-1.99916	-0.591921	-0.821476	-0.716374	1.09499	2.1782	-4.26592	-2.27416	-0.0942464	-1.53294	-2.74336	-0.0163253	3.26293	-1.23188	4.66974	-0.791298	-2.03833	-2.9328	-2.66246	-1.77945	1.24073	-0.0140565	-1.98381	-3.66976	-2.52606	-2.78149	-0.175843	1.2872	-1.76193	0.338291	0.474503	-0.654096	0.652256	-5.44299	2.62127	4.84465	-0.0376587	-0.690051
TCGA-EX-A8YF-01	0.633277	-1.11206	-0.905006	-4.30126	0.0290119	-5.1835	1.25534	-2.1935	0.961689	0.767373	-3.1467	-1.74682	-1.67942	-0.0971007	2.31976	4.32169	3.87894	-0.672537	-2.11374	-0.777358	-1.81309	-5.3979	0.28849	2.95362	-2.00262	3.48423	-1.96263	-2.14855	-1.85037	-1.9426	1.5284	0.94068	2.74297	-1.94321	-2.71287	-0.819148	-0.284026	-2.35931	2.35901	-1.32337	0.198322	0.641815	-0.849974	0.00460022	-3.24509	3.39627	4.59965	2.05875	-0.0687621
TCGA-FU-A23K-01	-0.802351	-1.41409	-1.77922	-4.25972	-1.10185	-3.47899	-0.464379	-1.11904	0.493199	1.38851	-3.98651	-0.240245	-3.09039	0.249077	-0.985416	1.65263	3.69272	-1.74647	-1.96527	0.396638	-1.14877	-2.61247	-3.17084	1.42718	0.426636	3.72065	-1.68172	-1.69445	-0.524373	-2.74589	-0.671889	0.366215	1.95131	-4.11971	-2.33534	-1.39517	1.11236	-2.40771	1.63077	-1.60505	2.18729	1.10157	-3.4936	1.13205	-2.96418	0.363813	6.24471	-2.17356	-1.83962
TCGA-FU-A23L-01	0.914134	-0.184886	-0.274318	-4.15122	0.916604	-2.54558	0.0226242	-0.803806	0.287949	-0.000470408	-2.21289	-2.47813	0.467821	1.14423	-0.350161	1.10539	3.97486	-1.02729	-1.28563	-1.02325	-2.14231	-4.07033	-0.458769	2.88722	-0.495017	1.0924	0.78552	1.16452	-0.03737	-0.606807	1.11355	0.332745	0.531427	-2.11813	0.44511	-0.737551	0.0290504	-1.2735	2.56096	-0.0659999	0.997518	-2.04886	-1.81395	-0.595473	-1.81887	0.150376	5.33774	1.11275	-0.718138
TCGA-FU-A2QG-01	0.21926	-3.81018	1.37267	-6.27532	-2.04504	-2.7397	-1.23898	-2.21919	0.110455	1.10129	-3.83219	-2.18344	-2.63296	0.409286	-1.74011	-4.14366	1.99622	-2.0221	-0.458437	-1.24045	-4.02465	-2.40521	-0.151019	2.53205	0.480286	2.8781	-0.435005	0.289506	-1.5765	-2.87123	1.53378	-0.638609	0.686191	-2.33054	-4.5765	0.558151	-1.55072	-2.72287	1.39308	-1.92021	0.624194	-0.821281	-1.24805	-0.231205	-2.31411	-0.00793513	4.53967	0.702899	-0.942738
TCGA-FU-A3HY-01	-0.201364	-2.83497	0.222946	-3.4228	-1.54504	-3.02058	-0.0868945	-3.04509	-0.53016	0.46833	-2.99205	-2.90583	-3.03108	-0.235935	-0.944966	-0.426796	2.77254	-1.43562	-1.29186	-0.972896	-7.1945	-3.09748	-0.526568	1.10912	-5.20894	1.29547	-1.37914	-0.647314	0.605325	-1.86458	2.81639	0.259715	1.41593	-2.47544	-2.35403	-1.90221	-1.68815	-4.51833	1.31014	-1.37385	0.154786	-1.36108	-3.17126	0.0753222	-1.34965	-0.855855	5.40422	1.57897	-1.03923
TCGA-FU-A3HZ-01	-0.847019	-2.68331	-5.439	-2.93344	-1.67717	-3.66728	-0.264826	-1.93621	-0.362727	-2.77531	-3.98216	-0.300991	-0.8831	0.721755	2.63691	2.9883	1.80901	-0.124142	-0.137104	-0.998109	-5.32662	-4.88169	0.264343	1.64387	1.36307	2.87759	-0.324855	-1.07712	0.558927	-2.7557	0.553732	1.30979	0.706143	-3.56692	-0.206053	-1.56485	0.817151	-2.87285	2.57911	0.555418	1.67977	-0.106183	-1.58718	0.57853	-1.60731	-1.82448	6.28579	-3.60627	-0.719798
TCGA-FU-A3NI-01	0.0757872	-1.9499	-2.73474	-4.07306	-0.63342	-2.71975	-1.00019	-2.23724	0.00406365	-0.536009	-3.76333	-2.91866	-1.21568	0.464825	-0.420622	-0.929123	3.35992	-1.10525	-1.92301	0.135835	-2.52283	-3.88525	-0.247217	2.08777	-3.70719	1.88043	-0.472344	-1.03726	0.181657	-0.522142	-0.364939	0.301333	0.547339	-3.31638	-0.213389	-2.13743	-0.0932988	-2.60671	2.01834	0.0472694	0.306586	-1.29674	-3.62887	1.01246	-0.884438	0.493885	4.15142	1.6017	-1.60566
TCGA-FU-A3TQ-01	0.756771	-0.126567	-1.57299	-4.12476	-2.24144	-3.02993	-0.940318	-1.99668	-0.496717	1.54062	-3.10681	-3.1168	-1.02704	1.00796	-1.14334	0.331422	2.73546	-0.898135	-0.91787	-1.79685	-2.19602	-3.63861	-0.184151	0.565019	0.845625	2.62365	-1.98867	-0.289722	-1.76093	-3.50524	2.12398	0.155655	1.20495	-2.11526	-1.74787	-0.18427	-1.48409	1.80764	1.89058	-0.0103605	-0.434701	-1.81306	-2.86766	-0.435777	-2.2387	-0.710687	4.33099	1.08041	-0.960703
TCGA-FU-A3TX-01	0.298911	-2.30753	-2.67872	-5.11176	-2.34091	-3.59406	-0.785907	-3.11864	-0.99398	-1.18271	-4.30804	-1.12567	-1.63933	0.807473	0.325795	1.73262	3.76401	-2.068	-1.8847	-1.74432	-4.03101	-3.16077	0.0594293	2.30496	-0.766475	1.79524	-1.39556	0.259966	-1.36047	-2.39499	0.471706	0.233722	0.911558	-2.27131	-0.495404	-2.36878	-1.10963	-1.33438	2.06597	-0.947336	0.880865	-0.265765	-4.13706	0.746038	-2.87067	-0.0434447	4.14662	0.471749	-0.755159
TCGA-FU-A3WB-01	0.557796	-1.84643	-1.05898	-4.18145	1.33942	-3.35765	1.10512	-1.2034	0.00878237	1.76428	-2.84411	-1.89296	-1.03415	1.30291	1.34113	2.57352	3.38407	-1.37473	-1.68077	-0.566487	-2.39021	-1.87816	0.479081	1.05046	-4.46354	2.98077	-1.0178	0.716167	-0.067595	-1.68066	-1.7607	1.07138	0.713641	-2.89997	-0.357102	-0.682887	0.324722	-2.18036	2.17952	-0.299581	1.43921	0.450588	0.0480662	2.22411	-4.03722	0.772725	4.03168	1.45888	-0.217787
TCGA-FU-A3YQ-01	-0.242142	-0.839997	-1.59089	-4.14236	-1.23825	-3.1459	0.415524	-1.74087	-0.770955	-0.368566	-2.57542	-1.14218	-1.72429	0.102624	0.859854	-0.742503	2.08004	-1.84334	-1.82157	-1.18722	-1.77549	-2.46414	0.0913116	2.49009	-2.78536	0.845716	-1.68687	-1.27445	-1.81278	-1.73254	-0.63141	-0.556059	0.929086	-2.18572	-2.1347	-0.717985	-1.83139	0.929822	0.718182	-2.06338	-0.349044	-1.5754	-3.04504	-0.876189	-1.87819	0.199399	4.81002	1.58376	-0.67346
TCGA-FU-A5XV-01	-1.12964	-2.98669	0.0553197	-2.93037	-1.187	-3.70763	-3.30001	-2.13267	-1.04318	0.629131	-4.38508	-2.70391	-3.12555	0.178035	0.652883	-1.46773	1.97685	-1.3666	-2.30083	-0.350401	-4.72954	-2.77003	-0.138575	1.38355	-1.08102	2.15274	-0.81797	-1.28364	-0.296503	-2.23456	1.0837	0.194155	0.945332	-2.33241	-2.37451	-1.55273	-4.39312	-2.6128	1.37234	-1.67757	0.167229	-1.27464	-2.19173	1.3191	-3.35419	-0.127866	3.80807	1.04392	-1.85968
TCGA-GH-A9DA-01	-2.12466	-2.29721	-2.8961	-2.35737	-2.04595	-2.94861	-1.08001	-1.92506	-1.3392	0.577007	-0.95863	-3.59939	-4.07256	-0.733097	0.16521	-1.36321	0.0181012	-1.56358	-4.62927	-1.66646	-2.56613	-4.66551	1.29445	1.00547	-2.30159	2.668	-2.47125	-0.848477	-1.70294	-2.90209	0.830549	-1.13428	0.492635	-3.71332	-3.26998	-2.71125	-0.851195	-1.93178	0.609166	-2.34305	0.805182	-1.05464	-5.08721	1.16485	-2.40578	1.09213	4.70056	-1.78919	-2.60316
TCGA-HG-A2PA-01	0.669694	-0.269378	-0.529866	-3.21139	-0.140981	-1.62014	-1.24321	-1.74057	-0.529644	1.45297	-2.87309	-1.43138	-1.68216	0.466617	-0.281042	-3.1021	2.80925	-1.43511	-1.09203	-0.783852	-2.44703	-2.78479	-0.17595	2.10605	-2.00717	2.38463	-1.70378	-0.345852	-1.79797	-2.01949	0.710858	-0.124976	1.18321	-2.62777	-0.59008	-0.0549555	-1.26815	-0.0183449	2.03109	-0.87865	0.298027	-0.779717	-2.18224	-0.125864	-1.87521	1.34397	5.33184	1.45973	-0.734712
TCGA-HM-A3JJ-01	0.943213	-1.72507	-0.573514	-3.86015	-0.402457	-3.26704	-0.204072	-1.55458	-0.433638	0.409206	-4.13714	-3.00029	-2.23245	-0.0286427	0.674581	-0.76411	2.54058	-2.41905	-2.12328	-2.18283	-2.38206	-1.17564	0.530041	2.64837	-0.617827	2.80092	-1.08365	-0.882948	-0.296488	-1.8335	1.22649	1.38368	0.42734	-3.11421	-2.25585	-1.27084	-0.952534	-1.83518	0.28078	-0.862591	0.21787	-0.455536	-3.07307	-0.0789449	-2.32864	-0.236616	4.55236	1.38093	-0.691173
TCGA-HM-A3JK-01	1.10547	-1.54212	-0.335341	-2.15873	0.254569	-3.73555	0.134777	-1.14267	-0.667581	2.34378	-3.11379	-0.491512	-2.53103	0.373529	0.27205	1.87591	3.83568	-1.56562	-1.86932	-0.208393	-2.26561	-2.90556	0.922132	3.34979	0.602271	3.0623	-1.1066	0.362407	-0.495533	-2.19348	0.707859	1.02422	1.44523	-2.91029	-0.891461	-0.995689	0.208318	-2.81183	2.12995	0.869417	2.16983	0.00487564	-0.786688	0.848135	-3.45319	0.989894	6.0275	2.1283	-1.94508
TCGA-HM-A4S6-01	-0.497831	-1.00786	-1.34169	-5.30862	-1.53777	-4.84982	-0.640004	-1.33	-1.41598	1.61202	-3.96502	-1.09121	1.48081	-0.244281	-1.89284	0.0860768	2.76423	-1.09493	-2.74258	-1.59568	-2.61434	-4.47926	-0.628234	1.82208	-3.57874	0.875627	-1.28499	-0.217083	-0.194762	-1.54591	1.09994	-1.04114	0.571974	-1.62017	-1.20926	-1.71764	-1.78042	-1.2784	1.4529	-0.571832	0.194969	-2.2469	-4.16399	-0.732107	-1.56745	0.693424	4.18704	1.70225	-0.297963
TCGA-IR-A3L7-01	1.62381	-0.0457656	-0.389532	-4.40502	-0.0685753	-1.98274	1.68096	-1.57217	0.877628	1.84783	-3.77567	-1.1685	-1.71968	1.35588	0.961844	-1.97862	3.28999	-2.83519	-1.61342	0.307919	-4.7982	-1.56369	-0.179831	3.09927	-0.932938	2.589	-0.490331	0.538761	-0.0770398	-1.0467	1.9007	1.09307	2.56521	-2.723	-0.999561	-1.03643	0.345572	-4.92939	2.61323	0.480728	0.776638	0.820201	-2.99736	1.96643	-2.01895	0.407544	5.43122	1.77814	-0.606415
TCGA-IR-A3LC-01	-1.55942	-1.43058	-3.82423	-4.08163	-0.355179	-3.3453	-1.18279	-2.31091	-0.994598	0.675965	-3.18039	-2.17165	-3.4489	-1.47201	-2.02575	-2.18701	3.87326	-2.38182	-1.8941	1.06535	-2.67372	-3.85926	0.479985	2.73042	-4.59505	2.75212	-1.53947	-2.00918	-0.10528	-1.88939	-1.03939	-1.35605	0.0948721	-3.21519	-2.74914	-2.905	-1.40143	-4.32847	1.10942	-2.09285	0.152001	-1.15741	-4.65947	0.444838	-1.96778	0.0824661	4.84815	1.26723	-1.19814
TCGA-IR-A3LH-01	-0.628064	-0.338269	-2.39281	-1.76255	-1.9644	-3.576	-0.320385	-2.21606	-0.638461	0.775408	-2.71787	-3.10279	-1.11415	-0.00663532	-0.746002	2.34751	0.167676	-1.48985	-1.78218	-0.65307	-0.470216	-2.51356	1.40714	2.18261	-1.15494	2.67442	-1.64749	-1.23507	0.757124	-2.07472	-0.338269	0.532236	0.790684	-2.58445	-2.09532	-1.36666	-0.544079	-0.401631	1.57945	-1.62189	0.649699	-0.0412521	-2.52023	-1.78022	-3.75307	0.716106	4.03266	0.127979	-0.843529
TCGA-IR-A3LK-01	-0.761832	-1.97976	0.124096	-4.60008	-1.05162	-3.21166	-0.598495	-1.46678	0.126756	1.81731	-2.8123	-2.35994	-2.62013	0.780269	-0.487138	2.08569	3.87022	-2.77871	-3.34543	-1.6356	-2.20567	-2.87148	0.796924	2.72752	-0.618657	3.18787	-0.936349	-1.61775	-4.87854	-2.73373	1.55367	0.93805	0.228505	-3.38641	-4.29358	-3.14988	-0.820338	-3.38748	2.13287	-1.55712	0.585194	0.592891	-1.49021	0.650207	-5.38873	-0.32447	5.83512	0.180265	-0.871861
TCGA-IR-A3LL-01	-0.248753	-0.627146	-1.42009	-3.57242	0.835854	-4.28355	0.672509	-1.31627	-0.76021	1.34314	-0.661787	-2.62447	-2.07903	-0.272755	-1.22704	0.974274	4.06493	-2.02051	-2.29179	-0.660176	-0.341117	-2.97439	0.374134	3.13803	-3.32894	4.40428	-0.820605	-4.47099	-0.143067	-1.93114	-1.01417	1.81791	1.4822	-4.22383	-2.29507	-0.843248	-0.991757	-0.347855	2.03324	0.138827	2.40813	0.612156	-1.33469	0.15609	-2.60264	-1.53386	5.11251	0.432817	-1.09575
TCGA-JW-A5VG-01	0.263948	-1.18647	-1.31235	-3.69661	-0.620905	-3.54391	0.966522	-1.1504	0.185815	0.807501	-2.9873	-0.451181	-1.59237	0.246194	0.611164	1.39925	2.43125	-0.932951	-1.46726	-1.33416	-3.15489	-2.38485	0.365996	3.17481	-1.35039	3.45482	-1.09059	-0.576076	-0.026358	-2.92594	2.25676	0.324711	1.69529	-1.98015	-2.40718	-1.45613	-1.19698	-2.52708	-0.00382018	-0.750891	0.37848	0.365116	-1.59505	1.17182	-2.59545	-0.768222	4.76702	1.14301	-0.789068
TCGA-JW-A5VH-01	0.303302	-3.43772	-3.03814	-2.53258	0.0158795	-3.4217	1.28138	-0.900179	-0.189072	-1.37444	-3.53067	0.140515	0.0323376	1.05552	1.41484	-2.5302	2.60046	-0.785205	-0.889369	-0.0826711	-5.73311	-2.66927	-0.202689	2.43002	-3.16259	3.72264	-0.646456	-1.42472	-0.740648	-3.02132	-0.649225	1.62057	2.27763	-2.28536	-0.825537	-3.81934	-0.00437655	-2.95741	3.29348	-0.207216	1.89301	0.923426	-1.51723	1.72522	-2.88827	0.0491339	5.67877	-2.87526	-0.318934
TCGA-JW-A5VI-01	-0.189929	-1.74441	-2.66955	-3.29231	0.337677	-2.29399	-0.0383701	-0.754076	0.148598	1.93713	-2.95351	-0.838196	-1.78991	1.53214	0.327252	1.52857	3.83199	-1.00238	-0.624154	-0.314471	-2.4679	-1.55233	0.0207049	1.68206	-0.118701	2.619	-1.1886	0.540047	-1.14529	-2.16445	0.615989	0.285872	1.11741	-2.74062	-1.4837	-0.197983	-2.13148	-1.03837	2.61726	-1.32282	-0.33363	-1.33492	-1.71596	0.292567	-1.30756	-0.451186	4.97238	1.7735	-0.112613
TCGA-JW-A5VJ-01	0.646157	-2.97142	-0.164248	-4.82359	-0.965282	-4.04286	0.967642	-0.432281	-0.569182	1.50375	-4.64349	-0.436255	-0.693296	0.33258	0.39831	1.83163	3.47976	-1.25627	-1.50678	-0.0517593	-4.30989	-5.44991	-0.516426	2.26007	-4.90929	1.97016	-0.41391	-1.02086	-0.124774	-2.67859	2.22652	-0.0117929	2.38354	-1.84564	-3.4467	-2.98107	-0.388502	-2.07184	1.52994	-1.42784	2.16339	0.729984	-2.87161	1.6568	-1.79367	0.581298	5.62777	1.7982	-0.243628
TCGA-JW-A5VK-01	-0.92405	-1.4434	0.507602	-3.52222	-1.26038	-2.36598	-0.48587	-0.174348	0.0640105	1.64148	-3.45846	-0.851292	-4.12494	-0.236211	0.401618	-2.86304	4.12789	-0.987466	-0.789254	0.362092	-4.21796	-3.58038	-1.5438	1.50069	-0.752711	4.59693	-2.67562	-0.583797	0.336383	-2.07446	0.747282	-0.656835	2.2353	-3.40579	-0.424042	-1.45619	0.440386	-3.34915	3.16585	0.424892	2.13132	0.499979	-2.12761	1.86721	-0.842606	-1.30078	4.63996	1.29594	-0.845602
TCGA-JW-A5VL-01	0.816546	-1.11875	-1.94472	-4.9073	-1.23599	-1.98907	-0.351584	-1.69297	-1.13915	1.55548	-2.95603	-2.37439	-1.08645	0.0273066	-0.914222	-0.486138	1.50257	-2.86354	-2.81931	-1.77933	-2.0781	-4.54743	0.469888	1.12203	-3.85258	2.97084	-1.02118	-1.89898	-2.11538	-3.07636	2.14034	-0.961754	0.594776	-2.90336	-1.85234	-2.29361	-2.2271	-0.676786	1.11515	-2.88793	1.22282	-0.504545	-1.62517	0.503783	-3.62557	-0.0207403	4.22306	-0.0607617	-1.06139
TCGA-JW-A852-01	-0.600877	-1.41353	-0.260587	-4.13517	-0.992351	-3.63455	-0.186284	-1.86694	-0.280358	2.11896	-5.14207	-1.26825	-1.72837	-0.50525	-0.970355	-1.76904	4.34675	-1.42398	-2.33466	-0.313294	-3.29389	-3.33438	-2.08539	2.05368	-5.40786	4.21289	-2.01458	-0.153613	0.350657	-3.00836	0.881926	-0.370189	3.24908	-4.70411	-1.84574	-0.275776	2.27135	-0.670183	1.77335	-1.08992	2.65874	0.362655	-1.75607	0.57305	-3.29704	-3.01414	6.26075	0.791039	-1.8797
TCGA-JW-AAVH-01	1.74822	1.10131	0.72097	-5.21457	-1.80629	-2.90332	-0.303752	-0.958416	0.900466	1.6011	-4.02382	-0.944688	0.544169	1.52271	0.255513	-2.37836	4.47812	-0.482748	-0.553109	0.0196086	-4.87079	-2.2332	0.337711	3.16682	-5.79212	3.40926	-0.743485	1.15716	-1.27064	-1.96077	1.68399	2.09244	2.66191	-2.11108	-3.20025	0.904282	0.524529	-2.06337	3.63509	-0.050144	1.74768	0.584121	-2.43251	0.691865	-0.922851	-0.117106	4.84336	2.04596	0.414112
TCGA-JX-A3PZ-01	-2.12136	-1.69043	-3.70916	-2.16095	-0.754675	-2.36628	-1.22614	-1.45614	-0.384347	0.539502	-2.00439	-2.63004	-4.10321	-2.08568	-2.74718	0.427167	2.58068	-3.34426	-4.07496	-0.697106	-2.21827	-5.69616	-0.762677	1.66764	-0.0294648	4.92441	-1.10335	-2.44681	-0.733595	-2.58879	-0.0827449	0.765803	-0.43848	-3.52157	-4.47056	-1.19758	-0.412361	-1.46493	0.486397	-2.71474	0.817599	-0.698265	-4.38089	-0.8959	-2.38581	0.820473	5.5666	0.819568	-1.38588
TCGA-JX-A3Q0-01	0.905032	-0.835896	-0.404246	-4.74196	-1.88865	-2.52513	-1.33364	-0.784435	-0.704119	1.34711	-2.64932	-1.87504	-0.405064	-0.588478	-0.245631	-0.925171	3.40489	-3.46373	-2.735	-0.794554	-3.44125	-4.3562	0.92673	2.10681	-0.755917	2.17425	-1.9433	-1.84382	-1.39364	-2.50663	2.00675	0.438058	0.17516	-2.66704	-2.86757	-2.0609	-2.24233	-1.4469	1.30497	-0.988887	-0.003906	-0.860807	-3.51487	0.26279	-2.83344	-0.161497	4.89518	0.792369	-1.91534
TCGA-JX-A5QV-01	1.89067	-3.03921	-1.22202	-3.25372	-0.380995	-5.24558	0.232426	-2.15125	-0.574587	0.553286	-2.2506	-0.978826	-0.282075	0.354033	-0.524423	1.80579	2.79191	-2.39759	-3.61639	0.362192	-2.59507	-3.95749	0.128003	3.53687	-2.8225	2.87352	-1.26572	-4.01799	0.309936	-1.29897	2.88135	0.463559	2.16382	-2.56919	-1.64942	-1.56712	-0.176185	-1.95573	1.19777	0.0239402	2.11606	-0.462089	-2.00722	1.26902	-2.68569	0.334183	4.34649	1.17533	-1.53965
TCGA-LP-A4AU-01	0.0407989	-0.686965	-2.17963	-2.30483	0.0561426	-3.36282	-0.720179	-1.15202	-1.88096	-0.0838174	-1.84286	-0.167145	-0.559183	-1.02332	-0.411141	-0.209827	2.81943	-1.6303	-1.52718	-1.00177	-3.10789	-3.95573	-0.384819	1.4889	-0.278153	3.15215	-1.70994	-1.9653	-0.922778	-2.45979	-0.351362	0.838528	1.30195	-2.07754	-3.14517	-1.3692	0.176064	-2.23907	1.08535	-1.66397	0.125917	-0.97491	-3.69936	0.332436	-3.15286	2.29524	4.81446	0.211101	0.358339
TCGA-LP-A4AV-01	-1.35876	-4.03139	-3.03862	-3.26004	-0.646733	-5.33729	-1.62224	-1.62483	-0.418024	1.41887	-3.38538	-1.02614	-1.78882	-1.81568	-1.15793	1.1011	4.77179	-1.68194	-1.17561	-0.0831534	-0.697423	-4.09226	-4.78813	1.85428	-1.43818	3.9006	-1.64694	-2.71738	-0.00416511	-2.58182	0.81661	0.693779	1.71796	-3.79214	-0.493203	-0.427506	2.27643	-1.19118	1.18377	-0.400344	2.21445	-0.248943	-2.16604	-1.41223	-5.51436	-0.909528	5.75729	-0.703389	-2.44495
TCGA-LP-A4AW-01	0.013469	-1.64635	0.271013	-0.859877	-1.22517	-2.55232	-0.900774	-0.581433	-0.577304	0.839924	-3.09832	-1.24809	-1.2738	0.612138	0.28797	1.44145	3.65804	-1.01365	-2.07152	-1.54611	-2.3303	-2.92719	-0.185001	1.7239	0.147537	1.98748	-0.409454	-0.987693	-1.65977	-1.66627	0.925197	0.625102	1.64902	-3.74053	-0.649498	-2.1535	-0.508457	-2.3911	2.60483	-0.77019	0.950807	-1.19733	-3.62899	1.4176	-1.65539	1.10864	5.59311	1.16404	-1.08193
TCGA-LP-A4AX-01	-0.47159	0.0546921	-2.99318	0.496187	0.935303	-2.81381	0.326332	-1.35433	0.187428	0.853465	-1.03308	-1.4926	-0.652619	-0.363277	0.288813	1.20592	2.85187	-2.34432	-0.326089	-1.52314	-0.906801	-2.68426	-0.538825	2.67732	-3.38067	3.92463	0.291583	-1.34414	0.773075	-2.72315	2.4181	0.38754	0.622141	-2.60653	-2.59616	-0.604462	0.42962	0.360564	1.59177	-1.02476	1.49206	-0.145791	-0.292367	0.200398	-2.88396	1.89841	5.23301	2.84597	1.59815
TCGA-LP-A5U3-01	1.07341	-2.1785	-2.09513	-5.11313	-1.75732	-1.87297	-1.33982	-1.96389	-0.518568	1.28296	-4.42488	-0.895716	-1.02097	-0.157343	-2.26524	-0.318503	2.53622	-3.84697	-3.34064	-0.663223	-2.68188	-4.5468	-0.613317	0.817002	-3.88332	2.18005	-1.05708	-1.12753	-1.41431	-3.19842	1.66653	-0.315135	-0.0530525	-3.09211	-1.86177	-1.04822	-0.973494	-2.37697	1.37589	-3.01284	-0.420064	0.221613	-1.9685	-0.799652	-3.28707	0.351704	5.0871	1.22899	-1.86974
TCGA-MA-AA3W-01	-0.646668	-1.43813	-0.749037	-3.12483	-1.27998	-3.2701	-0.382215	-1.81544	0.562528	1.33887	-2.31819	-0.833417	-2.22997	0.324763	-0.354947	1.20736	3.03879	-2.74403	-2.7258	-0.463421	-2.53712	-3.5585	-0.261511	2.90355	-3.36534	3.17524	-0.679283	-0.713384	-1.2589	-1.03955	0.713877	0.953615	0.734185	-3.1538	-1.29543	-0.852168	-0.937667	-0.308411	0.968996	-0.899006	0.374755	0.85889	-2.52769	0.301786	-2.7691	0.742626	5.03498	0.380676	-1.91119
TCGA-MA-AA3X-01	1.58447	-1.82839	-3.30511	-3.85613	-2.72914	-4.39733	-1.21571	-1.60825	-0.799992	2.55642	-4.13932	-1.06018	-1.96726	0.217392	0.964337	-3.36833	1.52133	-2.54933	-2.61202	-0.295196	-1.66435	-1.93366	0.0393512	0.776317	-2.00072	3.66691	-2.29194	-1.17878	-1.80117	-3.58528	-2.03484	0.674381	1.07534	-2.98147	-2.1231	-3.17204	-1.64986	-2.79554	1.74392	-2.02624	1.75002	-1.26834	-3.35536	0.0538023	-2.4369	0.371469	3.53131	-2.17282	-1.53146
TCGA-MA-AA3Y-01	-2.36713	-2.52674	-3.33757	-3.41697	-2.2982	-3.77375	-1.3165	-2.45033	-1.15189	-0.489453	-1.25447	-3.65899	-1.78425	-0.805879	-1.08808	-2.52235	0.74437	-1.70336	-2.60142	-2.10457	-2.48823	-5.14015	0.23484	0.778411	-0.426048	0.899856	-1.90282	-1.42514	-1.59263	-2.35836	-0.557111	-0.0646066	-1.37433	-2.96557	-2.41205	-1.89638	-1.15181	-2.37841	0.341965	-2.48066	0.401621	-0.72722	-5.14682	0.351157	-1.31855	-1.16541	5.11092	0.450763	-1.78012
TCGA-MA-AA3Z-01	0.664009	-1.42833	1.06694	-3.07439	0.148971	-2.73423	0.106347	-2.11863	-0.93398	1.67232	-4.58968	-0.782977	-0.437598	0.380906	-0.235465	1.7082	2.3411	-0.993151	-2.96486	-0.480094	-3.22365	-3.36367	-0.348574	2.15562	-5.99297	2.48871	-1.18827	0.116457	0.315101	-2.89859	0.78224	0.682128	1.30905	-2.99644	-1.48599	-0.129301	-0.735223	-1.3153	1.95495	-0.926567	0.503198	-1.45324	-1.92976	1.55798	-1.96377	1.10857	4.94539	1.59731	-1.52371
TCGA-MA-AA41-01	-0.752419	-1.04653	-1.6422	-3.81124	-1.15587	-5.14598	0.431561	-1.43352	-0.43	1.30058	-3.91654	-0.557298	0.0492543	0.287854	0.259974	0.989219	3.12346	-2.07559	-2.00222	0.960597	-3.261	-1.96807	-0.227593	2.26032	-1.62162	2.83777	-0.416102	-1.42654	-2.39782	-2.27504	1.08592	0.300124	0.72737	-2.23827	-2.54982	-4.99109	-0.546071	-1.85614	1.22127	-1.642	2.45823	0.63751	-1.55969	0.350238	-0.698561	-0.364584	6.22899	0.635672	-0.221218
TCGA-MA-AA42-01	0.857642	-2.0109	-3.7551	-4.96003	-0.400687	-3.63873	-0.798154	-2.68526	-1.05174	0.286668	-3.05879	-1.78701	-1.3273	-0.0155815	-0.332611	2.79257	2.95834	-2.12777	-3.42458	-0.445996	-0.876009	-3.20928	0.250274	2.38291	-2.71161	1.28465	-1.8329	-1.78178	-0.305607	-2.32255	0.788187	1.24033	1.17008	-5.31598	-1.95511	-1.19843	-0.453858	0.0219529	0.914385	-3.19364	1.36758	-1.03581	-4.68987	-0.984971	-1.95782	0.204067	5.29121	0.802524	-1.22854
TCGA-MA-AA43-01	-0.194379	-2.15452	-0.60982	-4.50419	-1.20283	-4.89338	-0.550304	-1.93991	-1.20616	0.760146	-1.33482	-1.04166	-1.99699	-0.0863675	1.95667	2.62413	1.93216	-1.98649	-2.02715	-3.63925	-3.93801	-2.08542	-1.53687	2.37619	0.48812	-0.0854776	-2.98064	-0.621398	0.19463	-2.73192	1.31941	-0.468035	0.702437	-3.06813	-1.54234	-1.24663	1.01732	-0.352991	0.611372	-1.20036	0.990937	0.0880497	-3.35956	1.45315	-1.82252	-0.802655	4.3527	0.76158	-1.29055
TCGA-MU-A51Y-01	2.10424	-1.23628	-2.10519	-3.97402	-0.565745	-3.62625	-0.605101	-2.52523	-1.38209	0.623278	-3.36824	-1.39602	0.0235013	0.231645	0.186331	0.795068	2.98272	-1.25888	-2.84094	-0.0695517	-1.7127	-4.57762	0.0767101	2.56888	-2.74422	1.30451	-1.9359	-0.113258	-1.03009	-1.14832	-1.05731	-0.724465	0.874708	-2.62543	-1.44513	-0.59361	-0.215817	-0.392192	1.73014	-0.503086	0.372239	-1.85983	-2.88384	-0.962574	-2.31789	0.538476	4.89826	1.22762	-1.38598
TCGA-MU-A5YI-01	2.30455	0.25225	-2.76899	-3.19472	0.0078481	-2.1964	0.481455	-1.70458	0.507388	1.67011	-3.64733	-1.5291	-1.50329	1.26758	0.718758	-0.00819358	0.847792	-2.32929	-2.34599	0.0383775	-2.29992	-2.17201	-1.53621	3.28759	0.0230584	2.08313	-1.48693	0.415247	-1.3372	-0.947279	1.05062	1.27099	1.8811	-2.2951	0.0596901	-1.51543	-0.355816	-2.50149	3.3395	-0.0376046	1.71149	0.347633	-1.669	0.212918	-1.40261	0.557138	5.9165	1.5827	-1.01502
TCGA-MU-A8JM-01	-2.65396	-2.9596	-0.841597	-3.52636	-0.397064	-3.86111	-0.605496	-1.84727	-2.13672	1.54042	1.25586	-2.37196	-3.71961	0.119932	-0.822527	2.68037	0.750115	-0.960649	-4.30231	-2.7769	-4.88302	-2.38746	0.286303	0.246946	-4.21939	1.3883	-2.60372	-1.33584	-2.37598	-3.04291	-0.799134	-2.12925	0.234633	-2.48589	-3.26495	-1.64732	-1.37668	0.910604	0.448914	-3.26402	0.573175	-1.58012	-4.34521	0.256597	-2.25391	0.366351	4.96543	0.592217	-1.81677
TCGA-MY-A5BD-01	0.821245	-0.985953	-1.32593	-2.23065	-0.2483	-2.11289	0.0813288	-0.890231	-0.39059	2.58215	-3.56152	0.0607605	-0.608811	1.67447	-0.811267	5.80029	3.79296	-2.26489	-1.96912	-0.443712	-4.96487	-2.59032	-0.420772	1.64572	-5.8862	3.1398	-1.505	-0.563368	-0.779761	-0.942382	1.41541	1.15813	1.79609	-2.63813	-0.972406	-1.37303	-0.628452	-2.98058	3.00211	-0.967353	1.26893	0.53734	-1.74899	0.798371	-1.92072	1.05184	6.25889	2.36823	-1.53702
TCGA-MY-A5BE-01	0.862943	0.173315	-1.98825	-3.39249	1.08885	-3.8488	0.40682	-1.09934	-0.460176	1.35477	-1.78863	-0.897542	-2.45164	0.774355	0.146908	3.34104	3.72986	-0.665197	-1.16189	-0.527545	-0.807698	-2.70063	-0.714677	3.40502	-1.78561	0.888719	-1.30283	-1.01071	0.377414	-1.4282	0.667675	1.80022	2.33199	-3.91836	-0.930708	-1.21585	-0.00179151	0.426767	1.9965	-0.378167	1.94806	0.982393	-0.865989	0.452513	-3.24826	0.186649	5.79488	-0.900259	-1.73139
TCGA-MY-A5BF-01	-0.761017	-1.16287	-2.97628	-5.14057	-3.24419	-3.64935	-0.609458	-3.65935	-1.693	1.43903	-3.51944	-0.880088	-2.2708	0.437053	0.0400055	1.9746	2.33112	-2.74888	-4.41247	-1.06263	-3.21182	-1.69382	-0.387471	2.28984	-4.89215	2.61313	-1.71388	-1.17383	-2.90118	-2.52775	-1.9284	1.01325	-0.824901	-2.75955	-2.76368	-1.55585	-1.01291	-3.48051	0.635444	-0.789214	0.437019	-0.0788457	-3.64802	-0.394132	-1.0656	0.0235299	5.50765	-1.27283	-2.68592
TCGA-MY-A913-01	-1.12175	-0.271843	-0.692671	-2.38802	-1.25276	-5.05024	-0.665335	-1.70974	-1.23345	0.485599	-1.20903	-2.39116	-2.18861	-0.809803	0.262613	2.47062	1.90084	-2.26364	-2.18401	-2.38106	-2.65429	-1.7889	0.982738	2.1938	-4.82355	1.01401	-1.55253	-0.0879338	0.140872	-2.19043	2.67858	-0.0191653	1.9379	-2.45446	-3.45407	-2.22291	-0.395875	-1.12651	0.865453	-2.21282	0.956076	-2.44731	-1.64194	0.213152	-0.273107	0.150117	4.46312	0.14006	-0.51929
TCGA-PN-A8MA-01	1.05667	0.186681	-0.658835	-4.28498	-0.694703	-4.59171	2.27124	0.402785	0.0760164	3.10601	-4.09923	-0.418064	-1.50267	2.30639	-0.206877	-1.30218	4.13975	-2.00675	-1.66135	0.286917	-2.12177	-0.911297	0.12737	2.08019	-2.55767	3.38612	0.579768	-0.62941	-0.258585	-2.07071	-2.60774	2.11743	2.23816	-2.33036	-0.995551	-0.642398	0.477686	-1.81999	3.01776	-0.263974	1.06313	0.898735	0.00100555	2.63661	-3.30935	1.25109	4.18799	1.19313	1.39962
TCGA-Q1-A5R2-01	1.21102	-0.869033	-1.38521	-4.17627	-0.92898	-2.67117	-1.27116	-1.30852	-0.580678	1.22555	-3.00036	-1.26002	-0.972079	-0.656018	1.59684	2.23489	4.04528	-2.0711	-1.5123	-0.664961	-1.77108	-2.32615	0.512702	2.83951	-1.06306	5.0089	-1.64378	-1.52158	-0.338045	-1.14571	-0.180234	0.597398	1.34657	-3.72187	-2.23547	-2.85731	0.265777	-2.73234	1.04509	-1.26455	2.79662	0.219876	-1.12894	1.32377	-3.5112	1.49356	5.09155	1.28555	-1.3569
TCGA-Q1-A5R3-01	-0.489565	-4.23846	0.157394	-1.67325	-3.40225	-1.9661	-3.55179	-1.38445	-0.907501	1.18961	-2.42415	-1.29272	-0.396435	-0.924332	-0.885195	2.78935	3.5215	-0.258966	-0.0313702	-0.0507639	-3.78492	-3.69988	-3.67328	1.70728	-0.0519374	3.13436	-2.70201	-2.15355	0.748116	-2.45103	0.498503	-1.40311	1.45827	-2.36917	-1.40389	-0.897617	-0.448497	-4.79057	0.535602	-1.99307	1.49196	-1.65194	-2.22111	-0.073021	-2.86899	0.620361	6.31953	-1.80153	-3.56713
TCGA-Q1-A6DT-01	-1.72794	-1.26306	-0.120387	-0.962175	1.33919	-3.35137	-0.773826	-1.80556	-0.929119	1.24659	-1.286	-2.82158	-0.146855	0.105703	-1.82324	-0.659403	2.26436	-1.45607	-0.137218	-0.249236	-3.52528	-1.33311	0.23341	1.62136	-1.0543	1.00908	0.104517	0.41538	0.303683	-1.3209	1.72007	1.39841	1.63301	-1.98131	-1.75521	-0.763514	0.811137	-0.612075	1.53693	0.386506	0.708522	-1.58495	-2.50205	1.05322	-1.94348	-0.245536	5.27518	1.71234	0.507807
TCGA-Q1-A6DW-01	-0.0861018	-2.39381	-2.5486	-5.15852	-4.97263	-2.96275	0.270148	-1.60119	-0.940104	1.18662	-3.71538	-0.941104	-2.99924	0.0100758	-0.420814	2.44346	0.818404	-2.69971	-5.55595	-1.38668	-4.49281	-3.27026	-0.223767	0.976434	-0.981176	2.70865	-2.15692	-2.29221	-4.62962	-2.97462	-2.17142	-2.06096	0.150919	-1.93955	-3.55923	-1.63793	-3.47831	0.173022	0.474892	-1.93269	-0.259	-2.68176	-1.07529	0.512513	-4.13982	0.786942	4.7129	0.941242	-0.518609
TCGA-Q1-A73O-01	-1.0137	-2.04889	-2.72053	-3.94288	-2.17204	-2.3548	-1.38298	-2.12776	-2.25116	-0.569736	-3.27736	-1.40354	-2.19865	-1.20314	-0.248771	1.38517	1.28196	-3.19868	-4.17039	-1.58609	-3.69221	-4.28909	-1.12114	1.96569	-1.80619	1.35847	-1.5332	-2.82604	-2.82903	-3.08476	-0.271287	-0.86805	0.400499	-1.69644	-2.75864	-1.33483	-0.870364	-1.33797	0.996912	-2.39513	0.027021	-0.421729	-1.71079	-1.55902	-2.75426	0.0381982	5.53393	-0.406262	-0.663152
TCGA-Q1-A73Q-01	0.761289	-1.30757	-0.959706	-4.25061	-0.640227	-3.13285	-0.462191	-1.27495	-0.210833	0.505087	-3.9034	-1.16565	-1.62877	0.381234	0.221887	-0.997643	2.63825	-2.28485	-2.85158	-2.24128	-3.11036	-2.40865	-0.553941	2.31382	-3.40366	3.39591	-0.805063	-0.0597637	-1.57733	-2.50291	0.288536	0.469381	1.34932	-1.73209	-1.72933	-0.551683	-0.911444	-0.146389	1.87441	-1.57227	1.36445	0.98945	-0.996357	1.83952	-2.50256	0.616846	4.96229	1.08602	-0.135148
TCGA-R2-A69V-01	1.04047	-0.437165	-1.53751	-2.95394	0.656439	-4.42114	-1.07806	-1.61352	-1.05827	0.728224	-1.86258	-0.868982	-1.01018	-0.507211	-0.686562	0.684676	2.04184	-2.45767	-1.84442	-0.359649	0.202606	-5.05058	-0.171545	2.86521	-1.40004	2.94476	-0.993823	-1.7017	-0.503053	-2.31518	-0.227712	1.06561	1.03717	-4.68335	-2.82498	-1.03743	-0.236267	-0.316849	1.04203	-1.80612	2.04814	1.14525	-1.24989	0.37464	-3.42829	1.25455	5.72251	0.601031	-1.03403
TCGA-RA-A741-01	1.1175	-0.73955	-2.9332	-4.28562	0.00879377	-3.50489	0.940555	-1.29766	-0.123941	1.60141	-2.3977	-2.33124	-0.16792	0.179957	-0.692304	-0.215356	3.47266	-2.78242	-2.51313	0.521841	-1.60198	-3.63183	-0.122839	3.07475	-1.97442	2.52541	-0.00717869	-0.425546	0.351802	-0.952405	0.122946	1.83984	1.30393	-2.30766	-1.15384	-1.12117	0.503111	-0.379532	1.01617	-1.60036	2.04686	1.16842	-2.05353	0.27958	-2.43403	2.37134	5.52851	-1.31459	-0.786572
TCGA-UC-A7PD-01	-0.82457	-0.836126	-1.9861	-2.85138	-0.768584	-2.6807	-0.246746	-1.37182	-0.161364	0.642831	-1.51729	-1.90698	-2.56657	-0.807101	-1.19405	-4.5777	-0.273005	-1.96515	-2.93687	-0.80002	-3.32118	-2.93358	0.46602	2.15191	-0.625127	2.67514	-0.0683494	-1.28318	-1.5955	-2.00323	1.69197	-0.326401	2.56091	-2.54698	-2.63203	-1.28188	-0.122264	-3.32683	1.55964	-1.78309	0.822427	-0.255317	-1.47727	0.774045	-1.37778	-0.837899	4.74257	1.06076	-1.24779
TCGA-UC-A7PF-01	0.653091	-0.27107	-2.2898	-6.42809	-0.956806	-3.64736	0.415608	-1.80937	-1.49281	0.924094	-4.248	-0.795644	-1.93383	0.165804	-0.953426	1.95149	0.834229	-4.79937	-5.24057	-0.0712981	-1.85549	-1.8394	-0.144011	3.01814	-1.34386	3.13017	-0.372049	-2.19095	-1.72928	-2.40647	-1.7565	0.611975	1.33451	-2.32461	-3.24385	-1.10015	-3.16293	-0.44071	0.218139	-2.03234	2.17186	0.633629	-1.58303	0.0553082	-2.57651	0.750025	5.51387	1.38289	-0.271937
TCGA-UC-A7PG-01	0.824504	-3.12726	-1.29799	-4.307	-3.92847	-4.59666	-0.341048	-0.832673	-0.669177	0.092327	-2.49538	-1.60744	-0.495653	0.670904	-0.255905	-0.982699	0.703863	-2.132	-4.92683	-1.92749	-3.96322	-2.74068	-0.845873	1.42498	-1.28252	2.34874	-3.00585	-1.08367	-2.26354	-2.62707	-1.47518	0.568157	0.832506	-2.1808	-3.15251	-1.59377	-2.11223	-2.44233	1.18201	-2.15157	1.16367	-0.730709	-1.55469	0.542525	-3.63623	-0.0313979	4.47679	-0.699728	-0.813254
TCGA-VS-A8EB-01	-1.42278	-2.02607	-3.25054	-6.16001	-0.330269	-4.37928	-0.423225	-1.82857	0.190312	-0.201901	-2.97991	-2.52756	-1.62728	-0.0332393	-1.44539	0.51597	3.86857	-2.11625	-2.65056	-0.835637	-3.4943	-2.65508	0.285353	2.26252	-0.282232	2.22833	0.463075	-1.26905	-1.30919	-1.61184	1.06413	1.08729	0.102882	-3.4191	-0.178259	-4.63942	-0.392345	-2.14006	0.993969	-2.05972	1.15454	0.446033	-2.07678	-0.0599377	-2.44087	-0.421004	4.9925	1.21155	-1.32188
TCGA-VS-A8EC-01	0.18624	-0.831031	1.58676	-2.92916	-1.99481	-3.20732	-0.214742	-1.7579	0.122852	1.4171	-4.21235	-1.77064	-2.82878	0.194213	-1.47274	2.81289	-3.01113	-1.82881	-3.80053	-1.12311	-4.64427	-1.04091	-0.62842	3.40816	-4.75825	2.40028	-0.0144714	-1.049	-0.211233	-1.53857	2.92978	1.72421	2.09229	-3.35406	-0.388772	-0.0751468	0.692148	-3.77546	2.31913	-0.25973	2.1131	0.774108	-2.84343	1.99218	0.388196	0.442831	4.35618	0.354065	-0.820216
TCGA-VS-A8EG-01	-0.28985	-1.89692	-1.75625	-5.3137	-1.35021	-2.29593	0.0852151	-1.72975	-0.294842	1.15528	-2.91711	-1.90364	-0.560126	0.530015	-0.0207838	1.59055	3.85304	-2.43344	-2.93353	-1.58369	-4.87038	-1.28794	0.54868	1.27958	-5.79171	2.52647	-1.10565	-1.57358	-1.30676	-2.81932	-2.10842	0.790279	0.965987	-2.43261	-3.57424	-0.556072	-1.15545	1.3665	2.12916	-1.22281	1.07124	-1.05933	-1.76697	0.795305	-2.5174	0.45667	4.00139	1.22848	-1.6786
TCGA-VS-A8EH-01	1.0162	-1.91331	0.859485	-4.40049	-0.307711	-2.13433	-0.13148	-0.988216	-0.142713	2.62272	-3.05689	-1.18308	0.26283	1.08904	-1.73317	-0.561007	3.80525	-1.3211	-0.28696	-0.414529	-3.20871	-2.83416	0.83629	3.01856	-1.28037	2.34015	0.229794	0.678224	0.976403	-1.12444	1.25174	0.208029	2.1489	-2.34591	-0.53817	-0.647236	1.29764	-2.83739	1.95851	0.161621	1.71315	-2.33876	-1.87735	0.00384333	-1.14147	-0.850957	4.63021	2.4874	-0.508773
TCGA-VS-A8EI-01	-0.185873	-1.24037	-0.188706	-3.97336	-0.478149	-2.54627	0.446312	-1.65581	-1.3174	0.44257	-0.638755	-0.957585	-3.75269	0.0565064	-0.0962572	-1.95023	3.28735	-2.45316	-1.91708	-0.799092	-2.48072	-2.47117	-0.260147	1.82203	-3.16758	1.64971	-0.752824	-0.0209977	0.902333	-1.44976	2.41244	0.740181	1.75111	-2.89094	-0.727717	-2.16898	0.291802	-0.451438	1.34036	-1.14182	1.16813	-0.528311	-1.44541	1.63033	-0.645336	-0.172955	5.11834	2.08763	-0.69832
TCGA-VS-A8EJ-01	0.849157	-0.411787	-2.13457	-2.3958	0.353347	-4.0962	0.528648	-0.936283	0.0536769	1.22762	-3.72926	-3.24448	-2.1327	1.45883	-0.38859	3.92085	4.77241	-2.24821	0.340342	0.0324041	-2.21122	-2.31061	1.22554	3.34548	-0.309822	3.78971	-1.66888	1.23991	0.459316	0.14898	0.989312	2.05351	4.8992	-2.24293	0.236923	-0.812022	1.95302	-1.2049	3.10731	1.62812	2.26544	-0.592817	-0.562379	0.721947	-3.53631	-0.931474	5.1888	1.28313	-1.0388
TCGA-VS-A8EK-01	-0.557797	-1.96738	-2.65269	-4.31705	-0.780671	-2.61032	0.0412211	-1.00531	0.0855373	1.28165	-3.11785	-1.30609	-0.320753	0.702281	-1.62117	2.94389	4.01742	-2.27329	-2.6441	-1.01915	-3.0098	-1.37221	-0.426452	0.637324	-4.46164	1.84582	-0.665399	0.462097	-1.3552	-1.20554	0.664884	0.4698	0.467961	-1.44803	-2.17463	0.167011	0.27004	-2.4491	2.8996	-0.858568	0.796587	-1.25533	-2.90939	0.329847	-1.78739	-0.55602	6.04106	1.25804	0.159623
TCGA-VS-A8EL-01	-0.391313	-0.875448	0.0550462	-2.70155	-1.13234	-3.44439	-1.60381	-1.20646	-1.33247	1.44006	-1.52564	-1.27074	0.854105	-0.854293	-0.910105	-0.197292	1.18921	-1.09389	-2.30062	-1.90074	-1.35777	-2.81749	0.462322	2.46623	-1.31885	1.96618	-2.1166	-1.72494	-0.448296	-2.32902	0.598484	0.427026	2.18385	-3.38467	-3.43319	-0.931937	-0.638023	-0.553088	0.716414	-2.67736	1.69825	-0.748356	-2.96501	1.13712	-2.8141	-1.27966	6.04216	0.21753	-0.665699
TCGA-VS-A8Q8-01	-0.144961	-0.909948	-0.406987	-4.13408	-0.225734	-5.09032	0.280773	-2.13685	-1.81491	1.31473	-2.86088	-0.653639	-1.58625	-0.661817	-0.735589	-1.26546	2.16476	-1.65736	-1.94656	0.0382857	-1.62038	-4.43025	0.121801	1.9179	-2.29885	4.23416	-1.24797	-2.86273	-0.641718	-2.21938	-0.29899	0.781092	2.45546	-3.47806	-3.07912	-2.7655	-0.490409	-0.283414	0.164456	-1.10091	1.73628	0.413064	-1.14146	0.339666	-3.53042	0.867956	4.21591	0.958618	-0.93859
TCGA-VS-A8Q9-01	1.29319	-1.92375	-4.77898	-5.01038	1.36533	-2.22965	0.948796	0.0457448	0.242155	1.11079	-3.56725	0.0814988	-0.465049	0.0168537	-0.0700507	-1.19067	3.32409	-3.09215	-2.15989	-1.23855	-4.08164	-1.42911	-0.24309	1.86999	-0.86001	6.86708	-0.316907	-3.30162	-1.31156	-1.70865	0.319109	0.641761	-0.633833	-1.86737	-3.4111	-3.48979	-1.74522	-2.27422	1.56163	-4.04759	2.21106	1.46638	-1.0584	2.46095	-3.53225	0.982382	5.59756	0.709104	0.519164
TCGA-VS-A8QA-01	-0.254425	0.647027	-0.184357	-3.56514	-0.751222	-2.30524	0.234169	-1.76842	0.875267	2.48944	-4.52897	-2.97708	-2.23726	1.03711	0.796548	1.47632	-3.04765	-1.17345	-1.77815	-1.15963	-2.59333	-2.72128	1.603	1.96543	-6.28019	1.30103	-1.26398	0.52291	1.17675	-1.17609	-1.32126	-1.02013	2.56025	-2.33612	0.637722	-0.565381	1.27034	-0.139548	2.94103	-0.576353	0.77541	-0.740455	-0.377442	0.559436	-2.00587	4.9841	4.31967	2.18116	0.103956
TCGA-VS-A8QC-01	-0.0635055	-2.85496	-2.54027	-3.20463	-1.31831	-4.00887	0.355276	-1.56601	0.0702151	0.954575	-3.70903	-0.697714	0.528634	0.151787	-0.0348192	0.342066	3.89468	-2.35351	-2.5146	-2.33969	-2.95396	-1.57941	-1.03344	1.98241	-4.38986	3.02143	-0.816012	0.238317	-0.427812	-2.08347	0.689357	1.0222	0.756879	-2.68611	-1.05515	-1.62515	-0.617539	-2.13405	1.85344	-1.35432	2.12784	1.00005	-0.837612	0.936663	-1.14154	-0.0367819	6.02929	1.45046	-0.183635
TCGA-VS-A8QF-01	0.138354	-2.04062	-0.948319	-3.36475	-0.318272	-2.92506	-0.328408	-1.33099	-0.130277	1.67105	-2.55811	-2.6583	-1.0241	-0.0847292	-0.117549	-0.673666	2.11913	-2.66203	-2.51826	-1.25589	-2.22451	-2.8369	-0.0929703	1.83995	-3.65107	2.80603	0.131419	-0.527545	-0.328901	-1.59106	-1.67805	1.11423	-0.338012	-2.84623	-3.23579	-1.00463	-0.540162	-0.548335	2.07756	-1.1774	0.719793	-0.303031	-2.56116	1.00275	-1.87974	0.296251	4.38691	1.48927	-0.199367
TCGA-VS-A8QM-01	1.4428	-0.556598	-1.10063	-5.07619	-0.189866	-2.79296	-0.132954	-1.01268	-0.0904404	0.831733	-2.83336	-0.941242	-0.581932	0.895431	1.34601	0.500254	3.29305	-2.36946	-3.01419	0.34334	-1.03197	-3.09483	0.551376	2.32002	-1.723	1.98638	-1.19007	-0.06787	-1.73994	-1.55207	-0.311485	0.77625	1.33278	-2.8207	-1.58382	-0.585975	-1.39599	0.751116	1.67269	-1.00906	1.20184	-0.277503	-1.47213	0.94878	-2.73556	0.547339	5.27205	1.18171	-0.719591
TCGA-VS-A94W-01	0.478081	-1.25985	-2.79861	-6.43055	0.633076	-2.57943	0.743297	-1.01828	-0.867071	1.52385	-2.77883	-0.120032	-2.66032	0.247988	1.32422	1.42357	0.224439	-3.12376	-3.10552	-0.65872	-1.15131	-1.23196	1.04501	2.05988	-3.07264	2.29559	-1.00838	-0.91127	-3.05366	-2.98362	-1.34392	-0.211984	0.703795	-2.27976	-2.12766	-2.42454	-0.679961	0.56864	1.05657	-2.35673	1.14703	-0.520833	-1.56346	0.760668	-4.14882	1.2286	4.81518	0.832075	-0.0231392
TCGA-VS-A94X-01	-2.4707	-2.72571	-1.3692	-5.99291	-1.4851	-2.54922	-1.0821	-1.78923	-1.12942	1.07211	-3.39778	-2.94543	-0.678363	-0.762466	-1.56007	1.9346	1.64697	-1.28619	-1.0328	-1.04051	-3.47921	-3.61923	0.395865	2.23448	-0.0313049	2.36439	-0.784868	-1.49274	-1.46402	-1.37492	0.596219	-0.647434	0.33924	-3.88943	-1.61603	-1.47233	-0.612274	-2.02543	0.335638	-1.76709	0.807064	-2.51616	-2.04093	1.61702	-1.5819	0.630614	4.09596	1.39315	-0.544057
TCGA-VS-A94Y-01	-1.9225	-0.267794	-3.72789	-1.79606	0.19238	-3.27167	-1.27909	-1.94064	-0.783714	0.392898	-2.16776	-2.00491	-2.35256	-1.31512	-1.32235	-1.03177	2.76582	-2.17856	-3.0348	1.31504	-3.29358	-6.07103	-2.89244	2.24302	-0.375706	3.44431	-1.16628	-3.04408	-1.78654	-1.5162	-0.287693	-0.016246	0.625531	-2.53388	-1.93854	-2.53181	0.364769	0.869856	0.626097	-2.29606	1.0557	-0.160601	-2.75577	1.47313	-2.5312	1.46729	3.69722	1.32401	-0.986314
TCGA-VS-A94Z-01	0.362835	-0.686857	-4.76448	-6.99588	-0.225035	-4.80012	-0.296572	-1.50269	-0.717351	0.799221	-2.63521	-1.48896	-2.25165	0.598014	0.62252	0.786031	2.82234	-2.83664	-3.58596	-1.13094	-1.56464	-1.53879	0.619406	2.24143	-3.08158	2.45257	-0.694726	-2.18021	-2.46699	-2.48393	-0.324287	0.686633	0.859834	-2.15543	-2.88203	-1.4164	-0.993753	0.239081	0.679836	-3.54767	0.697181	0.69033	-1.30693	1.20512	-1.33333	0.875574	4.71821	1.28548	-0.559849
TCGA-VS-A950-01	-2.31849	-2.55405	-2.39805	-4.41186	-1.08848	-1.78314	-0.638553	-1.19753	0.144349	1.36518	-2.23819	-1.10134	-0.6941	-0.0660992	0.550192	-2.07162	3.5889	-1.88267	-1.8093	-0.781387	-3.58266	-4.05199	0.0772206	-0.162744	-4.06341	4.67738	-1.84767	-2.55555	-0.117437	-2.2716	0.328594	0.221742	1.24222	-2.71277	-1.48243	-2.99081	-0.0535902	-1.5212	1.44981	-2.771	0.843795	-1.08711	-3.58916	0.427681	-1.62763	0.859364	4.07743	1.09588	-0.535257
TCGA-VS-A953-01	-0.372195	-2.13558	-4.72778	-6.02957	-1.17126	-3.78941	-0.135244	-0.388482	-2.06654	1.00069	-0.611706	-0.352728	-1.45936	-0.83241	0.0971733	-2.48287	0.373613	-3.98581	-4.84204	-2.9947	-4.51586	-0.715052	-0.999245	1.56866	-1.98873	2.95899	-2.68402	-3.11436	-4.91572	-5.23034	-1.94294	0.956726	-0.003929	-1.98749	-3.65268	-1.46459	-1.59448	-1.23201	0.127399	-4.21878	-0.130056	0.0321516	-3.07759	0.518483	-1.31739	-0.361647	5.73735	-5.7024	-1.45838
TCGA-VS-A954-01	-0.250375	-3.38243	-1.3022	-3.82521	-0.0543592	-4.10337	0.181993	-1.50457	-1.07053	2.6341	-5.3885	-0.444296	-2.48382	0.356842	0.43091	1.18616	2.06245	-2.4253	-2.69657	0.504404	-2.63343	-1.41088	-0.817249	1.43017	-4.65429	3.64313	-0.413018	-0.945042	-2.35521	-2.58237	-3.70436	2.30092	1.55658	-4.14319	-1.92225	-2.36351	-0.88197	-2.42358	1.06435	-0.289043	2.21705	-1.08541	-3.00251	2.03226	-2.40597	1.13175	5.31524	0.639465	-1.10567
TCGA-VS-A957-01	1.50659	-0.541936	-3.44447	-5.26084	-1.90503	-1.89515	1.13306	-0.296342	0.345499	2.16676	-3.5282	-2.62839	0.547529	1.45372	0.784986	1.04075	2.84536	-0.895146	-1.75138	-0.489005	-2.74713	-2.17095	0.113442	2.781	-4.9315	3.60082	0.017599	-0.112966	-0.56202	-0.938044	-1.1742	0.509141	1.65628	-1.57239	-1.56202	-0.570323	1.00433	-1.29335	1.93154	-0.334574	1.01719	0.800885	-0.794282	1.53484	-0.487252	1.06313	5.20993	0.423882	0.327843
TCGA-VS-A958-01	-1.14147	-0.787619	-1.53182	-5.87425	-0.177406	-3.24553	-0.574873	-1.38106	-1.57236	1.53722	-3.22253	-0.563732	-2.45194	0.106162	0.182626	0.257407	2.45316	-2.34506	-3.2013	-1.16131	-1.94551	-2.17042	-0.656842	1.82859	-0.122678	2.15327	-1.98813	-1.74492	-2.49736	-2.45835	-3.10955	0.393225	0.93039	-2.28534	-4.23433	-1.67559	-1.34605	0.12494	1.70669	-2.64843	0.0818456	-0.812531	-1.88163	1.49927	-2.89208	-0.180334	4.68742	1.08518	-1.07565
TCGA-VS-A959-01	2.39919	-0.532278	0.513713	-4.16205	-1.87663	-3.18868	0.236862	-0.427855	0.688767	0.714526	-3.11124	-0.249497	0.23426	0.900256	1.80224	3.78186	1.81487	-2.22521	-1.32245	0.124352	-1.39681	-1.94365	-0.14767	2.96682	-0.863963	1.77123	0.00417358	-0.761416	0.536764	-0.960723	-1.50426	0.520462	0.648148	-2.05857	-1.2002	-0.590838	0.383219	-0.33896	1.98593	-0.458183	1.60818	-0.322724	-1.36535	1.28658	-3.19582	5.1816	4.42446	1.84961	-0.0278464
TCGA-VS-A9U5-01	-0.546109	0.126881	0.960448	-3.11895	-1.93307	-4.33822	-0.497643	-1.4607	-0.0714247	2.1337	-2.97128	-2.07146	-1.66422	0.840015	-0.0366013	0.200336	3.37104	-1.01629	-2.05696	0.603972	-2.31574	-0.629793	0.835426	3.13799	-3.99606	0.962724	-1.11735	1.2381	-0.420134	-0.25124	1.53653	-0.0213979	0.85706	-1.54154	-1.0051	-0.935397	1.20511	1.88806	2.66903	0.24983	0.333105	-1.64219	-2.97432	0.501954	-0.576691	-0.0803842	5.52525	1.25261	-0.402809
TCGA-VS-A9U6-01	0.0477987	0.418558	-1.57256	-3.57395	-0.803106	-4.71922	0.462392	-2.08768	-0.624729	2.33061	-2.87625	-1.18943	-1.21515	0.0503172	-0.73503	1.75272	2.29459	-1.97076	-0.852994	0.119876	-2.98625	-2.898	0.67793	1.91909	-4.11403	2.45481	-2.12841	-0.321707	-1.00759	-1.64183	1.04086	0.384197	1.69515	-2.25897	-1.6901	-0.111467	-0.749362	0.62673	2.0126	-0.426132	0.709902	-1.9528	-1.54797	1.19757	-1.36024	1.30944	3.96949	1.91468	0.397385
TCGA-VS-A9U7-01	1.82302	-0.00289679	-1.09785	-2.95793	0.142221	-5.14068	0.316572	-1.40222	0.219768	2.3257	-3.32627	0.170473	-1.6366	-0.484297	0.296805	0.493186	3.13873	-1.29268	-1.80788	-0.749037	-1.95704	-2.33716	-0.555898	2.71554	-3.42857	3.55041	-0.742507	-0.2322	1.32995	-1.45164	-0.671275	0.978339	0.303138	-3.02438	-2.77898	-1.43734	0.109292	0.355123	0.927013	-0.591247	2.50418	0.926911	-1.81331	1.93495	-2.68548	-0.262254	4.90413	0.387613	-0.637377
TCGA-VS-A9UB-01	-0.0464064	-0.299754	-1.52422	-3.31822	0.337154	-1.71437	-0.338454	-1.49304	0.574425	0.608248	-2.83856	-1.06428	-1.77965	0.49314	0.963353	3.92892	2.87713	-0.331036	-2.3717	-0.983789	-4.50495	-3.2824	1.14412	2.32804	-0.519389	1.52934	-0.608974	0.218484	-1.58287	-2.75999	1.64087	0.3643	1.14639	-2.33021	-2.31984	0.0565223	-1.43156	0.0268306	0.946948	-2.4709	1.01836	-1.14958	-1.48171	0.512051	-3.415	1.9268	4.70409	1.23925	-0.220052
TCGA-VS-A9UC-01	2.89562	-2.04889	1.70954	-4.37302	-1.52818	-2.93333	0.824786	-1.35837	0.212797	1.88465	-1.92148	-0.740574	-0.088218	0.365556	0.594798	-0.19161	2.75685	-3.11776	-1.30414	-0.126652	-1.99177	-3.24727	-1.33687	2.60396	-3.85865	1.55265	-1.09098	-0.313422	-0.259168	-1.86752	-0.570843	0.816453	1.20306	-2.40199	-1.92213	-2.39992	-0.355786	-1.23843	1.67271	-0.968862	1.16609	-1.0998	-1.43193	1.27297	-3.1104	1.15233	4.09809	1.64286	-0.947877
TCGA-VS-A9UD-01	0.694474	-0.911034	-2.23021	-4.1232	1.0462	-3.8019	0.208603	-0.767512	-1.40311	2.60183	-3.0615	-1.14283	-2.83839	-0.438985	-1.14978	-0.281045	0.30118	-1.63198	-2.58775	-2.13273	-0.69969	-1.55687	1.27082	3.15834	-0.200177	3.49429	-0.696511	-1.74142	-1.88381	-2.61347	0.136272	1.38529	2.46377	-3.06411	-1.74631	-3.06204	0.267497	0.0222838	2.53804	-1.26934	1.57992	0.479092	-0.0456851	0.993881	-1.80904	1.25035	4.8793	1.65143	0.0572765
TCGA-VS-A9UH-01	-0.500232	-0.216957	-3.03742	-3.75425	-0.398442	-3.97352	0.123396	-0.813603	-1.418	1.25236	-0.429383	-0.619303	-2.29952	-0.467017	-0.364474	-0.748123	2.41906	-2.83602	-2.15169	-0.98242	-0.410471	-3.018	1.17058	1.35932	-1.40106	1.53893	-1.5462	-0.88795	-1.90343	-2.69868	-0.252581	0.201282	1.94422	-3.82069	-1.26189	-3.4967	-0.266695	-0.219728	0.574301	-2.41295	0.408297	-0.0295649	-3.87266	0.248523	-1.64809	-0.715685	4.01461	-0.105156	-2.60201
TCGA-VS-A9UI-01	1.14334	-0.766413	-0.462946	-5.63546	-2.60157	-4.17665	-0.220598	-1.49736	-1.51877	0.191057	-2.92929	-1.73997	0.382704	-0.00159856	0.56791	1.23317	3.19945	-3.91362	-2.18489	-1.50748	-4.02864	-3.39106	0.62043	1.53305	-0.637086	2.46133	-0.983801	-1.3641	-0.673603	-2.09926	0.164874	-0.274868	0.419166	-2.8539	-3.99553	-2.43679	-1.69222	-1.9899	1.26955	-0.873579	-1.3798	-0.725736	-3.49083	1.15051	-2.76876	-0.333854	3.94267	-0.170784	-0.936387
TCGA-VS-A9UJ-01	-2.62678	-1.85704	-1.99607	-4.10718	-0.783787	-2.64837	-0.807795	-0.73238	0.251527	-1.534	-1.59111	-0.681177	-0.87128	0.507445	0.429351	0.205057	-0.229791	-0.648375	-2.01918	-1.24223	-4.08532	-3.7473	1.07071	1.86631	0.355292	2.59447	-1.80602	0.133806	-1.31525	-1.32406	1.22637	-0.161625	2.79787	-1.49554	-0.68298	-3.49348	0.71053	2.52496	1.86727	-0.115817	-0.629124	-0.0454529	-2.69951	1.02188	-1.45621	0.00178107	3.75599	-4.10194	-1.30857
TCGA-VS-A9UL-01	-0.581176	0.433903	-1.22429	-4.46596	-1.69511	-2.32266	0.463468	0.0458436	1.10732	2.19055	-4.41515	-0.392941	-1.34466	1.2287	2.09721	3.04487	4.03003	-1.5857	-1.44193	-1.01606	-0.236049	-3.18343	-0.271006	2.54896	-0.926053	3.11118	-0.387198	0.114382	-0.159462	-1.23887	-0.299158	0.316089	2.97472	-0.847906	-0.0890728	-3.75273	0.451279	-3.8908	2.22162	0.361897	0.552197	-1.04167	-0.0412269	2.64527	-1.14609	0.904801	3.33395	1.62371	0.715112
TCGA-VS-A9UM-01	0.0455606	-1.55995	-0.424224	-4.23154	-3.4607	-4.12889	-0.288307	-0.267048	-0.214574	1.76759	-2.71041	-1.27717	0.561056	0.21035	0.0445782	0.741419	1.60336	-2.48734	-1.87409	-0.196677	-1.98087	-1.73448	-1.44223	2.36669	-2.83181	2.52702	-1.43853	-0.468335	-0.532726	-2.01727	-0.14491	0.258327	1.04313	-1.66863	-2.53273	-0.710954	-0.265939	-0.733545	1.73917	-2.09883	1.04648	0.0781063	-1.83899	0.711289	-1.34248	0.479449	4.57212	1.40851	-0.49434
TCGA-VS-A9UU-01	-0.65654	-2.70262	1.11032	-3.20429	-0.558975	-3.42356	-1.05247	-1.23193	0.0141195	0.453309	-1.70869	1.20075	-0.804009	0.117951	0.850751	-4.24256	1.74225	-2.04505	-1.2798	-0.33935	-4.86051	-1.73107	-0.652013	1.95172	-1.92386	1.67385	-0.73321	-0.173603	0.131956	-1.87454	0.619308	2.28558	1.48542	-3.10081	-1.95293	0.0888873	-1.20216	-1.0375	2.33601	-1.104	2.28019	0.179359	-2.64463	1.53545	-1.93767	0.534715	5.47718	0.604003	0.124827
TCGA-VS-A9UV-01	-0.55683	-0.632517	-1.70687	-6.59362	0.292705	-4.07593	0.0276885	-1.50097	-2.07182	1.15234	-3.58345	-1.54613	-2.24992	0.235765	-1.18934	1.4974	2.6687	-2.54986	-2.29062	-0.728678	-2.92791	-1.38344	-0.356843	0.739269	-4.84924	2.32759	-1.29246	-2.77794	-1.7428	-3.37935	-1.09195	0.0274955	1.62118	-3.49014	-3.21673	-2.65799	-1.59149	-0.0590953	1.9694	-2.49333	1.4434	0.741121	-1.78603	2.15948	-1.28952	0.904379	5.38598	0.763296	-0.538676
TCGA-VS-A9UY-01	-0.0521907	0.00105983	-2.26921	-4.24364	-2.72072	-2.71084	-0.062903	-2.87285	-0.422603	0.547463	-3.411	-1.15868	0.706128	0.102331	-0.976257	-0.774944	1.57282	-1.86284	-2.13411	-0.793734	-2.75547	-1.94796	-1.57672	2.5072	-4.39669	3.51211	-2.02048	-1.06539	-1.57036	-2.54938	-0.86888	0.0978402	0.554834	-1.54678	-2.30732	-0.613425	-1.64144	-1.30169	0.524311	-1.35885	0.255946	0.214012	-4.34694	0.778431	-2.30294	0.301888	3.85747	-0.0146508	-1.12818
TCGA-VS-A9V2-01	1.72493	-0.0349718	-0.483578	-4.76651	-0.548204	-4.12329	1.11418	-0.852334	0.688178	0.946611	-3.09475	-0.893054	-1.18625	0.89445	0.217474	-0.725048	4.25082	-1.93425	-2.03842	-1.96868	-2.83777	-1.82673	-0.574128	2.92221	-3.36055	2.1235	-0.295429	-1.50338	-1.79016	-1.58541	0.469501	0.814126	0.621912	-1.49797	-2.84905	-1.24592	-1.37582	1.04735	2.42348	-1.09323	1.30584	0.295212	-2.17442	1.00162	-4.62228	0.68299	4.5459	0.00811671	-0.16681
TCGA-VS-A9V3-01	0.961609	-1.23885	1.55698	-4.30311	-3.2327	-2.22282	0.354723	-1.72186	-0.688677	0.897975	-2.73034	-0.464212	0.389778	0.755488	-0.429348	3.14306	3.15328	-2.0529	-2.23106	-0.231719	-2.26745	-2.97779	-0.0887025	1.9143	-0.826212	2.43753	-1.53247	-0.682347	-1.56777	-1.66	1.23689	-0.414145	1.90225	-1.62705	-2.0417	-1.57607	-0.153424	-1.34801	1.88859	-1.87084	0.0334674	-0.241389	-0.688999	0.595327	-1.44569	0.204941	4.94949	1.33484	-0.600085
TCGA-VS-AA62-01	-0.637768	-1.06597	-1.72213	-1.78717	-0.867184	-2.27234	-0.765185	-2.12623	-1.78721	0.249689	-1.13876	-2.00558	-1.40569	-0.558082	0.359429	-1.31373	1.33889	-2.2317	-2.6729	-1.41052	-2.19471	-4.70914	0.928894	2.12958	-0.765547	2.29525	-1.65238	-1.12418	-1.52418	-1.10183	0.296599	-0.440943	1.18598	-2.3419	-0.82057	-1.16991	0.40474	1.19766	1.11538	-1.36158	0.380128	-1.57631	-3.7158	-0.361081	-2.5198	2.24423	5.10882	0.091235	-0.788801
TCGA-WL-A834-01	-1.06098	-4.66218	0.0505401	-4.10496	-1.19661	-2.5587	0.03572	-2.00081	-0.768715	0.354341	-4.45324	-0.706979	-2.89416	0.315629	-0.037112	-1.9733	2.00946	-2.2132	-1.84705	-1.51755	-4.17622	-2.73128	-0.424579	0.960446	-4.83451	3.65716	-1.54077	-1.10569	-1.31304	-2.45773	-0.907297	0.68189	0.0137887	-2.15348	-2.59057	-1.51398	-0.991801	-4.3074	1.55903	-1.29418	1.00868	-1.36517	-1.58182	1.26336	-4.82323	1.86906	4.79836	1.69469	-0.458361
TCGA-XS-A8TJ-01	2.3654	-1.24915	2.15886	-2.69739	0.0734605	-2.63912	0.316933	-0.450634	0.165215	0.91392	-4.29865	-2.30198	0.00245581	1.00351	-0.206572	-1.61012	3.57053	-0.76728	-1.1967	-0.832445	-2.81304	-1.8179	0.246317	2.81548	-0.876386	1.92486	-1.7682	-0.303008	0.0159304	-0.988353	1.04529	0.823378	1.65915	-2.09398	-0.90546	0.978481	-0.154688	-0.794475	3.45496	0.951648	1.9019	-1.51013	-4.59715	0.13851	-1.43768	0.0516736	5.36303	1.02833	-0.328467
TCGA-ZJ-A8QO-01	0.261677	-0.450319	0.0366211	-4.15362	-1.64581	-3.78793	0.0526465	-2.27856	-0.845946	0.7543	-3.10783	-0.199247	-1.13185	0.745322	1.21413	1.31591	1.88219	-0.717544	-2.4636	-1.58824	-1.60039	-1.57235	0.000690264	2.07377	-0.16893	1.20368	-0.898271	-0.250486	-0.232414	-1.50195	-0.803956	0.528892	2.22838	-1.01061	-1.45481	-0.633035	-0.303497	2.89502	1.88513	-0.245977	1.16093	-0.354936	-2.27203	1.27672	0.0449828	0.63983	6.1586	1.21794	0.491863
TCGA-ZJ-A8QQ-01	0.454976	-0.513716	-2.73507	-6.39944	-1.36555	-2.69271	-1.04116	-1.62152	0.350787	1.60239	-3.49396	-1.62948	0.170771	0.153362	-0.493337	-2.26778	-2.42252	-2.77071	-1.67586	-0.36457	-3.20766	-1.74565	0.0514648	2.2057	-0.504497	2.57999	-0.587318	-1.01956	-0.285582	-0.952507	0.701552	1.453	1.59663	-2.55899	-2.43758	-2.61581	0.713725	-3.11645	0.734045	-1.85169	0.24854	0.095245	-2.76938	0.462476	-1.79578	-1.19094	5.21184	1.53654	-0.821222
TCGA-ZJ-A8QR-01	-1.69722	-1.67046	-0.208427	-5.58201	-1.15909	-3.80128	0.553872	-1.08882	-0.107157	0.822502	-1.42966	-0.850025	-1.89511	0.322369	-0.894233	-1.52074	2.83548	-1.30121	-2.03191	-1.61753	-4.13869	-3.17918	0.760701	2.59181	-4.5746	3.08463	0.541149	-0.841885	-0.575069	-1.59013	2.44143	-0.183287	-0.0459823	-2.54892	-1.84255	-3.54685	-1.1242	-1.42188	1.44792	-1.99362	1.47362	-2.00571	-5.24474	0.152931	-2.53778	-0.59591	5.17726	1.35566	-0.667928
TCGA-ZJ-AAX4-01	1.26319	-1.6615	-0.781209	-4.74813	0.455673	-2.9674	0.966284	-0.696453	-0.914386	2.07432	-2.79686	-0.978181	0.8072	1.21527	-0.0381769	0.149061	3.66841	-2.21894	-0.597133	0.589296	-1.89339	-2.33381	0.237104	3.09377	-1.9129	3.67956	-1.27705	1.58931	0.68765	-1.11433	-1.98343	0.860382	1.46177	-2.74419	-1.99273	-0.0576193	-0.345466	-0.717914	2.11354	-0.352385	1.46172	-0.00833943	-1.22499	1.1575	-0.793976	0.360823	4.7969	1.84956	-0.51657
TCGA-ZJ-AAX8-01	0.445823	-1.66187	-1.43618	-5.12702	-0.356172	-3.76133	0.346732	-1.28591	-1.47451	0.19913	-2.22932	-0.757605	-1.87259	0.0470575	0.65577	1.0921	1.33103	-3.20879	-2.35453	-1.17461	-1.97588	-2.19146	-1.09669	1.94283	-1.29518	2.09905	-1.57793	-0.851912	-3.01316	-2.49771	-0.521011	-0.570034	0.205136	-1.6085	-2.63465	-1.33341	-0.987386	0.0628571	0.313743	-2.6788	0.772496	-1.19083	-2.66046	0.836072	-3.10832	0.159475	4.16831	1.24454	-0.854484
TCGA-ZJ-AAXA-01	0.532464	-4.26222	-1.39372	-4.11265	-1.78659	-2.85917	0.45873	-0.474435	-0.608213	3.17657	-5.54727	-2.63548	-2.29281	1.11479	0.297502	-1.62608	2.49273	-2.09864	-2.14752	-0.470103	-3.15476	-3.37968	-0.782767	0.811977	-0.481544	2.67434	-1.67132	0.104325	-0.0589185	-2.20931	-1.00846	1.69662	2.03524	-2.78258	-1.85862	-1.50633	-0.417804	-4.22936	2.52914	-0.109222	1.24254	-0.206209	-5.58274	1.17558	-2.31635	0.637634	4.25301	1.07148	-0.508096
TCGA-ZJ-AAXD-01	0.183178	-1.69074	-2.00408	-5.54291	-1.45014	-3.44025	0.400325	-0.242366	-1.36339	1.5974	-2.87739	-1.58853	-2.67314	0.748116	0.889936	0.0481803	2.73779	-2.49915	-3.77042	-0.508044	-3.61417	-3.27615	0.568335	1.6745	-0.950535	2.23335	-2.33486	-1.42607	-3.42906	-4.15872	1.28788	-0.538467	2.23219	-2.32395	-2.16602	-1.70039	-0.470392	-1.938	1.16578	-0.410197	0.204601	-0.159261	0.555913	0.509333	-3.93925	0.724474	3.69663	0.6669	-1.08134
TCGA-ZJ-AAXF-01	0.843773	-1.3207	0.0163599	-3.91548	0.00736796	-3.49732	0.0802213	-0.676609	-0.991133	-0.283417	-3.28864	-0.752519	-0.671319	0.673632	1.22576	2.21618	1.9576	-2.45668	-1.99099	-1.31358	-2.45622	-3.51908	-0.170559	2.52432	-0.702954	1.24019	-0.951361	-0.225338	-0.801627	-2.78368	1.93669	0.503999	1.6772	-3.75953	-1.80163	-1.24289	-0.820243	-0.243454	1.2325	-1.21573	1.53657	-1.02369	-1.77085	1.57325	-4.48175	-0.291953	5.17339	0.6168	-0.496726
TCGA-ZJ-AAXI-01	-0.0467207	-0.808348	-0.00822703	-4.12945	-0.8611	-3.62883	1.95899	-1.45523	-0.135235	0.97936	-4.48427	-0.496998	1.73678	0.407361	0.432256	1.98084	2.73729	-1.78083	-1.63707	0.0909757	-3.7032	-2.95014	-1.18658	3.20996	-2.10097	3.19048	0.599947	-2.53616	-0.781126	-1.69886	0.405777	2.16605	1.34406	-3.23896	-2.51809	-2.23689	0.296182	0.591877	1.26019	-1.29065	2.64608	1.05427	-0.399857	1.05309	-3.61325	-0.786025	6.13093	-3.56781	-0.289022
TCGA-ZJ-AAXJ-01	0.121319	0.467881	-0.852573	-2.64363	-0.00402472	-4.38646	1.11708	-2.54847	-1.19048	1.35101	-2.80652	-1.36482	-0.507345	0.469054	-0.573878	-1.16106	2.03855	-2.53846	-1.73173	-1.54736	-5.23845	-4.0159	-2.13686	3.84464	-4.98985	3.67779	0.040858	-2.87347	0.406097	-0.97564	1.75739	1.80073	2.58913	-3.18924	-5.7903	-3.6466	0.90533	-1.32524	2.56575	-1.4178	2.56014	-1.10547	-1.70063	1.06753	-1.97857	-2.22173	4.68124	0.0426218	-0.324191
TCGA-ZJ-AAXN-01	-2.27595	-1.93037	-1.37212	-3.7457	-1.53428	-3.18736	0.224757	-1.99573	-0.276365	-0.479468	-1.1977	-2.01372	-0.379507	-1.08748	-1.07839	-2.4828	1.78142	-3.33937	-2.78057	-0.488441	-3.45439	-4.6648	-0.0836179	2.48453	-0.146898	3.67944	-0.274618	-2.07713	-1.53231	-2.05338	1.41132	-0.0125585	0.472586	-2.27965	-2.78385	-0.556733	0.171541	-1.15558	1.0609	-1.49434	-0.0212721	-0.790893	-3.82347	-0.541916	-2.27697	0.625063	6.34618	0.86687	-1.07263
TCGA-ZJ-AAXT-01	-2.49237	-2.68645	-2.01482	-4.61162	-1.46881	-4.91836	-0.66274	-1.02147	-1.27039	0.0925632	-2.42588	-0.481674	-2.65939	-0.0748146	0.401187	1.32335	0.365297	-2.95488	-3.51156	-2.92725	-3.31091	-2.51805	0.0231182	1.80373	-0.858781	1.78571	-1.64304	-1.78387	-3.58523	-3.72993	-0.206459	0.231358	0.484819	-2.37321	-4.73723	-4.59353	-0.974489	-3.09417	0.519285	-2.3858	0.922896	-0.0524004	-4.55446	1.0373	-2.23744	-0.551994	5.25238	0.866488	-0.067591
TCGA-ZJ-AAXU-01	0.0199258	-1.6087	-2.26006	-4.93284	-1.32245	-3.49315	0.315012	-1.47458	-1.02509	0.240135	-3.55001	-0.963354	-2.34137	0.296503	-0.477829	0.365932	1.20555	-2.38211	-2.90578	-0.145898	-2.72846	-2.05985	0.00710189	1.60143	-2.6035	3.21522	-1.29465	-1.97277	-0.744982	-2.73768	-0.149273	-0.0388177	0.75872	-2.85489	-1.16002	-1.66018	-0.160713	-0.668961	0.921412	-1.70701	1.85625	1.0307	-1.64382	0.560652	-1.5771	-0.603039	5.93922	0.685562	-0.389695
TCGA-ZJ-AB0H-01	0.750273	-1.48529	0.529848	-2.22446	1.49486	-2.69165	-1.43604	-1.32315	-1.33283	-0.551749	-3.46221	-2.10297	-0.795261	0.401501	-0.624499	2.79769	3.20498	-0.691655	-1.78236	-1.80009	-1.80667	-2.58413	0.715484	1.74503	-0.900185	1.31556	-1.17123	-0.509866	0.226434	-2.03572	-0.0831871	0.210132	0.882139	-2.53883	-0.873102	-0.536757	-1.47025	-0.0309684	1.58889	-0.47397	1.56463	-2.41066	-1.21228	0.148521	-2.75325	0.151146	5.24047	1.35729	-1.17128
TCGA-ZJ-AB0I-01	-2.51883	-0.796151	-1.49023	-3.09429	-0.870929	-4.56149	0.120394	-1.91614	-1.16269	1.54481	-1.96048	-2.70977	-1.88749	-0.367448	-0.909369	-1.47359	2.60049	-2.4911	-1.56973	-1.30735	-3.82851	-2.96853	0.526829	1.79803	-2.10598	3.89027	-0.932535	0.0712461	-0.768929	-2.95802	-0.533116	-0.959261	0.574901	-2.65377	-2.26489	-1.12119	-0.269697	-1.18711	1.14917	-1.41595	1.04273	-2.28049	-2.19759	0.757857	-3.03812	-1.13372	3.96549	0.792307	-1.08418
TCGA-ZX-AA5X-01	1.65746	-0.710545	-1.54785	-3.40486	-0.119441	-3.01645	-0.301401	-1.44149	-0.0889625	1.32674	-1.96938	-0.994805	-0.784453	0.219409	0.914528	1.5177	3.55478	-1.22985	-1.8023	0.559616	-2.409	-2.90892	0.260628	2.65545	-1.61984	2.50417	-0.518742	-0.881968	-0.875969	-1.58291	0.252929	0.055262	0.512256	-1.88634	-2.42029	-1.02866	0.0529481	-1.35576	1.42119	-1.57136	1.42426	0.264543	-1.33062	0.768016	-2.38616	0.470207	4.53741	1.08458	-0.140594
TCGA-C5-A1M9-01	-2.00798	-0.793075	-1.14351	-3.82863	-2.77399	-3.484	-0.186567	-2.51108	0.0715144	1.07873	-2.20862	-2.54982	-1.64113	-0.965931	0.918001	1.83836	3.51347	-2.35424	-2.99474	-0.902292	-3.25353	-2.07162	0.281471	2.28588	-6.17486	2.75301	-0.608096	-2.00403	-0.150878	-0.228034	-0.6806	-0.96924	1.59834	-2.51175	-2.88784	-1.74414	-0.839104	-0.467174	1.15685	-1.91692	0.225391	-0.203011	-2.88564	0.546243	-1.79434	1.80272	5.75687	1.05179	-0.900149
TCGA-C5-A1ME-01	-0.341557	-1.55949	-2.32279	-4.04856	0.243123	-3.62146	0.0789374	-1.09542	0.592546	1.51422	-0.94136	-0.295813	-1.24292	0.590277	0.417122	3.66807	4.25029	-1.67037	-2.38459	0.432375	-2.25106	-3.19844	-1.43488	2.4866	-0.404833	3.92874	-0.0712889	-0.0599717	1.3231	-1.17794	1.1351	0.358325	1.62112	-3.88367	-1.7358	-3.7296	2.46123	2.80287	2.32808	-1.64585	2.77365	1.27096	-1.62014	1.43066	-3.06157	-2.36363	6.55103	0.340013	-1.65804
TCGA-C5-A1MJ-01	-0.72712	-0.730225	-2.23417	-4.2364	-2.88059	-2.70078	1.2918	-1.03271	0.750479	1.97547	-2.9188	-1.35602	-2.78167	1.16398	-0.0708345	4.52886	1.88007	-2.02271	-1.46391	-1.46457	-2.22019	-3.02622	-0.206072	2.56096	-0.693708	2.76727	-0.957961	-0.45329	-1.80061	-1.89285	-2.30177	-0.305954	0.928647	-2.29161	-2.27455	-0.857827	0.488198	-0.0294479	2.14808	-1.33815	0.589117	-1.00475	-2.09177	-0.0378353	-1.54527	0.910694	5.48172	3.03621	0.44485
TCGA-C5-A2LS-01	0.4345	-0.218314	0.467474	-3.62688	-0.101141	-3.03879	0.38675	-2.78576	0.7843	1.00003	-3.18374	-0.60211	0.125535	0.692275	-0.194029	4.72718	4.23269	-1.12368	-1.91579	-0.592009	-3.89078	-2.81262	1.8063	3.05542	-4.16003	3.16687	-1.04032	-0.525798	-0.120703	-1.40138	0.932246	0.413192	2.33464	-1.93843	-1.60613	-0.748734	-0.191786	0.932234	2.64626	0.271373	2.03817	0.479241	-2.08993	0.782525	-3.43825	2.23506	4.20964	2.23167	-0.0295297
TCGA-C5-A2M1-01	-1.27669	0.155274	-2.7111	-5.10824	-2.53902	-2.85107	-1.04086	-2.6673	0.226164	2.23073	-1.70038	-2.09246	-2.76203	0.392782	0.468473	2.36611	2.67155	-1.47951	-2.44427	-1.85997	-1.3455	-3.63921	1.25268	2.60056	-4.16495	2.39424	-1.19109	-0.898965	-1.61105	-1.92568	-1.9129	0.764962	0.455243	-2.35839	-2.25491	-1.25323	-0.157181	-0.539619	2.1499	-0.547995	0.560498	-0.712096	-2.67982	0.672632	-2.12125	1.7332	5.88103	2.10476	-0.697058
TCGA-C5-A2M2-01	0.0569844	0.321401	-1.65043	-5.18926	-0.915911	-1.34964	-0.0940192	-1.49254	0.181923	1.4872	-3.29156	-0.682341	-1.08003	0.774466	-0.570856	5.69951	2.95089	-2.82357	-1.88625	1.068	-4.03812	-2.56404	0.297132	2.55867	-5.95945	3.08743	0.321352	-0.673143	-1.66037	-1.64109	0.219303	0.930662	0.727859	-2.12642	-1.9379	-1.29944	-0.421594	1.99775	1.73833	-1.79351	0.503805	0.145482	-0.479847	0.678806	-3.26367	4.15537	4.75271	2.73782	-0.766164
TCGA-C5-A3HF-01	-0.15233	-1.70305	-0.768955	-4.66938	-1.133	-3.04066	1.0674	-2.12466	0.643334	0.600258	-3.01767	-1.55151	-0.978587	0.699047	0.314073	1.1553	1.78002	-2.55523	-1.71632	-2.08198	-2.67025	-3.56701	1.3498	2.49912	-0.496059	1.80244	-1.78327	-0.178861	-0.62953	-0.622225	0.839482	0.735597	0.903084	-2.30287	-0.570029	-1.2228	0.631404	0.534167	2.00216	-1.27364	1.07813	-0.406029	-2.32312	0.573883	-2.7438	1.57473	5.76209	2.15603	-0.648388
TCGA-C5-A7CM-01	-0.680458	-0.839428	-0.622581	-2.04302	-1.4421	-2.36182	1.75886	-0.655622	1.21575	1.09784	-3.50678	-0.37886	-1.39208	1.25932	0.019967	2.51962	3.86831	-0.0648428	-0.762381	-0.500004	-5.02116	-3.79862	0.286868	2.09758	-0.152417	5.94048	-0.604357	-2.61966	0.748909	-2.27621	-1.86327	-1.26739	2.38787	-2.10946	-2.35063	-1.92682	-0.0217788	-2.48938	2.97593	-0.354851	1.82408	0.774779	-0.0326913	1.97238	-3.02432	5.6014	3.79972	1.69316	0.524261
TCGA-C5-A7X8-01	-0.192479	1.3264	-0.0731546	-3.37495	0.525184	-4.00926	1.01895	-0.352503	-0.0281298	3.0709	-1.81634	-1.04206	-2.18325	0.799814	0.809642	0.966167	3.18694	-1.80762	-1.28053	-0.532725	-1.69132	-3.22366	0.397883	1.73324	-0.390253	3.56733	-1.48883	-0.000303677	0.131226	-2.54597	1.41213	0.21446	2.9558	-2.46411	-1.14008	-1.68443	1.84441	2.41697	2.54386	-0.93967	2.43146	0.544757	-1.23032	1.27303	-2.77129	-0.166455	4.10241	1.10197	-0.150078
TCGA-DS-A7WH-01	-1.18465	-0.509206	-1.9295	-4.29183	-3.84291	-4.24807	-0.933559	-1.27622	-1.08885	1.08131	0.814263	-1.98131	-2.86952	-0.392555	-1.13909	1.27279	2.69408	-2.11057	-3.61888	-2.57889	-3.51509	-2.29255	1.01991	0.826042	-3.2488	2.35954	-1.47971	-2.62816	-1.69255	-3.00717	-1.2052	-2.12389	-1.37472	-0.603387	-3.42952	-2.00571	-2.76363	-2.72874	0.00670744	-4.06601	-0.228819	-3.55204	-3.14721	-0.282363	-3.84018	3.29517	3.67158	0.520762	-0.78541
TCGA-EA-A4BA-01	0.925834	-2.21055	-2.05761	-2.32616	1.60295	-4.65396	1.93258	-0.846338	0.240364	0.203806	-2.3035	0.483165	0.792634	0.895563	2.22585	3.53197	-0.650412	-1.43673	-1.54672	-0.592464	-0.184014	-3.62043	-0.782872	3.11065	0.617122	4.35035	0.232793	-0.519475	0.679169	-2.60571	-0.178127	4.17857	2.06739	-3.21573	-2.0578	-2.45467	1.28991	-0.24481	2.59594	-0.208862	3.08542	1.87496	-0.73547	1.1191	-3.6611	-0.641231	5.50887	-0.0414285	-0.0411351
TCGA-EA-A556-01	1.79726	-1.90225	-3.33006	-2.0655	0.0532662	-2.57428	1.12612	-0.722993	0.278438	-3.04487	-2.47037	-1.72256	-1.21776	0.999799	0.864842	-0.0955956	0.943837	-1.72629	-0.293015	0.0542513	-2.6893	-4.05172	0.860232	1.84898	-0.762635	2.35321	-0.0842278	-0.0490098	-0.241156	-2.55578	1.12241	2.21286	1.876	-1.96202	-0.420126	-1.91688	-0.259772	-2.72738	2.62079	0.00466827	1.47892	-0.556323	-2.57295	0.84599	-2.11392	1.36538	4.9828	2.07836	-0.2669
TCGA-EK-A2RL-01	-0.350245	-0.00260148	-0.063623	-4.87012	0.631122	-2.79393	1.34342	-1.5409	0.670779	1.38755	-4.24899	-1.11214	-0.989462	0.926989	0.0214594	2.98368	4.6558	-0.530899	-3.14202	-0.151725	-1.7861	-3.90524	1.48415	2.76642	-5.32214	2.71121	0.048423	1.75157	0.871769	-0.970622	2.48228	1.86076	1.93186	-2.25644	-1.3677	-1.34953	1.36188	-0.566206	2.50493	-0.595931	1.41796	0.346883	-1.59996	0.441718	-2.33357	0.863836	5.08278	2.75418	-0.76718
TCGA-EK-A3GK-01	-0.130201	-3.29629	1.343	-4.909	-1.65272	-3.74976	-0.735148	-2.24297	-0.117954	0.913458	-5.95772	-2.79112	-2.03923	0.0236736	0.641936	2.4882	3.23785	-1.6022	-2.58397	-1.97367	-4.49483	-1.83171	-0.173118	3.46761	-6.22351	2.66352	-0.790217	-0.767277	-1.30971	-1.70377	-0.974366	0.206478	0.93412	-3.06855	-3.26907	-0.982415	-1.64383	-2.04105	1.21718	-1.17221	0.556115	-1.58424	-1.91637	0.0666849	-3.72037	3.85817	5.86177	1.64699	-1.17179
TCGA-EK-A3GM-01	-0.495783	-0.901134	-2.56081	-6.39764	-3.11222	-3.25434	0.689328	-2.06272	-0.603067	1.1507	-3.07381	-1.32462	0.603369	0.466578	-0.976971	-1.80032	2.83262	-2.16124	-4.43251	-1.11124	-5.27625	-3.02396	0.233412	2.50427	-0.916814	1.9686	-0.0520925	0.156469	0.335122	-0.577101	0.899557	-0.274555	-0.454991	-1.90512	-1.24315	-6.68441	0.867521	0.614928	1.38924	-1.25125	0.0164447	-0.619714	-3.73844	0.600331	-3.07778	1.56828	4.35025	2.26683	-0.573504
TCGA-EX-A1H6-01	-0.479132	0.332972	-0.456285	-2.84934	-0.0378557	-4.1979	1.35234	-2.08689	0.612231	1.26013	-2.12046	-1.09825	0.0476441	0.0808267	-0.989387	4.42993	4.23431	-1.3499	-1.62118	0.641201	-3.24253	-2.79759	-0.718005	4.19685	-3.3565	2.70687	0.192894	-0.51498	1.61096	-0.851469	2.46203	2.4983	3.37728	-2.87514	-1.9013	-1.87308	0.841125	-4.37371	2.89999	0.0926856	2.40631	1.14918	-0.494151	-0.715617	-1.98265	-0.355099	5.52265	1.40382	-0.322043
TCGA-EX-A449-01	0.348641	0.954221	-1.77867	-4.63066	-0.0524612	-3.26497	0.595507	-0.938693	0.651544	1.11886	-3.83389	-1.09132	0.037846	0.369805	-0.91024	1.55266	3.80569	-1.54251	-3.27321	0.404203	0.14357	-2.47937	-0.130852	2.40266	-0.546434	2.2799	-1.42262	0.132545	-0.124491	-0.709035	1.04093	0.80674	3.39498	-1.02468	-0.761921	-0.555485	1.65687	-3.66318	2.07497	-0.546859	0.531886	-0.0453792	-3.31611	-0.339907	-0.457147	-0.547702	4.85979	3.01165	-0.27747
TCGA-FU-A3EO-01	-0.216667	-2.49254	-2.42578	-2.41771	-0.926973	-3.26502	-1.46883	-2.94786	0.336066	1.34246	-2.67738	-2.5508	-2.22037	-0.810516	-1.13742	3.41656	-1.20633	-1.76097	-1.99572	0.617154	-1.76908	-4.03196	-2.17529	2.32695	-0.486534	2.42133	-1.53159	-1.8675	1.19364	-1.33671	1.70247	1.65307	1.41194	-3.1793	-2.2214	-2.17723	1.94981	-3.70762	1.7762	-0.497992	0.772851	1.17126	-2.36055	-0.160481	-5.31655	-1.42221	5.78828	-0.00808245	-3.04361
TCGA-FU-A40J-01	1.63402	0.820254	0.789277	-3.8074	-1.65804	-3.02667	1.81391	-1.08434	0.779454	1.8334	-4.27116	-0.211476	-0.418257	0.952188	1.82154	3.95459	4.44005	-2.5006	-1.81252	-0.509497	-2.74115	-1.563	0.755148	3.5003	-3.19118	2.52779	0.576972	-0.50262	-0.928009	-0.909433	0.32188	0.893039	1.58221	-1.82945	-2.36012	-1.39928	0.383765	1.24566	2.29292	-0.996612	2.01812	1.04092	-0.43011	1.26097	-2.77078	3.09039	5.16351	1.8272	0.572155
TCGA-FU-A57G-01	1.05505	-2.2456	-1.22899	-3.69997	-0.0253359	-2.22958	0.336378	-1.64313	-0.68428	1.77343	-1.53547	-2.02172	-0.380674	1.32766	0.990428	1.44712	2.37804	-1.02544	-1.60866	-2.3969	-2.5555	-2.91791	0.362222	1.90902	0.525677	1.37926	-0.768045	-0.812953	-0.540309	-1.49738	0.502859	0.700777	1.7059	-2.67621	-0.604849	-1.17938	0.365888	-0.430341	2.4893	-0.0884907	1.20882	0.214913	-3.18761	-0.0442306	-3.72858	0.0137594	6.11991	0.684231	-0.429295
TCGA-FU-A770-01	-1.13384	-0.646234	-2.36191	-4.95151	-2.64009	-5.63021	-0.851032	-2.33279	0.0424158	0.180631	-1.27975	-1.77849	-0.467923	-1.78667	-0.589822	2.17468	2.81391	-4.78221	-3.63845	-1.5016	-5.4822	-2.35276	-0.951771	2.35079	-4.81856	1.6802	-1.82438	-0.647732	-0.297085	-1.33869	-0.288682	-0.480497	-0.449429	-0.892419	-3.03405	-0.275641	0.761115	-3.80603	1.37511	-1.54126	-0.663428	-0.442327	-2.68135	0.0603884	-2.71982	-1.32798	5.3311	1.40004	-1.33932
TCGA-IR-A3LA-01	0.358819	-0.972471	-2.56955	-5.24619	-1.71635	-3.25901	-0.237859	-2.91287	1.00951	2.7176	-2.58596	-2.31418	1.07288	0.317645	-0.80683	6.95184	1.58488	-2.58094	-1.80491	2.25147	-1.97349	-2.95404	0.138144	2.35115	-0.180993	3.92329	0.048014	-3.89391	-0.584847	-0.366038	-0.722493	1.37974	2.51352	-2.14271	0.0152222	-0.902479	-0.222034	-1.72281	3.0998	-0.720806	1.58515	0.815532	-2.34257	-0.755409	-0.684758	0.886353	5.05372	2.43853	-0.209426
TCGA-IR-A3LB-01	0.489508	-0.375013	-3.32711	-3.01419	-0.426205	-3.81842	0.738365	-0.833588	-0.0387797	1.35101	-0.540842	-1.38174	-0.982149	0.0790589	-0.240942	3.86471	3.58164	-2.45585	-3.31209	-0.00240485	-3.01833	-2.8629	-0.110835	3.26212	-0.507308	4.75367	0.0342027	-1.74713	-2.97072	-1.95383	0.253018	1.64233	0.73943	-1.98109	-2.02962	-3.56399	-1.23445	-1.19956	1.49101	-2.09322	2.36091	0.721306	-1.4039	0.509855	-2.13042	1.23939	4.6143	1.21068	-1.22708
TCGA-IR-A3LF-01	1.01257	0.954826	-0.299383	-4.41654	0.41844	-2.45138	1.67608	-0.797816	0.842457	2.35516	-2.98805	-0.24352	-0.991251	1.53228	1.18022	5.89864	4.13162	-0.901469	-2.16488	0.456578	-2.08924	-1.41483	0.623842	3.21181	-2.511	3.52002	-0.182495	1.35394	0.367169	-1.09946	0.228586	2.016	2.09643	-1.22817	-1.25115	-1.14593	0.781513	2.30313	2.94444	-0.0955568	1.85136	0.740342	-1.97645	1.34079	-2.06286	0.835023	5.0298	2.69675	0.627691
TCGA-IR-A3LI-01	-0.38676	0.338988	-0.0617509	-2.481	1.37731	-2.45234	-0.235201	-1.92368	0.155802	1.03091	-4.88587	-0.526624	-0.401779	0.51715	-0.850214	4.18593	4.01162	-1.30795	-1.83404	0.290832	-3.55226	-2.78539	0.71925	2.34127	-6.15166	4.40938	-1.20256	-0.14625	0.880782	-1.82379	-0.101585	0.873941	1.80244	-4.15512	-0.974828	-1.25997	2.05095	1.18074	2.03155	-0.763324	2.02732	0.487612	0.0386664	1.12893	-3.55541	2.11981	4.18709	1.93363	-1.46
TCGA-JW-A69B-01	-1.17995	-2.10553	-5.58525	-4.2217	-0.221375	-2.6551	0.698127	-1.23857	0.123296	2.3923	-0.887615	-0.639882	-0.335449	1.39592	-0.187407	-1.6261	4.08953	-1.90664	-2.72223	-0.203516	-2.29296	-3.81292	0.0315604	2.87919	-3.39985	2.17191	-0.262829	-0.0106687	-0.717903	-1.06452	2.86741	0.533568	2.29686	-3.10173	-1.21094	-3.38917	0.857904	3.00443	3.0851	-1.56846	-0.109781	-0.433	-3.61313	1.08928	-0.228097	-0.50196	4.51045	2.15136	-1.12458
TCGA-JX-A3Q8-01	1.13002	-0.18604	-4.04127	-3.57047	0.700802	-2.68787	-0.847286	-1.43484	-0.407778	2.93451	-4.06986	-0.836146	-1.64322	0.372437	-0.353823	-1.9219	4.28251	-1.59886	0.104991	0.609341	-1.67735	-2.74699	-0.122406	3.83371	-1.03797	3.7243	-1.18393	-1.14492	0.273292	-0.899975	0.17653	1.44099	1.57405	-3.32204	0.608735	-0.476699	1.1185	-2.80854	2.05284	0.65535	1.14141	0.625549	-2.19844	0.0235241	-2.41747	-1.39761	5.34284	1.29396	-1.07053
TCGA-LP-A5U2-01	-0.122332	-2.12622	-3.61888	-3.61082	-1.22699	-2.59562	0.360433	-1.78188	0.21584	0.709136	-4.96564	-0.6064	-1.63212	0.552429	-0.584712	3.1726	3.05343	-1.52523	-2.26283	0.275185	-4.76954	-0.648139	-1.51041	1.48876	-6.1059	3.09547	0.337586	-0.490288	-0.883986	-2.02458	-1.07559	-0.371909	0.0517264	-5.17976	-1.3672	-1.37034	-1.26319	-6.90072	1.72396	-1.8286	1.7862	0.492724	-1.26825	2.34787	1.4638	0.569105	6.43151	0.798812	-0.153722
TCGA-LP-A7HU-01	1.40008	0.612352	-5.99777	-4.09989	-1.55143	-2.71147	1.43896	-1.17304	0.315002	1.58565	-3.31211	0.632098	0.268335	1.18807	1.27103	4.50467	1.65464	-1.86348	-2.21721	1.16715	-1.7561	-1.64047	-0.607729	2.75496	-4.39733	3.82737	0.00862579	-0.595139	-1.57099	-1.55001	-0.47957	-0.109248	-0.0832331	-2.38872	-0.793386	-1.97161	-0.320148	-1.40924	1.78506	-0.908828	1.40731	1.24194	-0.762613	2.05585	-0.888543	1.15369	6.18832	1.41993	-0.256194
TCGA-Q1-A5R1-01	0.321894	0.112016	-1.37185	-3.42087	-0.190594	-3.18071	0.37036	-0.480224	0.13625	1.24619	-1.24078	-1.20346	-0.435629	0.604846	-0.0531213	4.81145	2.14101	-0.247827	-1.98542	0.58362	-4.1702	-2.21069	0.212793	2.77382	-3.8285	2.85582	-0.949792	0.183637	1.50034	-0.683042	2.53366	0.431567	1.0354	-1.73243	-0.289096	-1.09293	0.651646	0.495627	2.64835	-0.0251249	1.15671	-0.45226	-0.575806	1.13292	-1.77282	1.26875	5.24817	1.46088	-0.607319
TCGA-Q1-A6DV-01	1.26859	0.366688	-1.75919	-2.69175	0.982883	-2.95833	0.975363	-1.04233	0.494623	0.384314	-0.93811	-1.55406	-0.406944	1.09657	1.82097	1.43991	4.27055	0.463907	-0.43605	0.891422	-0.672807	-2.3517	0.0414928	2.32635	-1.6273	3.54095	-0.715432	1.12725	0.753312	-0.328388	1.34758	1.39412	2.4411	-2.42698	-1.31486	-1.08096	1.23393	0.228429	3.01458	0.149734	1.42349	0.322668	-1.17939	1.56356	-2.13539	0.0219784	5.05067	1.87105	0.595602
TCGA-Q1-A73P-01	-0.922054	-0.344278	-1.15371	-3.25583	-2.29233	-3.86741	0.270846	-1.83302	0.331961	0.937454	-2.88308	-3.43073	-1.87148	0.698594	0.220803	4.34046	4.30032	-1.96052	-1.65326	-0.0283135	-3.13444	-3.91189	0.476159	2.32416	-3.51145	2.51203	-0.674561	0.105012	0.71364	-0.894715	0.225087	0.841728	1.3024	-2.42918	-0.598828	-1.73524	1.20198	2.60269	2.71901	-1.03	1.05873	-0.126989	-2.18159	1.02112	-2.79655	2.95267	5.03713	1.9598	-0.910939
TCGA-Q1-A73R-01	-0.533125	0.0872106	-5.91486	-3.08737	-1.12388	-3.52903	1.04851	-1.1829	0.124888	1.07444	-3.65804	-1.33628	-1.82332	1.56614	0.992917	1.29583	1.2197	-1.31491	-2.5697	-0.409197	-1.05909	-2.89544	0.479555	0.808112	-1.39546	2.80939	-1.63009	0.662032	0.0671264	-2.6986	-0.670588	-0.404855	2.44193	-1.52821	0.14892	-0.58754	0.572073	-0.342279	1.93583	-0.882306	0.945896	-0.200735	-0.596293	1.65677	0.442289	-0.383671	4.63347	0.831614	0.0684504
TCGA-UC-A7PI-01	-0.323947	-0.913513	0.129241	-4.05673	-2.12238	-2.16497	0.693311	-0.701043	0.446044	1.39419	-3.00111	-1.48317	-0.485044	0.973896	0.458579	3.23843	3.21297	-1.84947	-2.34313	0.303907	-4.18688	-2.3529	-0.241417	3.28501	-1.62708	2.64886	-0.860271	1.06262	0.27125	-0.21953	-0.765956	0.0693924	2.30399	-1.56736	-0.931379	-0.894595	1.08814	2.45232	2.74752	0.197663	0.921395	0.00499223	-2.7486	1.01035	-2.927	1.39868	4.84633	2.41122	-0.174062
TCGA-VS-A8QH-01	-1.89121	0.0366405	-5.90605	-4.4936	-3.62964	-4.29783	2.56659	-1.00918	-0.717077	2.29458	-1.8235	-2.18308	-1.53072	0.863784	0.154347	-3.26883	2.29067	-3.1868	-3.04304	0.856769	-4.14982	-2.10624	0.514358	0.276353	-1.01804	3.91909	-1.34445	-0.148996	-0.199172	-1.72679	1.17157	0.836614	1.68655	-1.83758	-2.56417	-4.8799	1.1126	-0.317529	2.49702	-1.71524	1.66895	0.568123	-4.25586	1.75345	-1.06891	-0.133105	5.2247	1.40241	-0.528637
TCGA-VS-A952-01	-0.536604	3.3213	0.161383	-3.7359	-1.85814	-2.95517	3.31081	-0.773226	0.809623	2.66263	-0.687401	0.32539	0.0382882	2.94193	0.137862	4.82718	4.92644	0.146581	0.609167	1.10103	-0.674708	-3.22616	0.648432	2.57115	-5.259	3.75716	-1.09079	1.99299	-2.00056	-1.12404	0.537817	0.246174	1.9154	-1.16293	-0.252097	0.713604	1.97857	3.23927	4.42726	0.908423	1.09544	0.380268	0.615177	1.19545	-2.30912	0.231582	5.30296	2.25277	1.61965
TCGA-VS-A9UO-01	0.776239	-0.571421	0.499506	-5.32405	-2.00067	-2.80636	1.54011	-1.80487	1.13678	2.74668	-4.43418	0.182864	-0.438345	0.840685	0.238561	4.82057	3.37533	-1.69533	-1.91413	-0.423488	-7.3022	-1.17277	0.860493	3.07039	-6.22353	3.52316	0.655175	0.0276744	-0.593528	-1.12186	1.94739	0.258926	0.0260226	-1.20463	-1.94716	-1.95547	0.734659	-0.467602	2.03598	-0.719719	1.5561	-0.64566	-0.167454	1.34838	-3.92684	6.75371	4.33877	2.13788	-1.34488
TCGA-VS-A9UP-01	2.4254	2.08959	-0.719839	-3.57042	-2.85847	-2.43355	-0.370575	0.278915	0.652895	2.68243	-3.18618	-1.77447	-0.329558	3.57323	0.416511	3.58981	2.2545	-2.00059	1.24004	-0.516444	-4.70057	-2.51867	0.623405	2.74909	-5.20686	2.2268	-0.627716	1.57868	1.18498	-0.977638	1.83583	0.16868	3.30275	-0.629665	-0.377954	0.535132	2.40844	-0.26697	3.57467	1.6626	0.948274	-1.56759	-0.187005	0.638359	-1.91018	0.538537	4.42078	1.53916	2.18672
TCGA-VS-A9UQ-01	0.986617	-0.040037	0.134771	-3.6556	-1.52218	-1.47277	0.0969537	-2.25927	0.547382	1.66096	-3.33177	-2.83051	-1.06962	0.585343	0.341862	3.49737	3.37815	-2.41919	-2.18796	-0.31261	-2.94925	-1.83054	-0.300178	1.97685	-2.96369	2.43149	-1.76948	0.470179	-0.442208	-0.963282	1.6416	-0.873548	2.35503	-0.900039	-2.62663	-0.897971	0.325772	-0.599306	1.81431	-2.65217	0.284558	-0.313769	-0.960775	0.785982	-2.77183	1.80443	4.66229	2.7979	-0.272032
TCGA-VS-A9UR-01	1.09715	0.0961238	0.0685106	-3.93448	-2.55595	-3.22414	1.10187	-1.33884	0.77686	1.4012	-4.24623	-0.993905	-0.738207	1.22348	0.662447	0.727699	3.45103	-2.0351	-0.853864	-1.29193	-3.81309	-2.26861	0.980373	2.61854	0.408541	1.44947	-1.53378	0.466162	0.0349894	-1.01449	-0.276685	-0.184846	2.37168	-1.41595	-2.14255	0.171076	0.693259	-0.747875	1.75192	0.0283133	0.0581485	-0.805639	-1.42728	0.294111	-2.4012	0.0516237	4.7858	3.295	-0.809371
TCGA-VS-A9UT-01	-0.528898	-0.509428	-3.52693	-3.6588	0.74948	-3.72607	-0.885486	-0.728875	-0.546515	0.458695	-2.00093	-1.19627	-1.54392	0.237386	2.04414	2.58834	-0.392371	-2.2	-3.05623	-1.20889	-0.542427	-3.45504	1.17359	2.40364	0.774881	-0.602658	-0.620675	-0.950037	-0.392939	-2.22214	0.717343	0.101721	1.15448	-1.85077	-0.544942	-0.723171	0.243797	0.361154	1.40672	-1.90246	-0.0812105	-0.959645	-1.98366	0.84582	-4.22506	-0.397838	3.62654	2.43508	0.2429
TCGA-VS-A9UZ-01	0.283074	0.474032	-3.49013	-3.7501	-0.841754	-4.70634	0.173766	-0.908991	-0.186624	1.64507	-3.27526	-1.63223	-1.6173	0.812765	-0.300384	4.8256	3.42845	-2.32783	-2.88451	0.465334	-2.33593	-1.86185	0.543255	1.66894	-3.20664	1.93164	-1.72648	0.30261	1.32722	-0.999783	0.277635	0.468464	0.953609	-2.16119	-0.695143	-0.0595905	1.80784	3.04068	2.60577	-0.598282	-0.172518	-0.202956	-3.60548	0.723646	-3.29845	0.836899	3.69802	2.80588	-0.927654
TCGA-VS-A9V0-01	-1.49919	-2.09844	-1.82814	-5.00065	-1.2298	-1.73449	0.843052	-2.20136	-0.78839	1.38355	-1.07209	-1.10517	-1.28288	0.890658	0.498541	3.29558	1.35478	-0.956886	-0.491194	-1.06532	0.981206	-5.17129	0.433574	1.59527	2.61261	2.58799	-1.43646	3.21322	-1.20872	-0.366841	1.14257	0.81937	-0.598105	-1.63413	-0.623759	-0.801988	0.643027	-0.395735	3.45476	0.151174	-0.423062	-2.26085	-2.00802	1.20813	-2.25949	0.470877	4.75574	1.23341	-0.0865675
TCGA-VS-A9V1-01	-1.1656	0.192368	-1.97099	-3.68781	-2.08689	-3.49205	-0.914503	-0.5202	0.0349013	2.00479	-1.2626	-4.22529	-2.40301	-0.00593319	0.174145	2.28141	2.68904	-1.42166	-3.08525	-0.707396	-0.9748	-2.04349	1.48337	2.06011	-0.660501	2.34233	-0.884157	0.335456	0.715547	0.0912394	-2.77111	0.525216	0.942021	-0.912954	-0.48085	-1.43026	0.992387	-0.890256	2.18748	-1.2396	-0.472798	-2.21105	-4.12815	0.707456	-1.86176	3.41684	4.14642	1.89569	-0.120536
TCGA-VS-A9V4-01	-4.00408	-1.33757	-3.43096	-3.62583	-2.27002	-3.03775	1.51904	-1.59208	-0.885197	3.09672	-0.152955	-2.99339	-0.948712	0.483863	0.662064	-0.494174	2.43855	-1.88163	-0.309024	0.578957	-5.69709	-4.25215	0.610942	3.7001	0.335776	3.57424	-0.739715	0.37684	-0.511979	-0.725065	1.93329	0.864036	1.48111	-2.01985	-3.24894	-1.78332	1.09876	2.12009	2.1889	0.123551	1.03922	-0.756757	-2.48121	1.1206	-0.498612	0.245623	5.09321	1.80986	-0.412193
TCGA-VS-A9V5-01	0.570179	1.21114	-0.187455	-3.00382	-0.33731	-2.25704	0.513151	-1.58897	1.09016	2.01411	-2.63332	-0.274074	1.48408	0.692436	0.134468	3.34302	2.67612	-1.29886	-1.54212	-0.0259845	-1.64336	-2.81936	-0.0127363	3.47383	-3.66778	3.61798	-0.414683	-0.5514	0.541751	-0.454265	2.3004	0.500358	2.42955	-1.3266	-2.24584	-0.209056	0.589967	-2.72564	2.03621	0.205129	0.902389	0.155199	-1.6416	0.25495	-0.559638	-0.347124	4.39614	1.8396	-0.912663
TCGA-ZJ-AAXB-01	-1.07998	-0.705301	-1.07178	-3.17627	-1.06839	-3.32155	0.656537	-1.69	-0.232903	2.49168	-3.98107	-1.46983	-1.89147	1.32108	1.10109	-1.55558	4.09961	-2.05851	-1.77724	-2.9743	-3.17353	-3.15744	-5.09432	1.11514	0.269712	3.98319	0.319898	-2.24596	0.274615	-1.71808	0.340503	0.428238	0.193355	-4.90568	-1.23996	-2.90361	1.01089	0.8163	2.01656	-1.11092	2.10758	-0.192555	-1.27957	2.79977	-2.1201	-0.993318	5.65556	1.20675	-0.188193
antisense	ENSG00000273055.1	ENSG00000268895.4	ENSG00000261663.1	ENSG00000280007.1	ENSG00000259248.4	ENSG00000267080.4	ENSG00000239523.4	ENSG00000117242.7	ENSG00000225439.2	ENSG00000270344.2	ENSG00000280195.1	ENSG00000237883.1	ENSG00000238058.1	ENSG00000259172.1	ENSG00000255568.3	ENSG00000259523.1	ENSG00000253930.1	ENSG00000259408.2	ENSG00000262903.1	ENSG00000266962.2	ENSG00000250365.5	ENSG00000244184.1	ENSG00000230082.1	ENSG00000230424.1	ENSG00000273247.4	ENSG00000259943.1	ENSG00000259456.3	ENSG00000237054.8	ENSG00000235423.7	ENSG00000267801.1	ENSG00000233203.5	ENSG00000259642.2	ENSG00000232442.1	ENSG00000250802.5	ENSG00000222020.2	ENSG00000271335.4	ENSG00000236540.6	ENSG00000269821.1	ENSG00000177640.14	ENSG00000255237.1	ENSG00000228109.1	ENSG00000269293.2	ENSG00000267892.1	ENSG00000272572.1	ENSG00000221990.4	ENSG00000234684.5	ENSG00000266208.1	ENSG00000272323.1	ENSG00000277283.1
TCGA-4J-AA1J-01	1.13862	0.374227	2.3424	0.0479751	0.405008	4.28501	0.590005	0.890947	1.28533	0.31805	0.676679	12.3919	2.0737	0.240418	0.51919	0.628383	4.99235	0.945834	1.90835	2.59595	0.19867	0.848084	2.10072	1.09658	0.444549	4.66131	1.67929	0.167103	1.06381	0.273168	0.523262	0.542406	4.91416	0.0719348	1.30602	0.519742	0.990782	0.0698695	0.117489	0.200952	3.3192	1.35714	1.37936	0.312455	2.05938	1.21112	5.02334	0.52577	1.2638
TCGA-BI-A0VR-01	0.136144	0.218335	0.665889	0.0146016	0.211316	3.86248	0.492016	0.858622	0.448492	0.142857	0.577797	2.13134	1.368	0.136888	0.165544	0.254116	3.49532	1.72121	0.924889	1.63705	0.087101	0.180275	2.77165	0.643348	1.25342	2.74246	2.08058	0.0399608	0.977208	0.178666	0.593218	0.560817	2.85049	0.0344047	0.231348	0.532313	1.0447	0.0244439	0.0961275	0.192221	3.85979	2.20953	1.06811	0.1646	1.09155	0.293558	5.84467	0.335285	0.927833
TCGA-BI-A0VS-01	0.944968	0.559745	0.822979	0.0193046	0.124625	2.45732	2.06795	0.808002	1.69224	0.110894	0.788358	4.4046	2.8672	0.165436	0.337952	0.0319242	1.32712	0.516557	1.86825	1.09146	0.213376	0.637909	1.49	0.93649	0.462987	4.98991	1.93633	0.0833912	0.52099	0.0802428	1.02938	0.356492	3.29632	0.104886	0.302264	0.713529	0.858193	0.0499012	0.220482	0.418572	3.39586	1.8471	2.41138	0.099039	3.53752	0.610701	3.18547	0.754767	1.2222
TCGA-BI-A20A-01	0.627795	0.175605	2.30294	0.0216424	0.14436	9.73619	0.467109	0.853686	0.240686	0.270413	1.88867	3.08076	1.15651	0.151495	0.620237	0.326751	1.79657	0.712293	1.55258	2.90504	0.10954	0.415648	1.22483	0.838401	0.715286	4.47709	1.44617	0.0870162	0.539995	0.447983	0.470162	0.553607	4.04128	0.0713922	0.933456	0.961014	1.37021	0.0574287	0.109188	0.517056	5.82758	1.84425	1.45898	0.209728	1.40582	0.427051	9.20499	0.898401	1.60053
TCGA-C5-A0TN-01	0.279636	0.195548	1.44165	0.0214224	0.217019	2.2113	0.468141	0.452371	3.72845	0.100525	0.574613	4.29355	7.09487	0.126525	0.425031	0.602249	2.84657	0.793185	1.39978	2.9091	0.0853858	0.462851	5.37269	0.344719	0.310367	5.42974	1.31975	0.109438	0.833554	0.461014	1.19942	0.636308	4.14567	0.0423999	0.641498	0.216609	0.770942	0.0412303	0.0609753	0.296113	3.54839	3.32294	1.21677	0.1468	7.72446	0.269179	5.1643	0.656095	1.99269
TCGA-C5-A1BE-01	0.226767	0.0811913	1.49284	0.0305751	0.22683	5.2198	0.578488	1.11329	0.262748	0.163921	0.994081	4.71886	1.09373	0.0875549	0.510116	0.273496	1.95796	0.205831	0.518918	1.69732	0.0712209	0.210192	1.29265	0.531136	0.488231	4.55264	1.19255	0.0576858	0.661835	0.843682	0.74107	0.406092	4.05194	0.0573061	1.06355	0.60225	0.656445	0.0261297	0.139865	0.320172	12.3687	1.29083	0.923933	0.199131	1.18463	0.387678	3.41126	0.534316	2.77503
TCGA-C5-A1BF-01	0.337106	1.15847	0.668436	0.0391065	0.232551	3.13222	0.506764	1.44634	0.878016	0.190901	0.683003	1.68762	1.35493	0.325392	0.248871	0.186691	2.40979	0.421507	1.6358	1.63962	0.134444	0.542032	0.441186	1.03891	0.350029	2.50985	1.12018	0.0848117	0.471364	0.156419	0.66886	0.463277	2.5552	0.0851896	0.171852	0.575542	1.54012	0.00476105	0.228021	0.113323	1.84979	3.06832	0.123824	0.156285	0.624417	0.530325	2.37168	0.432729	0.632447
TCGA-C5-A1BI-01	0.125813	0.273492	1.21171	0.0148705	0.235577	4.32436	0.664828	0.753438	0.177626	0.0866142	1.22819	3.05182	3.03407	0.212522	0.513585	0.449022	4.69083	0.734126	1.24672	1.20929	0.244611	0.38079	0.493972	0.819787	0.63129	2.61697	2.06004	0.087925	0.582136	0.215821	0.484574	0.385704	3.15542	0.0290689	0.458128	0.334135	1.13968	0.037131	0.0582268	0.642869	4.2507	1.05426	0.199071	0.116656	1.17534	0.520419	4.50619	0.380425	0.981707
TCGA-C5-A1BJ-01	0.626107	0.30302	1.73231	0.0450647	0.200892	3.01127	0.529308	0.804963	2.02451	0.102989	1.056	3.93473	1.78496	0.179197	0.283281	0.482929	4.04303	0.509773	1.05165	2.22297	0.25914	0.115683	5.21716	0.771828	0.344382	3.29527	1.94377	0.173802	1.04167	0.45287	0.309294	0.642178	3.54472	0.0662328	0.757129	0.476933	1.14006	0.0410012	0.156935	0.191876	4.49027	1.06445	11.9457	0.194572	3.40923	0.612224	6.32334	0.866427	1.26032
TCGA-C5-A1BK-01	0.421859	0.310968	1.43679	0.0334584	0.26106	4.18	0.886258	1.34046	0.295983	0.190952	0.711886	2.52814	2.09453	0.149706	0.25648	0.288599	4.13911	0.482661	1.7568	2.08537	0.147215	0.558605	5.60767	0.764769	0.458227	2.37524	2.04116	0.0776932	0.282633	0.503143	0.567668	0.323191	6.27351	0.0275925	0.733729	0.637076	0.937275	0.00795212	0.0865762	0.467154	6.11393	2.05073	0.363197	0.123167	1.19376	0.347798	5.00689	0.218025	1.84425
TCGA-C5-A1BL-01	0.667477	0.488827	1.03475	0.0260319	0.340109	4.12394	0.793325	0.648725	0.237806	0.242896	0.968169	2.45525	4.69487	0.468569	0.811621	0.444329	4.25687	0.216376	0.650884	1.63964	0.169402	0.120524	1.51329	0.486216	1.09903	2.92865	1.90238	0.0890533	0.734308	0.734607	0.421387	0.538832	3.24326	0.0981396	0.928014	1.08779	0.90337	0.0316499	0.187129	0.371252	4.96119	1.92868	1.5962	0.139004	3.97948	0.827094	6.90036	0.508895	1.22251
TCGA-C5-A1BM-01	0.312714	0.16328	0.661409	0.023637	0.226511	3.12502	0.265914	0.888593	0.0994638	0.0761595	0.510708	0.451899	2.09482	0.0905543	0.253497	0.287355	5.54327	0.229778	1.17775	1.18862	0.0873016	0.220843	0.976171	0.97659	0.552053	2.70573	1.84131	0.0734301	1.05366	0.246232	0.698327	0.24992	2.22856	0.0337176	0.233813	0.193785	0.321864	0.0757619	0.0155858	0.0784925	1.95618	0.632513	0.816422	0.0875549	1.0264	0.452734	2.9121	0.133212	0.759136
TCGA-C5-A1BN-01	0.272833	0.964634	0.800667	0.0234093	0.192918	2.93905	0.713402	0.537314	5.53215	0.0657397	0.316593	12.9122	1.91904	0.210682	0.912317	0.752123	3.77447	0.406843	0.058531	2.62452	0.152335	0.578035	4.13804	0.538131	0.237965	3.0209	0.993323	0.101437	0.718594	0.332985	0.356644	0.718746	3.4913	0.0413684	1.33523	0.652132	1.05306	0.0643635	0.0475934	0.231127	1.75161	2.08913	0.388527	0.197916	1.40477	0.378187	3.01302	0.31598	0.627033
TCGA-C5-A1BQ-01	0.167231	0.201142	1.30981	0.0224197	0.144204	7.16977	0.626582	1.18799	0.299196	0.138107	0.411016	3.65515	1.3443	0.0756655	0.216054	0.24311	2.00999	0.664088	0.433504	2.45708	0.1386	0.249119	1.70227	0.618457	0.287448	2.49259	0.859719	0.0490854	1.22018	0.255126	0.375723	0.383625	3.62099	0.0739563	1.10828	0.675452	0.656991	0.0352039	0.144558	0.118056	2.6841	1.47984	0.611901	0.0877911	1.23343	0.605274	2.16501	0.626114	0.861011
TCGA-C5-A1M5-01	0.559046	0.255203	1.93325	0.0294653	0.188971	7.17556	1.39761	1.1922	0.220997	0.274621	1.00911	3.55463	1.84251	0.318375	1.06045	0.491236	4.27841	0.623417	1.13536	1.47435	0.148267	0.473767	1.59337	1.43345	0.966417	6.131	3.46765	0.122521	0.676522	0.369762	0.67597	0.503048	5.3043	0.133364	0.683987	0.781951	0.696649	0.0420807	0.169965	0.484113	10.8472	1.8609	1.11455	0.870841	1.36148	0.761145	6.56758	1.11631	3.57746
TCGA-C5-A1M6-01	0.224474	1.82268	0.966508	0.0353758	0.353948	9.45085	2.55642	1.62396	2.65555	0.321535	0.651195	5.76941	2.77113	0.394656	0.662879	0.0414383	2.54855	0.478188	1.71988	2.79882	0.223812	1.31634	0.979267	2.49047	0.589628	7.24437	1.64317	0.1506	0.627749	0.454503	0.445385	0.650201	3.50303	0.48947	0.425041	0.59616	0.795681	0.00787114	0.227754	0.150921	6.79222	3.10411	1.06554	0.122433	3.7602	1.3187	5.58008	1.19101	1.06242
TCGA-C5-A1M7-01	0.145727	0.209635	1.99794	0.0357244	0.233371	3.78175	1.12854	1.50818	0.134796	0.156958	0.731427	3.30925	1.21328	0.080379	0.240482	0.53803	3.86051	1.43071	2.32239	1.89573	0.138032	0.909692	2.18269	1.59113	0.75248	6.61122	1.82468	0.0896211	0.674279	0.139334	1.36066	0.585403	6.18892	0.050505	0.424514	1.41909	0.809264	0.045989	0.249021	0.195954	4.55797	3.58519	0.642333	0.174862	1.95601	0.484158	4.17556	0.581977	1.00661
TCGA-C5-A1M8-01	0.397707	0.103048	2.05866	0.0237327	0.241867	8.13134	2.22936	1.4752	0.178332	0.245672	1.28193	6.15556	2.90254	0.363682	2.37979	0.865552	0.985806	0.882116	0.89811	1.62894	0.328705	1.57987	0.724436	2.32233	0.725342	5.90027	2.27214	0.15155	0.759915	0.387323	1.3168	1.66048	7.77435	0.0909827	2.68905	0.870929	1.2061	0.0512355	0.178658	0.748695	17.8376	2.44351	1.41589	0.375611	2.99725	0.738266	3.40494	1.19539	3.71107
TCGA-C5-A1MF-01	1.05421	0.0337006	0.549466	0.0313815	0.0207783	2.15801	0.960468	1.08468	0.800635	0.217727	0.262135	11.2298	0.605311	0.0508789	0.0915622	0.0518957	0.472846	0.703015	0.258469	0.919691	0.10511	0.877445	6.89848	0.816872	0.331346	1.51481	1.584	0.00589392	0.289453	0.112655	0.319905	0.267466	4.20688	0.173546	0.429939	0.693279	0.473328	0.0207418	0.0469128	0.113405	15.8502	6.34469	0.977003	0.528991	0.40752	0.180922	0.728195	0.505212	0.575364
TCGA-C5-A1MH-01	0.260029	0.677092	1.64993	0.0202825	0.17938	4.70858	0.648263	1.32015	0.515572	0.198437	1.11246	2.98903	1.33017	0.0969746	0.459903	0.315648	5.79842	0.429131	0.709981	1.59688	0.148486	0.313016	2.43031	1.4279	0.521951	6.19354	2.42255	0.0832619	0.849779	0.437414	0.772516	0.647231	4.70345	0.107528	0.650747	0.533635	0.77554	0.0377148	0.120763	0.489512	5.5258	1.83057	0.944437	0.126354	1.59915	0.484226	5.28462	0.179369	1.67217
TCGA-C5-A1MI-01	0.833573	1.82535	2.64458	0.0425723	0.403895	6.20218	0.5063	0.804064	2.0967	0.320869	0.479797	5.04778	4.62671	0.0670506	3.24589	0.555674	1.18786	0.476101	1.37668	3.28209	0.235482	1.52426	0.16162	0.709519	0.578579	4.4997	3.65306	0.178648	1.60352	0.457105	0.129719	0.890012	4.5684	0.361117	0.849891	0.351398	1.03415	0.0912055	0.241113	0.186813	5.61953	1.15843	0.698726	0.257635	1.92443	1.75458	4.42505	0.951133	1.93707
TCGA-C5-A1MK-01	0.327403	0.329689	1.10363	0.0217375	0.221152	3.47283	1.11362	0.809818	1.18083	0.101792	0.721136	6.5449	2.24804	0.0329194	0.29858	0.575851	0.776318	0.442226	0.897486	2.13061	0.104732	0.108383	1.44416	1.14354	0.246544	3.47463	1.83951	0.0533883	1.00022	0.13964	0.401229	0.658185	2.49078	0.0496426	0.806713	0.410606	0.834935	0.0455758	0.16148	0.359535	2.42534	1.1037	0.766271	0.135418	0.974121	0.382394	4.83717	0.2724	0.879485
TCGA-C5-A1ML-01	0.281367	0.584653	1.4984	0.0369515	0.0901178	4.58529	0.871582	1.40227	0.328751	0.259313	0.738503	1.94587	2.82724	0.0581978	0.464318	0.155823	2.4846	0.260602	1.46593	2.72617	0.0981879	0.266124	0.900139	2.08112	0.729595	6.14602	1.73443	0.117981	1.57371	0.221549	1.01802	0.642478	3.10498	0.22347	0.532768	0.249086	1.2079	0.126889	0.225377	0.264841	19.3213	2.50872	0.620102	0.184157	3.32342	0.563358	3.45518	1.26814	2.07551
TCGA-C5-A1MN-01	0.460718	1.33381	0.753674	0.0247063	0.0397281	2.09231	1.32221	1.20708	0.480831	0.111907	0.315571	2.87117	3.70352	0.118126	0.665252	0.731779	2.42971	0.50406	0.350052	1.86737	0.200969	0.724448	1.93451	1.17139	0.246625	2.25398	1.70844	0.0563457	0.307463	0.334429	0.164677	0.281267	2.42654	0.0203748	0.998192	0.446097	0.944694	0.0347501	0.326497	0.216829	2.24368	0.615702	0.672033	0.274844	6.65547	1.18855	6.08488	0.321988	0.96258
TCGA-C5-A1MP-01	0.033956	0.372324	3.36651	0.0114457	0.310373	8.53213	1.27768	0.654396	0.462868	0.145161	0.941276	2.99323	2.11542	0.0983281	1.05287	0.160887	5.63046	0.726496	0.801307	3.0462	0.130345	0.494592	1.4517	0.920897	0.96854	3.27771	2.83882	0.0664449	0.821828	0.668425	0.30516	0.547774	8.63737	0.0446211	2.63117	0.631264	0.926787	0.0965427	0.052887	0.60727	6.80089	1.22645	0.899941	0.207428	1.4931	1.62646	3.83099	0.637353	1.62158
TCGA-C5-A1MQ-01	0.418554	0.706718	1.50898	0.0139918	0.05906	4.08925	2.59655	0.711892	0.596482	0.189282	0.294356	1.07223	1.37642	0.202005	0.532076	0.262235	0.970673	0.246696	1.30608	2.11802	0.212453	1.15884	2.74998	0.938125	0.23919	3.39515	1.15444	0.0893481	0.311489	0.284629	0.49739	0.484302	6.32391	0.0692328	0.969881	0.437903	0.335689	0.0280188	0.175422	0.322339	2.60991	5.69524	0.361238	0.610154	4.1328	0.486413	3.81594	1.59556	1.60133
TCGA-C5-A2LT-01	0.522415	0.528846	0.789242	0.0182954	0.13729	1.92771	0.666346	0.990345	2.56026	0.179825	0.617433	1.65367	2.19973	0.198103	0.151246	0.385755	2.80695	0.854821	4.9455	1.78806	0.078131	0.263527	1.62065	0.76667	0.297122	3.18831	1.32502	0.0876222	0.628652	0.36238	0.42681	0.357131	3.591	0.0226318	0.355095	0.198205	2.01638	0.0378241	0.153435	0.257573	8.14943	1.89768	3.52292	0.0854812	2.82352	0.252876	4.21001	1.38095	1.31424
TCGA-C5-A2LV-01	0.265139	1.07291	0.893751	0.00609355	0.0495368	2.37453	1.2682	0.73973	0.579781	0.0789988	0.256388	1.88382	1.59851	0.197276	0.107466	0.171308	1.10561	0.372451	0.268603	1.60601	0.115656	0.555884	1.79926	0.926069	0.199657	2.58085	0.521388	0.0951175	0.314563	0.0521927	0.324925	0.196202	1.79297	0.00446687	0.18022	0.244499	0.663969	0.0150647	0.0688264	0.0623915	1.46701	1.82592	0.375824	0.160279	0.921729	0.656777	1.15407	0.34413	0.92326
TCGA-C5-A2LX-01	0.689649	0.325185	2.77404	0.0279259	0.131681	4.19266	1.08386	0.945881	0.268597	0.373314	0.523982	1.35253	0.643477	0.118872	0.314468	0.053046	1.86081	0.974098	0.792594	1.01162	0.214879	0.423986	2.5573	2.18612	0.478037	3.40645	2.55735	0.106032	0.718852	0.252121	0.100614	0.670728	7.95642	0.117017	0.778487	1.52631	0.991405	0.0267014	0.139638	0.486857	10.8933	4.36269	0.740468	0.45138	1.32371	0.690414	1.89668	1.9181	1.5291
TCGA-C5-A2LY-01	0.15108	0.321173	1.64764	0.0231479	0.0716524	4.96114	1.87886	0.42505	0.321786	0.0939433	0.389581	3.73879	1.29037	0.118487	0.482228	0.211496	0.444701	1.34683	1.86365	1.28594	0.210887	1.05028	4.26757	0.325924	0.581697	3.29353	1.45151	0.0960803	0.322636	0.13383	0.339436	0.318625	4.83323	0.0992659	2.84969	1.38762	1.21832	0.0221468	0.105889	0.568824	15.6684	6.20986	1.89746	0.317249	1.49047	0.25014	2.7394	0.633521	1.11605
TCGA-C5-A2LZ-01	0.285299	0.359839	2.18056	0.0468916	0.2818	6.18096	0.744345	1.68195	0.521484	0.161275	1.37941	3.74802	1.66793	0.281644	0.362679	0.379839	2.39208	1.98423	2.20711	1.78712	0.171967	0.412123	2.48169	1.47075	0.857994	4.37601	2.99023	0.152256	1.60625	0.347179	0.614504	0.683261	4.02725	0.0812738	0.13222	0.964345	1.473	0.0762171	0.15189	0.512672	4.24112	0.749431	1.42609	0.277266	1.49138	1.46603	4.54412	1.01508	1.11474
TCGA-C5-A3HD-01	0.415783	0.0581509	1.36033	0.0302598	0.461611	6.64847	0.298314	0.976027	0.256818	0.317115	0.728733	4.48755	2.40228	0.225751	0.0789958	0.123127	3.36559	0.60653	1.39372	1.98718	0.262984	0.894661	3.28005	0.41645	0.545196	5.10117	1.85718	0.0508501	1.11915	0.29158	1.06154	1.01149	4.21753	0.0604165	0.741865	1.44932	1.26809	0.0487244	0.160278	0.513663	4.79118	3.03356	1.49052	0.119058	1.43566	0.54432	6.94958	0.850994	0.860941
TCGA-C5-A3HE-01	1.38704	0.242663	2.14025	0.0262749	0.3088	3.74183	0.176919	0.979128	0.275016	0.290107	0.70721	2.0955	1.21635	0.304283	0.0766626	0.0977647	1.68258	2.87768	1.71324	1.90123	0.184812	0.601087	4.31269	0.373061	0.380472	1.95361	0.83315	0.113501	0.646271	0.143966	0.453282	0.306055	4.89975	0.206487	0.154276	1.54046	0.556218	0.0538193	0.0911271	0.356066	3.57028	1.88734	0.977633	0.182941	0.559199	0.295195	2.37105	0.543859	0.722606
TCGA-C5-A3HL-01	0.205135	0.0816068	1.01237	0.0153658	0.0825483	4.22732	0.610521	1.57749	1.51465	0.102753	0.514277	3.57372	0.870303	0.126504	0.291007	0.304349	2.2587	0.221662	1.02685	1.98932	0.0636314	0.392354	0.881642	0.674342	0.442373	3.03213	1.33695	0.0669011	1.40346	0.551872	0.540025	0.360944	1.22714	0.096767	0.302106	0.191688	0.697507	0.0223783	0.13064	0.171632	5.50308	1.07352	0.793419	0.0957241	0.976539	0.291369	4.04778	0.46423	1.30618
TCGA-C5-A7CG-01	0.657456	0.735607	2.15695	0.0750919	0.195848	7.07628	1.01012	1.15606	0.733259	0.545861	0.780246	4.31855	2.16205	0.19471	0.254366	0.0772339	6.01089	0.930012	1.8806	1.9461	0.208573	0.474858	1.76435	1.10519	0.530698	5.22395	2.35738	0.111107	1.08493	0.276489	0.36623	0.43344	7.90481	0.154062	0.243755	0.92595	1.49125	0.0152817	0.329541	0.393808	5.0507	1.95153	0.602889	0.273834	0.505411	0.685802	7.13572	0.704145	2.60454
TCGA-C5-A7CH-01	0.442408	1.22607	1.3226	0.0281565	0.275848	3.27691	0.737926	1.00532	0.197156	0.0264515	0.647193	6.46695	2.12012	0.0985465	0.413806	0.351806	3.57276	0.242703	2.1659	2.17018	0.237517	0.766067	1.1778	1.25856	0.20323	2.49825	0.986617	0.206437	0.472389	0.716803	0.695086	0.32738	3.71754	0.0172001	2.01246	0.497095	1.3229	0.0211149	0.0636053	0.12813	5.7329	1.06201	0.511548	0.0909514	1.53479	0.377381	4.81461	0.149499	1.06653
TCGA-C5-A7CJ-01	0.458157	0.44671	1.73906	0.0511437	0.474087	3.58351	0.333934	1.00817	0.356876	0.150075	0.938812	1.91529	1.24957	0.126353	0.338238	0.338307	6.55024	0.742605	1.94238	1.73319	0.251243	0.130001	0.532989	1.12958	0.660867	3.91549	1.69894	0.102459	1.88694	0.457384	0.534731	0.586045	3.08972	0.0595443	0.233563	0.521476	1.27214	0.0653764	0.0448541	0.0924102	6.21325	1.11581	0.647261	0.0874613	1.04543	0.448585	5.15732	0.300594	1.36747
TCGA-C5-A7CK-01	0.781854	0.778847	2.80057	0.0579643	0.243581	4.75459	0.595141	0.819558	0.893878	0.178392	0.861732	8.47385	2.83839	0.109551	0.092003	0.260728	4.15732	0.752185	2.97589	1.09041	0.272841	0.434156	0.128365	0.746186	0.580666	3.16082	1.47939	0.162863	2.06465	0.690105	0.473926	0.559905	2.55832	0.0764832	0.6943	0.535859	1.05691	0.0698163	0.0707081	0.403576	6.47689	1.62515	2.96308	0.105922	1.03319	0.672014	2.56698	0.352531	1.06142
TCGA-C5-A7CL-01	0.781461	0.328756	2.70239	0.0258622	0.318062	5.04297	0.538251	0.809075	0.394139	0.182221	0.866499	11.2928	3.70629	0.0754306	0.342079	0.242355	3.37365	2.3914	2.90589	1.60482	0.109082	0.372519	0.604551	1.00187	0.365972	5.46414	2.6133	0.171266	0.667535	0.461493	0.459683	0.532015	3.36584	0.0252777	1.49791	1.57731	1.70632	0.0189681	0.0584226	0.23538	6.2263	1.77933	0.445136	0.0716061	1.83265	0.486247	1.98724	0.686587	1.45544
TCGA-C5-A7CO-01	0.864492	0.276358	2.52228	0.0510895	0.26091	8.27561	0.551334	1.18568	0.0736515	0.326371	0.696632	6.11248	1.55118	0.141559	0.187711	0.0930923	1.96905	0.340294	1.8546	1.69357	0.290905	0.654125	0.974263	1.21794	0.266864	4.94626	1.31143	0.253745	0.758241	0.984587	0.504489	0.388401	5.29997	0.0530558	1.3536	0.628646	1.01293	0.0715729	0.205816	0.523103	8.72502	2.07865	0.781638	0.247545	0.742627	0.908248	3.69531	0.641168	1.49287
TCGA-C5-A7UC-01	1.57955	0.200989	0.736952	0.0170833	0.186949	1.32983	0.395047	0.884431	2.31147	0.074627	0.928431	2.23784	2.17847	0.186846	0.15064	0.240132	7.65783	0.261042	0.509402	2.49393	0.216162	0.369101	3.72013	0.34362	0.355313	2.49974	1.00232	0.109089	1.23463	0.487742	0.430162	0.357534	6.28326	0.0219151	0.947338	0.603201	0.683098	0.0257627	0.0964777	0.291525	3.09309	1.14551	0.796344	0.141898	1.76928	0.31483	3.57749	0.333959	0.924416
TCGA-C5-A7UE-01	0.193659	0.563364	3.59424	0.0545959	0.133595	3.47365	0.815145	0.746434	0.461972	0.219766	0.499378	7.24821	2.17944	0.15889	1.08321	0.600596	5.92833	0.75334	1.88341	1.48614	0.121645	0.769301	0.906789	0.76394	0.852157	3.51878	1.67127	0.280423	0.399779	0.663319	0.696159	0.7108	5.40963	0.027406	0.710819	0.548608	1.08917	0.0491187	0.0627383	0.619766	11.0091	2.75312	1.53211	0.340115	4.23592	0.161064	3.08661	0.278423	1.74561
TCGA-C5-A7UH-01	0.794733	0.213408	2.7735	0.037991	0.482454	4.94285	1.94628	1.24317	1.01833	0.252029	2.26452	8.79718	2.49153	0.629035	0.599142	0.260164	5.77023	1.6076	4.34193	1.52899	0.199682	0.252563	3.68891	1.09726	0.437133	2.39812	2.80771	0.186615	0.59967	0.300371	0.519433	1.52906	7.56534	0.0610542	0.388939	2.34986	1.60384	0.0632894	0.0871417	0.329144	2.80843	1.82792	1.53414	0.145644	6.27232	0.974321	5.44623	0.0888679	1.11012
TCGA-C5-A7UI-01	0.80278	0.259481	1.98091	0.0273331	0.207673	5.43889	1.6497	0.55209	0.957514	0.124795	0.503146	1.57901	2.50958	0.172196	0.759222	0.288156	1.61907	1.01203	1.11625	1.13281	0.202326	1.00395	2.81467	0.659746	0.553701	3.14739	1.14264	0.0785437	0.301601	0.438965	1.05667	0.481843	15.4509	0.0450821	4.047	1.1055	0.786923	0.00638572	0.172269	0.587711	7.09705	10.8507	1.88769	0.987605	3.18468	1.1059	2.67561	0.641198	2.42269
TCGA-C5-A7X3-01	1.02452	1.78823	1.26765	0.0389293	0.38165	2.61336	0.757935	1.00307	1.96916	0.172006	0.726516	3.79013	1.72949	0.227451	0.224238	0.564862	2.97545	1.85986	10.4327	1.96001	0.114408	0.488383	6.54925	0.606224	0.299473	1.47927	2.87352	0.144344	0.670955	0.363019	0.502215	0.721749	6.58711	0.0994196	1.37884	1.19721	1.41227	0.0740445	0.104678	0.30859	8.07292	3.12613	0.583587	0.140817	2.35646	0.271404	3.90188	1.26019	0.68497
TCGA-C5-A7X5-01	0.296512	0.0241278	0.384836	0.0214762	0.0836784	3.92418	1.39248	1.22856	3.39884	0.102663	0.625581	4.16799	3.14193	0.201647	0.131107	0.255437	1.79845	0.454386	0.636109	1.48588	0.150506	0.249853	2.1402	0.830732	0.213927	1.77109	0.545218	0.0369226	0.470111	0.244086	0.330338	0.53458	1.66159	0.0572201	0.604632	0.692026	0.958666	0.0409846	0.122593	0.253724	4.2303	0.662051	1.27954	0.0514577	0.709144	0.518952	1.36773	0.32295	0.201137
TCGA-C5-A7XC-01	0.269983	0.707721	1.0095	0.0472753	0.31928	4.19399	2.0416	2.89724	0.578325	0.269806	1.04429	4.82113	2.40281	0.214066	0.539329	0.53162	3.17877	0.925217	2.31679	2.59503	0.228809	0.40857	2.59116	1.33128	1.00314	4.73979	1.87228	0.143396	0.713835	0.675718	0.756256	0.610776	5.65776	0.167644	1.33702	0.51216	1.0208	0.0688981	0.228273	0.145215	3.13225	1.80542	0.411932	0.397589	1.95686	1.06331	5.7674	0.616119	1.8534
TCGA-C5-A8XH-01	0.315135	0.129285	1.62466	0.0659878	0.226452	3.48281	0.686677	0.849662	0.331129	0.155131	0.694114	2.50468	1.10829	0.0443602	0.973939	0.588208	3.27235	0.868336	2.1972	1.68177	0.164957	0.417286	1.22966	0.744586	0.495245	4.88883	1.77058	0.190135	1.41139	0.982211	0.493471	0.45085	2.25401	0.111492	0.321304	1.16241	1.32493	0.0279323	0.071988	0.148313	3.86194	2.33716	0.831051	0.210555	2.59572	1.04757	7.68931	0.429996	1.92037
TCGA-C5-A8XI-01	0.883139	0.210798	1.84454	0.0631453	0.233538	4.92129	1.01381	0.848918	0.250801	0.354658	1.57514	2.10575	1.7748	0.298358	0.89488	0.228241	6.06552	1.29784	2.84191	2.12385	0.164366	0.857568	1.52823	1.77818	1.09874	3.95197	2.48095	0.0979269	0.838211	0.538924	0.120253	0.601237	4.0197	0.0862952	0.570271	1.13363	0.641156	0.0688445	0.132048	0.221672	10.3059	2.39022	1.04803	0.382136	1.74805	0.739033	4.89403	0.458499	3.67272
TCGA-C5-A8XJ-01	3.02011	1.80946	1.80299	0.066673	0.380839	5.28038	1.18051	1.24255	1.81495	0.222123	0.690855	6.35878	1.76207	0.13322	0.65154	0.237795	2.8995	1.28432	1.57913	2.89573	0.215317	0.172004	0.198337	2.08169	0.732347	6.15084	2.21137	0.133446	1.12116	0.338807	0.291845	0.581547	6.25871	0.223218	1.15885	0.689965	1.16389	0.0947657	0.281221	0.122268	5.13203	4.49469	1.27174	0.123986	4.24725	0.985314	8.52956	1.45253	1.97731
TCGA-C5-A8XK-01	1.8622	0.34726	2.57107	0.0401561	0.255737	4.31941	0.505842	1.34859	2.22114	0.211753	1.05599	6.82728	5.05913	0.374478	0.503189	0.0891245	1.59027	0.894326	3.79771	2.4414	0.204582	0.776283	4.07195	0.807716	0.281813	3.119	1.55779	0.155205	0.797814	0.312268	0.704355	0.908473	4.38599	0.153379	0.421924	0.992183	1.00778	0.0825291	0.0966803	0.194758	2.72491	2.84985	0.668424	0.289659	3.92702	0.478017	11.1163	0.578426	1.42042
TCGA-C5-A8YQ-01	2.06022	0.117085	0.985623	0.0300628	0.248152	3.4563	0.834233	1.20525	0.189454	0.0635453	1.77086	3.66243	1.31439	0.28409	0.417522	0.0845157	4.49202	0.190818	1.49666	0.82179	0.102707	0.0866047	0.366166	0.725635	0.447113	2.82508	1.54338	0.166376	0.90787	0.29612	0.908387	0.730818	5.12881	0.0991689	1.20032	0.72375	1.25319	0.0307694	0.10798	0.338593	8.11088	0.387419	0.737346	0.349593	1.27819	0.982146	3.82616	0.809712	1.52265
TCGA-C5-A8YR-01	1.30527	0.175251	2.18885	0.0205702	0.263698	3.24042	0.618384	2.23483	2.57993	0.205807	1.02177	4.01496	3.14775	0.0179987	0.65753	0.3534	3.1834	2.82891	5.36038	2.30765	0.130141	2.22219	1.06292	1.42516	0.395603	6.09556	3.49499	0.0510827	1.3539	0.579955	0.243747	1.65029	9.71907	0.14702	0.988607	1.20503	1.2852	0.0053397	0.213753	0.456338	6.26194	2.16596	0.722853	0.227815	22.2852	1.52785	3.07216	3.29146	1.72531
TCGA-C5-A8YT-01	1.92179	1.2287	2.27429	0.0299123	0.331434	6.03736	1.05054	2.60041	2.80679	0.680482	1.65187	2.44654	2.39083	0.161945	0.593474	0.512439	1.61622	0.533988	1.52697	3.12398	0.276772	0.565498	1.30414	1.31615	0.472199	5.09729	1.7276	0.107444	1.84573	0.240193	0.024922	0.975164	4.42716	0.410107	0.808645	0.918161	0.756895	0.256861	0.315475	0.40198	2.14255	3.19078	0.168934	0.407628	2.36167	0.906755	5.81794	0.816216	1.35661
TCGA-C5-A8ZZ-01	0.599757	0.342235	1.7125	0.0330813	0.584407	3.95419	0.363373	1.05038	0.34746	0.13519	0.850609	12.2421	3.07351	0.166438	0.619885	0.348756	4.56055	0.738808	0.600443	2.21214	0.188366	0.317668	1.00733	1.25689	0.433568	5.5461	2.18358	0.140832	1.0033	0.177094	0.318498	0.954207	3.97779	0.0454692	0.978396	0.504399	0.901157	0.0967105	0.0803353	0.310492	6.40105	2.46086	1.32858	0.14884	2.28786	0.568092	3.13268	0.155688	1.6827
TCGA-C5-A901-01	0.055149	0.475124	0.765472	0.0194344	0.142666	1.51323	0.33413	0.729237	0.300703	0.0793011	0.684385	1.57398	0.44332	0.219584	0.25147	0.166283	3.67948	0.411186	0.867618	1.5498	0.0481129	0.109538	0.449096	0.441899	0.355341	4.66359	1.13406	0.0863321	0.480905	0.238834	0.878599	0.297913	2.84007	0.0445973	0.253029	0.15867	0.775418	0.0219968	0.111664	0.207639	2.08806	0.685219	0.741719	0.126334	0.829058	0.140149	1.70365	0.15417	0.477352
TCGA-C5-A902-01	0.181151	0.229708	1.77204	0.042558	0.119759	4.70979	0.481374	2.07258	0.648201	0.166616	1.33325	2.07241	2.36632	0.174856	0.201915	0.0780284	4.85817	0.822131	1.81358	2.22718	0.189647	0.559699	1.26004	1.22822	0.616817	2.38781	1.3842	0.165421	0.494313	0.511121	0.517996	0.536202	4.09907	0.0732454	0.523308	1.67049	1.71468	0.00247023	0.323526	0.198929	3.36311	1.73606	0.597147	0.253596	0.658119	0.172051	1.62205	0.289378	0.955208
TCGA-C5-A905-01	0.175548	0.229152	2.87754	0.0304831	0.36835	5.83526	1.17555	1.91383	2.41291	0.193301	1.04682	11.8385	2.17554	0.338897	0.764894	0.428487	4.13379	0.663921	1.08797	3.17026	0.193992	1.23975	5.30124	1.08203	0.90121	3.99901	2.74196	0.166031	0.416544	0.581706	0.597591	0.79242	4.99962	0.0561927	0.387801	0.738186	1.25834	0.0668278	0.114836	0.385554	3.41965	2.31643	1.12264	0.335118	4.55233	0.34698	6.95124	0.630965	2.88179
TCGA-C5-A907-01	1.1593	0.235837	2.5913	0.0753554	0.430161	3.20421	0.403281	0.765978	0.861974	0.256672	1.52868	3.35057	2.25918	0.729054	0.320375	0.575013	1.82683	1.77656	3.8185	1.30998	0.183889	0.744285	3.07533	0.649598	0.281563	2.50767	2.20275	0.199354	0.700204	0.51174	0.373115	0.691499	4.19392	0.0994306	0.429815	0.824142	1.07506	0.106348	0.126941	0.264535	5.06983	2.48697	0.138965	0.174364	1.39951	0.200194	3.36581	0.561186	0.692035
TCGA-DG-A2KJ-01	0.252073	0.0282036	12.8955	0.0386217	0.184759	4.80321	2.89369	1.55134	0.579843	1.13638	0.44688	9.51647	1.26644	0.410591	0.689644	0.108577	0.370986	0.0817144	2.11803	1.0217	0.153939	1.16824	4.23371	1.16528	0.247588	1.89136	2.20938	0.0123314	1.18877	0.0744309	0.463369	0.233166	34.5676	0.541459	4.56188	2.03626	0.764446	0.0232021	0.192378	0.949069	9.95897	39.8052	7.60306	1.63609	9.44988	0.252352	0.827603	4.60556	1.41069
TCGA-DG-A2KK-01	0.560564	0.125439	2.01041	0.0373424	0.113489	8.26034	2.08284	1.69709	0.348841	0.352355	0.416366	5.44151	1.76327	0.082339	0.533441	0.0419923	1.65001	0.0948094	1.6383	1.66618	0.153093	1.09727	0.843505	2.31345	0.541973	6.11878	2.56343	0.123998	0.728672	0.4174	0.238944	0.295781	6.4468	0.172455	0.298193	0.906195	1.3909	0.0787667	0.826016	0.229408	4.97504	2.51414	1.85106	0.409431	2.10675	0.191441	4.20463	0.817602	2.19689
TCGA-DG-A2KL-01	0.245525	0.209779	1.73493	0.0123115	0.223266	4.66143	0.512459	1.17744	0.235801	0.31922	0.669095	5.3382	0.897124	0.0969517	0.284976	0.499941	3.54779	0.940631	1.4046	1.15197	0.132415	0.325112	0.522567	1.01807	0.492837	4.33626	1.70052	0.0480442	0.500494	0.694218	0.255299	0.574792	2.02026	0.0428684	0.159302	0.187716	0.652285	0.04459	0.140448	0.105047	3.64985	1.24475	0.538587	0.119306	1.00663	0.319708	3.99721	0.730941	1.07259
TCGA-DG-A2KM-01	0.381264	0.973615	1.01392	0.0164939	0.23207	4.64956	0.915399	0.940149	0.512073	0.235332	0.816878	1.57185	1.30706	0.0865918	0.340882	0.0966027	2.7506	0.29081	0.577361	1.68471	0.211312	0.267274	0.593556	0.635882	0.262577	4.08414	1.63305	0.0526627	0.734378	0.189837	0.238198	0.607417	6.80728	0.138289	0.891786	0.268031	1.16242	0.0235486	0.0405198	0.25332	1.51369	1.61361	0.141945	0.196941	1.55932	0.963715	7.67122	0.438873	2.59724
TCGA-DR-A0ZL-01	0.418379	0.0715935	2.45949	0.0354449	0.50508	3.51401	1.4126	0.844724	0.855465	0.0956448	0.674284	6.61498	2.96751	0.15441	0.56858	0.46643	4.46718	0.223384	1.9711	2.44722	0.180354	0.130353	3.05628	0.455077	0.415771	4.9808	2.00774	0.178184	0.823388	0.901095	0.764053	0.415227	5.01198	0.0422913	0.627308	0.511994	1.357	0.00604075	0.102728	0.115825	13.7341	1.62847	3.8454	0.150339	2.6823	0.742926	12.0467	0.638852	3.12921
TCGA-DR-A0ZM-01	0.652942	0.0913196	1.03576	0.0308461	0.211139	2.95837	0.589924	0.597024	0.0834424	0.126878	0.412158	3.06656	0.76544	0.124738	0.198487	0.187498	0.720722	0.881935	2.43188	1.0586	0.132916	0.288198	1.57852	0.0670757	0.681944	2.87993	0.678681	0.106473	0.677824	0.16602	0.422314	0.0684497	4.54281	0.0247507	0.776678	0.84296	0.487534	0.0280096	0.0457635	0.12804	2.03029	1.58796	0.204475	0.425872	0.869101	0.419017	2.5335	0.23903	1.0069
TCGA-DS-A0VK-01	0.368848	0.134668	0.41573	0.0184412	0.170748	3.75832	0.6438	1.13876	0.959273	0.149382	0.206495	8.03733	1.83363	0.0702692	0.719963	0.334477	1.92378	0.113276	0.583057	2.65429	0.162588	0.79688	3.12221	1.26836	0.742877	5.95241	0.85076	0.0607797	0.981154	4.21507	0.428229	0.51716	3.84746	0.0883053	0.732343	0.524166	0.615488	0.017604	0.126992	0.0913641	7.22237	1.20041	1.61263	0.274237	2.45873	0.550148	8.36689	1.09315	2.46835
TCGA-DS-A0VL-01	0.363349	0.157195	1.32567	0.0274644	0.334206	4.16645	0.41711	0.902989	0.487041	0.135561	0.7886	4.86566	1.50909	0.116908	0.176726	0.177376	3.80271	0.266984	0.640919	2.19926	0.101438	0.160377	3.2301	0.895831	0.709964	3.60559	2.87439	0.0995399	1.276	0.267028	0.910352	0.505488	2.00349	0.0661116	0.19758	0.428882	1.0418	0.0457488	0.140349	0.296407	5.82188	1.0569	0.977363	0.120229	1.86627	0.37681	9.80383	0.25152	1.96655
TCGA-DS-A0VM-01	0.337326	0.443472	1.0702	0.0245498	0.112715	4.48868	0.941199	0.625771	0.280204	0.157315	0.434922	2.46779	2.75399	0.0559632	0.17945	0.635682	2.81325	0.410066	0.437216	1.95971	0.250146	0.36292	3.73414	0.519794	0.944276	2.29161	1.42144	0.0701332	0.450232	0.273911	0.947351	0.377549	1.74374	0.0213113	0.322434	0.709232	0.581243	0.0104935	0.145796	0.377047	5.55299	2.95457	1.92648	0.281727	1.20437	0.409136	5.92767	0.345207	1.76823
TCGA-DS-A0VN-01	0.327721	0.728771	2.04696	0.0188296	0.109506	2.59675	0.457201	0.740494	0.265246	0.135324	0.673422	2.84152	1.19372	0.103797	0.0747176	0.20292	1.70822	0.43823	0.703064	0.769315	0.100068	0.162732	0.792283	0.807992	0.313844	2.69158	0.649057	0.108217	0.379091	0.298368	0.435088	0.287983	4.77863	0.0434795	0.187952	0.235724	0.677633	0.0315617	0.0638039	0.173516	1.75334	1.71043	0.429421	0.156403	1.53188	0.268146	2.73884	0.204499	1.41221
TCGA-DS-A1O9-01	0.246106	0.287162	0.55771	0.0242405	0.112173	3.17995	0.213011	1.00151	0.473263	0.138002	0.623289	7.23992	2.54359	0.0593886	0.0855011	0.318022	2.4147	0.718023	0.729107	1.49152	0.141094	0.209496	0.930486	0.585101	0.578766	3.20837	1.46966	0.0515978	0.9698	0.366806	0.545754	0.515133	2.40038	0.0515316	0.573541	0.241214	1.11468	0.02505	0.11609	0.0496396	3.79091	1.65591	0.250334	0.120809	1.16277	0.517126	3.61508	0.203591	0.855236
TCGA-DS-A1OA-01	0.494062	0.208109	1.54441	0.0258265	0.446082	3.16025	0.759925	1.05885	1.05973	0.338839	0.562065	2.47787	2.45302	0.24546	0.75978	0.838726	3.0511	1.84655	0.62348	2.39517	0.182553	0.615731	3.13581	1.2181	0.945426	5.76393	4.82023	0.113739	1.01371	0.600701	0.73606	1.24305	5.66918	0.09107	0.859311	0.630339	0.881361	0.0689571	0.188304	0.30091	3.23732	0.965726	0.632293	0.477125	1.51822	1.23093	8.0758	0.684779	2.91458
TCGA-DS-A1OB-01	0.554179	0.361698	1.64829	0.0191046	0.191149	3.65487	0.957207	0.639895	0.165249	0.152555	0.774059	3.42024	1.71696	0.0612931	0.168464	0.228759	1.40466	0.194619	1.25493	2.19003	0.257854	0.21403	7.68596	1.48018	0.273974	2.21955	0.731706	0.158144	0.83829	0.913631	0.320705	0.300732	2.05396	0.0886958	0.565027	0.603026	0.547477	0.0291258	0.149611	0.23908	0.620856	2.84898	0.191814	0.0881597	1.31908	0.458771	2.86705	0.230539	0.585816
TCGA-DS-A1OC-01	0.267132	0.79952	1.05938	0.0583238	0.201556	4.83566	0.468504	1.48432	0.182069	0.269923	0.408999	3.9568	2.41579	0.40289	0.771448	0.230128	1.86746	0.627823	0.955135	2.87827	0.361229	0.707448	2.03938	0.740936	0.443422	7.51634	0.990579	0.117613	0.689318	0.368096	0.627455	1.28984	2.5794	0.0776327	0.885175	0.872034	1.50976	0.0387037	0.26628	0.125721	2.41861	2.49896	4.91363	0.114739	1.81967	0.221143	7.10606	0.666764	1.65443
TCGA-DS-A1OD-01	0.543177	0.804736	2.71862	0.0596914	0.526529	4.73966	0.872007	1.1435	0.765958	0.50372	0.579584	1.50221	2.33375	0.0813572	0.922391	0.645425	2.71985	1.06863	3.97803	1.53858	0.189551	1.71132	1.35367	1.26992	0.975778	7.52825	5.96054	0.139275	0.826648	1.09506	0.902846	1.36108	9.01729	0.141999	0.649294	1.26018	0.934653	0.0793052	0.182037	0.246822	10.5245	2.45169	7.4832	0.707962	3.39295	0.995246	5.84761	2.21412	3.54434
TCGA-DS-A3LQ-01	0.284066	0.572099	1.29984	0.0120527	0.139434	3.45867	2.6896	1.21109	0.409562	0.268351	1.53545	7.42058	3.60089	0.179281	0.464977	1.0071	2.78715	0.368343	0.359395	1.91305	12.7801	0.810163	1.57923	0.35018	0.551157	3.95265	0.515637	0.0983443	1.18993	0.0645214	0.642684	0.349268	1.1935	0.112649	0.245069	0.280491	0.584354	0.0387362	0.144303	0.0617034	4.20862	3.25167	2.16092	0.0917699	2.71005	0.447606	7.03722	0.506139	1.74137
TCGA-DS-A5RQ-01	0.302252	0.112727	2.55712	0.0144075	0.133213	1.8174	0.492615	0.822014	0.26323	0.07831	0.595375	3.37291	0.877383	0.064833	0.285852	0.448436	4.81082	0.239509	1.05669	1.53362	0.0468782	0.311288	0.683703	0.952195	0.253333	2.11123	1.81141	0.0262864	0.621563	0.218161	0.521313	0.328042	2.04394	0.0305527	0.205446	0.178383	0.851809	0.0322858	0.0815987	0.189666	4.34905	1.29063	0.5181	0.179509	0.820403	0.263794	3.93933	0.509654	1.36323
TCGA-DS-A7WI-01	0.525791	0.392194	2.47438	0.0150378	0.0846334	2.72514	1.18482	0.82346	0.848128	0.122604	0.203375	1.82355	1.26799	0.0930454	0.383603	0.271774	0.928595	0.295439	1.30345	1.25026	0.097858	0.742643	6.38685	0.604954	0.421413	3.11346	1.25256	0.240069	0.199617	0.213905	1.00233	0.269764	3.69235	0.0354326	0.786257	0.341342	0.686134	0.0138617	0.0676981	0.263951	3.84688	4.17295	2.41265	0.294426	2.01559	0.188955	3.00267	0.293973	1.43333
TCGA-EA-A1QS-01	0.781724	1.86925	0.832602	0.0136883	0.211856	3.21746	0.356106	2.33442	1.99419	0.47567	0.813516	2.46911	0.987479	0.037728	0.149371	0.221272	2.03802	0.999166	1.29372	1.67778	0.171472	0.236599	1.31864	1.1564	0.314147	4.99131	2.27386	0.0961509	1.95558	0.219833	0.346703	0.489222	2.50955	0.0880503	0.250494	0.276815	1.16379	0.094568	0.130799	0.147162	6.50783	3.43982	0.477092	0.332569	2.09013	0.464395	2.98653	1.30228	1.07995
TCGA-EA-A1QT-01	0.161732	0.140744	1.6391	0.0242294	0.359504	4.59757	1.81078	0.604165	0.851235	0.356176	1.17006	12.9973	3.61138	0.294879	1.68253	0.325099	1.28712	0.640796	0.591127	1.48587	0.319822	0.690065	9.91437	1.32916	1.08586	6.96041	6.78488	0.0984594	0.75473	0.339595	0.734079	0.896278	9.66097	0.0799259	1.64898	1.31245	1.11967	0.0269553	0.275411	0.270636	8.44081	4.51749	3.02821	0.583182	1.77622	0.462209	2.84271	0.760721	5.25098
TCGA-EA-A3HQ-01	0.123612	0.22129	2.24098	0.0194806	0.146183	2.40477	0.292814	1.09548	0.186555	0.0933347	1.45716	1.55664	0.993669	0.230111	0.107362	0.365105	4.1583	0.721286	0.151535	1.86571	0.15406	0.140299	3.14567	0.957831	1.18083	1.87647	3.0003	0.120942	0.703943	0.309379	0.591516	0.603719	1.48811	0.123167	0.0360092	0.46117	0.657244	0.0491237	0.531378	0.0831086	2.84884	0.673537	0.272428	0.202263	0.517662	0.726178	4.46427	0.345562	0.505986
TCGA-EA-A3HR-01	0.276604	0.207796	1.31632	0.0187684	0.201036	3.51879	0.516616	0.753187	0.794498	0.204245	0.439421	3.7402	1.98527	0.190709	0.516518	0.417002	1.00803	0.448333	0.706429	2.31699	0.213735	0.235456	0.663675	0.46276	0.330677	2.94085	1.7317	0.0541256	1.46971	0.190573	0.468108	0.429839	2.06577	0.121826	0.120865	0.27985	1.19834	0.0356979	0.148939	0.148776	2.2767	0.730741	1.57872	0.211212	3.32656	0.304297	2.96031	0.733801	1.14992
TCGA-EA-A3HS-01	0.0443454	0.173658	1.56517	0.0332927	0.187373	6.2586	0.296956	0.739214	1.21654	0.186128	1.62236	2.96383	2.629	0.117712	0.188727	0.429777	3.58957	2.58758	2.26737	1.85731	0.139276	0.5872	1.94101	0.929328	0.736975	5.43166	3.19913	0.13884	2.69898	0.392823	0.235494	0.764598	4.99993	0.150167	0.384314	0.765523	1.38763	0.0622848	0.270749	0.229574	3.96636	1.70421	3.68375	0.211636	2.1166	0.884476	11.1644	0.788086	2.00523
TCGA-EA-A3HT-01	0.288277	0.16588	0.930916	0.0296561	0.195315	2.65237	0.696004	1.17891	0.27367	0.16485	1.30089	2.11268	1.48972	0.0944095	0.225341	0.59425	4.18208	0.947857	2.06148	1.34648	0.143713	0.190861	1.19473	1.47225	0.232991	3.34056	2.13798	0.0523806	0.740216	0.312111	0.740207	0.563783	1.81555	0.0291401	0.272926	0.58332	1.20918	0.0815689	0.152659	0.251963	3.96593	1.33871	0.513151	0.180818	0.920908	0.399595	4.40046	0.402943	0.903446
TCGA-EA-A3HU-01	0.152442	0.516562	0.69091	0.0173507	0.0976501	3.93942	0.402772	1.10284	0.326543	0.154035	0.919562	1.46337	0.744005	0.0262759	0.145642	0.131325	3.05551	0.0282384	0.74751	1.58294	0.129194	0.201857	1.21922	0.67115	0.234435	2.64092	1.64447	0.0596596	0.651092	0.188624	0.195713	0.170821	2.9057	0.0990606	0.377464	0.163871	0.756496	0.0380114	0.092259	0.143489	3.75226	3.10226	0.430725	0.0665164	0.875748	0.238141	4.56947	0.113062	0.922995
TCGA-EA-A3QD-01	0.642267	0.643627	2.90144	0.0812918	0.250428	9.46431	1.46035	1.30416	0.475816	0.316892	1.28714	7.44523	2.52534	0.128033	0.254663	0.673579	2.38368	1.68374	1.49768	1.58457	0.146172	0.924413	3.80894	0.722902	0.936937	5.05127	1.75094	0.475393	1.2225	0.544201	0.4791	0.454611	10.0229	0.143959	1.02497	1.96531	1.83999	0.0456948	0.114822	0.893674	7.29376	2.24314	1.27031	0.383815	3.01202	1.55261	7.83464	0.356865	3.56726
TCGA-EA-A3QE-01	0.490112	0.276379	1.60157	0.0222276	0.317815	4.02948	0.500114	0.896277	0.247194	0.222473	0.853083	6.10515	1.45773	0.146655	0.452924	0.354664	3.05839	0.381311	2.35523	1.87527	0.294177	0.285553	0.578715	0.652516	0.531458	2.92604	1.50682	0.11125	0.823366	0.436084	0.432452	0.499048	3.45709	0.0435972	0.499706	0.485947	1.08638	0.0315453	0.0586258	0.36906	1.93635	0.946009	0.341217	0.187123	0.884147	0.615961	13.0603	0.407122	0.936222
TCGA-EA-A3Y4-01	0.672805	0.218549	2.06568	0.0259374	0.157206	2.61918	0.996584	0.659454	0.710034	0.097842	0.72755	4.07722	1.13402	0.0471357	0.0527806	0.130878	1.38414	1.47747	3.58516	1.31365	0.0984589	0.60351	2.87199	0.695621	0.353014	3.9259	2.00469	0.0806912	0.432584	0.196527	0.922039	0.266603	7.92539	0.0394894	0.265539	1.63313	0.634252	0.0729527	0.0932973	0.551573	3.83477	2.46458	0.721157	0.372882	1.37033	0.467976	4.74178	0.927421	0.861554
TCGA-EA-A410-01	0.660859	1.676	1.47263	0.0270011	0.2388	7.2997	1.48517	1.52726	3.46396	0.139423	0.750625	5.6163	2.087	0.0455639	0.975767	0.108441	1.66734	1.367	3.39809	2.25341	0.164727	1.41679	0.736764	1.35778	0.504445	3.70139	0.954777	0.080053	1.34408	0.00619477	0.488496	1.61148	7.85754	0.206768	1.95722	1.184	0.615993	0.0238166	0.231347	0.207348	5.18044	1.88227	0.124484	0.240298	2.60195	1.05661	1.52162	0.326759	1.53102
TCGA-EA-A411-01	0.727968	0.40725	1.99046	0.0328739	0.452628	7.85069	0.904095	1.83249	0.979266	0.262066	0.895362	10.0076	1.42446	0.134062	0.524117	0.387828	2.4435	1.34139	2.30148	1.85835	0.173815	0.761006	1.91102	1.9601	0.409442	5.64859	3.3065	0.16494	1.02276	0.482697	0.735606	0.572715	5.05234	0.0503481	0.703154	0.729243	1.69008	0.0957413	0.324631	0.216382	13.7917	2.89503	2.19003	0.55587	1.51194	1.18315	7.20448	0.749757	1.48092
TCGA-EA-A439-01	0.522305	0.183109	2.14037	0.0549509	0.285245	6.91806	1.03262	0.81555	2.97249	0.499343	0.533124	4.17642	1.22459	0.634395	0.179944	0.0824913	0.871191	0.993318	0.996004	0.842093	0.285552	0.668557	0.567106	0.987262	0.889222	6.89175	2.34765	0.146493	1.17117	0.19535	0.156464	0.345276	5.70557	0.124952	0.248514	0.986411	1.11837	0.0798886	0.292859	0.393302	4.87224	3.02847	0.0344346	0.272532	1.64234	1.12621	1.9019	1.12638	1.65766
TCGA-EA-A43B-01	1.41394	0.450635	1.2574	0.0144426	0.0517259	4.10397	1.14768	0.687111	0.525656	0.0765977	0.151919	1.98135	0.947176	0.103395	0.364698	0.0553671	0.798753	0.305572	0.949836	2.19976	0.0299042	0.453885	4.66674	0.264095	0.175072	3.28441	1.2133	0.0419212	0.503254	0.126516	0.31505	0.386818	5.85064	0.0433111	0.830025	0.853446	0.649695	0.0265844	0.0587264	0.483962	4.77277	5.00176	0.440671	0.588914	4.23508	0.118784	8.24862	0.393561	1.41953
TCGA-EA-A44S-01	1.28271	0.120155	3.33606	0.0338218	0.344689	7.01805	1.19855	1.04487	0.12199	0.150711	0.480765	4.87117	1.73851	0.129573	0.943085	0.0770947	1.63904	1.60525	1.42924	0.983388	0.176968	0.592502	1.24496	1.47093	0.454733	5.91625	3.1174	0.180954	0.860005	0.446283	1.0236	0.520957	13.1975	0.0391999	1.39907	1.24118	1.59548	0.0650845	0.102215	0.224627	15.3703	1.26707	1.3098	0.569458	2.33191	0.390524	2.05672	0.309742	3.64156
TCGA-EA-A50E-01	0.404529	0.090523	2.03206	0.0382213	0.220925	1.88424	1.22546	0.810902	0.356132	0.11267	0.934478	4.60357	1.35493	0.366068	0.225449	0.348492	4.79598	0.83053	0.79552	1.48477	0.258807	0.624935	3.36284	0.831133	0.47415	4.8127	1.06823	0.125334	0.695908	0.205715	0.908869	1.01779	5.024	0.109043	0.446819	0.537176	0.855037	0.0287307	0.0672065	0.349038	1.55383	2.01633	7.48091	0.20593	1.81173	0.420554	6.41937	0.121165	2.1029
TCGA-EA-A5FO-01	0.658598	0.0327504	1.88632	0.0403632	0.233476	6.1539	0.816714	1.41027	0.137158	0.338427	0.86094	4.01842	2.27945	0.0882934	0.311432	0.204882	2.40527	0.284664	1.49139	1.89825	0.114914	0.484491	1.48977	0.676568	0.727382	6.26235	2.98493	0.136034	0.573002	0.424948	0.298928	0.503605	3.02622	0.262595	0.44766	0.583036	0.746463	0.0546335	0.378398	0.344397	7.52897	2.28363	1.24471	0.181603	2.79146	0.473364	5.2201	0.832891	1.82376
TCGA-EA-A5O9-01	0.0889601	0.245519	1.05838	0.0109041	0.086939	3.21697	0.642994	1.19718	0.101054	0.0760603	0.344095	1.60694	0.41715	0.200361	0.0901428	0.31932	2.73491	1.23043	0.911824	1.42626	0.0827844	0.157062	2.08274	1.1332	0.35417	1.92429	2.73902	0.052223	0.232195	0.210142	0.872158	0.667078	2.29064	0.0629469	0.272105	0.511899	0.670373	0.0121309	0.103456	0.111647	6.3622	0.882541	0.234599	0.124537	0.523793	0.17355	3.7704	0.272375	0.38058
TCGA-EA-A5ZD-01	0.292752	0.429456	1.31578	0.00996765	0.185124	3.43792	0.850542	1.0936	0.188446	0.141585	0.650057	1.43368	1.17666	0.0392471	0.494407	0.420331	5.58517	0.295249	1.20957	1.67879	0.147566	0.258432	0.529773	1.32326	0.41662	5.25071	1.75448	0.120936	0.578873	0.320158	1.62109	0.534367	3.42641	0.0263044	0.298483	0.691106	0.842974	0.0332672	0.0871402	0.153088	5.85447	1.34406	0.57902	0.310477	1.16137	0.470927	5.62134	0.558588	1.52427
TCGA-EA-A5ZE-01	0.401112	0.291715	1.77629	0.025607	0.213294	5.10392	0.490305	0.869881	0.387297	0.158484	1.002	4.49222	2.35111	0.161322	0.629989	0.187172	2.39413	0.823514	0.525867	1.86061	0.186633	0.177044	1.22489	0.782907	0.950796	3.36212	1.71277	0.0915709	0.761412	0.223717	0.518868	0.499649	2.37341	0.0743341	0.477125	1.42037	1.34544	0.0531016	0.164514	0.377553	3.15478	2.38564	0.34378	0.357334	0.766306	0.509668	4.46957	0.200236	1.22714
TCGA-EA-A5ZF-01	0.396691	0.665768	2.49086	0.0121559	0.302161	10.1121	2.57208	1.37182	1.17162	0.488197	1.02293	6.37744	2.59093	0.19943	1.38678	0.185109	0.681132	0.514382	0.425512	2.42965	0.323008	3.06413	2.35549	0.611272	0.527305	9.4523	4.43532	0.187592	1.60017	0.507577	0.675196	0.680056	7.7382	0.347524	1.31448	0.614562	1.2577	0.0151013	0.444854	0.124464	9.17863	4.15512	0.274608	0.492229	6.31136	0.890999	6.15686	3.94737	2.83176
TCGA-EA-A6QX-01	0.38729	0.122776	0.767945	0.0346145	0.144717	5.92841	0.617491	0.944326	0.824892	0.10536	0.551357	3.94099	1.81607	0.0700935	0.392439	0.208525	2.81829	0.376644	1.50016	2.99998	0.191465	0.128208	0.788457	1.19357	0.626392	3.56042	5.0918	0.0757847	0.815585	0.374838	0.685563	0.425113	4.0796	0.212055	1.18461	0.599998	0.889782	0.0316873	0.136728	0.334164	3.38255	0.932564	0.370234	0.271087	0.788418	1.36696	6.09765	0.489784	1.29081
TCGA-EA-A78R-01	0.441171	0.139857	2.53687	0.0191518	0.0443829	3.05434	0.703397	0.605083	0.150344	0.240035	0.379208	9.00511	0.369415	0.0621017	0.312925	0.126686	2.45287	1.47781	0.446933	1.659	0.192443	0.243407	1.23495	0.181283	0.277326	4.04084	1.26414	0.151074	0.235534	0.398038	0.450542	0.440727	4.64716	0.0185813	0.337355	0.488193	0.831128	0.031333	0.0801652	0.380654	6.81865	3.62246	0.596255	0.308802	1.78239	0.322751	2.74327	0.528559	1.40455
TCGA-EA-A97N-01	0.543426	0.382185	2.55531	0.049957	0.368185	3.42205	0.742655	1.20126	0.13228	0.274551	1.45135	2.44003	1.63814	0.112402	0.377589	0.434708	3.7704	0.100664	4.63551	1.44742	0.36573	0.256992	0.553161	1.05271	0.564259	4.29786	2.77408	0.136719	0.870379	0.328562	0.2537	0.643412	3.21045	0.011771	0.474912	0.652892	1.16645	0.0370516	0.0967308	0.182681	5.21837	1.35713	0.460634	0.266757	0.831524	0.478267	3.997	0.27903	1.74941
TCGA-EK-A2GZ-01	0.327767	0.0366729	0.389952	0.0156935	0.130719	1.54057	0.509524	0.697373	0.600378	0.0525448	1.04989	5.22498	1.77025	0.0444906	0.236639	0.255892	1.82906	0.292194	0.703162	1.81008	0.150124	0.406888	1.29285	0.404053	0.336424	2.99106	1.45023	0.0280601	0.444766	0.181466	0.234311	0.433552	0.991026	0.0393442	0.208865	0.480582	1.10131	0.112437	0.134007	0.212105	5.71039	0.923409	0.939998	0.179889	0.908481	0.359682	3.81534	0.310882	0.703148
TCGA-EK-A2H0-01	0.465944	0.257921	4.12354	0.0255502	0.44831	9.42057	0.672516	0.503659	0.117001	0.234453	0.743037	11.5706	3.59768	0.248548	0.760392	0.612662	1.10682	2.09873	0.561176	1.39157	0.273851	0.649454	5.4918	0.393003	0.354562	6.14676	0.942444	0.167955	0.44515	0.0917213	2.12376	1.0235	6.50589	0.138819	0.475066	1.69336	0.83836	0.00234086	0.15431	0.738656	2.11269	2.02661	1.09618	0.749034	6.09214	0.373924	5.3579	0.9304	2.93514
TCGA-EK-A2H1-01	0.470708	0.724933	3.20634	0.00678778	0.119381	4.48113	0.77698	1.11397	0.632206	0.163564	0.68722	5.00158	5.00801	0.0668164	0.404018	0.405503	3.64039	1.02325	1.34642	1.63104	0.164262	1.17325	2.50845	0.511996	0.271962	3.22301	1.45612	0.0812717	0.354782	0.272527	1.40253	0.610588	7.10798	0.0643742	0.451692	0.931455	2.90842	0.035303	0.148352	0.390937	7.536	2.3282	1.30339	0.570858	2.94495	0.341162	7.00813	0.243272	2.71896
TCGA-EK-A2IP-01	0.778266	0.120107	2.36269	0.0320723	0.370264	9.34787	0.633266	1.24957	0.548734	0.187734	0.458467	20.3603	3.23594	0.174853	1.14213	0.554861	1.84318	1.21795	4.20284	1.31254	0.0749212	2.45198	2.15809	0.793987	0.596776	7.89125	1.51988	0.231062	0.831007	0.824121	1.0305	0.285971	16.0191	0.0596807	2.24369	0.688975	0.680686	0.118752	0.0484865	0.378908	8.3055	1.35704	2.84504	0.368862	3.40906	0.504264	3.30013	0.471573	2.53117
TCGA-EK-A2IR-01	0.713186	0.0628697	2.34835	0.0463577	0.23854	7.75298	0.468621	0.45906	0.338788	0.188138	0.599087	0.390385	5.16839	0.0990884	0.315346	0.102399	2.39612	0.210176	1.42182	3.83087	0.0754177	0.486492	0.945952	0.106567	1.26514	4.88227	0.509985	0.126869	1.03074	0.0808312	1.64207	0.745253	1.36591	0.048061	1.10174	0.956609	1.10823	0.0363959	0.0161571	0.162739	9.89034	7.34378	7.36918	0.173276	4.0855	0.349499	6.65045	0.699101	2.39958
TCGA-EK-A2PG-01	1.01449	0.0306778	0.826385	0.0294068	0.416121	2.88397	1.76612	1.51194	2.22384	0.138525	0.919138	15.2149	3.74691	0.324206	1.18356	0.330686	0.887769	0.67551	0.647035	1.91889	0.334887	1.08919	5.91688	0.642201	0.741136	5.36006	2.25531	0.128766	0.624569	0.188908	0.56002	0.64521	14.6121	0.177381	2.65576	2.00251	0.551819	0.0183205	0.216941	0.619396	8.75638	3.10567	0.227765	0.293113	2.85439	0.789687	2.79882	0.886944	2.34053
TCGA-EK-A2PI-01	0.400704	0.5591	1.1591	0.0671727	0.191058	6.0544	1.42808	0.875352	0.554249	0.315118	0.592614	3.71275	2.22634	0.295773	1.04613	0.345197	1.34135	0.779378	0.943912	1.98716	0.131607	0.624228	0.719793	1.24944	1.37613	4.21591	1.11243	0.175268	0.713098	0.547511	0.635488	1.16166	1.76561	0.0428872	1.24968	1.06419	1.50762	0.0639624	0.201181	0.510287	7.99318	4.67902	1.27737	0.638947	2.15263	0.965661	1.86434	1.30844	2.80002
TCGA-EK-A2PK-01	1.21604	0.238104	0.699263	0.0260845	0.230692	2.44074	0.155108	0.67997	0.476571	0.19849	0.37237	0.856678	1.77177	0.352136	0.0924157	0.170233	2.08799	1.57682	2.10877	2.27548	0.137917	0.322045	1.51634	0.637103	0.320102	3.25514	1.61926	0.113028	0.789891	0.239379	0.173862	0.391442	3.81911	0.0553149	0.340958	0.807394	0.796235	0.120429	0.0757603	0.200308	0.567184	4.29557	0.0360772	0.313389	2.31938	0.561873	3.07604	0.594909	0.96183
TCGA-EK-A2PL-01	0.6079	0.716436	1.57504	0.00620935	0.342475	3.4596	0.671999	0.952053	0.386705	0.21105	1.12342	13.5284	1.30311	0.0782369	0.813096	0.296758	2.18698	0.551777	2.49234	2.03685	0.212137	1.50258	2.1864	1.49877	0.490407	5.06255	3.27886	0.182395	1.15395	0.398885	1.25818	0.40186	5.34411	0.0819317	1.11564	0.825172	0.67038	0.00442108	0.23481	0.228878	4.67	2.59967	1.04202	0.649863	5.28516	0.386991	7.89874	2.46009	1.41524
TCGA-EK-A2PM-01	0.237043	1.2318	2.48591	0.0161417	0.0999307	1.7465	0.772674	0.663195	1.56176	0.1085	0.534844	9.3249	1.37619	0.0381343	0.656531	0.204206	1.47299	0.461053	0.414358	1.2668	0.183823	0.662637	11.6355	0.227276	0.434608	3.48241	1.29631	0.10823	0.262481	0.305895	0.193662	0.728928	5.32269	0.162403	1.20842	0.990943	1.87341	0.0265774	0.0426629	0.148747	3.94551	2.29073	0.406323	0.271506	1.04925	0.356973	1.04554	0.652141	0.558144
TCGA-EK-A2R7-01	0.636891	0.369495	1.19739	0.0224078	0.455629	5.94509	0.992886	1.08838	0.900327	0.273186	0.418183	6.40845	2.0384	0.108152	0.846137	0.121926	1.27293	1.26935	0.910886	1.32577	0.131706	2.24891	2.08897	1.83195	0.463379	11.8536	4.37355	0.110779	0.990693	0.329683	0.462521	0.394493	6.82846	0.262286	0.769611	1.1694	1.04702	0.143139	0.285099	0.555077	5.86349	3.5102	0.643834	0.441295	5.79785	2.42687	4.92133	2.13842	2.40082
TCGA-EK-A2R8-01	0.609676	0.0545718	1.59576	0.0084071	0.17349	2.51708	0.524912	1.12779	2.61788	0.334086	0.815547	1.10129	1.89911	0.272177	0.259468	0.354524	6.281	0.61268	0.980957	1.70508	0.0425513	0.484382	3.28917	0.977044	0.256299	2.36145	1.35648	0.0357903	1.95298	0.300037	0.498101	0.509808	3.54407	0.0369769	0.404047	0.404795	0.470636	0.0546628	0.115849	0.200853	4.38255	2.2285	0.62704	0.314242	1.99345	0.352126	2.17455	0.681746	1.37388
TCGA-EK-A2R9-01	0.930827	0.219867	2.05079	0.04437	0.156072	7.72536	2.35807	2.29509	0.942825	0.564732	0.23336	2.85839	1.0912	0.0811129	0.298681	0.233883	1.04014	1.08964	1.07242	0.985122	0.234598	0.513565	1.0791	1.78495	0.672495	5.5685	1.34232	0.151786	0.892676	0.697306	0.147871	0.137762	9.48226	0.138523	0.527249	1.28183	0.855414	0.153903	0.347947	0.730129	12.4997	5.45397	1.37055	0.947696	1.85604	1.23053	4.76934	1.0739	1.71326
TCGA-EK-A2RA-01	0.413916	0.977692	2.71756	0.0169116	0.206222	3.80334	1.21723	1.30038	0.50937	0.196608	0.466963	10.2017	2.17199	0.0610397	0.629128	0.257529	2.39159	0.477081	0.427545	0.987964	0.152468	0.88303	5.21983	2.80638	0.849243	11.0145	3.19379	0.16199	0.843009	0.344024	1.33388	0.428814	7.6974	0.0371912	0.539246	0.773568	1.02703	0.0495443	0.325205	0.454539	9.65289	4.24584	0.718604	0.465315	4.51126	0.626875	8.51068	3.66419	2.50516
TCGA-EK-A2RB-01	0.308012	0.0574375	3.35911	0.0298886	0.287734	6.64516	0.883963	0.707695	0.0437358	0.1616	0.918357	2.00297	2.06332	0.117685	1.63856	0.243233	1.51105	0.615731	3.08365	1.19294	0.179143	0.781722	1.48927	1.29731	0.490103	4.18495	3.18423	0.210951	0.904435	0.33853	0.901724	0.505239	8.17136	0.0518916	3.45446	1.17022	1.02608	0.0400764	0.0799556	1.40128	10.9155	6.0001	2.24389	0.676187	2.47918	0.359746	2.43622	1.04557	2.50517
TCGA-EK-A2RC-01	0.35496	0.293283	2.98861	0.0476921	0.230741	8.15116	0.313446	1.27904	0.260541	0.246187	0.572074	1.85451	2.08516	0.131779	0.381814	0.529251	2.41113	0.300946	1.13249	1.77073	0.152455	0.397711	0.611464	0.80783	0.746638	4.31895	1.82252	0.0801444	0.806622	0.607367	0.98154	0.691022	6.07196	0.049681	1.16924	0.495525	1.30983	0.037792	0.0629406	0.308411	11.4469	1.44381	0.637253	0.448267	1.92922	0.929388	3.96889	0.588838	2.09447
TCGA-EK-A2RE-01	0.177902	0.711598	0.864251	0.010903	0.199427	2.64412	0.992754	0.835228	0.606262	0.127906	0.903156	7.68036	2.6367	0.359538	0.43264	0.718396	3.01099	0.562286	0.763308	2.09109	0.131924	0.323907	0.633811	0.849813	0.445579	2.33597	1.12448	0.0652719	0.554043	0.271405	0.890235	0.520003	2.55067	0.0179829	0.45346	0.246079	0.686651	0.0545832	0.182876	0.251179	0.597919	0.97669	0.81808	0.178296	1.89716	0.229474	2.06421	0.293069	1.06861
TCGA-EK-A2RJ-01	0.409541	0.285715	0.840727	0.0295286	0.319912	3.61115	0.169003	0.579493	1.13294	0.132946	0.768751	3.93388	2.95323	0.0232535	0.263638	0.269795	4.79827	0.421711	1.68827	1.34748	0.0840684	0.191398	1.83917	0.623648	0.499743	3.6347	1.28314	0.0471404	0.866015	0.0663915	0.275547	0.313754	5.93995	0.0413979	0.491245	0.906385	1.76004	0.126968	0.0555319	0.498865	1.63918	1.54534	0.638478	0.128768	1.69308	0.630762	3.35072	0.837015	0.884416
TCGA-EK-A2RK-01	0.904427	1.05747	1.00428	0.0242503	0.14818	4.11312	2.04765	0.518447	0.20034	0.108962	0.641355	1.58471	4.54395	0.141862	6.36475	0.185046	0.84302	0.513079	0.258703	1.01421	0.149917	0.47904	12.6817	1.22642	0.611176	8.84032	1.75312	0.0707911	0.281668	0.28931	0.572656	0.388178	11.4853	0.0457114	1.7751	0.430355	0.374019	0.00154163	0.0239472	0.297957	3.17621	12.8381	6.86906	0.267613	6.6367	0.456197	5.82408	0.749475	2.9964
TCGA-EK-A2RM-01	0.174136	0.539045	1.77248	0.0186763	0.230243	5.6261	1.42522	0.722628	2.14624	0.191746	0.364842	7.8009	3.26622	0.231117	2.62912	0.275026	1.16751	0.997279	0.477347	2.01546	0.344351	0.999192	4.84499	1.07332	0.342077	4.66133	1.23276	0.0567914	0.526821	0.45705	1.23299	0.674367	3.14775	0.0440058	1.47954	0.334008	0.840147	0.0447212	0.0885985	0.163908	8.02647	4.97297	1.60727	0.620522	7.66798	0.661557	7.06856	2.15584	3.74218
TCGA-EK-A2RN-01	0.742166	0.146914	0.701848	0.0174941	0.108303	2.83563	0.309478	0.618375	0.107004	0.115372	0.174817	2.78436	0.45892	0.110212	0.156191	0.258202	0.644163	1.51755	2.98022	0.200542	0.169341	0.377977	1.10414	0.351884	0.224296	2.76696	2.65587	0.0670276	0.386071	0.089905	0.956159	0.0929414	5.12275	0.00865625	0.291036	0.315873	0.535137	0.158423	0.00889181	0.134341	6.97018	0.67634	0.666197	0.0544915	1.10498	0.193441	0.425991	0.125397	0.886062
TCGA-EK-A2RO-01	0.0649552	0.0872116	1.28798	0.0129379	0.0952193	2.74772	1.38776	0.708141	0.166018	0.0883532	0.565301	6.82875	0.848491	0.00783726	0.236948	0.153883	0.860376	1.13705	1.43994	0.868808	0.113336	0.602074	1.95051	2.12193	0.30879	5.25575	0.678807	0.0190656	0.635773	0.41556	0.689884	0.163426	3.24371	0.0164148	0.397361	0.373769	0.582004	0.0367586	0.064748	0.18342	7.12854	2.4118	0.501039	0.471193	0.891035	0.355149	1.18263	0.272376	0.620394
TCGA-EK-A3GJ-01	0.409258	0.851166	2.21493	0.0457377	0.182681	6.2081	0.537366	0.585865	0.336366	0.123499	1.39676	6.43596	1.69331	0.0755216	0.468365	0.186652	4.18082	0.624325	0.877984	2.1792	0.210026	0.223143	2.27899	0.652894	0.576955	4.0618	1.36341	0.131902	0.865416	0.374379	0.865404	0.37767	9.54243	0.0292018	0.564541	0.479519	1.35396	0.0129671	0.112487	0.24926	4.42536	2.76161	0.790404	0.330889	1.19429	0.333702	7.48001	0.326883	1.40834
TCGA-EK-A3GN-01	0.612183	0.0210755	4.29526	0.064936	0.194913	4.03193	1.50163	1.23212	0.481438	0.0585636	0.713408	5.63119	1.89273	0.102273	0.314933	0.111561	0.83167	3.32788	3.48535	1.42515	0.197199	1.77714	2.08516	2.55425	0.610543	7.06671	3.92108	0.244191	0.67043	0.171493	1.17343	0.355441	9.88412	0.209446	0.384103	1.34445	0.954232	0.099854	0.234704	0.487576	5.49102	2.81664	1.96523	0.260698	4.5484	1.62825	4.75773	2.12511	2.29805
TCGA-EX-A1H5-01	0.233319	0.130527	1.18436	0.0350333	0.213264	8.22188	1.60704	1.3391	1.74926	0.331872	1.00024	10.9242	3.04777	0.112606	0.794374	0.381897	2.06031	1.07402	0.634019	2.7677	0.122131	0.710584	2.23249	2.27221	0.694838	11.5543	2.80008	0.136967	0.979913	0.303131	0.743418	0.618104	5.00645	0.080188	0.808813	0.516375	0.990602	0.0676092	0.14972	0.131769	7.97617	5.63611	2.68575	0.454309	6.93608	1.0529	13.0155	3.85759	2.92484
TCGA-EX-A3L1-01	0.464273	0.144295	0.429609	0.00711342	0.240207	1.67104	0.526386	0.943361	1.47669	0.060144	0.340868	1.34183	1.24403	0.354777	0.109771	0.355519	0.911053	0.317729	0.516449	3.03873	0.0450044	0.170769	1.54905	0.222572	0.129711	1.21349	0.608652	0.0555186	0.468195	0.380801	0.590034	0.939063	2.77733	0.0260724	0.578553	0.0913348	0.575989	0.0348203	0.0466006	0.169946	3.42509	1.84086	0.0918261	0.118172	2.54944	0.226435	3.37963	0.58714	0.90072
TCGA-EX-A69L-01	0.323555	0.267891	3.97771	0.0089233	0.234363	4.02799	2.47618	0.646309	0.319762	0.160953	0.521459	3.69376	2.08074	0.109309	0.688498	0.348418	4.12697	0.587366	1.43452	2.18571	0.11291	1.28531	1.64676	0.717947	0.64831	4.78981	1.74517	0.0823069	0.955832	0.433105	1.03093	0.718287	3.96365	0.0850358	0.494833	0.587188	0.936625	0.0216193	0.159246	0.395916	7.95394	1.72959	0.55035	0.370596	1.79969	1.20097	6.81798	1.07249	2.30807
TCGA-EX-A69M-01	1.00033	0.180522	1.94513	0.0484521	0.317211	7.09157	0.391011	0.776213	0.120964	0.358663	0.800892	1.58546	1.68606	0.0389342	0.176567	0.041698	1.99463	0.58579	1.01532	2.13625	0.180171	0.0854573	0.558395	0.517126	0.524863	2.86617	0.957269	0.126286	0.505347	0.387478	0.31636	0.329526	4.00337	0.0619749	0.164502	0.428497	1.09425	0.0530231	0.160829	0.0911201	3.08096	2.05129	0.485051	0.172481	0.557862	0.467172	4.64228	0.360832	1.88773
TCGA-EX-A8YF-01	0.649152	0.290526	2.54727	0.0303617	0.294615	7.52588	0.108947	0.999678	0.186292	0.690456	0.980133	4.32011	1.51055	0.643084	0.290809	0.456213	2.14543	2.23726	4.37335	2.27108	0.202687	0.49765	0.556448	2.27436	0.311419	2.82684	2.46477	0.0334278	0.547219	0.269023	0.25122	0.718026	5.22512	0.763249	1.07988	1.64841	1.23394	0.110418	0.45764	0.482388	4.33073	3.04066	0.5406	0.247844	1.59222	0.673552	1.58062	1.09156	1.2441
TCGA-FU-A23K-01	0.334059	0.0632531	3.52598	0.0275602	0.132951	3.17293	0.737473	1.60858	0.253956	0.307589	0.94425	4.41897	0.568057	0.0744117	0.124985	0.221372	0.352979	0.649752	0.771788	1.24985	0.30489	1.36106	4.68214	0.91865	0.369509	2.32414	0.796963	0.130737	0.978631	0.141636	0.377895	0.444964	14.6369	0.150657	1.62439	0.341229	0.729702	0.0210246	0.294571	1.08844	10.4203	14.7686	0.0813191	0.421871	1.95083	0.688648	1.85609	0.451542	0.958723
TCGA-FU-A23L-01	1.70814	1.50131	1.50171	0.0681088	0.42236	6.68744	0.984373	1.37802	0.441841	0.303926	0.822561	9.20447	4.21856	0.297972	1.02599	0.487551	1.61538	1.78794	5.91615	1.71833	0.122089	0.735777	4.14783	1.87736	1.02363	4.79108	3.76023	0.144975	1.19395	0.583369	0.470783	0.85892	4.81741	0.170584	0.566536	0.892721	0.83972	0.099906	0.0641072	0.464909	6.403	2.54514	3.52497	0.314294	3.24849	0.805093	7.22977	1.93964	3.14498
TCGA-FU-A2QG-01	0.123925	0.281932	1.94943	0.0183543	0.21016	3.14324	0.592751	1.06629	2.63948	0.179802	0.446049	3.92487	1.7018	0.10965	0.376716	0.427031	3.89088	0.723107	1.0782	1.84172	0.194605	0.711078	3.11157	0.585606	0.551797	4.36437	1.46216	0.129331	0.624857	0.508221	0.23624	0.547165	2.93309	0.0354924	0.252701	0.146275	0.882605	0.0398529	0.12739	0.0777639	1.82469	0.769873	1.16016	0.0946278	2.24332	0.349918	12.5636	0.164969	2.27476
TCGA-FU-A3HY-01	0.252452	0.0564922	0.637101	0.0112523	0.166237	2.31485	0.614738	1.07506	0.743004	0.0838406	0.340288	10.8947	2.85955	0.127378	0.781379	0.118626	3.35516	0.252952	0.804177	1.92244	0.112124	0.364675	1.12135	0.792167	0.494119	2.67144	1.82587	0.0449088	0.963883	0.587309	0.506255	0.553647	3.43823	0.020879	0.748784	0.558721	0.626398	0.0192468	0.181586	0.0648067	1.75048	0.649885	1.10757	0.210295	3.50187	0.625645	2.7537	0.797392	1.4933
TCGA-FU-A3HZ-01	0.544485	0.403014	2.45826	0.0166848	0.223922	3.5967	1.22872	1.41403	8.5925	0.130218	0.526513	10.6827	1.43091	0.0707491	1.24774	0.378856	2.01363	0.651713	0.239608	2.32007	0.233855	0.831901	3.36807	1.29079	0.391637	4.21281	0.903634	0.0491744	1.29693	0.00824477	0.547496	2.26873	4.57528	0.173583	0.725957	0.482016	0.739011	0.0131361	0.187874	0.197117	0.80439	3.11028	0.0331356	0.33581	3.27411	1.14823	2.26269	0.234173	1.85015
TCGA-FU-A3NI-01	0.175477	0.222514	0.974253	0.0161316	0.299267	5.39944	0.994767	0.902355	0.292355	0.147001	0.873564	1.98637	1.80242	0.0611648	0.35562	0.29394	1.87475	0.303383	0.250968	1.82288	0.136079	0.154906	0.754176	0.865271	0.459614	3.50315	1.77465	0.0877507	1.17279	0.172714	0.493808	0.704087	3.27087	0.108398	0.298187	0.388361	1.34384	0.00518453	0.0850292	0.073409	2.68539	1.09859	2.85366	0.133993	2.98969	0.636622	2.85152	0.708573	2.57801
TCGA-FU-A3TQ-01	0.575009	0.14642	3.2711	0.0151898	0.324857	2.31225	0.872529	0.847918	0.290553	0.195727	0.766938	10.4727	2.07205	0.052632	0.867953	0.802818	4.16324	0.437078	1.20521	1.47338	0.214498	0.341317	1.65502	1.78432	0.72915	6.62646	3.4624	0.0853581	0.75512	1.17875	0.453579	0.7483	4.70325	0.0340727	0.545833	0.561697	0.748903	0.0309584	0.059294	0.22396	3.16611	1.28909	0.996101	0.121123	2.45911	0.43059	3.29045	0.403843	2.07724
TCGA-FU-A3TX-01	0.226195	0.377323	3.35978	0.0315062	0.145401	5.00496	0.577028	2.62073	0.273298	0.185404	0.808635	0.534881	3.14068	0.332465	0.400062	0.248005	3.36936	0.399958	1.16168	2.0781	0.265507	0.408432	0.251179	1.06466	0.402332	2.38525	1.19231	0.108642	3.43257	0.68409	0.5208	0.754746	4.13959	0.20786	0.44028	1.73848	1.26989	0.0300035	0.169105	0.25162	6.048	2.75103	1.03304	0.0863604	0.881015	0.459226	3.33882	1.03473	1.23364
TCGA-FU-A3WB-01	0.534367	0.74138	2.94987	0.0248896	0.188002	10.8448	1.1587	1.41319	0.830396	0.294065	0.585627	10.5483	4.03782	0.0876858	0.623775	0.340655	2.24401	0.498891	1.22281	1.94641	0.15664	0.905707	0.870305	1.66002	0.473635	5.4529	2.75254	0.138025	1.33135	0.475461	0.943001	0.61687	3.56912	0.13828	0.108966	1.30564	1.03715	0.00408061	0.355552	0.201193	11.7171	3.39693	0.94698	0.669183	1.42187	0.664996	5.28243	1.10971	2.24567
TCGA-FU-A3YQ-01	0.397437	0.209261	2.24367	0.01791	0.302394	3.65886	0.700764	0.950432	0.30275	0.33072	1.00224	2.43246	3.10087	0.124115	0.284274	0.543784	4.93172	0.348619	2.24023	1.40873	0.163168	0.278612	0.690128	0.489937	0.655816	2.72132	2.00181	0.082345	0.882025	0.326749	0.324704	0.442883	3.53891	0.0283584	0.2622	0.413928	1.02481	0.0543552	0.136912	0.418105	1.77033	0.716059	1.62763	0.223147	0.904992	0.493297	5.12874	0.448153	1.53513
TCGA-FU-A5XV-01	0.475164	0.262279	0.75375	0.0135899	0.191211	3.20317	0.606076	1.0249	0.280676	0.135421	0.347163	5.47033	1.01857	0.175817	0.346666	0.300184	3.85402	0.533984	0.906109	2.14847	0.19898	0.545297	1.03184	0.859106	0.268825	3.28904	1.75132	0.0557878	1.1613	0.330494	0.724651	0.867327	2.2987	0.0192125	0.322977	0.448691	0.593867	0.0099352	0.1342	0.089451	1.33844	0.42105	1.00246	0.229793	1.76198	0.570829	6.00384	0.543984	2.02334
TCGA-GH-A9DA-01	0.851444	0.501731	0.99047	0.0191334	0.234946	2.86987	0.633515	0.914269	1.209	0.183098	0.82334	1.27142	0.912587	0.184918	0.120787	0.134475	2.08851	0.515224	1.48158	2.65348	0.0594252	0.150326	0.837808	0.209922	0.124887	1.8878	0.956764	0.116627	1.37382	0.581038	0.695624	0.68047	3.54325	0.0803292	0.260433	0.515067	1.44755	0.0183834	0.0371318	0.053429	4.54751	0.902092	0.157176	0.0866874	1.37598	0.109281	3.58326	0.215355	1.50785
TCGA-HG-A2PA-01	0.148805	0.390069	1.18024	0.0188908	0.153978	5.18483	0.569405	1.62675	0.449149	0.270977	0.986695	3.48665	2.00787	0.107725	1.00809	0.65927	3.39974	0.441033	1.35293	2.25743	0.207712	0.703714	0.47605	1.04821	0.798437	3.06934	0.917273	0.0499165	1.04413	0.451937	0.34735	0.582035	1.54258	0.058018	0.997001	0.319921	0.937706	0.0721796	0.165547	0.120055	3.89602	1.54175	1.02589	0.316529	3.4194	0.644989	6.35754	1.214	2.17628
TCGA-HM-A3JJ-01	0.881325	0.577221	0.971809	0.0388633	0.203895	2.53405	0.712869	0.913194	1.20137	0.177104	0.741375	2.01911	1.03677	0.155616	0.169896	0.101849	2.10908	0.278731	1.85997	2.37564	0.120021	0.227709	1.46602	0.874456	0.408754	3.86219	1.91305	0.092538	0.810986	0.516236	0.333676	0.37858	4.27701	0.0456302	0.284915	0.485252	0.853381	0.0710822	0.0723167	0.242798	2.54778	1.45963	1.19893	0.123105	2.28626	0.337692	6.5891	1.01298	1.64246
TCGA-HM-A3JK-01	0.454406	0.727432	0.914889	0.0289201	0.229074	7.20222	1.51587	1.24401	0.44074	0.233652	0.845014	2.07099	1.61565	0.118089	1.16883	0.27101	3.15521	0.702531	0.899853	2.40849	0.0731874	0.462848	1.52996	1.42196	0.535586	8.53443	1.83821	0.0957577	0.646933	0.433488	0.542591	0.460415	5.67298	0.045933	0.784048	0.495103	0.896215	0.0622025	0.0653302	0.394815	6.67477	2.72702	0.788131	0.573853	1.85228	0.269177	3.65151	0.656091	1.57536
TCGA-HM-A4S6-01	0.355218	0.260144	0.973285	0.0217701	0.189354	4.07759	0.535464	1.46727	0.154068	0.12299	0.895165	2.51994	3.37463	0.116889	0.373029	0.598114	3.23179	3.87327	1.47792	2.71373	0.281726	0.555884	2.33385	0.99521	0.659736	3.54935	1.41519	0.139018	1.10339	0.464047	0.606805	0.573512	3.4268	0.026114	0.987742	0.514577	1.08615	0.0592273	0.166983	0.212771	5.82982	0.933096	0.268253	0.246583	1.94183	0.751013	2.24575	0.515856	1.52287
TCGA-IR-A3L7-01	0.579941	0.108146	1.59076	0.0414663	0.354228	7.99948	0.816775	1.64181	0.461149	0.400057	1.38642	7.73464	2.03958	0.303219	0.470121	0.239394	2.34719	0.266333	1.84895	1.61931	0.151785	1.66385	1.45123	1.93624	0.934184	5.93913	3.17693	0.0803835	1.29869	0.527998	0.434324	0.590086	7.14594	0.361506	0.369559	0.909153	0.926011	0.0319625	0.115919	0.159215	5.46294	3.87516	0.439697	0.516645	1.89805	0.640131	7.78211	0.231606	3.03639
TCGA-IR-A3LC-01	0.343589	0.158898	1.34442	0.0259708	0.20542	3.76528	0.525902	1.29532	0.140508	0.0943613	0.620197	10.8406	2.66991	0.011055	0.431715	0.16773	4.06787	0.504929	0.769865	1.5845	0.0799342	0.545957	4.40678	2.28721	0.682153	1.41211	2.53275	0.0761978	1.01909	0.207416	1.40355	0.267815	3.39586	0.0185233	0.280252	0.283891	0.322067	0.0306106	0.388159	0.150924	3.20512	1.81352	0.552715	0.183653	1.37739	0.370429	6.00953	0.0731819	0.752046
TCGA-IR-A3LH-01	0.480514	1.51074	1.4673	0.016197	0.111875	3.85168	0.98064	0.868585	0.835135	0.21102	1.26231	1.45821	2.31759	0.144943	0.219106	0.33116	1.81513	0.638649	1.39165	2.21378	0.217988	0.190882	1.22281	0.621967	0.666415	3.81004	1.94383	0.112832	0.709756	0.316874	0.961812	0.380468	3.67434	0.0850011	0.440928	0.808229	0.715365	0.0352193	0.0898089	0.135687	4.79881	1.30514	1.35905	0.339398	3.16935	0.41074	6.92717	0.786783	1.59913
TCGA-IR-A3LK-01	0.0502581	0.882845	1.27559	0.0192509	0.0693406	2.34308	0.560916	0.795357	0.702215	0.0722682	0.348294	2.68721	1.01001	0.0788314	0.351391	0.238128	1.28209	0.45618	0.431276	1.02531	0.201692	0.332747	2.17423	0.836395	0.543004	6.17626	2.18557	0.063924	0.849679	0.321533	0.513256	0.472322	2.21565	0.0508027	0.0768628	0.478288	1.4133	0.0700755	0.201957	0.141918	1.47542	2.43245	1.46122	0.268637	1.46385	0.12772	4.8752	0.0602133	0.967539
TCGA-IR-A3LL-01	0.50206	0.235396	2.01	0.037363	0.0948323	4.26401	0.640383	0.659168	0.1548	0.150519	0.400721	3.14392	0.81678	0.0923075	0.668623	0.360427	2.46301	1.10052	1.98318	1.51167	0.175203	0.759776	0.827422	0.795742	0.501582	5.85667	1.35399	0.112278	0.399935	0.207074	0.898489	0.357369	7.66701	0.02175	0.56064	1.3757	1.3512	0.0252659	0.104262	0.78762	5.37869	1.75466	2.98845	0.365114	2.05759	0.213566	3.53933	0.295981	1.7768
TCGA-JW-A5VG-01	0.522589	0.142929	2.44088	0.0204621	0.370519	4.13804	0.555473	1.11086	0.920134	0.166989	0.439833	2.45435	2.5672	0.742632	0.14121	0.900394	2.82009	3.12463	3.73705	2.52608	0.222892	0.538212	1.92093	0.501057	0.428884	3.81513	1.46808	0.159071	0.465003	0.411487	1.04366	1.04413	5.98052	0.0968461	0.236808	0.552588	0.880458	0.0475079	0.0759677	0.300602	3.82345	1.68619	0.792427	0.343622	3.26247	0.308535	3.41418	1.4841	1.53378
TCGA-JW-A5VH-01	0.695183	0.608113	2.23059	0.0329223	0.408724	3.93385	0.947171	1.92917	2.13217	0.191576	1.15095	6.87238	1.20656	0.0686277	0.384232	0.231387	3.84449	1.35215	0.949062	1.78454	0.26465	0.711317	1.06146	1.12966	0.563634	5.40837	1.68308	0.12985	2.12566	0.0373219	0.180715	2.00161	4.01894	0.555785	0.515485	2.27987	1.00185	0.0377035	0.147649	0.208203	2.84365	2.74832	0.0999976	0.253354	1.59136	0.666753	2.26356	0.176673	1.58449
TCGA-JW-A5VI-01	0.27343	1.67923	2.04822	0.0679613	0.24102	2.98717	0.891283	2.51723	0.476258	0.19836	1.30244	7.44162	3.60227	0.43255	0.443305	0.850609	6.40889	1.00456	1.21664	1.9292	0.201438	0.281605	1.20609	1.34828	0.916705	4.96577	1.80255	0.136734	0.800187	1.02865	0.546066	2.19423	3.17655	0.0307104	0.52659	0.793417	3.00696	0.0240286	0.215775	0.0857901	7.35189	0.860307	1.41811	0.208789	2.77459	0.332224	5.93042	1.41957	2.23071
TCGA-JW-A5VJ-01	0.45197	0.120103	2.62138	0.0424152	0.336148	3.70326	0.864739	0.870238	0.154025	0.0570865	1.64805	4.77606	1.07861	0.347649	0.32631	0.279853	3.2982	0.604376	3.59566	1.75559	0.157723	1.15955	0.776364	0.487517	0.468346	2.60072	1.35222	0.232158	0.794278	0.494899	0.507728	0.677273	11.4615	0.0228434	1.32485	0.550159	1.30057	0.0589357	0.0228784	0.398835	13.7025	0.546875	1.60907	0.183345	1.08287	0.513381	4.68779	0.270749	1.3743
TCGA-JW-A5VK-01	0.782771	0.0336853	2.45953	0.0313672	0.238842	4.48998	2.9377	1.11384	0.933649	0.351013	1.1354	3.15423	1.21007	0.210688	0.823685	0.220457	0.827104	0.800292	0.904231	2.00125	0.22063	3.06966	3.76945	1.44743	0.475502	3.8952	1.54268	0.0706949	0.525065	0.130383	0.811697	0.396561	7.04742	0.170424	0.675311	1.55917	1.96715	0.00102636	0.146301	0.17003	12.7041	3.19265	0.809829	0.264375	2.54584	0.881015	4.9962	0.649264	1.85111
TCGA-JW-A5VL-01	0.170596	0.547175	3.96904	0.0165542	0.132396	3.40962	0.29013	0.675942	0.164721	0.0596695	0.36659	3.57464	0.971376	0.0205835	0.29387	0.110223	1.45065	0.571457	2.8262	2.35096	0.158753	0.225896	0.839322	0.280402	0.373104	2.16797	1.22687	0.127965	0.475633	0.195895	0.511046	0.879476	3.15032	0.0143704	0.405851	0.40273	1.83427	0.0108561	0.123996	0.428204	3.40119	0.591527	0.573604	0.151977	0.769377	0.240852	2.69867	0.0908394	0.831664
TCGA-JW-A852-01	0.471292	0.0575252	1.83504	0.0288839	0.0738906	4.65893	1.06565	0.675024	0.0876051	0.146528	0.510977	7.0892	0.774925	0.165424	0.468875	0.221458	0.924828	0.333336	0.428938	2.25755	0.179417	0.737529	2.74758	1.00351	0.279428	2.38065	0.953261	0.0586868	0.243991	0.109642	0.63007	0.615075	5.51606	0.0303163	2.48996	0.682724	0.661476	0.0195722	0.0667314	0.604924	45.7506	8.74029	0.627079	0.71975	2.59246	0.310144	2.1228	0.598868	1.61128
TCGA-JW-AAVH-01	0.344679	0.04285	3.76658	0.026992	0.47555	9.2144	1.31892	1.22832	0.234923	0.550698	1.49369	10.709	3.07859	0.221801	1.76959	0.593864	1.84123	1.11735	2.87561	1.62471	0.280657	1.2678	1.09155	1.74681	0.728252	10.0342	4.00225	0.194846	0.667919	0.972519	0.531912	0.765182	6.42478	0.0890391	2.77236	1.00016	0.876352	0.0490904	0.257685	0.865158	8.86831	3.23131	1.2271	0.321682	6.18911	0.766802	3.70357	1.00944	5.50963
TCGA-JX-A3PZ-01	0.111139	0.484966	0.771311	0.0195826	0.0718772	1.84244	0.779676	0.981037	1.25933	0.101502	0.268677	4.49697	0.72589	0.134097	0.253388	0.203455	2.09913	0.558435	0.933844	2.37997	0.0872639	0.478288	2.29089	0.342515	0.681172	2.14111	1.33005	0.152234	0.583466	0.125797	0.476701	0.419437	4.5094	0.106726	0.113315	0.295165	0.543869	0.0151553	0.105592	0.470752	1.93628	1.24441	0.164863	0.159122	1.14865	0.226804	4.01381	0.23302	0.580509
TCGA-JX-A3Q0-01	0.140671	0.195167	1.13804	0.0129319	0.14071	3.90277	0.179428	1.06857	0.546501	0.104965	1.27866	1.30101	1.9789	0.0543132	0.119735	0.0484739	3.97501	0.255368	2.69593	1.95377	0.137451	0.18627	3.00702	0.450869	0.22107	4.11927	1.70718	0.0715688	0.390531	0.492903	0.298811	0.353927	2.37086	0.0255952	0.258165	0.423409	0.752377	0.0153459	0.240131	0.0794454	4.21458	1.34948	0.289355	0.0751908	0.507533	0.285988	5.15593	0.438193	0.688577
TCGA-JX-A5QV-01	0.130907	0.0952042	1.42765	0.0260743	0.214476	5.22166	1.2523	1.7402	0.178445	0.147537	0.896654	2.31736	1.24962	0.157948	0.159177	0.4229	2.85782	1.01847	2.41051	2.60874	0.125626	0.7367	3.16475	1.25066	0.308588	2.56176	1.56662	0.0832516	1.36284	0.431633	1.22993	0.285769	2.80895	0.0264652	1.00102	0.796731	0.884216	0.0774284	0.22224	0.646897	18.9278	1.52249	3.10698	0.337364	3.2594	0.337712	2.83273	1.17628	1.35776
TCGA-LP-A4AU-01	1.08621	0.280461	1.19288	0.0204831	0.509152	4.23859	0.621688	0.901118	0.360674	0.220811	0.807969	2.19351	1.84707	0.248675	0.355596	0.347905	3.60715	2.20299	2.01159	2.65662	0.252702	0.221279	1.41753	0.652343	0.315143	3.10642	0.845012	0.10355	1.14991	0.158995	0.341319	0.482275	5.30258	0.0816449	0.880301	0.850638	0.967496	0.0807061	0.0954345	0.288373	4.73771	4.02387	0.253397	0.170138	1.30842	0.544781	4.48898	0.400422	0.698285
TCGA-LP-A4AV-01	0.276401	0.206171	2.11919	0.0112931	0.103282	1.79071	1.20455	0.738749	0.596558	0.221998	0.326673	7.02319	0.370312	0.0778156	0.336091	0.21827	0.677985	1.19468	0.79062	1.1452	0.19291	1.21999	3.37623	1.4765	0.325781	2.22337	0.6833	0.054086	0.590264	0.0272048	0.30109	0.259078	5.78711	0.023283	0.845435	0.387424	0.698521	0.00942272	0.209509	0.476972	10.7937	21.1379	0.291562	0.386939	3.13368	0.120616	1.34747	1.14063	0.494987
TCGA-LP-A4AW-01	0.701849	0.583349	1.74953	0.0276518	0.276667	3.77859	0.788643	1.06252	1.1959	0.181841	1.31428	8.30705	2.28362	0.1613	0.426708	0.143958	2.19705	0.69339	1.19499	2.32093	0.209933	0.221275	8.57308	1.1948	0.535734	3.17189	2.11813	0.104638	0.915948	0.460531	0.737237	0.573775	4.06815	0.0608104	0.749664	0.946782	0.912196	0.0551451	0.106191	0.377501	8.4177	3.042	2.40613	0.255203	2.98944	0.478713	6.07499	1.37476	1.54618
TCGA-LP-A4AX-01	3.46368	1.67782	4.07234	0.036212	0.30219	6.03577	1.03952	1.96042	1.23592	0.367407	1.30034	3.38595	2.53864	1.003	0.396393	0.579223	1.63924	0.819	4.98292	1.70669	0.327063	0.755414	1.53473	0.703265	0.778072	4.08219	2.44517	0.103659	0.754185	0.21658	0.0998755	0.57293	8.13967	0.0617862	0.457016	0.937924	1.40429	0.0475097	0.0863159	0.115067	4.09191	2.3549	2.88533	0.326716	2.81789	0.401668	4.22038	0.423115	1.7514
TCGA-LP-A5U3-01	0.0616311	0.0896442	0.733238	0.0084986	0.0797173	2.42704	0.373402	0.615548	0.430561	0.122155	0.119194	2.33788	1.42435	0.223085	0.0562054	0.172554	2.96303	0.239747	0.286472	2.2732	0.172058	0.816089	1.00376	0.265913	0.530284	3.96193	1.1427	0.0482397	0.866467	0.145585	0.226585	0.332929	1.92357	0.0311495	0.282769	0.518321	0.934525	0.0111356	0.11327	0.0580112	2.92531	0.997266	0.207225	0.22354	1.70245	0.28002	4.43323	0.381502	1.23247
TCGA-MA-AA3W-01	0.270273	0.55296	1.77618	0.0532417	0.346258	4.15926	0.566352	1.17317	0.486841	0.246087	0.808948	5.52375	0.775933	0.23293	0.140845	0.232833	5.56881	0.600785	0.966365	1.79448	0.148211	0.66464	1.92581	1.52309	0.579472	3.68002	1.40572	0.12844	0.797055	0.402825	0.2839	0.600002	4.39851	0.132698	0.472395	0.854516	1.95862	0.0502811	0.223707	0.327084	8.0509	2.19783	1.03857	1.14982	1.95896	0.630345	4.44831	0.832653	2.25873
TCGA-MA-AA3X-01	0.353512	0.482551	1.20566	0.011916	0.182902	1.18556	1.80363	0.790688	1.33724	0.0906751	1.19645	5.79821	1.13669	0.281513	0.623289	0.548175	5.44559	0.160437	1.11231	2.0442	0.197383	0.421294	1.22347	2.17895	0.344445	5.19027	1.33473	0.0622575	0.32714	0.368822	0.288817	0.56505	4.16513	0.0464546	0.612735	0.312953	0.516546	0.0513394	0.151966	0.0332749	2.25019	1.64458	0.209758	0.188957	2.01946	0.408351	3.15485	0.155297	1.1501
TCGA-MA-AA3Y-01	0.544655	0.591115	0.561589	0.0158555	0.0939319	2.21404	0.538403	1.07647	1.522	0.0889018	0.280895	2.9712	1.20402	0.0394297	0.281467	0.328445	2.72541	0.40609	0.194742	2.74476	0.104537	0.0360603	1.55236	0.335709	0.273902	2.2532	0.587546	0.0639467	0.756034	0.214431	1.20144	0.652928	2.59238	0.0220223	0.222127	0.204921	0.427952	0.010955	0.0695613	0.128166	1.18052	1.28263	0.366263	0.135166	2.40518	0.281018	3.71459	0.271892	0.812821
TCGA-MA-AA3Z-01	0.319874	0.608425	0.665981	0.0208292	0.255142	2.25521	0.586504	1.30491	1.11734	0.102559	2.97717	5.37361	1.76779	0.192974	0.729285	0.18945	2.70694	0.596238	1.05794	1.45857	0.195345	0.423562	3.37815	0.542193	0.713197	3.69744	2.58798	0.0469446	0.583483	0.220386	0.52267	0.769292	1.80952	0.0606263	1.18224	0.884921	1.04723	0.0736071	0.176864	0.0752716	10.8166	0.450585	0.253065	0.290051	2.47948	0.628141	5.11976	1.53294	0.85926
TCGA-MA-AA41-01	0.420792	0.141243	2.69781	0.0311616	0.247949	5.57706	1.07345	0.749779	0.346549	0.190789	0.565143	3.2431	0.775173	0.118466	0.277151	0.151042	2.71803	0.954857	1.47947	1.30758	0.19579	0.464327	2.60568	0.605182	0.873454	2.4462	1.22939	0.144096	1.32296	1.46338	0.572974	0.316574	7.98944	0.0567136	0.679296	1.36589	1.43079	0.0511643	0.0218463	0.396077	10.7946	1.6921	0.970973	0.763119	0.593043	0.50227	2.82588	0.238068	1.25595
TCGA-MA-AA42-01	0.112141	0.460063	0.889447	0.0137455	0.0709136	3.17202	2.00253	0.79401	0.152865	0.156895	0.927765	2.21474	1.65267	0.0360816	0.613615	0.0161012	1.02694	0.0969411	0.614811	2.38375	0.0391337	0.544472	0.875154	2.30402	0.657942	2.28928	2.11702	0.0146292	0.439051	0.40471	0.79403	0.376195	1.80836	0.0566783	0.876582	0.215097	0.752309	0.00892031	0.17932	0.28148	3.93824	2.58147	0.280945	0.185532	1.06769	0.495121	3.77107	0.552348	1.04876
TCGA-MA-AA43-01	1.25328	0.336541	0.86978	0.0105613	0.183721	5.65982	0.639428	1.48532	0.832843	0.199697	0.949331	1.1093	2.64458	0.120973	0.476228	0.337396	2.76676	0.467217	0.716979	2.87853	0.251478	0.580836	0.861119	0.386242	0.142794	4.02832	1.56322	0.214586	1.26015	0.191199	0.12799	0.769759	11.0014	0.0886802	0.638906	0.249635	0.501008	0.0572519	0.0702721	0.3539	4.19502	3.26827	0.18591	0.167474	4.46288	0.44396	3.22634	0.625638	0.972578
TCGA-MU-A51Y-01	0.392135	0.371248	0.909138	0.0092433	0.145661	8.17714	0.403985	1.01413	0.236429	0.271969	0.631986	3.77053	1.93982	0.131022	0.898618	0.506722	2.87081	0.391134	1.44523	4.27098	0.0947369	0.239652	0.552683	0.743694	0.34131	3.71915	1.01686	0.0295126	0.762265	0.623473	0.36966	0.674106	3.69521	0.0823259	0.707358	0.507366	0.415806	0.0252967	0.199201	0.141963	2.36693	0.819301	0.226709	0.253365	1.26969	0.831598	11.218	0.481857	1.30546
TCGA-MU-A5YI-01	0.520118	0.698333	1.13446	0.0249033	0.269101	6.81367	1.67927	1.27125	0.520668	0.379004	0.513429	6.01293	1.56788	0.156889	0.31622	0.336052	1.78612	0.590124	0.883353	1.99394	0.11344	0.258268	0.430167	1.28234	0.850591	7.35688	1.35886	0.0699713	0.601646	0.300757	0.371817	0.577328	6.06216	0.0657193	0.662875	0.489222	0.743856	0.0651623	0.0668326	0.397775	4.19186	4.73409	0.501499	0.608148	1.46606	0.565755	3.91983	1.10349	2.55177
TCGA-MU-A8JM-01	0.113922	0.675561	1.40054	0.023564	0.250502	2.27208	0.74471	1.06971	0.630875	0.188165	0.596712	2.98388	1.37366	0.0824728	0.121209	0.343495	4.55489	0.240047	2.38289	1.88547	0.159021	0.226276	0.840735	0.245765	0.252885	1.13202	1.61298	0.150473	0.922458	0.420482	0.907471	0.421511	2.20005	0.0115157	0.174229	0.0882456	0.565341	0.0499056	0.106462	0.134039	6.15747	0.781802	0.675964	0.0434951	0.374632	0.434263	1.09659	0.181985	0.790562
TCGA-MY-A5BD-01	0.215278	0.120434	3.10191	0.0252879	0.0804423	5.09572	2.3569	1.52426	0.366818	0.370912	0.393215	2.74801	1.73053	0.129874	0.174512	0.0463642	3.09794	0.255885	0.641443	1.53183	0.125208	1.90041	1.24177	2.87498	0.36933	4.26377	1.86269	0.0561674	0.855617	0.621539	0.381076	0.217717	5.12328	0.569416	0.0731642	0.365277	1.12767	0.114489	1.20261	0.742991	19.1566	1.93872	2.24248	0.287673	2.3598	0.928381	3.98378	1.4329	2.63444
TCGA-MY-A5BE-01	0.59091	0.743795	1.72825	0.0543223	0.165602	7.4408	3.13262	0.987095	0.30206	0.312895	0.642832	2.96202	3.48834	0.0891214	0.651158	0.286343	2.64524	0.670444	0.422562	1.87613	0.0773281	0.195614	1.12781	0.865022	0.45271	6.06644	0.996006	0.115629	1.06474	0.494364	0.814674	0.83628	12.3625	0.0634645	0.903717	0.768325	1.87347	0.0168711	0.115044	0.347627	14.2467	3.44689	0.67202	0.394812	2.082	0.676887	6.45955	0.855451	2.70067
TCGA-MY-A5BF-01	0.0659672	0.0885703	1.12492	0.00909652	0.0967027	3.98887	0.147248	0.733092	0.0899225	0.11793	0.414634	4.59959	1.06057	0.0159187	0.280746	0.113658	9.57922	0.23523	0.589667	2.21923	0.0920815	0.0873506	0.604341	0.813205	0.510574	3.90623	1.00072	0.0516337	0.763074	0.266206	0.754527	0.463746	2.59936	0.0300069	0.336293	0.189796	0.381923	0.00967015	0.1048	0.217324	1.59271	0.867287	0.378372	0.314825	0.83054	0.254001	3.82958	0.210758	0.807263
TCGA-MY-A913-01	0.871229	1.47162	1.51577	0.0344481	0.0678564	6.49052	1.27257	1.56556	1.48451	0.194415	0.452942	1.92912	2.14622	0.684971	0.375907	0.145266	2.399	0.437305	2.45188	3.00725	0.294223	0.558213	1.45899	0.311807	0.342292	1.90355	1.38323	0.219976	0.430125	0.28768	0.275531	0.395142	3.28934	0.105112	0.286543	0.559794	0.751573	0.0383237	0.0507763	0.290988	4.85778	0.68214	0.244577	0.0965705	1.49985	0.199112	6.46738	0.280593	1.25825
TCGA-PN-A8MA-01	0.540665	2.78269	5.11529	0.0710046	0.339674	6.63272	2.16739	2.11869	2.22417	0.447256	1.2946	1.56261	0.931324	0.0838731	0.586985	0.232885	1.21252	0.701069	1.62937	1.5966	0.0673836	2.35232	1.49381	2.42796	0.919469	15.4125	8.72258	0.181366	3.86244	0.10643	0.315514	0.457245	20.5811	0.265454	0.511874	1.77778	2.29976	0.378639	0.563	0.545259	13.3505	6.53915	3.6358	0.442336	3.12051	1.97472	2.40907	1.94328	2.7664
TCGA-Q1-A5R2-01	0.430898	0.468344	1.78206	0.0216925	0.0318486	6.47474	0.745906	1.169	0.199288	0.133969	0.367072	3.91402	0.49483	0.0297089	0.523952	0.092802	1.35894	1.03766	0.396176	2.16234	0.150369	0.407554	4.44884	1.29002	0.515135	1.98482	1.4941	0.0481817	0.43819	0.139351	0.352041	0.346194	4.17872	0.0653351	0.439334	0.776546	1.08614	0.0228739	0.103546	0.43456	4.7458	2.02771	1.0714	0.270275	2.77617	0.450338	6.15496	0.614586	1.00133
TCGA-Q1-A5R3-01	1.17505	0.372092	2.00465	0.0366867	0.00382359	2.32635	1.35739	1.00112	0.256885	0.289507	0.19295	11.7261	0.222776	0.0160502	0.310023	0.267393	1.67498	0.833701	2.48913	1.72535	0.324947	1.08622	9.52365	0.3553	0.254347	0.998113	1.0912	0.0954437	0.410335	0.261859	0.652079	0.311718	5.22437	0.0537863	0.723351	0.942098	0.892403	0.0734654	0.138125	0.479976	6.81277	3.25437	3.14845	0.177758	4.05785	0.184392	1.8727	1.77968	0.390422
TCGA-Q1-A6DT-01	0.912388	0.539005	2.17098	0.0279586	0.396526	4.65466	0.418954	1.22699	0.970097	0.087937	0.599946	25.4203	4.10721	0.0792615	1.68632	0.8646	1.3249	0.402246	0.626354	1.58771	0.203772	0.676559	2.9348	0.0899791	0.430155	6.40922	1.50096	0.121404	0.870302	0.560365	0.954132	0.696768	5.83769	0.0627147	0.893039	0.533088	1.60986	0.0564849	0.0932215	0.412224	7.54983	2.10908	5.5725	0.195074	11.8506	0.786929	7.42895	1.51579	1.59036
TCGA-Q1-A6DW-01	0.179167	0.180418	1.30264	0.0484973	0.169947	2.10151	0.41897	0.840118	0.295111	0.109087	0.750764	4.05628	2.3404	0.100882	0.181549	0.321558	7.61764	1.12289	1.85778	1.52501	0.135467	0.158163	1.09426	1.84055	0.781349	2.87033	2.41595	0.116864	1.5411	0.458498	0.121982	0.406587	1.70089	0.0362217	0.121783	0.330439	1.12786	0.122973	0.130226	0.0843218	3.39182	0.819698	0.614233	0.0342026	1.21204	0.620881	2.09449	0.143105	0.552588
TCGA-Q1-A73O-01	0.364089	0.442285	0.680687	0.0342676	0.174919	2.33899	0.663428	1.18164	0.327916	0.133412	0.704143	0.845583	1.25433	0.138065	0.12649	0.145625	4.3378	0.708161	1.82253	2.05195	0.0907536	0.172182	0.714751	0.480887	0.408699	1.84584	0.859164	0.117045	1.10149	0.40443	0.254964	0.373345	1.62337	0.0394323	0.318186	0.322317	1.32642	0.0429103	0.116655	0.122394	3.76738	0.75897	0.123448	0.148937	0.625529	0.388525	2.872	0.290806	0.388108
TCGA-Q1-A73Q-01	0.530802	0.704758	1.51561	0.0195186	0.122057	4.04575	0.744748	0.686948	1.0974	0.214539	0.638751	5.77848	1.70676	0.333032	0.451801	0.243879	1.00688	0.527682	0.708546	1.63509	0.284023	0.421718	0.46827	0.916078	1.00379	4.21955	2.14726	0.0969425	0.995002	0.341329	0.260197	0.528958	2.98203	0.211044	0.649431	0.830161	0.848768	0.0887884	0.180779	0.0666167	6.52434	2.60738	0.503926	0.24319	0.930951	0.523215	2.49262	0.282642	0.771023
TCGA-R2-A69V-01	0.391191	1.10882	2.03401	0.0173151	0.224885	2.44053	0.498968	0.617549	0.725811	0.145273	0.322238	3.26621	0.960857	0.0629329	0.634227	0.149778	1.66323	0.817236	0.683814	1.97315	0.121345	0.230221	3.80502	0.428656	0.580617	2.6267	1.26013	0.0425267	0.525994	0.111231	0.816757	0.501765	8.00398	0.166959	0.620432	0.846534	1.12643	0.0234121	0.102902	0.204564	2.00347	3.15242	0.773717	0.19914	1.73157	0.381583	7.43369	0.399246	1.29733
TCGA-RA-A741-01	0.410145	1.20231	1.43134	0.0175954	0.120248	5.25185	2.27567	0.871199	0.279542	0.204027	0.330506	2.40041	0.989095	0.118768	0.448845	0.0353329	1.48895	0.425461	0.879887	2.8039	0.0858762	0.597403	0.876734	1.46625	0.58977	3.60972	2.35048	0.136437	0.700703	0.226064	0.46912	0.497748	5.50444	0.116085	0.501808	0.871412	1.32297	0.0369129	0.189087	0.694899	2.83572	2.50059	0.730083	0.219228	1.21773	0.650642	6.95326	0.835358	1.3221
TCGA-UC-A7PD-01	0.825547	1.30683	1.77033	0.0215497	0.152921	3.64331	0.643496	1.07528	0.541829	0.0950623	0.601188	3.1813	2.82654	0.13281	0.408967	0.474126	1.67999	0.971354	3.6077	2.22247	0.160049	0.607306	2.05416	0.565381	0.278696	2.02136	1.54611	0.131627	0.544131	0.300943	0.549566	0.877888	5.6781	0.04327	0.748185	0.730832	1.04527	0.0473229	0.0876251	0.489259	5.72122	1.65213	0.278182	0.361886	1.79263	0.376735	3.86031	0.280848	1.79783
TCGA-UC-A7PF-01	0.44589	0.432374	2.29877	0.0614859	0.237105	4.72966	0.663527	1.02971	0.27858	0.21661	1.31747	2.44316	0.896082	0.0537995	0.0903637	0.176057	2.22391	1.10817	1.88657	1.99804	0.0778005	0.295214	0.491702	0.916113	0.621901	2.68253	1.85387	0.138148	0.568684	1.0094	0.151787	0.46194	3.30521	0.0488282	0.416734	0.41118	1.56735	0.0339484	0.0856527	0.489651	5.03617	1.26693	0.661428	0.212799	0.544627	0.55512	2.71717	0.296785	1.0425
TCGA-UC-A7PG-01	0.215525	0.268703	0.879135	0.0330219	0.233638	2.65182	0.903256	0.822918	0.283298	0.12923	1.41918	2.78082	1.48501	0.133737	0.243349	0.331552	2.9605	1.13783	1.60728	1.19803	0.0429777	0.203848	1.41034	0.721148	0.636281	2.42258	2.49104	0.108447	0.646557	0.327287	0.176082	0.865788	2.90691	0.0186737	0.15696	0.327081	1.09501	0.0474433	0.115091	0.144904	1.92602	0.978623	0.51153	0.105797	0.937285	0.5975	3.42777	0.233624	0.827075
TCGA-VS-A8EB-01	0.268472	0.106804	0.828092	0.038392	0.149192	3.66057	0.570731	0.868622	3.94429	0.11593	0.403839	4.82801	1.91834	0.187159	0.253905	0.089943	1.49268	1.39249	0.767941	3.02268	0.156147	0.276498	4.22069	0.514822	0.625839	3.15773	1.24695	0.0992318	0.73259	0.358198	0.389938	0.401751	1.76896	0.120614	0.212899	0.924272	1.04445	0.0335589	0.17841	0.168469	5.13976	2.23244	1.94699	0.250559	2.1413	0.647804	6.36599	0.619478	0.99719
TCGA-VS-A8EC-01	0.537701	0.488813	1.67925	0.0360432	0.782432	9.24686	1.09306	2.20298	0.618437	0.263823	0.823259	18.0415	1.21566	0.129754	0.633387	0.303985	1.8465	0.413978	1.29773	1.12602	0.14073	1.0235	1.81304	1.0357	0.876705	3.78916	1.20087	0.118369	1.93772	0.0330771	0.906052	0.681397	5.29687	0.370278	0.582491	1.24953	1.52874	0.0630116	0.048155	0.664281	22.4976	2.89375	1.0369	0.384923	1.64192	0.600408	6.52988	0.322105	1.73528
TCGA-VS-A8EG-01	0.09194	0.082295	1.34906	0.0197214	0.170453	4.8411	0.659646	2.01759	0.321151	0.192947	1.32617	6.85896	1.33956	0.105385	0.251538	0.326716	2.819	0.28314	1.24918	2.26074	0.208546	0.273921	1.80155	1.33172	0.386503	3.39331	2.15407	0.107945	0.965344	0.588199	0.807479	0.48305	2.17009	0.0557618	0.234349	0.590089	0.994884	0.0382385	0.133174	0.194715	8.60172	1.03608	0.409147	0.166736	0.829284	0.389408	3.72518	0.312097	0.891849
TCGA-VS-A8EH-01	0.787809	0.420386	2.18697	0.0194985	0.323989	5.78909	0.347835	0.673454	0.40271	0.237869	2.18775	9.4798	4.81054	0.292474	1.71324	0.574265	1.8135	3.02532	5.82865	2.54632	0.475822	1.00306	5.6443	1.08322	0.797603	5.41955	2.18591	0.177875	1.01375	0.435418	0.990207	1.60542	4.63395	0.0153143	1.51378	1.52896	0.676645	0.032435	0.0660705	0.256686	19.4365	4.91172	2.68484	0.370193	4.2476	0.322006	12.3357	1.16167	1.74545
TCGA-VS-A8EI-01	0.673101	0.103057	0.955343	0.0379953	0.1894	4.56331	0.47446	1.63956	2.66809	0.195504	0.605208	2.58531	0.783139	0.205172	0.624614	0.671417	1.66843	1.26326	0.836006	3.06324	0.23489	0.609829	2.19972	0.873431	0.403635	3.8938	2.078	0.117848	0.416099	0.362632	0.0289431	0.92278	8.59676	0.0501344	0.686278	1.61514	0.957153	0.00845399	0.0728338	0.967023	13.5104	4.41192	2.39633	0.202885	4.26054	0.3492	15.554	1.3299	1.38516
TCGA-VS-A8EJ-01	0.181485	0.259915	3.48346	0.0400414	0.156496	5.04434	2.12968	0.408475	2.07808	0.330086	0.538185	2.46526	1.67772	0.131384	3.53084	0.203249	0.569813	0.705986	1.79097	2.15774	0.278663	1.77833	2.66021	0.805409	0.573274	9.37753	3.74424	0.113641	0.788056	0.628768	0.26689	0.349176	26.5941	0.106402	1.66534	1.4299	0.540373	0.0732538	0.284928	1.02496	21.6898	8.44289	1.39273	0.748336	10.7222	0.525494	1.41921	2.37728	3.23926
TCGA-VS-A8EK-01	0.192626	0.380757	1.93522	0.0452539	0.160566	5.95431	0.880412	1.24194	0.350102	0.259518	1.159	2.76041	3.41947	0.371865	0.644116	0.193599	3.65394	0.312218	1.9055	2.82804	0.358507	0.340088	2.67972	1.38517	1.07717	3.97137	1.81821	0.1759	1.00555	0.530859	0.393435	0.91227	7.91586	0.0746401	1.30931	0.838418	1.24799	0.0464052	0.122007	0.392843	5.69013	2.23565	1.24455	0.232889	2.70271	0.306565	5.30856	0.717988	1.41817
TCGA-VS-A8EL-01	1.08353	1.53774	1.87711	0.0235916	0.196702	4.70162	1.07291	0.569574	0.194343	0.135194	1.26835	2.20448	1.9483	0.220185	0.294709	0.429871	1.37086	1.14618	2.42646	1.99555	0.169158	0.264298	1.04489	0.667857	0.302473	2.11634	1.86479	0.0948532	0.253719	0.886852	0.442619	0.582366	4.73898	0.0317053	1.16289	0.820383	0.966922	0.0361608	0.174091	1.07357	7.71367	1.11228	0.0563963	0.0653192	2.05753	0.390855	5.58297	0.819891	0.95319
TCGA-VS-A8Q8-01	0.437344	0.375154	2.2258	0.0234529	0.182277	5.87052	0.976215	0.902316	0.161461	0.189796	0.281939	3.89734	1.75781	0.1671	0.177263	0.329666	2.78919	1.18145	4.09176	1.42796	0.165337	0.482592	0.482278	0.494205	0.526932	3.54757	1.86748	0.0855793	0.466982	0.20088	0.714615	0.345208	4.46467	0.0442083	0.668859	1.03245	0.733489	0.0427403	0.047682	0.343047	3.03978	1.17946	0.245084	0.459185	1.16426	0.297499	3.76376	0.174658	1.07691
TCGA-VS-A8Q9-01	0.628714	0.318403	3.51688	0.0831473	0.348114	5.4814	2.00483	1.11716	0.191703	0.149175	0.991938	7.12491	0.930994	0.582911	0.181063	0.114025	3.50642	3.15369	5.72642	1.88663	0.369516	0.219082	0.202098	0.4895	0.717634	2.17416	1.60632	0.142452	0.730208	0.677437	0.24331	0.817852	6.06757	0.127105	0.269904	1.56721	3.75859	0.00225614	0.156677	0.404906	12.456	1.8836	0.130895	0.467447	0.808352	0.642152	3.12097	0.436093	0.938267
TCGA-VS-A8QA-01	0.0982991	0.087987	2.33897	0.0612482	0.231688	10.7723	4.45104	1.89441	1.90944	0.445694	0.823807	3.40922	3.29244	0.205581	1.19527	0.451639	1.02877	0.212438	2.17911	1.39891	0.102909	1.77889	0.600361	1.41374	0.844494	7.37562	4.17533	0.0769405	2.83394	0.922361	0.776328	0.703162	6.39169	0.218601	2.83966	0.580141	0.867218	0.400121	0.830836	0.431786	30.5836	5.63338	2.96816	1.05085	3.85443	1.40295	7.67717	2.56478	3.60876
TCGA-VS-A8QC-01	0.289217	0.692496	1.21578	0.0248152	0.219467	3.54908	2.5823	1.26122	1.22216	0.152863	0.568665	10.5113	1.85992	0.125625	0.439593	0.236696	3.71737	0.825049	0.579096	1.68804	0.292689	0.382968	1.50143	3.20877	0.995389	4.93837	1.85246	0.141485	0.936744	0.660417	0.330804	0.599254	6.65723	0.0760113	1.88723	0.780907	1.14819	0.00591579	0.183788	0.353899	5.01496	3.08371	1.18982	0.154591	2.57609	1.74168	2.65012	0.669912	1.0963
TCGA-VS-A8QF-01	0.19617	0.343865	1.11507	0.0190357	0.293208	3.63	0.583838	0.800264	0.646233	0.076238	1.22248	5.33891	2.75962	0.118346	0.596333	0.309824	1.28316	1.35664	0.631267	2.61503	0.171142	0.476224	9.55155	0.322435	0.824669	4.03117	2.07209	0.166341	0.384017	0.19308	1.54927	0.648402	3.85217	0.00330492	0.500024	1.27353	0.784202	0.0294253	0.179249	0.153873	3.06784	2.40904	3.58247	0.174759	2.00288	0.48845	5.57211	0.835653	0.98561
TCGA-VS-A8QM-01	0.442606	0.693304	1.17853	0.0290633	0.234449	3.89561	0.544386	1.24079	0.646429	0.275218	1.96675	3.28939	1.20715	0.114435	0.480525	0.313205	3.69127	0.676403	2.21556	2.34923	0.17652	0.376764	0.90107	0.896373	0.414858	4.62885	2.62177	0.0804225	1.21526	0.479199	0.284119	0.93111	5.37765	0.0287615	0.709139	0.33585	1.08078	0.0344886	0.0827238	0.26782	3.88591	1.95491	0.375174	0.168985	1.24757	0.521003	6.44485	0.366145	1.42485
TCGA-VS-A94W-01	0.801236	0.511324	2.98919	0.0600172	0.225186	8.12002	0.757025	0.997696	0.51576	0.249109	1.29132	2.01553	1.66984	0.0429663	0.0541258	0.102258	2.70782	2.77052	2.65262	2.02872	0.196759	0.117884	1.57077	0.987717	0.331115	2.73212	1.44055	0.121944	0.866096	1.19753	0.290935	0.474328	4.23736	0.0539945	0.635383	1.40548	2.79802	0.0540225	0.0776494	0.335189	14.3459	1.61205	0.727798	0.147289	0.446112	0.617019	3.3569	0.474048	0.744011
TCGA-VS-A94X-01	0.669865	0.104929	1.1423	0.0164215	0.225275	3.02086	0.576733	0.796247	1.57513	0.184836	2.35351	4.54966	4.84629	0.234388	0.203631	0.302963	4.37068	0.933746	2.37116	2.09966	0.0818163	0.354801	3.68208	0.412885	0.468459	1.69803	2.30334	0.0589854	0.95368	0.283506	0.465184	0.401514	2.37819	0.152353	0.30734	0.593011	1.01573	0.00456724	0.181539	0.0945781	2.16868	0.812943	0.529956	0.153451	0.956662	0.675766	5.58821	0.936313	1.06966
TCGA-VS-A94Y-01	0.857077	0.43153	0.883724	0.0656591	0.34736	4.67081	0.655926	1.64572	1.22673	0.0532942	0.455833	5.23287	2.41139	0.155118	0.208433	0.406092	4.07851	1.38919	0.858057	1.72536	0.0897275	0.22698	1.57038	1.05655	0.151529	1.51212	1.35796	0.0586993	0.671116	0.32056	1.01533	0.558125	2.47439	0.0606455	0.262156	1.25193	3.9697	0.0590212	0.138831	0.0403368	2.63369	2.0679	0.627212	0.22906	1.61056	0.422413	4.37441	0.564767	0.882556
TCGA-VS-A94Z-01	0.467942	0.553484	1.13995	0.030727	0.167168	3.16751	0.405015	1.00619	0.364498	0.197446	0.63565	1.15923	1.14191	0.145183	0.101606	0.20156	1.93489	0.693453	2.17507	2.30308	0.268273	0.398331	0.918627	0.494444	0.514771	3.18573	1.23944	0.130809	0.963617	0.572426	0.191153	0.41553	4.45972	0.0844665	0.238551	0.917278	1.69555	0.0387418	0.137436	0.25169	2.34763	2.07647	0.846188	0.127613	1.03007	0.51994	3.79097	0.240271	0.867934
TCGA-VS-A950-01	0.320665	0.143513	2.16184	0.013511	0.193558	2.88199	1.32929	0.56949	4.99946	0.112159	0.775201	7.29836	3.46377	0.290177	0.316804	0.397101	4.09011	1.29937	2.26442	2.04704	0.125889	1.3269	4.81454	1.33413	0.667715	2.06463	3.13487	0.0705909	0.784656	0.244601	0.785943	1.31103	4.44117	0.174225	1.34864	0.532265	0.939309	0.00628573	0.0774132	0.603661	8.44595	1.37826	0.935483	0.122428	3.70582	1.14209	5.47936	0.416198	0.873348
TCGA-VS-A953-01	0.587754	0.887786	0.776959	0.0397736	0.126706	1.96615	0.281132	0.378949	0.984797	0.138956	0.568354	2.15878	0.639804	0.0295484	0.0297784	0.0105486	3.94066	0.317554	0.700507	0.899969	0.136738	0.226997	2.69228	0.543411	1.0757	1.44022	0.544877	0.143764	0.244061	0.424232	0.180072	0.217467	1.60513	0.148531	0.0998766	0.1626	0.776445	0.0358996	0.0289888	0.322719	5.60372	1.71247	0.678118	0.0280502	0.414175	0.199907	1.0745	0.205385	0.255832
TCGA-VS-A954-01	0.216703	0.0646566	1.34637	0.0143877	0.137034	3.56951	0.806187	0.782417	0.160007	0.0870253	0.919694	6.78502	0.508079	0.165595	0.197626	0.124456	3.40193	3.37194	0.335758	1.6786	0.10083	0.286948	4.59553	1.46926	0.996129	5.03906	2.65424	0.120146	0.78415	0.156413	0.47212	0.710926	6.22807	0.051112	0.810133	0.447628	0.597439	0.0187152	0.0697538	0.237971	6.18336	1.70108	1.40011	0.22063	0.950166	0.667518	4.38744	0.144238	1.12112
TCGA-VS-A957-01	0.751049	0.0933695	4.56698	0.0588151	0.417365	8.05665	1.06441	1.85476	0.227508	0.311341	1.21043	6.75317	3.3541	0.040275	0.558091	0.14378	1.80131	0.865663	2.02896	2.25491	0.174728	0.663002	0.849449	2.88042	1.06227	4.6707	1.96922	0.195953	1.93061	0.509241	0.409068	0.864535	3.90683	0.0590479	0.850835	2.06852	1.10432	0.0403972	0.499102	0.706936	15.1111	1.95314	0.660205	0.286747	1.75631	1.14389	3.08852	1.19976	2.36621
TCGA-VS-A958-01	0.17455	1.57215	1.14216	0.0254067	0.135464	4.64535	0.22264	1.6574	1.41274	0.0746195	0.618891	1.10355	0.964654	0.0631816	0.106122	0.0751851	4.28154	0.198043	0.53049	2.08707	0.121824	0.115565	1.1549	0.753112	0.483474	1.69906	1.85353	0.0426948	1.41337	0.283472	0.249561	0.600622	3.94971	0.0176441	0.177967	0.42494	1.80459	0.0336206	0.0924338	0.205372	2.10716	1.387	0.276186	0.133285	0.705205	0.383091	5.95222	0.243979	0.494933
TCGA-VS-A959-01	0.714912	0.491363	1.37707	0.0438145	0.484372	8.75736	1.23755	1.73838	1.91425	0.261962	1.31679	3.28381	1.53934	0.55452	0.620929	0.15397	1.20248	2.31753	2.70225	3.11844	0.249481	0.676181	3.74256	0.944252	0.26884	5.65412	3.2019	0.149886	1.05416	0.261357	0.917838	0.861566	5.89704	0.103237	0.885102	0.813715	1.73164	0.163292	0.232242	0.288395	5.68823	1.93294	1.35339	0.175468	1.09392	1.07749	8.61145	1.38675	1.11263
TCGA-VS-A9U5-01	0.797976	0.302189	1.89874	0.0545481	0.232896	8.96725	0.626355	1.85647	0.292857	0.410313	2.25556	5.36656	7.64818	0.133312	1.38081	0.396598	2.52951	0.278579	4.4334	2.98554	1.58512	1.30048	2.1244	1.36204	0.405154	3.58498	1.24156	0.204193	5.54927	0.990825	0.351045	0.436061	2.34688	0.148915	0.56326	1.76606	1.28614	0.0422703	0.114726	0.288887	8.01641	2.62502	0.946966	0.187486	3.55267	0.576693	11.414	0.759931	2.25349
TCGA-VS-A9U6-01	0.395943	0.278462	1.97397	0.0805977	0.297527	6.57462	1.38883	2.03694	1.0409	0.26159	0.701937	5.49694	3.18282	0.211566	0.326697	0.255821	2.83039	0.971815	2.164	2.34611	0.177649	0.524289	1.75609	1.3597	1.05781	2.75292	1.8496	0.121751	1.36899	0.495486	1.29393	0.53995	2.69223	0.248717	0.43253	2.02799	1.70757	0.235637	0.311868	0.50579	16.2173	3.38321	0.715991	0.205159	1.48806	1.45485	7.38612	0.813211	1.50255
TCGA-VS-A9U7-01	0.295639	0.297704	3.78527	0.0271781	0.123824	7.39313	1.22555	1.37834	0.251874	0.269183	0.939325	2.89902	1.35801	0.239504	0.808839	0.24559	2.56919	1.08159	1.01176	2.09984	0.243183	1.39811	3.20282	0.728894	0.84791	3.02334	2.37767	0.140494	0.593768	0.328396	0.897132	0.668817	3.8227	0.132345	0.322957	2.17789	2.07841	0.0217409	0.263122	0.417413	6.90617	2.08071	0.451077	0.580495	1.62696	0.822854	6.92684	0.379501	2.27533
TCGA-VS-A9UB-01	3.01044	0.960789	3.40544	0.0241966	0.21278	4.45116	1.00717	1.07606	1.71546	0.333725	1.11353	3.13795	3.07455	0.666911	0.180027	0.573953	5.52008	1.95179	1.58811	2.29368	0.154998	0.392093	1.60754	0.730051	0.430445	1.8815	1.39749	0.115885	1.73896	0.563461	0.604797	0.88378	2.38748	0.119727	0.805081	0.808252	1.26535	0.0551837	0.0768657	0.418075	5.36193	1.32619	0.234263	0.226106	2.11443	0.729691	7.80691	0.591271	1.26678
TCGA-VS-A9UC-01	0.357589	0.414644	1.90799	0.0288884	0.257894	6.13656	1.36832	1.35359	0.797635	0.136444	1.34123	2.91257	2.93984	0.337318	0.513868	0.238041	1.56289	0.379373	2.48739	1.67776	0.260918	0.387411	1.32362	1.76326	0.339732	5.19475	2.82736	0.0381669	1.14546	0.371155	0.47806	0.500361	4.81939	0.0295743	0.2983	1.43892	1.38019	0.125008	0.0729098	0.428382	4.31681	2.4892	0.218606	0.161349	1.63713	0.325441	7.21884	0.363509	1.21284
TCGA-VS-A9UD-01	0.267065	0.522918	2.75368	0.0347809	0.057573	5.00407	0.638707	0.995557	0.568823	0.186822	0.344333	4.82415	1.74429	0.0322231	0.0811846	0.201311	0.262034	1.08218	2.10077	2.65203	0.116496	0.265226	0.88351	0.90536	0.661031	3.87231	0.855284	0.143712	0.546563	0.644005	0.763666	0.385372	4.63654	0.107984	0.476512	0.709273	1.93274	0.032776	0.145585	0.377068	8.64619	7.8326	2.98441	0.433348	2.28342	0.637553	6.73561	0.959897	1.29531
TCGA-VS-A9UH-01	0.474224	1.49451	1.75527	0.0387514	0.122678	5.75309	1.5374	0.761599	0.25588	0.168941	0.904404	1.34203	1.74721	0.0953635	0.168185	0.204266	1.78361	0.691781	1.61081	1.77262	0.179279	0.261644	0.764306	0.438446	0.326051	1.87528	1.46543	0.100529	0.632951	0.178923	0.387438	0.368469	4.93366	0.0439416	0.765553	0.507277	1.37278	0.0401472	0.10833	0.223185	7.56804	2.21527	0.468971	0.105616	2.18327	0.59648	5.72067	0.220951	0.636941
TCGA-VS-A9UI-01	0.20597	2.20083	0.775983	0.0331359	0.133207	3.53227	0.591114	0.782298	0.315862	0.144084	0.99586	4.76232	2.2766	0.0994065	0.688738	0.532315	1.51568	1.23523	2.43028	2.29579	0.161723	0.136368	1.10072	0.444339	0.416751	5.09579	2.63851	0.0705323	0.476512	0.293954	0.126207	0.632531	5.42408	0.0364354	1.05001	0.592602	1.09311	0.0200118	0.125113	0.145405	1.94962	1.5474	0.407378	0.0982983	2.05134	0.317229	3.8269	0.514103	0.8453
TCGA-VS-A9UJ-01	1.28723	1.73936	1.57071	0.0303422	0.486685	5.97475	0.442042	2.19379	1.316	0.427144	1.27666	2.1821	2.08939	0.107524	1.0535	0.106626	2.81741	0.064197	2.65529	2.64881	0.172769	0.4589	1.00791	0.671346	0.32678	2.12846	1.40195	0.155005	2.04407	0.370341	0.24269	1.05512	6.4899	0.205185	0.858124	0.745085	1.16019	0.0516464	0.311527	0.372806	3.36868	0.844028	0.626692	0.34024	1.13501	0.495636	4.37398	0.711786	0.842286
TCGA-VS-A9UL-01	1.57189	0.0277696	2.29663	0.0849276	0.584985	10.1627	1.58287	1.86206	6.01932	0.38261	1.08001	3.94527	4.90468	1.19784	0.502986	0.267266	1.54228	0.911845	4.05255	3.31971	0.317575	0.602518	1.22109	1.4788	0.711832	6.4424	1.5897	0.20236	1.92871	0.561855	0.236568	0.789747	5.29335	0.464133	1.09656	1.66619	0.843916	0.068253	0.118547	0.272552	19.4525	3.72921	0.687245	0.300071	8.42609	1.185	1.97543	2.44493	1.08649
TCGA-VS-A9UM-01	0.298066	0.447838	2.3641	0.0417541	0.198276	5.89598	1.24918	1.07219	0.986743	0.19858	1.83917	1.10759	3.85076	0.0822024	0.673092	0.275117	2.67384	1.26992	3.41036	1.19661	0.252608	0.338301	0.780186	0.997332	0.445	2.62504	2.98571	0.149979	1.68226	0.712475	0.278306	0.35921	3.4886	0.0301296	0.607802	0.92354	2.30091	0.0481936	0.0397922	0.561118	4.67305	1.00891	0.303186	0.130058	0.68813	1.41656	3.68566	0.153046	0.965898
TCGA-VS-A9UU-01	0.405	0.142416	1.78968	0.0443233	0.399125	3.42498	1.03316	1.07432	0.0394337	0.152899	1.24949	2.42465	3.72071	0.460735	1.0201	0.373818	6.30116	1.57547	2.6893	1.37576	0.141332	1.91529	0.706723	0.784551	0.372791	3.49639	2.06744	0.1585	0.494223	0.831411	0.472689	1.0361	10.1124	0.0350904	2.24161	0.973163	0.925152	0.0299804	0.173018	0.653506	6.22256	0.819174	2.74638	0.0883584	1.82652	0.989117	5.21515	0.369694	1.4333
TCGA-VS-A9UV-01	0.309211	0.0889629	3.99407	0.0108288	0.0761814	4.72481	1.35224	0.528177	0.25591	0.089269	0.925492	3.51086	2.39685	0.0639571	0.214849	0.019027	2.29707	0.200474	1.57941	1.69492	0.184979	0.116984	1.03418	0.435631	0.728905	2.20363	1.66781	0.06915	0.880442	0.36521	0.252624	0.490317	4.17052	0.053582	0.40534	0.39105	0.937727	0.00210825	0.187137	0.457364	7.27168	2.04221	0.244629	0.219246	0.929679	0.115658	3.00604	0.246974	1.10749
TCGA-VS-A9UY-01	0.0355582	0.42172	1.60756	0.037047	0.196237	3.27034	0.544258	1.2605	1.22389	0.138191	0.389691	3.31431	3.07275	0.12871	0.194567	0.291009	3.62839	1.01437	0.432272	2.00812	0.260581	0.329591	0.579124	1.13969	0.799098	3.02856	1.94189	0.0904541	0.809981	0.342983	0.37766	1.08935	1.94216	0.0215661	0.25378	1.14897	1.63714	0.0392755	0.159501	0.368166	1.40484	0.380159	0.281315	0.217216	1.53683	1.25961	4.54241	0.979838	0.997633
TCGA-VS-A9V2-01	0.299225	0.994816	3.52604	0.0537056	0.324373	5.89719	0.817854	0.781713	0.247645	0.205998	0.716483	3.33571	1.5463	0.17536	0.441811	0.22095	3.81665	1.91228	1.06988	2.33322	0.432596	0.169809	2.00157	0.737735	0.38963	4.00488	1.4122	0.209115	1.0498	0.353416	0.349236	0.803458	5.50341	0.0259258	0.479416	0.870369	1.70882	0.0443007	0.0532627	0.844951	5.39491	2.03802	0.760915	0.277447	1.73505	0.717621	6.18793	0.187784	1.96483
TCGA-VS-A9V3-01	0.199483	0.357113	2.3733	0.0596	0.180617	4.52335	0.604302	0.48406	1.63154	0.116289	0.771596	6.66626	7.71715	0.0962758	0.333523	0.257775	4.50169	0.775999	2.85302	3.04551	0.261049	0.528293	2.1321	0.491823	0.674015	2.87219	2.85802	0.0780696	0.994009	0.510489	0.896372	0.782369	5.33108	0.105864	0.559318	1.28032	1.5399	0.102348	0.180205	0.187767	6.48562	0.951074	0.591822	0.228486	0.955883	0.929395	11.6996	0.33858	1.14615
TCGA-VS-AA62-01	0.367148	0.35328	1.19393	0.0483776	0.215284	4.56136	0.585376	1.3893	0.350332	0.174077	0.544379	1.06112	1.40189	0.230353	0.424113	0.347918	0.972625	0.499877	1.54904	2.26194	0.140935	0.145848	2.35447	0.678898	0.41543	2.41231	0.792121	0.064659	1.01927	0.238502	0.509928	0.673785	4.12526	0.0630915	1.08557	0.812562	0.627569	0.0525687	0.128092	0.380142	4.55309	1.63375	0.53736	0.224281	1.36604	0.3619	5.1285	0.527848	0.931458
TCGA-WL-A834-01	0.371885	0.0832181	0.589919	0.0102562	0.198821	3.48642	0.711515	0.810857	1.5208	0.104059	0.56339	8.08797	1.71892	0.323066	0.520024	0.304351	3.6488	0.626881	0.904183	2.07005	0.259551	0.541676	6.62458	1.10025	0.27176	3.96682	1.57961	0.152818	0.582394	0.51244	0.121531	0.253178	4.0334	0.0563873	0.947913	0.444445	0.974005	0.0362587	0.0486542	0.24503	7.12181	1.51514	5.41352	0.198778	2.29214	0.65868	8.54679	0.594066	1.26537
TCGA-XS-A8TJ-01	0.8072	0.26091	2.1341	0.0311481	0.350605	6.79047	0.800794	1.14391	0.142635	0.371798	2.56331	4.7307	2.40324	0.173145	2.9082	0.309059	3.49064	0.775319	5.25922	2.3104	0.187791	0.752158	1.97807	1.14249	0.840998	6.31732	2.6002	0.152102	0.606524	0.517889	0.732752	0.619447	7.83798	0.0211542	2.19467	1.20422	0.618169	0.0364869	0.173218	0.168842	12.4021	1.95231	1.53739	0.490814	5.89881	1.1189	12.894	1.83867	3.77452
TCGA-ZJ-A8QO-01	1.04869	0.348651	2.28141	0.0550891	0.186026	5.29826	1.71979	2.49098	0.459486	0.29344	1.38108	1.14741	5.05799	0.108455	0.47363	0.077436	4.6449	0.543926	1.60697	2.12931	0.146383	0.71415	0.426991	1.55132	0.828736	2.81932	1.5757	0.164166	1.16241	1.40376	0.31823	0.638558	4.18485	0.0575458	1.19142	1.89653	1.27212	0.110112	0.421871	0.253824	8.17131	1.29	1.70673	0.27455	1.17112	1.01063	5.06173	0.981202	1.31462
TCGA-ZJ-A8QQ-01	0.424513	0.407121	2.74171	0.0213711	0.27716	7.71156	0.560809	0.422282	0.217002	0.200333	0.987159	8.32551	3.53436	0.241467	0.718977	0.444074	1.60656	1.27785	0.71556	1.90088	0.222212	0.642423	2.31492	0.261658	0.254942	4.57492	0.858644	0.13647	0.280603	0.149224	0.941381	1.15782	5.08685	0.140994	0.494656	1.43613	0.744015	0.00310114	0.122792	0.285414	2.37934	1.76986	0.347844	0.219962	4.78631	0.200817	5.47548	0.787123	1.47521
TCGA-ZJ-A8QR-01	1.56491	0.247692	1.90722	0.0456147	0.335712	3.26799	0.681581	1.85237	0.819458	0.281838	1.37793	1.26861	4.83243	0.442107	0.4177	0.27949	6.17917	0.494924	1.55578	1.82551	0.0665978	0.404328	3.22474	0.988091	0.74979	3.87011	3.75715	0.179251	0.611327	0.803943	0.810769	1.05635	5.30118	0.0192911	0.739399	0.60821	1.06281	0.0585538	0.111762	0.287414	3.51861	0.551441	0.27177	0.131153	0.674204	0.405623	6.60749	0.335347	1.95946
TCGA-ZJ-AAX4-01	0.428615	0.543506	3.62619	0.0452399	0.328531	7.04195	0.394841	1.12548	0.389509	0.233204	2.08769	4.09483	2.00985	0.287306	2.14261	0.492322	3.13069	0.185259	1.3963	1.94315	0.19943	0.315307	0.775634	1.64382	1.24239	4.655	3.82096	0.102509	0.745819	0.403116	0.272359	1.06429	5.12804	0.231072	0.582674	0.37944	1.56243	0.0633179	0.05934	0.403441	5.3833	2.20175	0.772382	0.218191	1.36027	0.572121	3.08452	0.532536	1.9758
TCGA-ZJ-AAX8-01	1.28185	0.382459	1.59766	0.0617258	0.142116	4.97815	0.564469	1.57564	0.384831	0.0996339	1.2297	2.18317	1.90138	0.125204	0.167	0.0920235	1.82666	0.652987	3.23012	2.26791	0.106506	0.161654	0.372804	0.940589	0.270995	1.85676	1.37868	0.131388	1.59684	0.696919	0.124674	0.374908	2.45286	0.0401062	0.280059	0.5809	1.20324	0.070335	0.123593	0.201093	4.40453	0.802514	0.434624	0.13983	1.43379	0.639285	4.27232	0.877579	0.728755
TCGA-ZJ-AAXA-01	0.422752	0.189202	2.1196	0.0171185	0.294238	6.07614	1.51176	0.652034	1.31204	0.150213	1.4016	4.80004	3.03422	0.109302	0.78025	0.474748	1.85173	0.783106	2.85036	1.81956	0.22129	0.659751	4.28789	0.967839	0.516073	8.17498	3.5832	0.138858	0.736214	0.472565	0.419397	0.663656	12.4994	0.0289976	0.80048	0.3542	1.15718	0.0711333	0.234218	0.412133	16.2797	2.39074	0.925726	0.403513	3.79046	0.527864	3.75384	0.428107	2.3884
TCGA-ZJ-AAXD-01	0.686299	0.56823	2.28621	0.0378548	0.142032	3.74884	0.48146	0.91715	0.280657	0.245381	1.48214	3.02487	1.51714	0.115929	0.0834507	0.177369	2.69348	0.40046	3.53357	1.50211	0.239496	0.636135	0.0698594	0.846029	0.420632	3.86906	1.80459	0.107436	1.41676	0.661981	0.280351	0.345343	2.51686	0.0554988	0.20992	0.455669	0.832519	0.0846952	0.102616	0.516791	10.9964	1.78476	0.787289	0.131013	0.825374	0.517937	0.962752	0.191857	1.74115
TCGA-ZJ-AAXF-01	0.848161	0.463946	2.57875	0.03321	0.268171	4.29779	0.631072	1.18649	0.594139	0.161149	1.53401	1.87254	1.7992	0.159189	0.229183	0.182667	2.40408	1.13034	2.39239	2.13904	0.164433	0.374365	1.96653	0.755129	0.325824	2.94309	2.76392	0.129086	0.838554	0.677119	0.11549	0.962373	8.34601	0.0714459	0.624552	0.47971	0.974306	0.0273081	0.137974	0.532229	2.71488	0.721614	1.36067	0.125932	1.22192	0.936188	3.53006	0.319904	1.22357
TCGA-ZJ-AAXI-01	0.25809	0.0192512	2.69526	0.044816	0.0741842	3.21301	0.192031	0.931846	0.527719	0.160484	0.194111	5.53227	0.345779	0.0726604	0.287673	0.0555845	0.590865	1.89641	6.30583	1.06933	0.345248	0.740459	4.90399	0.477237	1.05117	4.36151	5.33627	0.126257	1.80658	0.152415	0.738002	0.248281	7.45109	0.0304368	1.31571	2.36095	0.640386	0.118193	0.125953	0.445373	11.2825	1.87681	1.34422	0.426996	1.55195	0.616127	2.69614	0.807389	2.13123
TCGA-ZJ-AAXJ-01	0.890465	0.0199263	2.22475	0.012279	0.26107	2.02481	0.539504	1.11483	0.121383	0.200717	0.0861073	10.3909	1.07371	0.225625	0.649658	0.191778	0.611583	4.58973	1.84664	0.541382	0.233057	2.35822	0.861097	0.164657	0.283378	6.2841	1.11068	0.0348491	0.554639	0.131466	1.12763	0.158146	7.26073	0.0270034	0.907896	1.28099	0.33142	0.0221603	0.0277383	0.502898	21.084	1.29937	2.85315	0.84994	3.63107	0.10286	1.40863	0.960166	3.25579
TCGA-ZJ-AAXN-01	1.02224	0.518499	1.31077	0.0224493	0.235061	3.4239	0.651936	0.704613	1.72439	0.0979944	1.86716	6.3028	2.22553	0.37824	0.362539	0.139433	3.10923	0.342424	3.60628	1.94735	0.190254	0.473758	2.42795	0.33604	0.645269	2.20428	1.53923	0.163358	0.46086	0.201227	0.375822	0.405961	5.38396	0.0878315	0.67746	0.573137	0.638803	0.0745764	0.0923446	0.192439	1.52385	1.29965	0.384147	0.162619	1.06291	0.453956	2.6341	0.442261	0.996687
TCGA-ZJ-AAXT-01	1.04701	1.05432	1.95395	0.0566182	0.154014	2.3393	0.294588	1.13495	0.975964	0.0837738	1.31023	0.956759	2.35165	0.408708	0.093611	0.0928498	7.49312	0.279512	4.8006	1.24815	0.236416	0.285434	1.5673	0.759228	0.319403	1.89841	2.07621	0.180774	1.51253	0.860785	0.150952	0.53323	3.79642	0.0280152	0.282574	0.245351	0.916901	0.047451	0.023022	0.289856	2.80501	0.952089	1.1085	0.0470285	0.474506	0.407884	1.72795	0.147576	0.82721
TCGA-ZJ-AAXU-01	0.286691	0.404663	1.31185	0.0304101	0.0950828	3.17686	1.54709	1.06717	0.443407	0.111417	0.497588	1.60937	2.30459	0.180938	0.107262	0.142487	2.18541	0.714896	0.867364	1.57914	0.115437	0.525631	1.16731	0.407787	0.904555	3.89972	1.90318	0.0949375	0.902658	0.40807	0.288276	0.469993	3.97493	0.185024	0.69703	0.468551	0.911989	0.0425523	0.151132	0.373641	2.84377	1.91168	2.02386	0.210495	1.42556	0.720069	1.50075	2.89755	0.947842
TCGA-ZJ-AB0H-01	0.816774	0.666582	2.40075	0.0191395	0.174006	3.35684	0.980521	0.567722	0.589435	0.112033	1.51768	2.67305	3.28285	0.52173	0.642632	0.393205	4.24264	0.903346	4.29469	2.42772	0.201196	0.445337	3.42344	0.651505	0.434155	2.26042	3.20692	0.103417	0.684019	0.690418	0.235517	0.895947	4.38618	0.0339963	1.12668	1.16966	0.927213	0.0186722	0.14667	0.452236	8.06735	1.01344	1.38739	0.275154	1.87791	0.591985	7.06974	0.69075	1.49138
TCGA-ZJ-AB0I-01	0.236619	0.0441243	1.56395	0.0120846	0.156429	0.931808	1.18209	0.493733	0.577893	0.113415	2.16097	4.16021	6.49878	0.133231	0.47953	1.10414	1.43166	0.434661	0.705029	1.21481	0.0825723	0.626639	1.16415	1.6043	0.585672	2.91103	3.11089	0.10032	0.687781	0.535653	0.579949	0.887158	2.12322	0.0119592	0.160834	1.01245	0.84805	0.032535	0.0884491	0.296962	3.57058	1.23068	0.857994	0.195737	3.8239	0.413024	2.38945	0.362236	1.45957
TCGA-ZX-AA5X-01	1.26588	0.939946	1.73424	0.0722919	0.238163	4.29797	0.623841	1.23032	0.490221	0.232565	0.704785	2.66082	1.9658	0.111081	0.209898	0.223062	2.59699	1.56684	1.19327	2.40994	0.240955	0.152384	1.58142	1.20585	0.370748	3.92065	1.16384	0.146372	0.798714	0.339804	0.32907	0.672755	4.13054	0.12796	0.586666	1.29893	1.76085	0.0227544	0.143392	0.649926	2.43119	1.92865	0.569028	0.30756	1.03801	0.877353	6.42312	0.390648	1.27088
TCGA-C5-A1M9-01	0.117494	0.0525841	1.53763	0.0168019	0.206009	4.1891	1.59856	0.707948	0.200201	0.152207	0.593327	3.60801	1.6922	0.146489	0.29764	0.118088	1.90213	0.50784	1.98848	3.01079	0.19134	1.76324	3.0697	0.579359	0.384679	2.55739	1.38629	0.0996283	0.703949	0.616766	0.511956	0.295613	6.53967	0.061363	0.938386	0.814774	1.07975	0.0449947	0.594136	0.387075	5.31895	2.11621	1.27037	0.314011	1.11129	0.666537	4.58815	0.578711	1.04037
TCGA-C5-A1ME-01	0.504408	0.210697	2.10704	0.020609	0.104389	3.54555	1.0294	1.45222	0.217734	1.08731	0.249299	8.91705	2.43284	0.178523	0.654226	0.405566	2.21058	1.35172	0.793549	1.8173	0.058674	1.02413	2.05378	0.455991	0.435983	4.39162	2.19919	0.0197405	0.299217	0.264781	0.219786	0.477773	9.15723	0.129168	1.71428	1.17588	0.537709	0.0859784	0.475564	1.29774	5.77553	11.4267	1.21047	0.577743	4.19582	0.372899	2.45901	4.60629	1.365
TCGA-C5-A1MJ-01	2.75846	0.208922	2.7769	0.0500667	0.278118	3.78447	0.500701	0.782038	0.412172	0.72733	1.6278	2.75968	1.49249	0.491558	0.374117	0.164516	2.64404	1.10057	1.36563	3.21655	0.177713	1.51724	6.58771	0.523149	0.82532	7.03109	1.90272	0.170236	0.838304	0.263148	0.346714	0.618654	5.59612	0.261676	0.562491	0.835908	1.02959	0.129338	0.228698	0.319562	3.49302	1.67995	1.71229	0.218735	1.54708	0.787604	4.4396	0.440648	1.62131
TCGA-C5-A2LS-01	0.647496	0.0652017	3.69763	0.056548	0.429922	8.69415	0.846536	1.01103	0.15446	0.583802	1.10615	8.67851	2.14704	0.242186	0.531445	0.167341	2.50943	0.986525	3.93573	1.46967	0.316337	0.51443	0.988645	0.758286	0.750454	4.71389	3.16501	0.171047	0.622238	0.790252	0.3703	0.344984	7.52785	0.235625	0.891232	0.802492	1.07107	0.143258	0.984282	1.00562	15.6687	3.3677	1.90817	0.247212	1.47225	0.737967	3.24676	2.26262	1.88428
TCGA-C5-A2M1-01	0.371042	0.202159	1.31791	0.027189	0.166932	4.26259	1.02884	1.702	0.219905	0.333539	1.01399	1.80672	2.75571	0.210218	0.519826	0.298797	4.92262	0.658929	0.253797	2.65907	0.123852	0.213616	7.718	0.815363	0.498175	3.25838	1.07679	0.498767	0.465089	0.400131	0.553558	0.530038	6.70919	0.0864275	0.312513	0.499849	0.604871	0.0338776	0.261313	0.440357	2.24846	2.40996	3.41407	0.166299	3.44375	0.591344	9.15336	1.29496	0.722254
TCGA-C5-A2M2-01	0.672326	0.10466	1.06651	0.060911	0.257107	5.25069	0.764346	1.8792	0.11954	0.368076	0.706668	5.00569	1.29239	0.246888	0.0888605	0.138502	3.26962	0.227424	1.27512	1.64293	0.183615	0.38707	1.42825	1.33329	0.891206	3.23662	1.51755	0.0800802	0.769909	0.684755	0.23882	0.294185	1.68784	0.239341	0.327842	1.15156	1.54733	0.153067	1.02895	0.0550293	6.40002	1.46969	1.01755	0.334815	0.900852	0.954456	2.53019	0.361892	0.994627
TCGA-C5-A3HF-01	0.804731	0.253234	1.13692	0.0300539	0.32094	4.4916	0.689641	0.898542	0.411361	0.422206	1.33748	2.32581	1.36453	0.279151	0.672729	0.35746	3.08426	0.929349	1.74438	3.2889	0.193067	0.932389	3.30219	0.651017	0.525626	3.886	2.23808	0.10826	0.77871	0.381178	0.493095	0.710875	5.00367	0.218615	0.717924	0.523171	0.617049	0.0529818	0.219342	0.236708	2.55287	3.18272	1.09425	0.307243	1.07744	0.639076	5.02146	0.662843	1.31354
TCGA-C5-A7CM-01	2.00139	0.0617736	3.03795	0.026435	0.416575	3.26131	0.220068	2.06299	2.09317	0.957507	0.90093	13.9872	1.17889	0.158211	0.671337	0.4459	2.64082	2.57279	4.24425	2.52684	0.264918	1.82769	1.19425	1.87167	0.452808	6.68974	2.07059	0.155302	1.52293	0.326048	0.507452	1.36356	6.56963	1.71264	0.879555	1.22191	1.01793	0.15528	0.126838	0.19488	11.2283	1.84459	4.21779	0.210792	7.01599	1.88137	3.35757	2.42539	1.33891
TCGA-C5-A7X8-01	1.46497	0.595256	3.2412	0.0283525	0.212759	8.16877	1.64731	1.55644	0.985343	0.485434	0.534338	6.04462	2.32427	0.390729	0.539089	0.348721	0.907815	1.09977	2.50874	1.07297	0.228707	0.561534	1.8444	1.42574	0.396836	5.98855	2.80718	0.226314	0.672353	0.57676	0.314966	0.736028	16.695	0.132497	1.29712	0.836155	0.924684	0.125906	0.192145	0.689463	20.5833	6.50552	0.762498	0.677072	2.34719	0.415635	2.9457	0.769806	1.70298
TCGA-DS-A7WH-01	0.784091	0.197391	1.2438	0.0981107	0.23101	1.60198	0.187522	0.450386	0.289474	0.233622	1.17944	4.20184	2.49493	0.0867218	0.119177	0.0985067	9.19979	0.360087	2.99043	1.39482	0.0342027	0.173043	0.498836	0.805485	0.436414	1.27205	2.86351	0.134252	0.779086	1.72356	0.240224	0.290112	1.65698	0.118888	0.09993	0.187994	1.31503	0.127414	0.20761	0.0615031	2.16919	1.51042	1.2665	0.0124734	0.331518	1.25292	1.1799	0.313135	0.360795
TCGA-EA-A4BA-01	1.88639	0.132432	3.90182	0.0294694	0.242403	4.48255	1.43895	2.3102	1.84033	0.316246	0.453052	4.14246	1.26366	0.464137	0.449758	0.302711	0.870992	2.66188	2.67148	1.47921	0.167799	1.61627	3.35092	0.638355	0.424336	8.0859	2.2943	0.159232	1.17168	0.116498	0.392848	0.437937	13.478	0.527184	0.829668	0.982333	0.509872	0.0986066	0.417093	0.765944	2.57764	4.13615	0.658412	0.932046	2.96094	0.467137	2.56126	0.54655	1.87679
TCGA-EA-A556-01	1.18134	0.622004	3.49987	0.0425882	0.317586	3.28384	0.864197	1.74488	2.5931	0.243056	0.559972	2.61091	2.02494	0.435991	0.54923	0.134694	1.70453	1.08128	1.61501	1.01396	0.533496	1.51826	3.8197	0.556813	0.409525	8.63838	2.8111	0.292353	1.64476	0.17099	0.369025	0.86904	12.2812	0.646239	0.425104	1.55332	0.938748	0.17412	0.409118	0.621384	5.26211	1.38547	0.549765	0.530622	3.77381	1.07562	2.03261	1.73448	2.12594
TCGA-EK-A2RL-01	0.636548	0.0712214	2.76104	0.0219442	0.233283	6.44372	0.672375	0.901034	0.155916	0.550429	1.53885	9.77359	1.91886	0.110405	0.604698	0.128524	1.3467	0.477184	1.80657	1.90278	0.138834	1.34335	0.870686	1.54488	1.05194	4.90526	2.70915	0.0856346	0.800047	1.28437	0.438797	0.400386	5.13756	0.367971	2.17013	1.30313	0.806171	0.113656	0.68409	0.355752	14.7466	5.56391	1.39276	0.334169	2.40727	0.621936	2.81425	1.37434	1.78117
TCGA-EK-A3GK-01	0.0638987	0.400368	1.68937	0.0489516	0.172647	6.16908	1.08671	1.53107	0.210499	0.155621	0.789533	3.26265	1.79779	0.185035	0.401439	0.146792	2.08983	0.317615	1.93438	2.60719	0.126358	0.761504	2.94864	1.83798	0.964023	3.12721	1.79507	0.100029	0.629222	0.477982	0.208819	0.444476	5.2019	0.0688971	0.43433	0.546819	1.02763	0.0424053	0.323782	0.100243	2.19728	1.15705	0.867822	0.138245	1.88116	1.18754	10.1653	0.774065	1.34775
TCGA-EK-A3GM-01	2.45049	0.0485271	1.4448	0.0578135	0.516114	6.23687	0.235114	1.01278	2.27618	0.441618	1.35606	1.23784	1.74323	0.0627967	0.276873	0.298908	1.74474	0.534271	2.4502	3.62719	0.0832439	0.229722	1.76594	0.45446	0.45156	2.33956	2.01769	0.0848692	1.43563	0.70863	0.0885857	0.481421	3.06268	0.140293	0.309544	1.07507	1.04029	0.149631	0.131051	0.59195	2.7488	1.34095	5.12121	0.0579568	1.23882	0.514356	3.15215	1.63683	0.711986
TCGA-EX-A1H6-01	0.887948	0.204377	2.15306	0.0660805	0.385029	4.98246	1.19731	0.977853	0.216142	0.453542	0.351633	4.89434	2.19234	0.0979534	0.894611	0.0764945	1.31928	0.690831	3.1023	1.35049	0.230185	1.14218	1.93683	0.969512	0.540235	4.29075	2.48021	0.183682	0.478576	0.958864	0.891264	0.161453	10.5312	0.176949	0.543198	1.41493	0.692441	0.0804339	0.489975	0.835794	9.10444	2.24318	2.48882	0.610227	1.65904	0.312592	5.58072	0.699092	3.07432
TCGA-EX-A449-01	0.419769	0.223995	1.9208	0.160294	0.835315	13.6182	0.638385	3.58838	0.0990354	0.83074	3.12242	9.40234	1.94674	0.257135	0.804893	0.250353	0.887086	1.10955	3.02487	2.57391	0.202826	1.582	2.56374	6.09019	0.687592	3.45739	1.74164	0.139006	1.09181	0.61656	0.633136	0.879314	6.50031	0.30355	2.13993	0.571706	1.08606	0.141782	0.424465	0.364721	12.58	3.65744	0.344869	0.46847	1.65042	1.10405	8.51003	0.502918	1.27217
TCGA-FU-A3EO-01	0.140897	0.0630582	2.54237	0.0291435	0.072898	2.94431	0.471754	0.331987	0.0600196	0.605069	0.249786	6.28642	1.91129	0.00850008	0.92087	0.303449	0.414729	0.0456747	0.579348	1.61807	0.110629	0.326497	1.93619	0.607915	0.348745	2.14295	0.617471	0.020678	0.213131	0.339762	0.201446	0.260658	3.07828	0.135303	0.754191	0.187098	0.553536	0.0297805	0.373065	0.331554	2.82197	15.5114	3.13508	0.201728	2.03869	0.151904	1.03032	0.576756	0.588754
TCGA-FU-A40J-01	0.388511	0.245474	4.09654	0.0938414	0.358664	7.44368	1.83645	1.16055	0.327103	0.399675	0.92817	4.65659	2.48009	0.110297	0.416834	0.17719	2.42169	1.91138	3.69345	2.16753	0.223304	2.26962	3.32661	0.929695	0.752425	8.41623	2.37288	0.169935	0.300962	0.652317	0.112027	0.273967	9.46884	0.164019	0.582524	1.44656	1.75157	0.105178	0.286183	0.795918	5.42999	2.4103	4.8365	0.279213	1.29694	1.18619	4.89077	0.365073	3.36283
TCGA-FU-A57G-01	1.23896	0.57582	1.43622	0.0184962	0.3616	3.03477	1.0738	2.13164	0.725351	0.187662	0.716792	1.69859	1.85144	0.797272	0.71463	0.465248	1.27796	0.535512	1.13588	1.81125	0.121947	0.336528	0.549735	0.822402	0.798798	6.90613	1.3708	0.0870294	1.00632	0.1751	0.103818	1.07198	3.6934	0.378927	0.550632	0.449975	0.490466	0.0387715	0.340419	0.269121	4.21856	2.65286	0.741426	0.291095	4.01162	0.371856	4.68407	1.21795	2.06706
TCGA-FU-A770-01	0.526427	0.100972	1.3719	0.0276539	0.350184	4.32766	0.239808	0.72995	0.166584	0.154902	0.84842	2.03768	1.43577	0.054443	0.251472	0.129573	4.90685	0.414441	1.12935	2.5198	0.288681	0.448117	1.87551	1.06613	0.543654	1.98258	1.34365	0.161874	0.173984	0.569951	0.122882	0.328338	3.63814	0.155839	0.690085	0.582537	0.5909	0.0064094	0.281115	0.141574	3.21878	3.87884	0.446226	0.0717814	0.862041	0.156366	2.45786	0.195218	0.392809
TCGA-IR-A3LA-01	0.674412	0.0986756	2.65397	0.0802802	0.796276	2.99853	0.909847	1.14939	0.185632	0.429439	0.501655	9.35225	1.87661	0.0375563	0.410027	0.07821	1.55247	0.4877	1.07584	1.15649	0.153881	1.33954	1.21457	4.50861	1.04763	5.04976	2.99053	0.07106	1.42177	0.153183	0.190727	0.241853	17.8512	0.18354	0.185127	4.24814	0.672215	0.0562401	1.1603	0.244154	4.12768	0.884417	0.451468	0.277294	0.526421	0.910866	2.14454	1.40882	1.1226
TCGA-IR-A3LB-01	1.45213	0.185685	2.04923	0.0323622	0.712281	3.38271	0.336765	1.35828	0.28278	0.586334	0.796322	2.62988	1.02329	0.100119	0.091726	0.105602	1.57281	0.293447	2.76464	1.01918	0.157947	0.024972	0.575902	0.627699	0.573483	2.54705	1.98354	0.158682	0.483285	0.508595	0.215706	0.167466	3.91421	0.148693	0.384561	0.333903	0.649911	0.0968228	0.234984	0.390526	4.38771	2.30504	0.619179	0.129604	0.652065	0.142324	0.591028	0.241008	0.844326
TCGA-IR-A3LF-01	1.60722	0.237737	3.04646	0.127717	0.718797	8.10447	0.399581	2.21873	0.408466	0.722016	1.48392	5.80642	2.0803	0.243223	0.844656	0.269875	2.69951	0.936056	2.92202	2.03159	0.266174	0.577139	1.74693	1.47757	1.33568	8.22002	3.61817	0.154584	0.85322	0.386093	0.333836	0.524113	6.75923	0.424057	0.638808	2.41156	1.49453	0.246654	0.841777	0.384615	7.50383	3.32169	2.62927	0.738435	1.63806	0.818136	6.39883	1.64273	2.06519
TCGA-IR-A3LI-01	0.250737	0.0641238	1.27846	0.0603695	0.259455	3.94962	0.319817	1.43605	0.183102	0.228299	0.265552	8.85136	1.36771	0.129656	1.63331	0.231432	1.23007	0.255456	0.537908	0.93885	0.0999988	1.32806	0.656303	1.36884	0.388413	1.83049	1.01431	0.049064	0.688445	0.232686	0.760873	0.371088	3.60543	0.148452	0.766936	1.04643	0.819647	0.100132	0.383832	0.134863	11.4786	4.76104	1.03435	0.560706	1.42697	0.540648	2.85453	1.23022	0.85529
TCGA-JW-A69B-01	1.25364	0.227602	1.42582	0.0449391	0.43241	10.2523	1.04088	1.24111	0.370797	0.474338	0.541326	2.76871	3.80284	0.325352	0.230094	0.0713196	1.4389	0.107349	0.828825	2.42238	0.206359	0.375852	1.15572	0.670653	0.570599	3.98129	1.11634	0.180513	1.13655	0.661185	0.599071	0.570617	4.3557	0.162588	1.32642	0.649135	0.65864	0.0472534	0.179784	0.289437	8.15106	2.44683	1.70291	0.144494	1.68904	0.670323	3.81237	0.784047	1.21431
TCGA-JX-A3Q8-01	0.105102	0.382186	3.95967	0.0185189	0.158603	7.71044	0.620023	1.752	0.376082	0.62699	1.67695	0.36072	4.32998	0.0760876	1.99687	0.101861	3.22257	0.425888	1.10859	1.95959	0.183386	1.56568	2.27344	3.62779	1.04058	5.3604	1.06293	0.0771238	0.420843	0.667234	0.729877	0.260547	5.88412	0.32138	0.884068	0.302392	0.420154	0.0632403	0.333945	0.54411	9.01132	5.61833	0.675598	0.712265	4.1179	1.23025	5.27801	0.33579	3.12916
TCGA-LP-A5U2-01	0.184869	0.110317	0.928645	0.0415432	0.127531	2.99034	1.59166	1.82906	2.59352	0.165246	0.387328	3.94048	1.42416	0.148704	0.262257	0.185803	2.35802	1.29846	0.991502	2.68918	0.516105	1.14237	7.1195	0.417808	0.314739	3.69897	0.810172	0.235138	0.965051	0.339654	0.704837	0.798012	3.79854	0.205559	0.219902	1.11833	1.23171	0.00693255	0.253384	0.377023	4.22677	1.42448	1.43819	0.188219	0.53267	0.417602	1.7657	0.393757	1.04838
TCGA-LP-A7HU-01	0.390967	0.174976	1.86057	0.0566352	0.263577	7.09766	1.47338	2.03491	0.314921	0.256922	0.996711	5.2646	1.35713	0.0943454	0.237699	0.107166	1.01131	1.45175	3.50748	2.6411	0.272869	1.08246	2.24311	2.01548	0.519464	3.24345	2.06085	0.201693	1.53069	0.531738	0.319418	0.341917	8.40307	0.301792	1.30458	1.14846	1.24446	0.122379	0.212575	0.401459	8.26932	5.84364	0.941988	0.379959	0.654533	0.498147	1.69735	0.837463	0.891108
TCGA-Q1-A5R1-01	0.970943	0.158775	1.83639	0.0526397	0.392864	6.03424	1.35753	1.94368	0.0763576	0.362828	0.529633	4.91084	2.40154	0.153197	0.817353	0.17694	3.95717	0.556866	2.72389	1.86679	0.247604	0.642838	1.71058	1.47313	0.572202	4.18029	2.92064	0.0803819	0.491788	1.07327	0.579686	0.337139	5.91512	0.286889	0.571125	0.694248	0.854529	0.0807136	0.777068	0.351506	16.3523	2.61131	1.00451	0.228124	2.91925	0.776465	4.87085	1.1931	2.06203
TCGA-Q1-A6DV-01	0.447296	0.557661	2.83817	0.0969253	0.391216	7.02147	1.48745	1.49663	0.195984	0.511569	1.85371	5.54041	2.24727	0.323815	1.14606	0.49543	4.2633	1.63643	2.51321	2.02017	0.222988	1.31149	1.46349	1.69359	0.682858	6.5698	2.54185	0.187557	0.955216	1.1761	0.28713	0.912606	6.00802	0.510276	1.43331	1.25864	0.96892	0.127653	1.70784	0.300731	9.0814	3.8497	0.240128	0.304957	3.45818	3.17391	7.15207	0.854884	2.97526
TCGA-Q1-A73P-01	0.669923	0.214159	1.69525	0.0508328	0.214566	5.03317	0.569662	1.09496	0.195685	0.538065	0.442157	1.70569	1.2822	0.277133	0.484878	0.13741	2.91091	0.413655	1.25469	2.24983	0.144722	0.337935	0.519562	0.904493	0.659258	5.42122	1.5701	0.124848	0.476881	0.433302	0.156378	0.443805	4.92854	0.167683	0.58546	0.691905	0.694802	0.0278408	0.33588	0.150137	2.62575	2.74691	1.02215	0.170516	2.48178	0.579769	7.08405	1.03194	2.18996
TCGA-Q1-A73R-01	0.774407	0.158851	2.62749	0.0725094	0.293079	7.86999	0.507601	2.1757	0.952995	0.525008	0.637906	1.64754	3.32872	0.150538	0.418508	0.565209	2.97595	0.278933	2.03053	2.29017	0.202682	0.427263	1.02914	1.59107	0.824861	3.68177	1.7404	0.227303	3.1927	0.766446	0.19332	0.961463	3.0716	0.193525	0.789566	0.952164	1.26321	0.145201	0.368546	0.28347	12.8662	2.55465	0.229749	0.353156	1.8271	1.13639	2.27286	0.532628	1.39967
TCGA-UC-A7PI-01	1.23049	0.123908	2.4643	0.0688139	0.387287	11.2701	0.588564	1.10347	0.199183	0.693404	4.29347	2.82284	2.0401	0.386013	0.61719	0.212007	3.07864	0.358999	1.58387	3.5078	0.15029	0.488807	0.0313134	1.17558	0.795259	6.22582	2.17775	0.150489	0.733582	1.417	0.226193	0.605521	9.26516	0.407352	1.4114	1.0757	0.737847	0.0964813	0.344972	0.347465	4.54074	2.87107	0.985658	0.164429	3.04062	0.762803	7.57488	2.23592	2.18524
TCGA-VS-A8QH-01	0.795381	0.110181	1.89256	0.0266943	0.228621	2.18437	0.507259	1.10288	0.309776	0.482803	0.708087	1.97039	1.52232	0.127957	0.414491	0.0652573	2.86146	0.245561	2.81681	1.41234	0.105738	0.651985	1.58071	0.700357	0.681532	4.13224	3.16649	0.133406	0.269614	0.223673	0.123776	0.426019	14.3924	0.0536	0.810952	0.502948	0.553427	0.0777302	0.0778686	0.606062	2.61868	0.72231	0.329611	0.21691	0.797135	0.250838	1.00612	0.226889	1.79745
TCGA-VS-A952-01	1.33005	0.0909422	2.84243	0.156235	0.847437	10.926	0.871805	1.64231	0.214039	1.93263	1.0956	8.67583	5.64283	0.615167	1.43758	0.28645	3.58872	0.191627	4.41214	3.09478	0.425463	1.85903	2.70775	3.05148	2.10183	15.7337	2.14221	0.14459	1.02569	1.03273	0.392397	1.73333	22.6586	0.855225	4.74629	3.71223	2.23068	0.268023	0.216364	0.834617	12.1233	8.18809	0.979178	0.775815	1.88839	0.825087	4.17933	1.41645	5.73417
TCGA-VS-A9UO-01	0.255591	0.0810256	4.83153	0.143589	0.455489	11.3423	0.36676	1.55502	0.152428	0.941991	1.13966	11.1421	2.26861	1.42886	0.582725	0.119267	1.88082	1.86424	6.39709	3.27477	0.393935	1.24095	1.019	0.52513	0.426775	6.01244	2.62794	0.0875244	1.031	0.566024	0.226218	0.806981	7.09643	0.325104	0.846932	1.89499	2.10808	0.177751	0.216294	0.220531	14.4574	2.25252	3.81668	0.268355	0.912551	0.37397	3.91605	0.952683	1.46216
TCGA-VS-A9UP-01	1.59446	1.93828	3.38377	0.121489	0.468214	7.83917	1.7864	0.87899	4.43507	0.636408	2.38915	12.1746	5.80239	0.582345	2.77719	0.482612	0.676508	1.73224	3.35898	2.11928	0.345879	4.73618	0.657984	2.12493	1.6152	12.8638	3.54464	0.379464	1.24238	0.262973	0.598522	1.22454	18.3928	0.291856	2.15292	5.15017	1.3544	0.403707	0.230889	1.13575	23.6939	4.37062	2.06263	0.44423	11.8553	1.7522	1.7364	3.33872	5.38927
TCGA-VS-A9UQ-01	0.507786	0.332771	1.611	0.0511264	0.243955	8.31197	1.24911	1.50004	0.370813	0.434154	0.771612	3.72139	2.04094	0.148793	0.573341	0.234345	1.74377	0.42328	2.87902	1.89154	0.278458	0.576331	1.36605	1.4755	0.735304	3.41286	2.05415	0.106461	0.942391	1.04242	0.237062	0.595847	3.39611	0.212648	0.628668	1.55729	2.2599	0.136014	1.36484	0.853502	8.25956	2.25328	0.717374	0.373893	1.62214	1.10608	3.98386	0.98498	1.20165
TCGA-VS-A9UR-01	0.518185	0.0981167	3.31959	0.0671798	0.274975	8.77009	1.27106	0.768184	0.475434	0.26025	0.860832	2.18886	3.92516	0.56751	0.969367	0.343387	2.4639	0.491018	1.68175	2.84348	0.361659	0.580593	0.568043	0.19655	0.617024	8.3743	1.20936	0.116998	0.695173	0.886658	0.358222	0.831801	5.75388	0.322338	0.365766	0.670456	1.12091	0.156814	0.211083	0.45023	5.90556	1.81979	1.68713	0.182622	3.53542	0.976127	5.41322	1.0188	1.10644
TCGA-VS-A9UT-01	2.98367	2.94782	0.982318	0.0966048	0.155341	6.1931	1.00528	2.35199	2.49402	0.29317	0.961731	0.813522	2.71523	0.339622	0.479171	0.169741	1.1047	0.401487	1.04669	2.92066	0.235744	0.149088	2.46408	2.15134	0.331765	4.04135	3.30214	0.198286	2.48458	0.265964	0.0919865	1.34141	4.21691	0.375578	0.860967	1.04657	2.11078	0.115918	0.445422	0.264946	1.94613	3.7088	0.155882	0.300909	1.73491	1.08381	2.68843	0.854328	0.789726
TCGA-VS-A9UZ-01	0.618266	0.244776	2.07467	0.0495502	0.172244	8.21648	0.33364	1.36479	0.162074	0.266155	1.18039	1.09963	3.91864	0.160672	0.92527	0.102427	1.07325	0.277509	1.87052	2.77581	0.232351	0.629752	1.01663	1.40707	0.575502	4.68722	2.72553	0.0558378	0.81251	0.337032	0.0777106	0.31674	10.3163	0.29806	0.630369	0.652587	1.28495	0.0830116	0.814811	0.447655	8.58586	3.40806	0.169316	0.16342	2.43085	0.666563	8.26148	0.816706	1.37691
TCGA-VS-A9V0-01	0.719586	0.0536748	3.17077	0.0343007	0.303358	4.38772	1.32577	0.832292	0.95365	1.1932	1.23704	1.38649	1.12476	0.964696	1.06942	0.41327	1.25517	0.829399	0.800455	2.35489	0.167408	0.317614	0.651092	1.08419	1.2942	7.4584	0.700784	0.219035	2.39043	0.220346	0.653219	0.709987	4.36703	0.274789	0.0815192	0.495466	0.484944	0.0109028	0.214191	0.451548	2.01816	3.60403	0.60092	0.0305261	2.67435	1.74863	2.02844	1.75618	1.45571
TCGA-VS-A9V1-01	0.717272	0.160507	2.75699	0.111588	0.608993	4.35959	0.387068	1.13318	0.20683	0.566088	2.22307	2.4717	3.43733	0.785548	0.603809	0.213892	2.81504	1.57397	6.35236	2.28106	0.23105	0.657538	1.46024	1.83644	0.789053	3.08814	2.90159	0.172745	2.23873	0.83631	0.135232	0.988063	5.72584	0.133854	1.68765	1.12342	1.18649	0.141824	0.340305	0.415473	7.75062	2.63056	0.545636	0.379179	0.995335	0.62884	2.86545	1.78481	1.0869
TCGA-VS-A9V4-01	1.10154	0.0579989	1.95294	0.0297836	0.257022	3.25957	0.454567	1.14848	3.20184	0.231675	0.960751	2.20046	4.55762	0.719265	0.630315	0.0837307	1.39867	0.210051	1.52909	2.90645	0.0452236	1.63021	3.69361	0.479263	0.448052	4.67787	2.44647	0.0507173	0.784125	0.191328	0.582321	0.421951	7.58385	0.0392991	0.330324	1.63482	1.10757	0.573888	0.238175	0.731887	4.69333	0.898702	2.17868	0.098956	3.57978	1.04787	1.62455	1.91491	1.17973
TCGA-VS-A9V5-01	1.00187	0.132855	4.1203	0.143269	0.383964	7.16483	0.638947	0.642031	0.139098	0.412433	1.94956	1.87676	2.60997	0.277581	0.473755	0.415559	3.78635	0.168402	6.103	2.21587	0.284875	0.589612	0.793192	0.731879	0.443185	3.05507	1.42601	0.116175	0.673555	1.12487	0.181893	0.878671	4.22715	0.247555	0.264829	1.5439	2.39382	0.0807058	0.279721	0.244488	4.29621	0.793419	0.763262	0.368343	0.599658	0.897253	4.9506	0.800215	1.6059
TCGA-ZJ-AAXB-01	0.894189	0.416867	2.12767	0.00685022	0.218469	6.75867	3.3266	1.42558	3.63132	0.162172	0.864675	10.0144	1.34775	0.125871	0.543646	0.0320967	1.16979	3.28519	0.479578	1.89269	0.156021	0.888032	8.34358	1.74531	0.245919	3.4151	3.06463	0.0583248	1.06087	0.234695	0.426152	0.783007	7.96556	0.165711	1.29157	1.81408	1.08881	0.0538544	0.0510662	0.561113	15.4151	3.14358	1.06114	0.284498	3.19257	0.504974	1.80151	2.29142	1.26773
[truncated: 645 more columns]

## Sheet: Fig.3
log2FC	log2FC>1 FDR<0.05	1>log2FC>0 FDR<0.05	FDR>0.05	-1<log2FC<0 FDR<0.05	log2FC<-1 FDR<0.05				number		log2FC	log2FC>1 FDR<0.05	1>log2FC>0 FDR<0.05	FDR>0.05	-1<log2FC<0 FDR<0.05	log2FC<-1 FDR<0.05			number		log2FC	log2FC>1 FDR<0.05	1>log2FC>0 FDR<0.05	FDR>0.05	-1<log2FC<0 FDR<0.05	log2FC<-1 FDR<0.05			number		log2FC	log2FC>1 FDR<0.05	1>log2FC>0 FDR<0.05	FDR>0.05	-1<log2FC<0 FDR<0.05	log2FC<-1 FDR<0.05			number		log2FC	log2FC>1 FDR<0.05	1>log2FC>0 FDR<0.05	FDR>0.05	-1<log2FC<0 FDR<0.05	log2FC<-1 FDR<0.05			number
-1.32952					1.61664			FDR>0.05	13		-1.49811					6.62676		FDR>0.05	22		-2.31234					12.894		FDR>0.05	119		-2.5669					12.1604		FDR>0.05	144		-2.30367					12.812		FDR>0.05	191
-0.82445				2.45478				log2FC<-1 FDR<0.05	1		-1.31285					7.58385		log2FC<-1 FDR<0.05	4		-1.42984					4.61772		log2FC<-1 FDR<0.05	4		-1.91559					11.6445		log2FC<-1 FDR<0.05	3		-2.18868					15.0577		log2FC<-1 FDR<0.05	10
-0.81713				2.23708				-1<log2FC<0 FDR<0.05	5		-1.06503					4.49373		-1<log2FC<0 FDR<0.05	5		-1.32343					1.89257		-1<log2FC<0 FDR<0.05	8		-1.21466					3.74546		-1<log2FC<0 FDR<0.05	11		-1.96539					10.1078		-1<log2FC<0 FDR<0.05	33
-0.80504				2.48362				1>log2FC>0 FDR<0.05	7		-1.0303					3.27372		1>log2FC>0 FDR<0.05	8		-1.15359					4.91628		1>log2FC>0 FDR<0.05	106		-0.92113				3.3525			1>log2FC>0 FDR<0.05	153		-1.90774					6.32421		1>log2FC>0 FDR<0.05	178
-0.38594				2.45478				log2FC>1 FDR<0.05	1		-0.80303				5.64839			log2FC>1 FDR<0.05	2		-0.9635				4.3241			log2FC>1 FDR<0.05	67		-0.87555				2.0275			log2FC>1 FDR<0.05	70		-1.28632					3.21808		log2FC>1 FDR<0.05	22
-0.30289				1.50411							-0.74044				6.5721						-0.95254				2.44641						-0.86442				4.57155						-1.2859					8.49867
0.372551		1.4023									-0.55393				3.30357						-0.79729				3.93874						-0.60138				2.36476						-1.17813					5.6458
0.420464		1.72116									-0.42231				2.44706						-0.76634				1.51309						-0.48982				2.5384						-1.16267					4.88775
0.525165		1.72116									-0.34521				2.18522						-0.60368				3.51915						-0.48453				1.5436						-1.11992					5.16342
0.567996		1.6617									0.437718		2.52353								-0.51385				2.7728						-0.42526				1.60217						-1.05617					8.26369
0.644616		1.59249									0.458275		2.57022								-0.3271				1.5792						-0.40386				1.42809						-0.89451				5.97587
0.831876		6.24329									0.470421		2.41982								-0.31799				2.02532						-0.38777				1.81809						-0.80184				5.63117
0.874179		1.72116									0.521371		3.30357								0.016626		2.99736								-0.34753				1.4216						-0.79761				2.58234
1.54109	3.54278										0.651897		2.52353								0.105953		3.63802								-0.039				1.44753						-0.76846				2.18683
-0.81708			0.864665								0.759202		2.71179								0.268366		2.14663								0.057122		2.403								-0.74394				6.03883
-0.74099			1.29319								0.774323		3.055								0.303746		1.30243								0.221451		1.5436								-0.73091				3.37603
-0.60127			1.07562								0.962725		9.15415								0.305158		1.92121								0.242176		1.73704								-0.72431				5.75454
-0.19727			0.178268								1.04102	5.7392									0.30695		1.50046								0.256393		1.33687								-0.65257				1.91554
0.088079			0.778587								1.05228	3.37109									0.314469		2.36959								0.272693		1.37991								-0.64176				6.10374
0.100422			0.178268								-0.33815			0.307711							0.323841		2.12705								0.277723		1.43039								-0.62586				10.9122
0.122254			0.031994								-0.2694			0.551722							0.329131		1.93552								0.280867		1.65008								-0.60299				2.7077
0.128987			0.088385								-0.17474			0.619909							0.346943		1.52793								0.281967		1.8057								-0.58963				3.52905
0.155593			0.219136								-0.16998			0.87444							0.355629		2.13699								0.292568		1.53686								-0.5471				2.24987
0.183604			0.969095								-0.13265			0.551722							0.369971		2.105								0.297022		1.33687								-0.54531				3.70799
0.267371			0.178268								-0.11144			0.426319							0.381025		1.52793								0.301601		1.34897								-0.54307				3.24687
0.352579			0.031994								-0.10659			0.098519							0.393882		2.5752								0.305992		2.51321								-0.53723				3.71924
1.04575			0.864665								-0.10151			0.050781							0.39761		2.7728								0.31089		2.66292								-0.53687				3.52905
											-0.04558			0.076457							0.406521		5.18495								0.311922		1.31196								-0.531				4.3739
											-0.00488			0.063987							0.42935		3.42796								0.319852		1.58608								-0.51127				3.38727
											0.024954			0.125544							0.431589		2.09766								0.337587		1.50339								-0.50502				2.5873
											0.074843			0.335582							0.433147		1.4331								0.347049		1.8057								-0.47093				3.52011
											0.126675			0.179598							0.442562		1.87622								0.350299		1.60902								-0.44871				1.3813
											0.130596			0.125544							0.453574		3.21191								0.3547		3.59204								-0.41214				1.78805
											0.20497			0.274499							0.464894		4.04158								0.360525		1.58849								-0.40912				2.16999
											0.236203			0.296503							0.475684		2.55601								0.361613		2.27845								-0.35856				1.81018
											0.273796			0.965485							0.482532		2.60008								0.363167		1.83505								-0.35615				1.73073
											0.317582			1.11784							0.486374		1.991								0.368973		1.8057								-0.33088				2.08925
											0.38215			0.494797							0.508709		3.21191								0.378166		2.13173								-0.33034				1.81463
											0.521775			1.15254							0.511886		2.36959								0.381558		1.6226								-0.32406				1.82575
											0.526455			0.226319							0.513577		1.33447								0.389222		2.73521								-0.32337				2.08925
											0.56321			1.11784							0.524519		1.95751								0.392671		2.13173								-0.1914				1.5144
																					0.526106		3.58019								0.400125		1.98202								-0.17227				1.34849
																					0.54024		2.47616								0.408454		2.33466								-0.05888				1.39515
																					0.541815		2.25443								0.408474		1.73955								0.001459		1.77464
																					0.54435		2.40676								0.416592		2.27565								0.237442		1.38334
																					0.549557		1.56412								0.42103		1.98202								0.244084		1.47612
																					0.550465		3.51346								0.424904		2.60602								0.269328		3.08119
																					0.55099		2.11738								0.425121		2.04016								0.277049		1.52282
																					0.55187		2.80988								0.426205		1.63848								0.282513		1.8861
																					0.569873		3.77513								0.427626		2.00229								0.300843		1.97961
																					0.572066		1.64786								0.438109		1.823								0.323377		1.38119
																					0.575018		2.29857								0.441024		2.33466								0.32713		1.77472
																					0.57969		2.19498								0.441596		1.51221								0.327217		3.86398
																					0.58666		1.88563								0.443296		3.22557								0.328315		1.77236
																					0.589193		2.11966								0.450393		1.96444								0.328387		1.848
																					0.591456		3.31221								0.46088		1.47326								0.331906		1.31606
																					0.593323		3.48567								0.464152		2.36486								0.33245		1.97961
																					0.596248		2.31946								0.469818		2.96678								0.33268		1.82573
																					0.598761		1.96433								0.471712		2.13202								0.337196		1.32939
																					0.602231		2.37701								0.478799		3.59204								0.337493		2.10548
																					0.605776		3.13224								0.491322		2.96373								0.34016		2.06331
																					0.620057		3.56259								0.492314		2.77018								0.343496		1.78353
																					0.620756		3.39397								0.494436		3.52662								0.356502		1.52271
																					0.630951		3.82386								0.494638		1.87851								0.369069		2.26435
																					0.639971		3.54055								0.494696		4.18894								0.376355		1.93375
																					0.646078		2.87624								0.496654		2.49371								0.37888		2.43289
																					0.659702		2.87874								0.49789		1.54617								0.383462		1.81013
																					0.664462		3.5714								0.501331		3.42605								0.384641		1.78353
																					0.669967		2.18488								0.502342		4.13779								0.387268		1.73061
																					0.674091		2.97374								0.505432		2.4029								0.387344		2.39332
																					0.674497		1.8669								0.506654		2.28392								0.388183		3.53766
																					0.675954		3.04841								0.509117		1.45608								0.40047		1.91554
																					0.678452		1.53609								0.515879		2.78197								0.402568		3.06449
																					0.679276		2.66724								0.517121		3.54286								0.406073		1.47004
																					0.680938		3.23801								0.518381		1.83522								0.407489		1.69787
																					0.686464		2.35115								0.518633		3.87152								0.408177		1.72404
																					0.686583		3.31786								0.52038		2.33764								0.413472		2.38592
																					0.688081		3.39988								0.523912		3.06114								0.414847		4.23778
																					0.688215		1.46022								0.531944		2.95458								0.417445		2.08925
																					0.689225		1.39373								0.535008		2.71198								0.419337		1.51654
																					0.701551		1.64786								0.53985		1.51675								0.420105		2.13888
																					0.70871		2.61097								0.542372		1.56832								0.421263		1.97961
																					0.709358		4.0114								0.558961		2.06293								0.427716		2.01654
																					0.709862		3.53933								0.560221		3.36511								0.429667		2.02582
																					0.719785		2.26201								0.564348		5.03017								0.430436		1.72176
																					0.723184		3.53703								0.56819		1.6454								0.430556		2.31351
																					0.725058		3.21324								0.570292		3.49113								0.432553		2.7077
																					0.72986		5.62413								0.571234		1.99719								0.437985		2.45575
																					0.741326		4.90282								0.572665		1.95425								0.44176		2.7767
																					0.743622		3.21191								0.57501		3.61805								0.441984		1.91322
																					0.743684		3.25754								0.582964		3.05808								0.447131		1.61967
																					0.779241		6.13925								0.583341		1.5215								0.447824		2.67383
																					0.78045		3.19998								0.588643		3.22862								0.448553		6.45813
																					0.791219		6.06893								0.592198		5.09941								0.450308		1.97961
																					0.797115		5.38879								0.593349		2.85862								0.45145		3.48935
																					0.807719		3.12092								0.593715		3.08572								0.453684		3.02494
																					0.827585		2.14923								0.595014		1.79844								0.454697		3.53276
																					0.835018		3.62564								0.595496		4.13779								0.454946		2.90917
																					0.83653		4.27843								0.598168		3.02141								0.456351		5.03262
																					0.840428		6.03773								0.598773		1.91971								0.456821		5.72377
																					0.859068		3.53469								0.598903		2.85872								0.458023		2.38106
																					0.859944		3.98856								0.603644		5.18218								0.45841		2.08925
																					0.870658		6.69843								0.610143		1.77227								0.459079		2.28381
																					0.885519		4.60989								0.614725		4.1175								0.462857		1.75252
																					0.915		3.04841								0.618511		3.11658								0.467951		2.3434
																					0.917354		5.49142								0.621576		3.96014								0.472812		4.35185
																					0.945594		4.08962								0.626509		3.06419								0.477777		2.6869
																					0.950021		5.20244								0.634174		3.38762								0.479041		3.64754
																					0.955251		3.49139								0.636877		4.8475								0.479407		1.60294
																					0.960781		5.0019								0.637528		2.69745								0.482366		1.48621
																					0.96744		6.4373								0.63809		5.25903								0.487901		2.26435
																					0.971571		7.22548								0.638596		5.63749								0.48807		1.70667
																					0.972126		4.86608								0.640272		1.59754								0.492839		4.12888
																					0.973765		6.96011								0.641073		2.97284								0.496123		4.80339
																					0.975006		5.43885								0.660891		3.90532								0.49703		5.07511
																					0.980299		5.95201								0.664157		3.87152								0.497918		2.39563
																					0.997416		5.16747								0.670926		4.68845								0.499085		1.97961
																					0.999877		2.8682								0.708356		3.4942								0.507095		3.54874
																					1.00161	6.60367									0.708654		4.31517								0.507743		3.14663
																					1.00704	6.14063									0.714485		5.93313								0.512509		4.0806
																					1.00821	2.67255									0.720756		3.11658								0.513764		3.47192
																					1.02299	5.31671									0.724729		2.34579								0.516704		3.46673
																					1.03575	4.61967									0.726984		4.17167								0.519571		2.53827
																					1.06148	6.97337									0.731518		4.4825								0.52336		2.5432
																					1.07699	6.4373									0.733702		3.75868								0.526716		1.74808
																					1.08701	8.23715									0.735358		4.51063								0.528621		1.77226
																					1.09663	5.03491									0.73723		4.4463								0.532027		6.48702
																					1.11331	2.40676									0.740804		5.07476								0.532515		5.15103
																					1.1227	8.097									0.750554		3.2005								0.533989		5.23146
																					1.14119	7.86209									0.753268		5.44027								0.53544		2.62641
																					1.153	3.82386									0.755592		4.7054								0.536327		1.70227
																					1.16349	6.24239									0.755701		5.07476								0.538024		2.94989
																					1.18353	3.9619									0.757067		3.3525								0.538699		2.7054
																					1.18997	4.60989									0.757711		7.16735								0.54024		1.97961
																					1.2011	3.53933									0.777193		4.51063								0.544941		3.29066
																					1.22578	4.4511									0.777672		2.78197								0.550444		3.80901
																					1.24907	5.37125									0.781945		2.23863								0.556133		1.99334
																					1.25408	7.92984									0.785601		4.76768								0.561729		4.02436
																					1.27054	8.42879									0.794878		3.54286								0.562929		1.7881
																					1.28789	3.82175									0.82747		5.16967								0.563737		2.08925
																					1.3159	6.63964									0.828221		2.89759								0.569019		1.52282
																					1.31615	8.42879									0.83527		4.68845								0.570874		5.34577
																					1.32773	3.12908									0.845164		3.12568								0.576655		2.40276
																					1.37551	10.7627									0.853379		1.78887								0.577524		2.40276
																					1.37858	14.2647									0.857304		3.61805								0.578419		3.52011
																					1.3893	2.87074									0.862412		6.75876								0.58507		3.41975
																					1.40166	7.44166									0.862723		4.57924								0.592552		1.39117
																					1.44486	8.83011									0.869841		5.22863								0.592922		5.16288
																					1.45054	7.33521									0.872549		6.21894								0.593152		3.17228
																					1.45367	6.13925									0.874935		4.0158								0.594299		2.65008
																					1.47598	10.2014									0.88524		4.65265								0.595136		2.75529
																					1.47937	4.648									0.888565		3.24125								0.595359		1.67231
																					1.48663	8.17941									0.894208		2.89147								0.595359		6.52835
																					1.53191	7.0005									0.899629		4.14368								0.598081		5.57296
																					1.54003	9.7908									0.901322		7.19098								0.600146		3.21366
																					1.5452	10.9014									0.917961		2.0099								0.600194		2.2207
																					1.56651	10.7319									0.926379		3.93618								0.601286		3.19215
																					1.59561	8.48725									0.940624		4.76134								0.605588		3.20912
																					1.61555	4.98838									0.945439		5.25903								0.60612		3.21366
																					1.64585	4.76797									0.95118		4.68198								0.608392		4.69355
																					1.66942	5.44412									0.961716		7.13887								0.608479		5.63117
																					1.71528	7.80507									0.963924		1.52127								0.609498		2.25464
																					1.77482	11.2296									0.973043		1.97445								0.610563		4.05245
																					1.79064	8.83011									0.977336		1.95425								0.611		6.34505
																					1.79923	11.7088									0.980397		11.4067								0.620808		2.52549
																					1.81087	9.25886									0.985027		5.97776								0.620939		2.39563
																					1.86728	13.9941									0.995469		2.89455								0.630129		4.88878
																					1.87634	10.8679									1.0031	2.21753									0.632522		7.92969
																					1.88971	6.3747									1.00568	4.4825									0.643295		5.09445
																					2.05563	10.7984									1.01531	1.95406									0.643955		1.7548
																					2.07956	12.3551									1.03019	6.01092									0.646045		3.48935
																					2.08819	6.4373									1.03409	7.98771									0.648861		1.4285
																					2.11034	13.8694									1.0525	5.26708									0.651303		3.01976
																					2.21077	8.42879									1.1058	7.12423									0.653987		6.873
																					2.22291	16.0318									1.12271	7.28542									0.655534		1.97039
																					2.24443	8.25853									1.13219	6.98202									0.656101		4.14714
																					2.38312	13.0713									1.13813	5.32185									0.661407		3.68404
																					2.45021	17.1103									1.14629	3.40029									0.68076		3.52011
																					2.46217	13.9941									1.15838	6.98202									0.683562		1.39525
																					2.88958	16.5133									1.1762	3.50054									0.694394		7.92186
																					3.00758	10.708									1.18043	5.99221									0.696043		4.52971
																					3.1242	17.2714									1.1874	6.09913									0.69668		2.73939
																					3.44068	11.0391									1.21341	5.40965									0.697904		5.05203
																					3.60075	17.6778									1.21507	8.70825									0.699589		7.54874
																					4.40664	15.583									1.21951	7.20077									0.703384		6.98801
																					-1.85092			0.821132							1.22277	5.07228									0.704941		3.8494
																					-0.86088			0.214522							1.23236	5.93146									0.721325		4.18561
																					-0.8035			1.16753							1.23822	5.17541									0.723734		5.52269
																					-0.65578			0.767234							1.24756	8.29412									0.733852		2.93068
																					-0.64957			0.154095							1.25616	7.12423									0.737351		5.48798
																					-0.60858			0.135594							1.26057	9.36825									0.754523		6.29061
																					-0.55366			0.96133							1.26875	8.40421									0.756483		3.43103
																					-0.53647			0.876181							1.27923	6.8579									0.760657		2.92553
																					-0.46425			0.268056							1.32395	10.2919									0.765187		4.70897
																					-0.45521			0.104785							1.33854	4.1175									0.766171		5.94124
																					-0.41177			0.540884							1.35699	5.63749									0.769455		4.46314
																					-0.38052			0.723439							1.37371	8.8985									0.771353		2.13888
																					-0.35188			1.09686							1.4012	8.93211									0.778396		7.92969
																					-0.34732			0.943578							1.40529	9.71009									0.78073		3.80411
																					-0.34467			1.03577							1.4077	8.8985									0.784924		1.65323
																					-0.31975			1.10396							1.40858	11.1561									0.790871		6.15993
																					-0.30008			0.196848							1.43777	9.86562									0.795723		3.01742
																					-0.26683			0.525326							1.46535	5.75056									0.809804		6.58649
																					-0.26216			0.97982							1.47476	12.393									0.819302		3.08927
																					-0.25778			0.085269							1.4814	9.67622									0.827265		6.16099
																					-0.25389			0.944632							1.49532	11.003									0.872079		7.21472
																					-0.24791			0.69701							1.4994	6.43765									0.877667		5.93066
																					-0.21283			0.471729							1.53825	6.93926									0.886314		3.49653
																					-0.19442			0.062388							1.56686	8.75902									0.891634		9.8414
																					-0.1778			0.233454							1.57427	10.4365									0.893974		3.87855
																					-0.16692			0.072146							1.71807	8.51991									0.903993		3.20912
																					-0.16445			0.33176							1.74788	6.8579									0.922736		3.32572
																					-0.15684			0.184421							1.77548	11.4067									0.926065		11.4435
																					-0.15414			0.095643							1.77966	13.696									0.935257		8.18829
																					-0.14501			1.19953							1.82314	9.3917									0.951055		6.08969
																					-0.14234			0.087679							1.87639	4.55375									0.956967		5.78128
																					-0.09655			0.015774							1.87757	15.1123									0.959516		5.3574
																					-0.09538			0.190594							1.91383	11.4845									0.963589		9.66364
																					-0.09362			0.200009							1.91551	10.3709									0.971895		7.36754
																					-0.08516			0.098929							1.91819	12.2419									0.981159		6.58885
																					-0.0745			0.03318							1.97007	11.0064									0.993463		2.23526
																					-0.07345			0.125201							1.9939	13.4454									1.02416	5.89984
																					-0.06651			0.042833							1.99481	12.5642									1.04255	8.09788
																					-0.06172			0.192771							2.11019	14.7088									1.0564	1.91552
																					-0.04242			0.221116							2.14759	14.7088									1.06185	5.36893
																					-0.00993			0.295038							2.14919	4.05411									1.09492	6.13396
																					-0.00455			0.209954							2.23072	14.4753									1.11533	1.60281
																					-0.00245			0.20288							2.23749	9.41591									1.12387	4.46314
																					-0.00059			0.200329							2.60136	16.0424									1.13318	12.812
																					0.001856			0.03318							2.62105	4.35473									1.15201	4.51452
																					0.009278			0.779083							2.6336	13.9359									1.18322	8.34776
																					0.010092			0.406374							2.67142	9.62875									1.2037	10.6816
																					0.018074			0.639083							2.84678	9.94947									1.35913	2.5949
																					0.022342			0.101441							3.43316	14.4753									1.46507	10.6816
																					0.031948			0.078267							3.57758	2.96368									1.49502	6.19475
																					0.037744			0.252091							3.61384	16.5379									1.50685	2.18683
																					0.069531			0.025726							4.27562	16.5379									1.53212	12.0215
																					0.070733			0.368998							-1.35653			0.621952							1.60392	11.9968
																					0.073806			0.113223							-1.35598			0.204287							1.60551	12.0215
																					0.076994			0.16323							-0.76656			0.69208							1.74094	5.30366
																					0.088706			1.06229							-0.61914			0.19887							1.7915	6.83653
																					0.089241			0.3042							-0.61589			1.15149							1.82386	4.43055
																					0.089954			0.317302							-0.4336			0.307604							2.18013	8.91096
																					0.093659			0.548537							-0.42898			1.21803							-0.8568			0.910304
																					0.096776			0.448277							-0.35922			0.398545							-0.60915			0.590401
																					0.11522			0.95988							-0.34031			0.418764							-0.51149			0.066213
																					0.13203			1.12195							-0.32297			0.422671							-0.478			0.826282
																					0.143073			0.201603							-0.32078			0.678647							-0.44295			1.19352
																					0.143427			0.743453							-0.30629			0.34442							-0.37191			1.20805
																					0.144134			0.187497							-0.30455			0.658004							-0.2931			0.957059
																					0.153867			0.654608							-0.30037			0.227147							-0.27487			0.630025
																					0.155608			0.56439							-0.29603			0.833009							-0.26759			0.534651
																					0.158925			0.779083							-0.29571			0.230532							-0.26077			0.241015
																					0.160016			0.410694							-0.28238			0.643484							-0.25433			0.209219
																					0.163514			0.047084							-0.27041			0.382443							-0.25061			0.578745
																					0.169613			0.746176							-0.27013			1.08729							-0.23582			0.503786
																					0.174326			0.503442							-0.25579			0.158752							-0.23543			0.555876
																					0.186666			0.316764							-0.25285			0.708663							-0.2337			0.553381
																					0.190617			0.984747							-0.2047			0.147592							-0.22683			0.166971
																					0.200608			0.732235							-0.18053			0.422273							-0.22102			0.81413
																					0.218517			1.20657							-0.17324			0.560944							-0.21778			0.827835
																					0.223278			0.111439							-0.15974			0.150742							-0.20983			0.241015
																					0.236227			0.326727							-0.1503			0.180733							-0.19051			0.626104
																					0.24019			0.702643							-0.13178			0.407999							-0.18383			0.750433
																					0.241469			1.04083							-0.11742			0.518027							-0.18117			1.23005
																					0.251467			0.118336							-0.10786			0.926476							-0.17699			0.05088
																					0.253355			0.56439							-0.10584			0.069258							-0.16587			0.308997
																					0.266932			0.008682							-0.10143			0.383497							-0.16505			0.300407
																					0.269592			1.11479							-0.09994			0.15357							-0.1643			0.329978
																					0.271518			1.14952							-0.09155			0.007385							-0.13949			0.016716
																					0.274319			0.359645							-0.08127			0.571429							-0.13674			0.040788
																					0.276746			0.746176							-0.08027			0.158752							-0.13298			0.539561
																					0.29525			0.739192							-0.06063			0.141869							-0.12327			0.558376
																					0.305259			0.822389							-0.05868			0.130617							-0.11959			0.308997
																					0.328337			0.214522							-0.03692			0.224772							-0.1097			0.440029
																					0.333061			0.624103							-0.02218			0.136211							-0.10619			0.299754
																					0.334387			0.928793							-0.01971			0.010966							-0.10543			0.386112
																					0.341798			0.943578							-0.01856			0.023534							-0.09604			0.183464
																					0.358898			0.783226							-0.01811			0.078772							-0.09224			0.299754
																					0.375948			1.22964							-0.01705			0.163448							-0.0883			0.585213
																					0.379016			0.884193							-0.01568			0.150742							-0.08364			0.265417
																					0.38405			0.03318							-0.00215			0.422273							-0.08203			0.232378
																					0.396267			0.937029							0.000153			0.104011							-0.08188			0.202804
																					0.404417			0.635149							0.001243			0.090058							-0.07961			0.289125
																					0.421019			0.671771							0.002148			0.053448							-0.07406			0.091809
																					0.432687			1.17675							0.011065			0.887774							-0.07402			0.118174
																					0.447437			0.914125							0.017619			0.016426							-0.0661			0.373018
																					0.449613			0.96133							0.020272			0.302632							-0.06507			0.142799
																					0.462385			0.777871							0.025067			0.125453							-0.06066			0.3425
																					0.467772			0.672881							0.029442			0.051868							-0.05729			0.01141
																					0.472853			1.16596							0.05023			0.268228							-0.05177			0.48104
																					0.474925			0.591128							0.051003			0.313955							-0.03805			0.396006
																					0.493094			0.914125							0.054227			0.057415							-0.03418			0.205884
																					0.519369			0.21126							0.05542			0.204287							-0.02734			0.48104
																					0.533716			0.688783							0.058886			0.126764							-0.02512			0.063079
																					0.571972			1.13663							0.06054			0.249882							-0.02328			0.766537
																					0.591248			1.20322							0.061327			0.422273							-0.01675			0.085547
																					0.631502			1.28272							0.072075			0.422273							-0.01637			0.046632
																					0.670443			0.363729							0.09065			0.753216							-0.01616			0.040788
																					0.735898			1.16249							0.094217			0.736169							-0.01586			0.184938
																					0.751871			0.688783							0.099801			0.027839							-0.01346			0.35195
																					0.772257			0.733595							0.112542			0.175858							-0.01272			0.144133
																					0.777391			1.0253							0.112857			0.981887							-0.00898			0.162482
																					0.825181			0.599104							0.125413			0.232234							0.022429			0.404866
																															0.127027			0.393939							0.024951			0.079707
																															0.132112			0.051868							0.025965			0.049232
																															0.133557			1.01397							0.029632			0.243402
																															0.134897			0.15357							0.033968			0.01879
																															0.146187			0.452426							0.03446			0.01879
																															0.147529			0.0108							0.041398			0.337876
																															0.14784			1.17314							0.044039			0.01879
																															0.157384			0.249142							0.047155			0.232378
																															0.157939			0.56752							0.048395			0.446921
																															0.162058			0.302632							0.057522			0.120975
																															0.170582			1.0337							0.0614			1.12686
																															0.172044			0.112573							0.065519			0.05693
																															0.178286			0.808648							0.070451			0.238431
																															0.182934			1.05572							0.071288			0.265417
																															0.183402			0.566287							0.075681			0.221617
																															0.193419			0.275312							0.077638			0.735955
																															0.20319			0.178288							0.082061			0.408126
																															0.206098			0.736169							0.084466			0.574956
																															0.206508			1.10047							0.084771			0.870966
																															0.207865			0.064422							0.085341			1.05384
																															0.209791			1.19452							0.097078			0.255274
																															0.211658			0.454803							0.100473			0.494094
																															0.222363			0.571429							0.104563			0.447984
																															0.247215			0.320125							0.108503			0.166971
																															0.25348			0.560944							0.109333			0.070079
																															0.260888			1.26788							0.109953			0.160256
																															0.267684			1.26576							0.114253			0.627411
																															0.275326			0.815112							0.11468			0.102327
																															0.281018			1.25158							0.120968			0.121452
																															0.284407			0.226453							0.122742			0.475128
																															0.291248			0.020631							0.123381			0.338597
																															0.291544			0.292079							0.127078			0.204341
																															0.292072			0.85763							0.127849			1.27292
																															0.303495			0.762605							0.128247			1.1445
																															0.305387			0.507564							0.131901			0.30966
																															0.307188			0.663863							0.132288			0.277666
																															0.317212			0.227147							0.133301			0.892857
																															0.320054			1.04656							0.137489			0.76212
																															0.320067			0.051868							0.137765			0.337876
																															0.325093			0.610584							0.137945			0.514794
																															0.331178			0.422273							0.138469			0.996417
																															0.332434			1.20431							0.140013			0.008001
																															0.334533			0.762593							0.140959			0.340546
																															0.335042			0.207511							0.142098			0.062047
																															0.341888			0.629081							0.143655			0.765061
																															0.342395			0.56752							0.148899			0.330688
																															0.342792			0.320125							0.151838			0.534651
																															0.355485			1.16918							0.152379			0.590401
																															0.370271			1.06314							0.153923			0.836997
																															0.377845			1.13254							0.154899			0.046931
																															0.382121			0.643484							0.155886			0.634041
																															0.383751			1.0337							0.15722			0.595557
																															0.384003			1.2677							0.160793			0.847739
																															0.387413			1.08729							0.16401			0.48104
																															0.401862			0.990911							0.167212			0.658585
																															0.418059			1.23768							0.172187			0.255274
																															0.438967			1.08531							0.185925			0.300407
																															0.442545			0.544705							0.187269			0.725894
																															0.46871			0.029434							0.194242			0.547085
																															0.47494			1.15149							0.198411			0.920006
																															0.481383			0.967858							0.198412			0.35195
																															0.507054			0.783106							0.198444			0.243402
																															0.508104			1.16903							0.204433			0.140145
																															0.510233			0.831343							0.206417			1.07453
																															0.515573			0.158203							0.207451			0.600789
																															0.516474			1.11173							0.207975			0.658585
																															0.517107			0.642052							0.212078			0.563392
																															0.585148			0.56752							0.215894			0.725889
																															0.603388			0.313955							0.220398			0.329978
																															0.643815			0.040857							0.227213			1.18407
																															0.680921			0.989016							0.227301			0.185551
																															0.826784			1.17329							0.227727			0.924845
																															0.839856			0.566287							0.230427			1.15166
																															1.03058			1.08331							0.23417			0.559599
																															1.32454			0.180733							0.234933			1.19344
																															1.36078			1.11188							0.235698			1.10415
																															1.66327			1.15181							0.24151			1.15904
																																									0.250873			1.07453
																																									0.253519			1.15176
																																									0.255942			0.105783
																																									0.256218			0.140145
																																									0.256425			0.627411
																																									0.26833			0.372076
																																									0.268737			0.824729
																																									0.271007			0.098155
																																									0.274592			1.00825
																																									0.278549			0.300407
																																									0.285658			0.310503
																																									0.29025			0.01466
																																									0.293201			0.99989
																																									0.295698			0.730198
																																									0.298905			0.91512
																																									0.303369			0.059642
																																									0.308532			1.18597
																																									0.312387			1.02331
																																									0.316727			0.975016
																																									0.317263			0.437816
																																									0.324724			1.24687
																																									0.327001			1.23204
																																									0.327162			1.05036
																																									0.333615			0.298925
																																									0.33403			0.023229
																																									0.338298			0.91518
																																									0.343791			1.21176
																																									0.353836			0.008797
																																									0.368392			0.277666
																																									0.368651			1.25802
																																									0.376307			1.24312
																																									0.394369			1.23196
																																									0.399978			1.06591
																																									0.428844			0.110793
																																									0.437413			0.057256
																																									0.439463			1.02841
																																									0.444985			0.166396
																																									0.452585			0.870915
																																									0.47727			0.669575
																																									0.492553			1.18597
																																									0.501183			0.999804
																																									0.511708			0.574956
																																									0.525279			0.756266
																																									0.528059			1.18616
																																									0.542416			1.15894
																																									0.547819			1.10232
																																									0.559857			0.360251
																																									0.593341			0.080089
																																									0.63335			1.05393
																																									0.689422			0.701731
																																									0.718856			0.892857
																																									0.885306			0.052539
																																									1.11228			1.08156

## Sheet: Fig.4
	HR	-Log(P-Value)		Years	III/IV	I/II		Years	G3	G2/G1		Years	High	Low		Years	High	Low		Years	III/IV	I/II		Years	G3	G2/G1		Years	High	Low		Years	High	Low			TCGA-EK-A3GM-01	TCGA-ZJ-AAXB-01	TCGA-ZJ-AAXJ-01	TCGA-ZJ-AAXI-01	TCGA-ZJ-A8QO-01	TCGA-ZJ-AAXF-01	TCGA-ZJ-AB0H-01	TCGA-LP-A4AV-01	TCGA-ZJ-AAXN-01	TCGA-ZJ-AB0I-01	TCGA-ZJ-AAXD-01	TCGA-ZJ-AAX8-01	TCGA-ZJ-AAXT-01
OS_lincRNAs_a_aFC	0.573522	1.44644		1.22466	0			0.024658	0			4.87123	0			4.87123	0			7.92603	0			7.92603	0			4.87123	0			4.87123	0			High	1	1	-1	-1	-1
OS_antisense_a_aFC	0.63695	1.24022		0.024658	0			1.24931	1			3.71781	0			6.83014	0			1.01918	0			1.01918	0			3.71781	0			2.13151	1			Low						-1	-1	-1	-1	-1	-1	-1	-1
DSS_lincRNAs_a_aFC	0.637672	0.912344		6.83014	0			1.13425	1			3.98904	0			2.13151	1			1.08767	0			1.08767	0			3.98904	0			3.98904	0
DSS_antisense_a_aFC	1.49413	0.734382		0.158904	1			0.728767	1			3.68493	0			2.76986	0			1.16712	0			1.16712	0			3.68493	0			3.68493	0				Keys	TCGA-LP-A5U2-01	TCGA-EA-A97N-01	TCGA-LP-A5U3-01	TCGA-DS-A0VL-01	TCGA-C5-A1BF-01	TCGA-C5-A1MP-01	TCGA-C5-A1MH-01	TCGA-UC-A7PD-01	TCGA-DS-A7WI-01	TCGA-EX-A1H6-01	TCGA-JW-A852-01	TCGA-EX-A69M-01
DFS_lincRNAs_a_aFC	6.71856	2.5679		1.94795	1			7.92603	0			6.83014	0			3.98904	0			2	0			2	0			0.660274	0			8.07945	0			High	1				-1	-1	-1	-1	-1	1	-1	-1
DFS_antisense_a_aFC	3.09661	2.63156		1.24931	1			1.01918	0			2.76986	0			0.158904	1			6.83836	0			6.83836	0			2.13151	1			3.71781	0			Low		-1	-1	-1									-1
RFS_lincRNAs_a_aFC	2.08397	2.00442		1.12877	1			1.08767	0			3.13151	1			1.22466	0			1.24384	0			1.24384	0			4.81096	0			1.3452	0
RFS_antisense_a_aFC	1.95266	2.13583		2.27123	0			1.16712	0			0.660274	0			3.68493	0			0.487671	1			0.487671	1			8.07945	0			1.69589	0				TCGA-EK-A3GM-01	TCGA-ZJ-AAXB-01	TCGA-ZJ-AAXI-01	TCGA-ZJ-AAXJ-01	TCGA-ZJ-A8QO-01	TCGA-ZJ-AAXF-01	TCGA-ZJ-AAX8-01	TCGA-ZJ-AAXT-01	TCGA-ZJ-AB0I-01	TCGA-ZJ-AB0H-01	TCGA-ZJ-AAXD-01	TCGA-ZJ-AAXN-01	TCGA-LP-A4AV-01
				2.60548	1			2	0			2.13151	1			8.07945	0			1.91507	0			1.91507	0			2.06849	0			0.660274	0			High	1	1
				0.257534	1			10.926	0			4.81096	0			3.71781	0			0.879452	0			0.879452	0			1.3452	0			1.16712	0			Low			-1	-1	-1	-1	-1	-1	-1	-1	-1	-1	-1
				1.13425	1			0.073973	0			8.07945	0			1.3452	0			0.024658	0			0.024658	0			1.34247	0			1.32329	0
				2.27123	1			0.920548	1			2.06849	0			3.13151	1			0.947945	0			0.947945	0			1.30137	1			3.01096	0				TCGA-LP-A5U2-01	TCGA-EA-A97N-01	TCGA-LP-A5U3-01	TCGA-DS-A0VL-01	TCGA-C5-A1BF-01	TCGA-C5-A1MP-01	TCGA-C5-A1MH-01	TCGA-UC-A7PD-01	TCGA-DS-A7WI-01	TCGA-EX-A1H6-01	TCGA-JW-A852-01	TCGA-EX-A69M-01	TCGA-MA-AA42-01
				0.284932	1			6.83836	0			1.3452	0			1.35343	1			4.90685	0			4.20548	0			2.36438	0			1.29863	0			High									-1	1
				3.90959	0			1.24384	0			1.34247	0			1.69589	0			3.87671	0			5.06027	0			1.32329	0			4.81096	0			Low	1	-1	-1	-1	-1	-1	-1	-1			-1	-1	-1
				11.1945	0			0.487671	1			1.35343	1			3.31507	1			2.70137	0			4.27671	0			3.01096	0			1.53699	1
				0.720548	1			0.939726	0			1.22466	0			0.660274	0			7.92603	1			1.52877	1			1.29863	0			1.55343	0
				0.569863	1			0.20274	1			1.66301	1			0	0			3.04657	0			5.45753	0			1.16712	0			2.36438	0
				0.728767	1			1.91507	0			0.158904	1			1.16712	0			4.69589	0			1.69589	0			0.964384	1			1.84932	1
				1.30685	1			4.12329	0			1.30137	1			1.32329	0			1.69041	0			0.865753	1			1.84932	1			0.964384	1
				0.273973	1			0.879452	0			2.36438	0			3.01096	0			2.17808	0			2.49589	0			1.69589	0			1.30137	1
				7.92603	0			0.024658	0			1.32329	0			1.29863	0			3.41096	0			0.709589	0			1.53699	1			1.52055	1
				1.01918	0			0.947945	0			3.01096	0			4.81096	0			2.02466	0			1.73151	0			7.92603	0			1.34247	0
				1.60548	0			3.3452	0			1.29863	0			0.273973	1			17.4657	0			3.02192	0			6.83836	0			1.11233	0
				1.08767	0			1.66301	1			1.16712	0			1.53699	1			3.7589		0		0.865753	1			1.52055	1			5.6	0
				1.16712	0			0.246575	0			0.964384	1			0.142466	1			1.21644		0		1.9863	0			3.20274	0			11.4301	0
				4.90685	0			0.731507	1			0.136986	0			1.55343	0			1.99726		0		1.26849	0			5.6	0			12.2822	0
				2	0			4.20548	0			0	0			2.36438	0			5.63288		0		0.964384	1			1.20548	1			1.20548	1
				3.87671	0			5.06027	0			1.84932	1			0	0			4.20548		0		2.28493	0			11.4301	0			6.83836	0
				1.29041	1			4.27671	0			1.69589	0			0.920548	1			5.06027		0		1.43562	0			1.08493	1			1.08493	1
				10.926	0			1.52877	1			0.227397	0			1.84932	1			4.27671		0		1.11233	0			1.2411	0			3.20274	0
				0.073973	0			5.45753	0			1.53699	1			0.038356	0			1.52877		1		1.70685	0			12.2822	0			2.23288	0
				1.01096	0			1.69589	0			0	0			0.964384	1			5.45753		0		0.693151	0			0.868493	1			0.865753	1
				2.70137	0			0.865753	1			7.92603	0			1.30137	1			1.69589		0		1.5726	1			1.69589	0			1.46027	0
				0.920548	1			0.049315	0			6.83836	0			1.66301	1			0.865753		1		0.29863	0			2.23288	0			0.868493	1
				0.035616	0			2.49589	0			1.52055	1			1.52055	1			2.49589		0		9.43014	0			2.95343	0			0.865753	1
				0.778082	0			0.709589	0			3.20274	0			0.136986	0			0.709589		0		1.48493	0			1.55343	0			1.69589	0
				7.92603	1			0	0			5.6	0			0.227397	0			3.98904		0		3.71781	0			1.3452	0			1.51233	0
				0.093151	0			3.4137	0			1.20548	1			1.34247	0			0.690411		0		4.03288	0			3.07397	0			4.62466	0
				0	0			1.73151	0			0.038356	0			1.11233	0			3.40548		0		1.08493	1			1.01918	0			2.06849	0
				6.83836	0			3.02192	0			0.073973	0			5.6	0			4.33425		0		10.6137	0			0.865753	1			1.01918	0
				1.6548	0			0.865753	1			0.273973	1			11.4301	0			4.17808		0		4.62466	0			1.11233	0			2.20548	1
				1.24384	0			1.9863	0			11.4301	0			1.23288	1			4.93151		0		1.9726	0			4.03288	0			2.95343	0
				0.326027	0			1.26849	0			1.08493	1			12.2822	0			12.0137		0		1.47945	0			4.33425	0			1.3452	0
				0	0			0.964384	1			1.2411	0			0.246575	0			1.34247		0		12.2822	0			2.20548	1			3.07397	0
				3.04657	0			2.28493	0			12.2822	0			1.20548	1			2.78082		0		0.868493	1			1.16438	1			4.27671	0
				4.69589	0			1.43562	0			0.246575	0			0.073973	0			1.21096		0		1.16438	1			5.06027	0			0.564384	1
				0.487671	1			1.11233	0			3.31507	1			6.83836	0			1.73151		0		1.52055	1			2.28493	0			2.82466		0
				1.69041	0			0.057534	0			0.868493	1			1.08493	1			3.02192		0		1.74247	0			10.6137	0			1.9726		0
				0	0			1.70685	0			0.010959	0			0.093151	0			0.564384		1		1.2411	0			6.92055	0			4.03288		0
				1.0137	1			0.210959	1			1.69589	0			3.20274	0			2.2		0		11.4301	0			0.865753	1			7.92603		0
				0.835616	1			0.408219	0			2.23288	0			2.23288	0			1.3452		0		10.7808	0			1.51233	0			2.43836		0
				0.939726	0			1.74247	1			1.73425	1			0.865753	1			6.5589		0		1.0411	0			0.564384	1			0.024658		0
				0.20274	1			1.5726	1			2.95343	0			1.46027	0			0.865753		1		1.05479	1			4.27671	0			4.33425		0
				1.91507	0			0.690411	1			1.55343	0			0.868493	1			1.9863		0		1.64932	0			2.82466	0			12.2795		0
				2.17808	0			0.29863	0			0.073973	0			0.865753	1			1.26849		0		1.87671	0			2	0			0.693151		0
				0	0			0.123288	0			0.920548	1			1.69589	0			2.33973		0		1.48493	0			1.21644	0			1.2411		0
				4.12329	0			9.43014	0			1.23288	1			1.51233	0			1.84932		1		0.068493	0			2.70137	0			1.08767		0
				0.879452	0			0.69589	0			1.3452	0			1.73425	1			0.964384		1		2.92055	0			1.9726	0			5.63288		0
				0.024658	0			0.120548	0			3.07397	0			4.62466	0			2.28493		0		3.07397	0			0.024658	0			2.04657		0
				0.947945	0			2.18904	0			1.01918	0			0.035616	0			1.43562		0		1.63288	0			1.08767	0			7.31233		0
				3.41096	0			1.48493	0			0.865753	1			2.06849	0			2.82466		0		2.37808	1			2.37808	1			4.20548		0
				1.04931	0			0.169863	1			0.093151	0			1.01918	0			3.7452		0		7.31233	0			5.63288	0			10.6137		0
				2.02466	0			0	0			1.11233	0			0.041096	0			1.11233		0		1.30137	1			12.2795	0			1.64932		0
				3.3452	0			0.145205	0			4.03288	0			2.20548	1			3.11233		0		6.09863	0			2.92055	0			2.49589		0
				17.4657	0			0.454795	1			0.408219	0			0.257534	1			2.77534		0		6.12055	0			4.62466	0			5.06027		0
				1.66301		1		3.71781	0			0	0			2.95343		0		2.57534		0		4.75343	0			1.64932	0			1.48493		0
				3.98904		0		0.553425	0			4.56712	0			3.4137		0		2.36438		0		1.32055	0			1.12329	0			1.52055		0
				0.419178		1		0.010959	0			0.041096	0			1.3452		0		1.63014		0		4.90685		0		4.46575	0			1.89863		1
				0.246575		0		4.03288	0			0.032877	0			0.69589		0		1.1726		0		3.87671		0		2.04657	0			3.79726		0
				0		0		1.08493	1			4.33425	0			3.07397		0		1.70685		0		2.70137		0		6.5589	0			1.9863		0
				0.731507		1		10.6137	0			3.4137	0			0.073973		0		0.693151		0		7.92603		1		1.9863	0			2.28493		0
				1.35343		1		4.62466	0			2.20548	1			4.27671		0		1.5726		1		3.04657		0		2.49589	0			3.87671		0
				3.40548		0		7.91233	0			1.16438	1			4.56712		0		0.29863		0		4.69589		0		1.70685	0			2.51781		0
				0		0		1.9726	0			1.2274	0			0.126027		0		9.43014		0		1.69041		0		1.89863	1			6.92055		0
				2.26027		0		1.47945	0			5.06027	0			0.564384		1		1.48493		0		2.17808		0		2.02466	0			1.16438		1
				4.20548		0		12.2822	0			2.28493	0			1.2274		0		12.2795		0		3.41096		0		6.52877	0			2		0
				5.06027		0		0.353425	0			2.18904	0			2.82466		0		1.69589		0		2.02466		0		1.46027	0			0.690411		0
				0.764384		0		0.008219	0			10.6137	0			0.123288		0		4.43014		0		17.4657		0		3.02192	0			1.73151		0
				4.27671		0		0.868493	1			0.690411	1			1.9726		0		2.06849		0		3.98904		0		1.52877	1			1.21644		0
				4.33425		0		1.16438	1			6.92055	0			17.5562		0		2.1589		0		0.690411		0		2.2	0			4.46575		0
				0		0		1.52055	1			0.142466	1			4.03288		0		2.6137		0		3.40548		0		3.40548	0			1.70685		0
				1.28493		1		1.74247	0			0.865753	1			0.553425		0		0.030137		0		4.33425		0		2.51781	0			3.03014		0
				1.3863		1		1.2411	0			0.572603	1			0.010959		0		2.95343		0		4.17808		0		1.73151	0			1.63014		0
				3.7589		0		11.4301	0			0.553425	0			7.92603		0		4.5863		1		4.93151		0		3.03014	0			1.52877		1
				0.142466		1		1.73425	1			1.51233	0			0.032877		0		1.70137		0		12.0137		0		0.947945	0			2.17808		0
				1.52877		1		10.7808	0			7.91233	0			2.43836		0		3.68493		0		1.34247		0		10.7808	0			1.5726		1
				5.45753		0		1.0411	0			0.564384	1			0.024658		0		1.29863		0		2.78082		0		6.09863	0			6.52877		0
				1.21644		0		1.05479	1			0.035616	0			0.117808		0		3.01096		0		0.564384		1		4.20548	0			14.7534		0
				1.21096		0		1.64932	0			4.27671	0			4.33425		0		3.79726		0		2.2		0		1.99726	0			10.7808		0
				4.56712		0		0.032877	0			2.82466	0			12.2795		0		3.71781		0		1.3452		0		1.3452	1			0.29863		0
				1.99726		0		0.041096	0			2	0			0.210959		1		4.03288		0		2.33973		0		3.87671	0			2.70137		0
				4.17808		0		1.87671	0			1.21644	0			1.2411		0		1.08493		1		2.82466		0		0.690411	0			3.40548		0
				4.93151		0		1.48493	0			2.70137	0			2.26027		0		10.6137		0		3.11233		0		2.16712	0			7.92603		1
				1.69589		0		0.068493	0			1.9726	0			1.08767		0		4.62466		0		2.77534		0		1.0411	0			3.86027		0
				0.005479		0		2.92055	0			0.126027	0			5.63288		0		1.9726		0		2.57534		0		2.6137	0			0.030137		0
				5.63288		0		3.07397	0			0.024658	0			0.690411		1		1.47945		0		12.2795		0		3.29589	0			2.92055		0
				1.74247		0		0.073973	0			1.08767	0			0.745205		1		12.2822		0		1.69589		0		0.693151	0			1.21096		0
				0.013699		0		1.03836	1			2.37808	1			2.04657		0		0.868493		1		4.43014		0		1.05479	1			3.11233		0
				0.865753		1		0.136986	0			0.123288	0			0.024658		0		1.16438		1		2.06849		0		1.87671	0			2.37808		1
				0.049315		0		1.63288	0			0.69589	0			7.31233		0		1.52055		1		2.1589		0		0.487671	1			4.93151		0
				12.8603		0		2.37808	1			5.63288	0			4.20548		0		1.74247		0		2.6137		0		4.90685	0			6.5589		0
				2.49589		0		0.745205	1			1.60548	0			10.6137		0		1.2411		0		0.030137		0		6.12055	0			1.05479		1
				0.394521		1		7.31233	0			12.2795	0			1.64932		0		11.4301		0		2.95343		0		1.48493	0			3.40548		0
				12.0137		0		1.30137	1			2.92055	0			2.49589		0		10.7808		0		4.5863		1		1.5726	1			1.87671		0
				0.709589		0		0.572603	1			0.353425	0			5.06027		0		1.0411		0		1.70137		0		1.32055	0			2.6137		0
				1.34247		0		6.09863	0			4.62466	0			4.24932		0		1.05479		1		4.87123		0		14.7534	0			0.947945		0
				0		0		1.43288	0			17.5562	0			1.48493		0		1.64932		0		1.51233		0		12.0137	0			0.553425		1
				2.78082		0		6.12055	0			1.64932	0			0		0		1.87671		0		8.07945		0		0.29863	0			2.2		0
				0.564384		1		4.75343	0			1.12329	0			1.52055		0		1.48493		0		2.51781		0		5.45753	0			3.29589		0
				3.4137		0		1.32055	0			4.46575	0			1.89863		1		0.068493		0		6.52877		0		0.553425	1			1.5863		0
				2.2		0		0.035616	0			2.04657	0			0.408219		0		2.92055		0		6.92055		0		0.254795	1			2.08493		0
				1.3452		0		0.126027	0			6.5589	0			0.394521		1		4.87123		0		1.29863		0		7.92603	1			1.43562		0
				1.73151		0		1.36712	0			1.9863	0			1.24931		1		1.51233		0		2.43836		0		0.709589		0		12.9808		0
				1.73699		0		2.16712	0			2.49589	0			3.79726		0		8.07945		0		3.03014		0		2.6137		0		3.7452		0
				3.02192		0		8.32603	0			1.70685	0			1.03836		1		2.51781		0		2.23288		0		7.31233		0		6.09863		0
				0.865753		1		6.83014		0		0	0			2.27123		1		6.52877		0		5.6		0		2.43836		0		2.3589		0
				1.9863		0		0.158904		1		1.89863	1			0.035616		0		6.92055		0		1.3452		0		4.93151		0		3.02192		0
				1.26849		0		1.12877		1		2.02466	0			1.9863		0		1.29863		0		12.9808		0		12.9808		0		2.33973		0
				6.5589		0		2.27123		0		0.745205	1			0.120548		0		2.43836		0		2.27397		0		2.78082		0		1.74247		0
				2.33973		0		0.257534		1		6.52877	0			1.28493		1		3.03014		0		1.52055		0		1.5863		0		4.17808		0
				0.964384		1		2.27123		1		1.46027	0			2.28493		0		2.23288		0		1.12329		0		1.91507		0		2.6274		0
				1.84932		1		11.1945		0		0.035616	0			3.87671		0		5.6		0		2.16712		0		1.74247		0		1.0411		0
				0		0		0.720548		1		0.120548	0			0		0		1.3452		0		4.46575		0		1.63288		0		2.1589		0
				2.28493		0		0.569863		1		3.81918	0			2.51781		0		12.9808		0		2.04657		0		1.52055		0		0.254795		1
				2.82466		0		0.273973		1		1.3863	1			6.92055		0		2.27397		0		1.20548		1		3.40548		0		1.3452		1
				1.43562		0		1.60548		0		1.33699	1			0.353425		0		1.52055		0		2.20548		1		1.40274		0		1.32055		0
				8.48493		0		4.90685		0		0.024658	0			1.16438		1		1.12329		0		1.46027		0		1.43562		0		5.33151		0
				3.7452		0		3.87671		0		0.013699	0			0.939726		0		2.16712		0		3.20274		0		2.33973		0		0.487671		1
				0.156164		0		1.29041		1		4.24932	0			1.59452		0		4.46575		0		1.66301		0		3.86027		0		0.221918		0
				1.11233		0		1.01096		0		1.94795	1			1.60548		0		2.04657		0		5.33151		0		2.3589		0		2.6137		0
				0.057534		0		2.70137		0		3.02192	0			2		0		1.20548		1		1.5863		0		1.03014		0		2.02466		0
				3.11233		0		0.778082		0		1.28493	1			13.3671		0		2.20548		1		1.40274		0		3.79726		0		1.99726		0
				2.77534		0		7.92603		1		1.52877	1			0.419178		1		1.46027		0		3.29589		0		2.17808		0		12.0137		0
				2.57534		0		0.093151		0		0.835616	1			0.008219		0		3.20274		0		3.86027		0		2.6274		0		4.5863		1
				3.68493		0		0		0		2.2	0			1.73151		0		1.66301		0		1.53699		1		3.7452		0		1.47945		0
				12.2795		0		1.6548		0		3.40548	0			1.21644		0		5.33151		0		1.89863		1		1.70137		0		3.7589		0
				1.69589		0		0.326027		0		1.03836	1			4.46575		0		1.5863		0		0.553425		1		4.43014		0		1.70137		0
				4.43014		0		0		0		2.51781	0			1.70685		0		1.40274		0		1.3452		1		0.221918		0		4.90685		0
				1.70685		0		3.04657		0		1.73151	0			3.03014		0		3.29589		0		1.03014		0		1.7863		1		2.27397		0
				2.36438		0		4.69589		0		3.03014	0			0.057534		0		4.81096		0		9.88767		0		4.5863		1		2.78082		0
				1.2274		0		1.69041		0		0.947945	0			1.29041		1		0.660274		0		2.08493		0		9.43014		0		1.7863		1
				2.76986		0		2.17808		0		10.7808	0			1.63014		0		1.32329		0		3.40548		0		2.1589		0		2.77534		0
				0.210959		1		0		0		1.36712	0			1.52877		1		2.13151		1		14.4411		0		1.63014		0		17.4657		0
				1.29863		0		3.41096		0		6.09863	0			2.17808		0		2.3589		0		14.7534		0		3.41096		0		2.57534		0
				0.408219		0		1.04931		0		4.20548	0			1.5726		1		3.07397		0		6.90411		0		5.33151		0		14.4411		0
				2.06849		0		2.02466		0		3.3452	0			12.2384		0		1.63288		0		1.7863		1		1.21096		0		1.24384		0
				1.74247		1		17.4657		0		0.257534	1			6.52877		0		2.37808		1		0.221918		0		1.26849		0		6.90411		0
				1.5726		1		3.98904		0		1.29041	1			14.7534		0		7.31233		0		1.32877		0		2.57534		0		1.12329		0
				2.1589		0		0.419178		1		12.2384	0			10.7808		0		1.30137		1		1.21096		0		2.27397		0		1.1726		0
				2.6137		0		1.35343		1		0.778082	0			0.29863		0		6.09863		0		3.7452		0		2.08493		0		1.03014		0
				0.690411		1		3.40548		0		0.753425	1			2.70137		0		6.12055		0		3.68493		0		4.69589		0		5.45753		0
				0.29863		0		0		0		1.99726	0			3.40548		0		4.75343		0		1.29863		0		14.4411		0		9.43014		0
				0.123288		0		2.26027		0		1.24931	1			0		0		1.32055		0		4.81096		0		17.4657		0		1.29863		0
				9.43014		0		0.764384		0		0.720548	1			8.32603		0		3.86027		0		0.660274		0		1.29863		0		3.04657		0
				0.69589		0		4.33425		0		2.26027	0			7.92603		1		1.53699		1		1.32329		0		0.030137		0		1.63288		0
				0.120548		0		1.28493		1		1.3452	1			1.72603		1		1.89863		1		2.13151		1		3.7589		0		2.16712		0
				2.18904		0		1.3863		1		3.87671	0			3.86027		0		0.553425		1		2.3589		0		3.11233		0		0.709589		0
				2.11781		1		4.17808		0		0.419178	1			0.030137		0		1.3452		1		2.6274		0		3.04657		0		4.69589		0
				0.030137		0		4.93151		0		0	0			2.92055		0		1.03014		0		0.254795		1		1.47945		0		1.66301		0
				2.95343		0		1.74247		0		8.32603	0			2.60548		1		9.88767		0		2.6137		0		1.1726		0		0.879452		0
				1.63014		0		0.013699		0		1.74247	1			1.21096		0		2.08493		0						4.17808		0		4.75343		0
				1.48493		0		12.8603		0		2.16712	0			0.013699		0		3.40548		0						0.068493		0		0.068493		0
				1.23288		1		12.0137		0		1.0411	0			1.43288		0		14.4411		0						4.75343		0		3.41096		0
				0		0		1.34247		0		2.6137	0			3.11233		0		14.7534		0						9.88767		0		1.26849		0
				0.169863		1		2.78082		0		3.29589	0			2.37808		1		6.90411		0						1.24384		0		1.48493		0
				4.5863		1		0.564384		1		0.210959	1			4.93151		0		1.7863		1						6.90411		0		1.40274		0
				0		0		2.2		0		1.74795	0			6.5589		0		0.221918		0						1.66301		0		1.69041		0
				0.145205		0		1.3452		0		1.6548	0			1.05479		1		2.6274		0						1.48493		0		1.91507		0
				0.454795		1		2.33973		0		0.394521	1			1.6548		0		0.254795		1						2.77534		0		9.88767		0
				1.1726		0		0		0		1.72603	1			1.74795		0		2.6137		0						0.879452		0		4.43014		0
				1.70137		0		2.82466		0		0.939726	0			1.94795		1		1.55343		0						1.32877		0		6.12055		0
				4.81096		0		8.48493		0		1.01096	0			11.1945		0										1.69041		0		1.32877		0
				4.87123		0		0.156164		0		1.05479	1			3.40548		0
				0.227397		0		3.11233		0		0.008219	0			1.87671		0
				3.71781		0		2.77534		0		0.764384	0			2.6137		0
				0.553425		0		2.57534		0		1.87671	0			0.947945		0
				1.51233		0		12.2795		0		0.487671	1			2.18904		0
				8.07945		0		1.69589		0		4.90685	0			0.553425		1
				0.010959		0		4.43014		0		2.11781	1			2.27123		0
				2.51781		0		1.2274		0		1.13425	1			0.835616		1
				0.660274		0		2.76986		0		0.326027	0			1.3863		1
				6.52877		0		2.06849		0		6.12055	0			2.2		0
				4.03288		0		2.1589		0		1.48493	0			3.29589		0
				6.92055		0		2.6137		0		0.073973	0			2.11781		1
				1.29863		0		2.11781		1		1.5726	1			0.073973		0
				1.08493		1		0.030137		0		0.117808	0			1.5863		0
				3.01096		0		2.95343		0		1.32055	0			10.926		0
				10.6137		0		1.23288		1		3.90959	0			2.08493		0
				4.62466		0		4.5863		1		14.7534	0			0		0
				7.91233		0		1.70137		0		12.0137	0			1.43562		0
				1.9726		0		4.87123		0		0.29863	0			12.9808		0
				2.43836		0		0.227397		0		5.45753	0			3.7452		0
				3.03014		0		1.51233		0		0.553425	1			6.09863		0
				3.31507		1		8.07945		0		0.254795	1			0.572603		1
				0.194521		0		2.51781		0		7.92603	1			2.3589		0
				1.47945		0		6.52877		0		0.709589		0		1.46301		0
				2.23288		0		6.92055		0		2.6137		0		0.720548		1
				12.2822		0		1.29863		0		7.31233		0		1.74247		1
				5.6		0		2.43836		0		2.43836		0		0.778082		0
				1.3452		0		3.03014		0		4.93151		0		3.02192		0
				0.353425		0		3.31507		1		12.9808		0		0.326027		0
				1.9589		1		0.194521		0		2.78082		0		0		0
				0.008219		0		2.23288		0		1.5863		0		2.33973		0
				0.868493		1		5.6		0		1.91507		0		0.731507		1
				1.16438		1		1.3452		0		11.1945		0		1.74247		0
				1.52055		1		1.9589		1		1.59452		0		1.33699		1
				4.24932		0		4.24932		0		2.27123		1		0.284932		1
				1.32329		0		12.9808		0		1.74247		0		4.17808		0
				12.9808		0		0.117808		0		1.63288		0		2.6274		0
				0.117808		0		7.83288		0		1.52055		0		1.74247		0
				7.83288		0		2.27397		0		0.284932		1		0		0
				2.13151		1		1.52055		0		3.40548		0		1.0411		0
				1.74247		0		1.12329		0		1.40274		0		2.1589		0
				1.2411		0		2.16712		0		1.43562		0		0.254795		1
				2.27397		0		4.46575		0		2.33973		0		7.83288		0
				1.52055		0		2.04657		0		0.778082		0		8.48493		0
				1.12329		0		1.20548		1		3.86027		0		0		0
				2.16712		0		1.74795		0		2.3589		0		1.3452		1
				11.4301		0		2.20548		1		2.60548		1		1.32055		0
				3.81918		0		0.038356		0		1.03014		0		5.33151		0
				4.46575		0		1.46027		0		3.79726		0		0.487671		1
				2.04657		0		3.20274		0		2.16712		0		0.169863		1
				1.73425		1		1.66301		0		2.17808		0		0		0
				1.20548		1		5.33151		0		2.6274		0		0.221918		0
				1.74795		0		1.5863		0		3.7452		0		0.145205		0
				2.20548		1		1.40274		0		0.169863		1		0.778082		0
				0.038356		0		3.29589		0		0		0		2.6137		0
				10.7808		0		3.13151		1		1.12877		1		2.02466		0
				1.0411		0		1.33699		1		1.70137		0		1.99726		0
				1.05479		1		3.86027		0		0.049315		0		12.0137		0
				1.64932		0		1.53699		1		0.057534		0		0		0
				0.032877		0		1.89863		1		4.43014		0		3.81918		0
				0.041096		0		0		0		0.221918		0		4.5863		1
				2.3589		0		0.553425		1		1.7863		1		1.47945		0
				1.46027		0		17.5562		0		7.83288		0		3.7589		0
				3.20274		0		1.3452		1		1.74247		0		1.70137		0
				1.87671		0		13.3671		0		4.5863		1		4.90685		0
				1.66301		0		1.03014		0		9.43014		0		2.27397		0
				3.79726		0		9.88767		0		0.145205		0		0		0
				5.33151		0		2.08493		0		2.1589		0		0.20274		1
				1.5863		0		3.40548		0		1.63014		0		2.78082		0
				1.48493		0		14.4411		0		0.569863		1		1.7863		1
				0.068493		0		14.7534		0		3.41096		0		2.16712		0
				2.92055		0		6.90411		0		5.33151		0		2.77534		0
				1.40274		0		1.7863		1		1.21096		0		7.91233		0
				3.29589		0		0.221918		0		1.26849		0		1.13425		1
				3.13151		1		1.72603		1		0		0		0.753425		1
				3.07397		0		1.32877		0		0.728767		1		17.4657		0
				1.33699		1		1.41918		0		2.27123		0		1.36712		0
				0.073973		0		1.22466		0		13.3671		0		2.57534		0
				3.86027		0		1.0137		1		2.57534		0		1.01096		0
				1.03836		1		1.21096		0		1.46301		0		14.4411		0
				0.136986		0		4.56712		0		0.731507		1		0.764384		0
				1.63288		0		0.005479		0		2.27397		0		1.24384		0
				1.53699		1		1.73699		0		2.08493		0		6.90411		0
				1.89863		1		3.7452		0		4.69589		0		1.12329		0
				0		0		3.68493		0		0		0		0.454795		1
				2.37808		1		1.29863		0		14.4411		0		1.1726		0
				0.553425		1		4.81096		0		17.4657		0		1.03014		0
				17.5562		0		0.660274		0		8.48493		0		5.45753		0
				1.3452		1		1.32329		0		0.156164		0		9.43014		0
				13.3671		0		2.13151		1		0.454795		1		3.3452		0
				0.745205		1		2.3589		0		1.04931		0		1.12877		1
				1.03014		0		2.6274		0		1.43288		0		0.005479		0
				2.6274		0		0.254795		1		0.20274		1		1.9589		1
				7.31233		0		2.6137		0		0		0		0.049315		0
				9.88767		0		0.073973		0		1.29863		0		1.29863		0
				2.08493		0		0.035616		0		10.926		0		3.04657		0
				0.254795		1		0		0		0.030137		0		12.8603		0
				3.40548		0		0		0		0		0		1.0137		1
				14.4411		0		0		0		12.8603		0		1.63288		0
				12.2384		0		0		0		0.005479		0		2.16712		0
				1.30137		1		3.81918		0		1.9589		1		0.709589		0
				14.7534		0		12.2384		0		3.7589		0		4.69589		0
				0.572603		1		0		0		0		0		1.66301		0
				6.09863		0						3.11233		0		0.728767		1
				1.43288		0						3.04657		0		0.879452		0
				6.12055		0						1.47945		0		4.12329		0
				6.90411		0						1.1726		0		4.75343		0
				4.75343		0						4.17808		0		0.068493		0
				1.7863		1						0.068493		0		3.41096		0
				2.6137		0						1.73699		0		0.156164		0
				0.221918		0						4.12329		0		1.26849		0
				1.32055		0						0		0		3.90959		0
				0.035616		0						4.75343		0		1.30685		1
				1.72603		1						0		0		1.48493		0
				0.073973		0						9.88767		0		1.40274		0
				1.55343		0						1.24384		0		1.41918		0
				1.59452		0						6.90411		0		1.69041		0
				0.778082		0						1.66301		0		1.91507		0
				0.753425		1						1.48493		0		9.88767		0
				1.46301		0						2.77534		0		1.04931		0
				1.32877		0						1.0137		1		0.569863		1
				0.126027		0						0.879452		0		4.43014		0
				1.36712		0						1.30685		1		6.12055		0
				2.16712		0						1.41918		0		0.194521		0
				0		0						1.32877		0		1.73699		0
				8.32603		0						1.69041		0		0		0
				1.41918		0						0.194521		0		1.32877		0
[truncated: 249 more columns]

## Sheet: Fig.5
	ID	Description	setSize	enrichmentScore	NES	pvalue	p.adjust	qvalues	rank	leading_edge	core_enrichment
GO:0002713	GO:0002713	negative regulation of B cell mediated immunity	10	0.892997	1.66607	0.0012837	0.141561	0.133495	480	tags=30%, list=3%, signal=29%	722/725/2302
GO:0002228	GO:0002228	natural killer cell mediated immunity	63	-0.408975	-1.52945	0.0357143	0.423557	0.399424	3760	tags=43%, list=20%, signal=34%	1398/6845/201294/3002/1054/79465/10225/146850/114836/117157/10859/57823/84868/100528032/1130/56253/59067/3824/387836/80328/135250/10125/3952/6318/80329/154064
GO:0036037	GO:0036037	CD8-positive, alpha-beta T cell activation	14	-0.594434	-1.62821	0.0419162	0.445047	0.41969	2145	tags=36%, list=11%, signal=32%	944/3071/51043/5075
GO:0002715	GO:0002715	regulation of natural killer cell mediated immunity	40	-0.671733	-2.07209	0.00369004	0.106804	0.0953071	2640	tags=65%, list=14%, signal=56%	2995/3133/10666/8807/22914/146850/117157/100528032/57863/259197/9437/387837/114836/10225/4068/56253/84868/10125/3902/59067/10859/135250/353091/6318/3952
GO:0002456	GO:0002456	T cell mediated immunity	81	-0.531734	-1.8675	0.00480769	0.106804	0.0953071	3240	tags=46%, list=17%, signal=38%	3569/3593/7784/51571/3133/567/6556/8807/10892/3456/23180/383/259197/50943/3594/2625/6375/7454/3575/3383/114548/64005/5788/54440/182/925/2213/30009/10859/91543/3553/339390/5027/135250/133396/53833
GO:0036037	GO:0036037	CD8-positive, alpha-beta T cell activation	14	-0.703799	-1.74187	0.00554017	0.106804	0.0953071	2757	tags=71%, list=15%, signal=61%	3133/944/3659/8320/6375/2841/3071/10859/5075
GO:0002713	GO:0002713	negative regulation of B cell mediated immunity	10	0.789342	1.61728	0.00469484	0.106804	0.0953071	331	tags=30%, list=2%, signal=29%	722/725/2302
GO:0019724	GO:0019724	B cell mediated immunity	104	-0.362751	-1.3081	0.039548	0.287786	0.256809	2856	tags=38%, list=15%, signal=32%	5452/959/602/10538/1235/3586/3635/10666/3558/100423062/55061/733/732/710/3566/939/958/940/50943/6375/202309/7040/84174/715/695/2208/716/2213/4049/1401/30009/2207/730/712/4153/714/713/51311

## Sheet: Fig.6
	TCGA-EK-A2RN-01	TCGA-MA-AA3X-01	TCGA-Q1-A5R3-01	TCGA-C5-A901-01	TCGA-VS-A953-01	TCGA-FU-A5XV-01	TCGA-UC-A7PG-01	TCGA-EA-A3HU-01	TCGA-MA-AA3Y-01	TCGA-MU-A8JM-01	TCGA-C5-A1BM-01	TCGA-HM-A4S6-01	TCGA-DS-A0VN-01	TCGA-ZJ-AAXT-01	TCGA-BI-A0VS-01	TCGA-ZJ-AAX8-01	TCGA-BI-A0VR-01	TCGA-MY-A5BF-01	TCGA-LP-A5U3-01	TCGA-VS-A958-01	TCGA-Q1-A73O-01	TCGA-GH-A9DA-01	TCGA-C5-A1BI-01	TCGA-EA-A3HQ-01	TCGA-ZJ-AAXD-01	TCGA-VS-A9UI-01	TCGA-C5-A8YQ-01	TCGA-EK-A2RO-01	TCGA-C5-A7CH-01	TCGA-ZJ-AB0I-01	TCGA-EA-A97N-01	TCGA-C5-A7UH-01	TCGA-JW-A5VL-01	TCGA-ZJ-AAXN-01	TCGA-C5-A1MK-01	TCGA-C5-A7UC-01	TCGA-EK-A2GZ-01	TCGA-C5-A1BN-01	TCGA-EK-A2RE-01	TCGA-C5-A7CJ-01	TCGA-JX-A3Q0-01	TCGA-C5-A1BL-01	TCGA-LP-A4AV-01	TCGA-VS-A954-01	TCGA-EA-A3QE-01	TCGA-EA-A5ZD-01	TCGA-JW-A5VJ-01	TCGA-Q1-A6DW-01	TCGA-EA-A3HR-01
ENSG00000272905.1	-0.641656	-2.11073	0	-3.27651	-2.12574	-5.07639	-1.9475	-4.61701	-4.29451	-3.6449	-5.67997	-3.46368	-2.70545	-4.11719	-4.85008	-5.13008	-3.55775	-2.69617	-2.30884	-2.61428	-3.77602	-3.64994	-2.72407	-3.33449	-2.37605	-2.79052	-4.03047	-5.0404	-2.65105	-2.17535	-4.78319	-1.61188	-4.23229	-2.97116	-2.96989	-2.30155	-3.12028	-1.70687	-3.26491	-1.7075	-2.66256	-3.13863	-3.53612	-1.18672	-3.1837	-2.4532	-1.65673	-3.16158	-2.17249
ENSG00000258279.2	0.299105	-1.39237	-0.213028	2.09609	-3.76994	-0.550663	-2.4397	-1.45386	-1.76878	0.373858	-2.32417	0	-0.594764	-5.76139	-0.879571	-3.45236	-1.67839	0.937611	-1.95304	-5.25848	-1.54575	-0.593699	-1.83776	-2.56365	-2.02025	-2.69776	1.25606	1.63732	1.60199	0.210192	-1.25747	-2.39358	-0.352935	-1.61536	-4.35105	-2.58318	-2.02752	-0.848571	0.576313	-2.50371	-3.30676	-0.653552	-0.59536	-2.53136	0.156989	-1.22293	-2.88589	-0.133354	0.0901967
ENSG00000275223.1	-0.755803	-1.71031	-0.419939	-2.8057	1.35704	-2.02061	-0.772138	-3.40923	-5.40865	-3.75905	-1.15026	-1.70336	-2.64967	-1.9094	-1.87676	-1.54379	-2.08694	-3.54728	-3.23034	-2.4065	-3.47513	-3.34905	-3.68621	-0.252239	-2.4902	-3.48963	-0.0153366	-4.15455	-3.08713	-3.87446	-3.31238	-1.3781	-2.34644	-3.76337	-1.15804	0	-2.11896	-2.40598	-4.70099	-1.44314	-2.36167	-2.66782	-1.65027	-4.00131	-2.56088	-2.56735	-1.18591	-1.81629	-3.06425
ENSG00000274292.1	-4.19109	-4.88256	0	-4.24098	-5.09021	-2.71893	-2.83396	-3.88104	-5.25898	-2.14994	-3.25212	-1.36926	-4.66992	-3.17477	-2.95657	-2.00709	-4.52222	-5.39761	-3.38022	-2.25682	-3.62501	-3.02944	-3.3349	-2.97703	-0.64008	-3.17003	-1.01766	-4.68295	-3.47802	-4.40286	0.00722474	-1.42107	-2.80445	-3.18074	-2.3983	-3.90345	-3.86236	-4.44895	-3.85087	-1.43931	-2.81967	-2.78118	-4.91563	-4.85163	-1.71077	-2.41767	-1.34818	-1.95612	-2.81503
ENSG00000272970.1	-1.59574	-2.98765	0.831093	-2.34608	-2.70988	-0.101558	-2.01706	-3.10162	-3.36407	-1.84	-1.84264	-0.948287	-2.45309	-4.18675	-2.74972	0.259783	-1.235	-2.76574	-1.27887	-2.68385	-1.26062	0	-2.05667	-0.819093	-0.445615	-1.63769	-1.77811	-0.0655748	-0.0425479	-0.074995	-0.945868	-5.14087	-2.30186	-0.953259	-1.19146	-5.17847	1.59151	-1.55404	-1.56894	-2.29164	-2.50973	-1.2082	0.979276	-2.37177	-1.93134	-1.10773	-2.31126	-2.06122	0.47676
ENSG00000246465.1	-3.41918	-1.41877	-2.09188	-2.21532	-4.53332	-6.96939	-1.2825	-3.70266	-6.18751	-3.42243	-4.57297	-0.854185	-3.51099	-4.42522	-0.666266	-3.21573	-1.02449	-3.74118	-0.294947	-1.18535	-4.25399	0	-4.20203	0.0762902	-2.15357	-0.653775	-1.75355	-0.363549	-0.935246	-2.74643	-1.42827	-6.96431	-4.80337	-4.16372	-1.63023	-1.95751	-0.856782	-5.59987	-3.7794	-2.83497	-1.11815	-4.70971	-1.78527	1.62498	-4.66167	-4.12381	-4.32734	-0.469617	-4.65046
ENSG00000234917.2	-1.90421	-2.18064	-5.43871	-1.53907	-0.771626	-1.75398	-2.64301	-2.65717	-2.33467	-1.75546	-2.94252	-2.08881	-1.0294	-2.9647	-2.11263	-1.65567	-1.01295	-1.54369	-1.50428	-1.13987	-2.03858	-4.08242	-3.15655	-1.59704	-1.4866	-4.223	-2.55606	-0.0805645	-2.49857	0	-2.63071	-2.33386	-1.17292	-3.01132	-2.33198	-2.63449	-1.64587	-2.13935	-2.627	-0.970058	-2.51007	-0.986151	-0.13571	-0.0908235	-2.44626	-3.30072	-2.50425	-1.30866	-1.90453
ENSG00000263004.1	-1.12326	0.703115	1.52846	0.250053	0	0.776991	-0.519302	-1.2182	-0.402654	-1.77859	-0.0360418	1.29572	-0.506937	-1.47326	0.115772	0.396485	-0.269973	0.755107	0.335088	-1.163	-1.39513	-0.590976	0.632572	-0.849263	-0.509733	-0.0877036	0.420807	0.851449	0.860767	-0.116392	-0.0518057	-1.96795	0.0840541	-0.117778	-0.221627	-0.107424	-0.388898	0.522017	-0.299061	0.395852	0.203758	0.363271	1.29763	-0.0733142	1.48259	0.90954	0.972087	-0.125337	0.919892
ENSG00000245750.6	-5.30388	0	-5.34653	-5.76882	-7.52493	-5.15365	-4.60972	-6.10931	-5.37177	-6.30713	-6.17227	-2.12591	-6.19775	-6.19445	-5.60541	-6.20735	-5.05005	-4.5104	-6.19345	-5.69154	-5.43825	-5.31216	-7.97126	-5.99671	-5.03827	0	-4.10774	-6.11767	0	-5.83758	-4.0531	-6.14857	0	-5.46346	-5.04715	-6.18616	-6.19755	-5.78413	-6.6641	-5.1067	-7.32478	-4.89397	0	-5.96443	-5.84593	-4.30807	-4.99703	-7.23884	-4.37529
ENSG00000245017.2	-4.42637	0	-2.35799	-6.7982	-6.96935	-2.51061	-5.6391	-2.81677	-3.81619	-5.16659	-3.20165	-3.57033	-3.9052	-5.05391	-3.46487	-3.65176	-4.27208	-3.73243	-4.31595	-4.551	-3.88267	-3.75658	-5.09375	-3.9817	-3.89773	-3.57524	-3.7448	-4.24016	-6.49466	-2.69704	-1.98295	-5.59299	-4.75398	-2.84898	-5.22854	-5.63058	-3.32004	-5.81351	-6.10852	-3.38119	-3.18424	-3.66032	-3.25045	-3.23892	-1.70538	-3.55985	-3.59345	-5.0983	-3.27914
ENSG00000231742.4	-4.06208	0.0190369	-0.967226	-4.11198	-3.54617	-2.91185	-4.53785	-5.03744	-2.71493	-1.32837	-3.29304	-0.88411	-2.31852	-3.53761	-6.27051	-1.64362	-0.486327	0.176183	-2.21469	-1.03471	-3.19645	-1.74844	-2.50707	-0.252415	-3.38144	-0.625985	-4.4509	0	-0.586053	-0.322762	-1.39626	-1.40427	-2.84537	-0.391582	-0.805351	-0.721972	-5.12567	0.145722	-1.4223	-1.44986	-1.02409	-0.701079	0.687309	-3.72263	0	-1.87363	-2.85476	0.0327051	-3.17788
ENSG00000272791.1	-1.62427	-1.23328	-2.16942	-3.17667	0	-2.23958	-2.01758	-4.51717	-3.19466	-5.71499	-2.16508	-1.14145	-3.86864	-2.6023	-1.47722	-2.29327	-4.45791	-2.33329	-2.27938	-5.0994	-1.8461	-3.13506	-1.73526	-2.08264	-0.986698	-1.16016	-0.51559	-2.06609	-3.13617	-1.66047	-1.36142	-2.97146	-2.01697	-1.24682	-1.96958	-2.78666	-3.19037	-4.19199	-2.07196	-1.34462	-1.64518	-1.16432	-1.56181	-2.05035	-2.79435	-1.71593	-0.517357	-2.83934	-1.59872
ENSG00000276855.1	-2.6884	-0.716909	2.3336	-0.930945	-5.49442	-0.479278	-1.25728	0.1176	-1.25379	0.952203	-0.026274	-0.847466	-0.43027	1.7668	-0.611425	1.12695	-0.697611	1.02261	-1.99301	0.338971	1.83067	0.908177	0.344659	-2.05931	-0.422797	-2.1003	-1.61779	1.17964	-0.849805	-3.2221	0.124256	-2.53309	-3.69408	1.78945	1.62722	0.201904	1.50539	0.468775	0.723963	1.24575	-2.48691	-1.60042	2.07534	-0.933911	-1.49348	1.61553	0.033488	1.69856	1.41497
ENSG00000180861.8	-2.50624	3.24905	-3.11183	-0.0733578	-2.80325	3.07626	0.311904	0	-7.85953	2.36371	1.17707	0	0.811671	1.24852	-2.98884	-0.0584852	-0.0459653	-2.53873	1.22567	1.18263	-3.83855	0	1.53816	-1.96092	1.75936	-4.61858	-5.27357	0.449852	3.41473	-2.46736	0.856351	-3.31441	-2.43977	-4.21426	-1.87956	-0.696648	2.46782	1.17656	2.78108	-0.852993	-0.574144	0.940195	0	-4.45219	4.71104	-3.21088	3.07745	-0.377878	-4.00055
ENSG00000271755.1	-5.37186	-3.06333	-3.82954	-3.51486	-2.13348	-3.13416	-3.94073	-1.33598	-4.43974	-5.05318	-4.36577	-3.73445	-3.9438	-5.26242	-2.78586	-5.69036	-3.7961	-0.753947	-3.56099	-4.17456	-4.69887	-3.79517	-4.13234	-4.60526	-2.93632	-4.93576	-4.00579	-3.09818	-4.53326	-4.90555	-1.6805	-2.46166	-7.37753	-5.30904	-3.53016	-3.5537	-5.52856	-2.91351	-6.73208	-3.47423	-4.5854	-2.82444	-6.68136	-3.22505	-5.59197	-5.1834	-3.065	-3.39993	-2.17477
ENSG00000259915.2	-3.04193	-5.05533	-3.85397	-4.67679	-7.16988	-4.79859	-4.5177	-6.33922	0	-3.49264	-4.08024	-3.9635	-6.42765	-6.83939	-3.76493	-3.39285	-4.27996	-6.7403	-6.83839	-6.33649	-4.08319	-6.9571	-5.6162	-4.64166	-4.68322	0	-4.16771	-4.76261	-6.69519	-6.48252	-5.5054	-3.33408	-4.63257	-3.1698	-5.42906	-4.8311	-3.52056	-4.20668	-4.50169	-3.75164	-5.38476	-4.86084	-5.25832	-5.0244	-3.79043	-4.76037	-4.64197	-4.56185	-4.47966
ENSG00000273399.2	-1.06788	-3.66624	-0.754384	-3.4397	-3.61086	-2.82454	-2.54365	-3.36516	0	-4.97802	-2.42812	-3.7968	-3.86864	-4.86534	-3.01327	-2.55631	-3.30591	-3.18129	-2.86434	-4.36243	-5.10914	-4.98305	-1.47222	-5.6676	-2.70916	0	-3.19366	0	1.93708	-2.50847	0	-3.81946	-1.17309	-3.39738	-3.45501	-4.85705	0	0	-5.33499	-1.97023	-2.18832	-2.88679	-1.69931	-3.63532	-2.51682	-2.78632	-1.66792	-3.32477	-2.92064
ENSG00000238005.2	-0.00592794	-2.91463	0.280162	-3.27305	0	-2.93542	-3.85093	-4.61355	-5.02801	-3.96337	-4.99843	-6.36711	-3.32348	-4.85069	-3.70912	-2.44855	-3.87622	-6.33657	-4.8497	-4.34779	-4.09449	-2.4659	-4.04254	-4.65296	-2.69452	-3.69395	-5.34894	-3.03694	-2.96952	-4.07878	-4.10166	-2.58242	-4.55076	-2.43164	-2.52282	-1.17944	-3.11683	-5.6103	-6.90531	-3.17798	-5.56599	-3.64975	-2.39516	-3.8837	-3.6277	-2.26917	-4.9752	-4.15812	-3.906
ENSG00000259275.2	0	-4.58505	-5.58008	-5.09548	-6.8516	-4.06527	-5.78438	-4.79855	-4.96147	-8.21876	-5.34693	-5.23018	-4.30202	-5.10607	-4.31541	-3.53401	-4.29871	-5.42203	-5.78315	-5.60317	-4.64943	-6.63883	-3.128	-4.51602	-2.77998	0	-6.4344	-4.56986	-4.63994	-4.42728	-3.12822	-6.47523	-8.22118	-5.50061	-4.69574	-3.3429	-5.52421	-5.95879	-6.2538	-2.626	-5.23641	-4.9576	-7.52501	-4.55412	-3.9502	-4.32661	-5.42323	-6.15047	-2.99146
ENSG00000281357.1	-2.98859	-2.83206	0	-2.90098	-5.94661	-4.16029	-2.55747	-3.37898	-2.47152	-2.66991	-2.59394	-2.00326	-3.46742	-2.80877	-2.93398	-2.62902	-2.55419	-1.74445	-3.39274	-3.23875	-3.19696	-1.82695	-2.48604	-2.6458	-2.34447	-2.06707	-1.94445	-3.80238	-4.24953	-3.38479	-2.61917	-1.37385	-3.73123	-2.6975	-2.9834	-2.33482	-3.54122	-3.37573	-2.42281	-2.35845	-2.80786	-1.73068	-5.03506	-2.64914	-2.94568	-1.66263	-1.74063	-2.54504	-2.4838
ENSG00000238121.4	-3.33913	-3.24211	-2.73687	-3.761	-3.31918	-3.3264	-3.22994	0.302896	-1.77899	-2.15796	-3.08199	-0.879124	-0.842767	-3.10417	-1.56404	-0.881848	-1.23488	-1.36123	-2.55885	0.042592	-1.23249	-3.80684	-1.24677	-2.32147	-2.94799	-1.90303	-1.90198	-4.44242	-4.73757	-5.01033	-3.26767	-2.59886	-1.55631	-2.29517	-2.86376	-6.68085	-3.27719	-6.27881	-6.57382	-1.37256	-1.55268	-0.969112	-2.78614	-2.65175	0.163215	-2.05552	-2.52824	-2.4856	-2.68554
ENSG00000260646.1	-2.44919	-2.14066	-0.977261	-3.30644	-2.01816	-1.78438	-2.82542	-5.64694	-5.32443	-4.25979	-4.12493	-4.07857	-2.03493	-0.825181	-3.07265	-2.57504	-2.78032	-3.04802	-2.56115	-2.32228	-4.39091	-5.26482	-2.46449	-2.77945	-0.82101	-2.08348	-1.89047	-3.07033	-2.19555	-2.46831	-2.00576	-1.7793	-1.67726	0	-2.15181	0	-3.41324	-1.99983	-5.61676	-3.05936	-1.95552	-2.58359	-2.24412	-1.74716	-2.99123	-4.06809	-0.142332	-2.02158	-3.78738
ENSG00000270019.1	-4.85414	-3.32322	0	-4.489	-5.66016	-4.70391	-5.32991	-4.24453	-6.50699	-4.12042	-4.30749	-1.73757	-3.91794	-5.32967	-2.41871	-3.7576	-3.96288	-4.64562	-5.32868	-5.82677	-3.57347	-5.44738	-3.40604	-4.32458	-2.85157	-3.26604	-1.85064	-3.66793	-3.37811	-3.9728	-3.99568	-2.19633	-4.44478	-2.72421	-4.5043	-3.15146	-2.83027	-3.18239	-3.79933	-4.24192	-5.46001	-3.35112	-5.74861	-3.77772	-2.98115	-2.55021	-4.45418	-3.56671	-2.96994
ENSG00000222033.1	0	0	-1.06547	-2.24018	-4.52681	-3.93313	-4.78152	-4.69615	-5.37364	-4.57204	-4.17414	-5.71275	-7.36955	-5.19632	-6.51418	-3.47226	-4.05193	0	-4.78029	0	-4.70316	-2.37544	-6.5581	-5.26162	0	-6.03958	-4.69457	-4.7045	-3.17765	0	-4.86233	-5.73541	0	-1.88037	0	-6.773	-1.2196	-3.37097	-3.16348	-4.69353	-6.91162	-5.80274	-1.0303	-4.55126	-0.924971	-5.70227	-3.44636	-4.01832	-3.72112
ENSG00000260118.1	-0.654304	-1.62588	-2.78441	-2.37663	-3.54778	-1.85457	-1.26334	-3.90977	-6.39462	-3.74502	-3.07964	-0.315867	-4.48363	-4.63233	-1.95019	-3.23019	-2.0729	-1.53325	-4.63134	0	-4.46109	-6.33501	-1.90664	-2.62725	-1.8912	-2.01616	-1.48673	-1.89259	-3.75116	-5.86043	-1.18286	-2.36406	-5.33241	-3.90134	-1.26264	-2.50857	-2.63543	-2.58459	-2.68695	-1.88162	-1.95531	-2.06882	-3.05127	-2.52784	-1.51122	-3.81635	-1.64136	-2.93976	-1.57216
ENSG00000268129.1	-2.97477	-1.34431	0.245616	-3.02467	-2.61086	-1.82454	-3.86557	-0.32077	-0.72073	-1.27758	-1.18019	-1.7968	-3.13167	-3.86534	0.0456241	-1.70831	-1.60547	-1.18129	-0.542415	-3.36243	-0.46528	-3.98305	-1.94171	-2.6676	-1.70916	-1.31628	-0.530697	-0.61863	-1.72113	-1.70111	0	-4.81946	-1.81052	-0.911953	-2.03997	-0.535125	-0.75296	-0.952522	-1.87556	-1.45566	-1.99567	-1.42735	2.20758	-1.82796	-2.05739	0.120573	-1.2894	-2.5878	-1.69825
ENSG00000236882.6	-2.45973	-1.45605	0	-0.215438	-2.61366	-4.11685	-2.04241	-6.24244	-6.91993	-0.645838	-1.15564	-4.67407	-0.00894622	-2.49468	-4.4755	-3.17054	-3.86125	-5.64352	-2.49369	-5.23971	-3.98641	0	-0.69924	-3.63799	0	-5.00091	-4.07093	-2.27351	-2.20609	-2.47885	-3.82365	-1.52681	-3.15728	-2.7386	-2.91724	-4.73432	-3.87124	-4.91726	-1.37938	-3.48493	-4.55102	-3.59413	-3.35419	-2.70523	-2.6392	-3.85623	-5.28215	-1.57755	-4.21295
ENSG00000187013.4	-5.42223	-5.1137	-1.32737	-5.47213	-5.64328	-3.95007	-5.31303	-2.00527	-3.03069	-3.42548	-3.70565	-2.07433	-4.90106	-2.85337	-4.72376	-3.00377	-2.84647	-5.21371	-4.72684	-3.48796	-4.5566	-2.62316	-4.08961	-2.94514	-3.15662	0	-6.22608	-2.91409	-2.46815	-2.14857	-2.80888	-2.17946	-4.84294	-3.70734	-2.028	-1.84508	-1.90086	-2.16552	-2.25889	-1.70148	-2.63578	-3.16432	-2.14677	-2.76085	-1.08163	-1.98585	-4.11538	-4.35719	-3.63114
ENSG00000273381.1	-3.68317	-2.54456	-3.00821	-3.25913	-2.86469	-2.79597	-1.86125	-2.88593	-4.22054	-5.27138	-4.39955	-4.21569	-4.01	-4.04322	-3.08424	-3.1127	-4.0143	-3.55711	-2.25081	-2.54032	-3.3436	-6.27641	-3.61358	-2.73857	-1.7295	-3.00196	-1.63458	-4.34495	-4.7921	-2.38679	-1.8247	-2.61032	-1.95188	-2.79027	-2.96409	-3.48745	-5.00979	-3.91831	-2.92791	-2.07094	-2.58859	-3.37279	-6.16259	-2.02178	-2.48825	-6.07968	-2.69824	-2.23346	-3.02638
ENSG00000256742.1	0	-3.62185	-0.487597	-3.98027	-3.56647	-4.78014	0	-1.32077	-4.99826	-3.34866	-3.79876	-3.7524	-2.23928	-3.23598	-1.74648	-1.37441	-2.26151	-2.1369	-3.81995	-2.73308	-4.06474	0	-4.01279	-2.62321	0	-0.909317	-1.4123	-3.1592	0	-2.87911	0	-3.77507	-1.47662	-4.67491	-1.99557	-3.81266	-4.40901	-3.99559	-5.2906	-2.73319	-4.95128	-1.84239	-0.239879	-4.59092	-2.3025	-2.41999	-4.94545	-4.86534	-3.13929
ENSG00000259687.1	-2.33075	-0.321784	-0.447402	-3.79569	-3.96684	-1.72109	-1.76213	-1.91379	-3.81368	-3.334	-2.19914	-1.34543	-3.00223	-3.63636	-0.399626	-2.06429	-2.20246	-2.31488	0	0	-2.65776	-2.53168	-2.82821	-4.02359	-2.48018	-2.89466	-1.22772	-2.33718	-0.755189	-1.86445	-1.7174	-0.716011	-3.75147	-1.55173	-2.39595	-1.62807	-0.902492	-3.81101	-2.23154	-3.13357	-2.5443	-0.920841	-1.64026	-4.9913	-1.62487	-2.55734	-4.34583	0	-2.69167
ENSG00000253704.1	-3.06289	-2.33932	0	-3.52782	-4.8689	-5.49762	-3.21673	-3.23089	-4.39381	-6.6511	-3.40076	-3.29995	-3.66725	-5.53842	-1.94938	-3.74396	-3.0721	-3.26941	-3.73007	-3.71359	-4.78222	-5.07117	-3.1453	-2.88125	-3.79728	-2.62679	-3.28178	-2.7612	-3.80925	-4.18155	-2.8825	-2.10022	-2.84617	-3.80743	-3.01261	-3.36021	-2.87855	-4.71307	-2.92061	-5.45067	-4.08379	-3.55987	-3.15	-2.60796	-3.60494	-2.87444	-5.66293	-3.58281	-3.47825
ENSG00000231473.2	-6.00152	-4.10803	0	0	-5.22258	-5.85129	-4.89233	-6.39192	-4.48445	-4.00477	-3.86991	0	-4.48036	-4.89209	-4.30306	-5.90499	0	-3.79301	0	0	-5.13589	-6.0098	-2.76201	-4.37243	-4.73592	-4.15039	-2.48345	-3.49338	-4.16292	-3.95026	-4.5581	-4.84621	-6.0072	-3.42413	-4.06672	-4.88381	-2.89519	-3.74481	-5.36175	-4.21937	-3.7005	-3.32858	0	-5.66207	-4.95861	-3.49114	-5.0166	-3.93648	-3.36244
ENSG00000272217.1	-1.05723	0.00618429	-5.42181	-1.10713	-1.69332	-3.907	-0.948036	-2.64027	-3.12512	-2.06048	-1.26265	-3.2943	-3.21414	-1.36284	-2.35877	-1.37573	-1.14044	-2.52679	-3.36184	-1.85993	-2.1916	-2.25816	-2.13965	-2.29063	0.208374	-2.62114	-0.106199	-1.54909	-1.63367	-1.78358	-1.15438	-0.316959	-1.36247	-3.21681	-1.12243	-3.93951	-1.83542	-2.31509	-1.6101	-1.86005	-2.07814	-1.50982	-1.55938	-2.39585	-2.13985	-0.961889	-0.264952	-1.0853	-0.458787
ENSG00000273264.1	0	-4.05008	0	0	-4.57967	-2.62342	0	0	-4.4265	-2.7769	-3.227	-3.18064	-4.83745	-4.24918	-3.39711	-3.26208	-4.68975	0	-4.24819	0	0	-3.36689	-5.02599	-5.05145	0	-3.50748	0	-2.1724	0	-3.89231	-2.91519	0	0	-2.78122	-2.83885	-3.2409	0	0	0	-2.57646	0	0	0	-4.01916	0	-3.17016	-4.37369	-4.29357	0
ENSG00000246640.1	-4.56458	-3.84102	-7.51412	-2.19944	-2.04867	-3.19196	-3.58092	-2.21801	-1.31054	-1.86739	-5.28096	-0.801648	-1.67418	-1.87019	-1.39797	-2.29812	-3.48068	-2.85356	-1.68157	-2.01365	-1.11399	-1.37647	-1.47707	-5.52045	-0.211513	-1.97648	-3.25296	-3.26289	-1.08855	0.174738	-0.728839	-1.01695	-1.54051	-1.33949	-4.62978	-1.00946	-2.92773	-1.26056	-1.55557	-3.49293	-1.92252	-3.36112	-3.87408	-3.64016	-3.04774	-1.50166	-2.30664	-2.91458	-2.97994
ENSG00000154537.4	-3.1097	-0.993816	0.525724	0.125806	-0.686897	-2.95947	-1.54107	-5.50009	-4.17759	-1.41251	-0.80816	-2.12437	-4.00357	-1.83034	0.881548	-2.20581	-1.44084	0.0530143	-2.99927	-0.327438	-1.78463	-4.11798	-1.87019	-0.047646	-1.25913	-2.25857	0	-1.60156	1.71379	-2.6434	-2.08131	-1.49496	-2.11538	-2.39481	-0.42001	1.62273	0.294313	-0.651352	-3.46992	-1.00562	-0.738285	-1.11483	-1.83424	-0.60032	-0.40382	-2.11389	-1.53981	-0.186679	-2.47061
ENSG00000248243.1	-3.32067	-0.311703	-4.68525	-1.78561	-2.95676	-0.000514955	-1.40412	-2.01063	-3.38856	-2.51657	-0.381702	0.612188	-1.34007	-0.818922	-5.94413	-2.90221	-1.00795	-1.65272	-0.509805	-1.90098	-1.7546	-1.62851	-0.233161	-0.884222	-1.05507	-1.66218	-2.31717	-2.54949	-1.6076	-2.85437	-0.629319	-1.0779	-1.23889	-1.15832	0.0735624	-1.50251	1.24509	-0.993568	-4.68089	-0.664054	0.117857	-0.0627627	-1.46025	-2.39625	0.494833	2.10619	1.30811	-2.25563	-0.807115
ENSG00000230606.9	-5.20869	-5.90016	-4.40334	-4.35169	0	-4.73653	-4.39905	-4.89864	-5.46922	-3.68838	-4.75515	-3.38686	-5.22809	-4.63983	-4.83215	-4.3048	-3.95486	-4.00017	-3.14407	-3.50889	-2.75809	-6.21697	-3.74678	-5.31656	-3.13573	-3.18763	-4.3121	-5.21512	-4.37009	-4.28296	-3.76526	-1.86355	-2.6908	-3.82394	-5.95196	-7.09097	-4.68732	-4.2739	-5.10948	-2.17861	-3.70603	-2.21381	-4.51819	-2.4098	-3.94338	-3.69831	-6.6388	-2.97372	-5.28009
ENSG00000258884.1	-2.84291	-0.418907	0.377473	0.692153	-0.256612	-2.69268	-0.859248	0.88217	-1.17384	0.028306	-0.357662	0.450536	1.86148	-2.73348	0.756017	-0.00941196	-0.115155	1.33523	0.967954	0.184461	-0.655351	-3.43616	0.835485	-1.12071	1.69571	0.671186	-0.144267	1.08027	2.55368	0	-0.98445	-3.27256	-2.43355	-4.17241	0.261814	-1.5028	-0.262649	-0.100773	-0.395781	-0.23069	-0.448779	1.74757	1.54802	0.612019	0.11754	-0.538983	1.74687	0.922566	0.595876
ENSG00000227373.4	-2.43537	-2.01136	-5.38491	-3.26287	-3.65642	-2.54817	-2.74121	-4.0888	-4.08822	-1.50002	-0.344398	-3.2574	-1.74428	-3.9109	-2.18436	-3.33883	-2.35147	-4.81181	-1.73998	-3.08607	-2.69527	-3.44365	-2.78082	-2.32085	-4.75473	-1.70977	-2.50226	-1.51219	-3.7667	-1.96907	-3.57691	-2.28006	-1.11912	-2.12101	-3.50057	-2.73269	-1.59207	-0.15481	-0.625668	-4.23818	-1.87131	-4.34739	-0.806274	-1.03702	-3.97742	-1.07699	-2.57598	-2.63337	-1.96621
ENSG00000257660.4	-2.37169	-3.64813	-0.276837	-2.42159	-4.17771	-4.80642	-3.2625	-4.34705	-5.02454	-3.37494	-2.60265	-2.19372	-3.85053	-3.84722	-1.87968	-4.86012	-3.28779	-2.16318	-3.26127	-4.34432	-3.50606	-3.96494	-2.62403	-2.84213	-2.69105	-2.10552	-2.17555	-1.60052	-2.38109	-4.49035	-4.51323	0	-3.96233	-1.89384	-2.43689	-2.25398	-3.43529	-3.02187	-5.31688	-3.17451	-1.80763	-2.28371	-0.359268	0	-2.17677	-3.18324	-2.38677	-2.08426	-0.487493
ENSG00000271966.1	-4.37819	-3.33269	0	-5.01305	-1.54035	-3.49099	-3.85396	-3.54619	-4.44608	-2.64447	-3.09457	-1.61525	-3.85702	-1.94683	-0.655876	-1.95972	-3.70932	-2.43271	-3.85272	-3.76585	-4.51255	-3.97143	-2.4606	-3.07102	-1.69754	-2.79009	-2.59708	-4.19197	-2.90216	-3.49685	-2.1978	-1.48591	-4.96883	-1.70769	-3.70642	-4.84543	-3.11985	-4.02837	-3.32337	-2.59604	-3.66213	-3.2902	-2.95073	-2.16426	-2.04577	-2.60477	-3.6563	0	-1.90903
ENSG00000232774.6	-2.00687	1.44976	-3.99594	-1.74266	-2.91381	-2.81816	-2.8592	-3.28479	-3.47686	-1.86202	-1.16188	-2.95089	-2.4857	-2.93697	-1.9818	-2.2129	-3.0239	-1.83788	-1.1059	-0.246434	0.901977	-3.31771	-2.39185	-2.95496	-2.04383	-1.15573	-4.43521	-2.78218	-2.00849	-3.04958	-1.60297	-1.77561	-2.76257	-2.71293	-2.42354	-1.67234	-2.83697	-1.85527	-2.76919	0.373181	-3.0673	-2.54338	-1.94086	-3.87687	-1.80417	-2.77994	-2.77196	-2.82935	-2.42523
ENSG00000277159.1	0	-4.5368	-3.76933	-4.89522	-6.87373	-3.80201	-4.73613	-3.04308	-4.55064	-2.70173	-5.29867	-3.47471	-6.54655	-4.95829	-5.69118	-2.97118	-4.52439	-7.44416	-3.37233	-4.71842	-4.78705	-5.66096	-2.76547	-5.34552	-3.57972	-4.47962	-3.7561	0	-1.90719	-1.97693	-5.20926	-5.17544	-6.65836	-3.53924	-3.91052	-4.36504	-2.84591	-5.13293	-2.62059	-3.64814	-5.67358	-3.04114	-5.37722	-3.72826	-4.60977	-3.37677	-3.76087	-5.26571	-3.27663
ENSG00000227388.2	-3.73773	-5.4292	-0.0148443	-4.78763	-2.49935	0	-5.62854	-3.32077	-5.80562	0	-4.60612	-2.9748	-2.75713	-1.92786	-6.36119	-2.6412	-3.4839	0	-4.6273	-4.12539	-3.06474	-2.74601	-3.23518	-4.8456	0	-2.56467	-5.54159	-5.55152	-1.16217	-3.68647	-5.29431	-2.4125	-2.04297	-1.89731	-3.21797	-2.62001	-1.89443	-4.21798	-3.51299	-3.95558	-5.75863	-5.64975	-1.23988	0	-2.95785	-5.54928	-5.75281	-1.21326	-5.26857
ENSG00000250508.1	-6.51003	-4.2015	-5.28964	-5.23799	-7.73108	-3.90036	-6.40083	-4.31546	-5.57791	-3.70592	-4.26293	-4.16213	-5.1815	-3.59324	-6.54852	-4.60613	-6.2562	-3.30151	-3.00728	-5.89769	-6.64439	-5.19638	-6.1774	-3.74343	-3.43706	-4.07393	-5.31388	0	-7.25639	-5.04372	-4.25924	-5.03279	-5.93074	-5.25456	-4.57522	-4.22238	-0.859372	-3.8748	-5.54832	-4.50548	-5.209	-5.42204	-4.4976	0	-6.46711	-4.99964	-5.94014	-6.44499	-4.4559
ENSG00000274422.1	-3.5281	-2.82725	0	-3.18568	-2.16419	-2.85431	-2.83394	-0.614713	-3.34806	-2.40207	-2.39649	-1.1022	-2.61461	-2.28938	-1.90363	-1.6502	-1.53731	-2.4616	-3.24775	-2.16088	-1.6401	-2.58219	-1.82044	-1.69737	-1.87018	-2.03311	-1.63151	-3.01996	-2.32027	-2.81387	-1.83675	-1.05086	-1.60304	-2.02471	-1.21826	-1.2811	-5.6848	-1.89287	-1.39647	-1.83906	-1.99441	-2.63276	-5.8376	-3.10118	-0.880323	-2.63921	-1.54317	-1.79064	-0.746054
ENSG00000266651.1	-3.09084	-1.78231	-2.87045	0.903657	1.04566	0.381319	0.0183552	-1.0218	-0.071266	0.606349	-0.296261	0.479448	-1.11024	0.0185914	-0.190741	0.760582	0.0374555	-0.29736	-1.98041	-0.478504	0.582148	1.48584	-0.234656	0.26072	-0.503306	-0.432352	0.353232	0.0953742	0.33272	-1.62454	-0.0624529	1.3124	-0.396078	0.556939	-0.348684	-0.272683	-1.11004	1.01387	0.59333	1.53261	-0.0242809	-0.302417	-3.40034	-0.751386	-0.240571	-0.201948	1.21601	0.497761	-1.45175
ENSG00000277144.1	-0.283866	-1.03423	-2.48494	-0.454056	-2.14877	-0.77749	-1.01117	-3.73315	-2.41065	-2.60904	-2.05914	-3.16479	-2.5992	-2.01093	-2.38126	-1.02383	-1.93693	-2.13424	-0.569367	-3.31539	-2.25473	-1.76608	-1.89466	-2.62056	-1.34019	-2.49163	-4.73158	-2.41958	-0.866731	-0.291495	0.216143	-0.071971	-1.47397	-4.67226	-2.18556	-2.00265	-3.82139	-2.40797	-1.04002	-1.73054	-1.7787	-2.03238	-1.0673	-1.26634	-2.29984	-2.41734	-0.0359053	-0.162242	-2.6512
ENSG00000266970.1	-4.05723	-3.42678	-0.777952	-2.6477	-5.27829	-0.585073	-2.4886	-2.36016	0.0448046	-1.66816	-3.51058	0	-3.36614	-2.36284	-1.87334	-2.9607	-1.63348	-5.84871	-2.94681	0.964495	-2.49116	-0.0882343	-1.40268	-4.75007	-2.79163	-2.2061	-1.1062	-3.87102	-2.21863	-2.42101	-3.61381	-0.579993	-4.47795	0.242624	-2.53747	-0.51325	-2.62897	-1.47859	-1.66257	-1.27508	-4.49317	-1.11127	-1.9073	-3.39585	-2.69239	-4.28382	-1.37187	-3.99219	-3.26614
ENSG00000275897.1	-7.17215	-5.27866	-3.14441	-7.22205	-5.3932	-5.02192	-4.47799	-7.56254	-4.43268	-6.1754	-5.6255	-4.40921	-6.06602	-5.06272	-3.98826	-5.49065	-4.33336	-5.37867	-7.06172	0	-3.98459	-3.721	-6.83953	-4.54305	-4.90654	-4.32101	-4.976	-4.98593	-4.11116	-3.70585	-4.72872	0	-4.8559	-1.8506	-4.23735	-4.46947	-3.84342	-4.91544	-5.21044	-5.97496	-6.19305	-6.08417	-3.15972	-4.24773	-3.46627	-5.39873	-6.18722	-4.78518	-4.24355
ENSG00000250303.3	-2.22892	-4.01993	-1.02465	-3.54185	-0.802274	-1.87705	-2.35419	-2.33638	-1.02379	-1.2202	-5.41923	-0.60911	-0.147037	-2.02638	-1.80508	-2.10854	-1.32739	-2.92729	-0.0141556	-3.13116	-1.37536	-2.68466	-1.30334	-4.36921	-1.51265	-2.89236	-2.03277	-1.97232	-1.65336	-0.45034	-1.35253	0	-3.89356	-1.11216	-2.74158	-0.410762	-0.171496	-0.129562	-0.490409	-2.44677	-1.63315	-1.62156	1.12454	-4.79636	-1.43945	-1.36239	-3.396	-3.42691	-1.61136
ENSG00000277459.1	-3.14441	-1.37645	-1.50899	-2.38695	-2.7805	0	-2.71329	-3.5348	-2.2123	-1.97773	-5.59776	-1.50701	-2.03828	-1.12809	-1.76787	-1.58844	-3.15362	-3.93589	0	-2.53207	-2.95685	-1.45225	-2.48986	-3.25228	-1.29384	-4.29328	-3.94826	-0.710267	-0.0327924	-2.35618	-1.24155	-1.81917	-4.15009	2.14448	-3.62464	2.83749	-5.62304	0.434232	-0.21923	-2.94722	-1.70588	-4.05643	-1.64656	-2.80495	-4.10149	-2.63403	-2.83756	0	-3.67525
ENSG00000235499.1	-2.86528	1.06774	0.0920709	1.2003	-0.211865	0.787451	1.38687	0.48129	0.00543035	-0.646138	0.453961	0.18716	-1.75915	0.414076	0.73365	-0.446817	-0.321947	-0.656763	-0.639377	-0.0305522	0.502853	-0.873563	0.637267	1.58484	0.815363	0.208245	-0.166635	-3.26403	-0.496168	-1.39898	1.35073	1.22863	-3.45592	0.612573	0.528953	0.31133	-1.22843	1.43874	0.0475143	0.746942	-0.663792	1.2227	-0.952391	-1.78886	0.592672	-0.939862	-0.377855	1.19976	1.12744
ENSG00000180279.5	-3.39135	-3.81979	0.131599	0	0	-2.97808	-3.60408	-2.01621	-3.1962	-1.80964	0	-4.53531	-1.19211	-1.79649	0.263173	-2.80939	-3.04441	-4.50476	-3.60285	-3.51598	-5.84764	-3.72156	-4.05873	-4.82115	-2.44767	-4.86214	0.264227	-3.9421	-2.87468	-3.24698	-4.26985	-2.55797	-4.13399	-6.45782	-3.77848	-3.59556	-2.86998	-2.31906	-2.26615	-3.51609	-3.14922	-2.30337	-2.43782	-1.67338	-1.73176	-2.71747	-1.48042	-2.64824	-2.92219
ENSG00000268362.4	-4.94029	-3.63176	-0.929824	-0.530752	-1.76902	-2.9827	-3.83109	-0.319454	-4.68625	-5.35857	-1.43944	-4.76232	-4.41912	-6.83085	-3.56375	-2.59582	-2.18396	-4.40984	-3.50793	-4.00602	-3.61522	-4.36361	-3.21535	-3.17369	-2.21525	-1.62972	-4.15918	-3.16911	0.442632	-4.47399	-1.9119	-5.78498	-5.94596	-1.61874	-1.64793	-1.15014	-5.83395	-6.0055	-1.65665	-1.7431	-2.37623	-2.04495	-2.24979	-4.60083	-3.39487	-3.75183	-4.3704	-0.432304	-0.52861
ENSG00000271983.1	-2.20047	0	0.916085	-3.83532	0	-2.05023	-1.86888	0	-3.85332	-1.98132	-3.65381	-0.519993	-2.94233	-3.676	-1.502	-1.36696	-2.11656	-1.40698	-2.675	-1.17309	-2.11244	-3.79371	0.132158	-2.30834	-0.519822	-1.61237	-0.781927	-2.01425	-2.53179	0.488229	-0.641563	-1.30819	-0.469177	-0.623075	-2.26566	-2.66771	-2.6791	-2.85064	-1.97573	-1.12881	-3.22137	-1.23801	-0.18804	-3.44597	-1.52012	-0.42705	0.106389	-3.13543	-2.14634
ENSG00000272138.1	-3.4668	-2.83634	-1.24641	-3.93173	-4.10289	-2.7316	-5.3576	-4.27223	0	-3.88508	-2.75022	-4.28882	-3.94563	-5.35736	-2.76833	-4.37026	-4.21297	-4.25828	-2.54901	-4.85446	-4.0162	-5.47508	-1.88624	0	-4.20119	0	0	-3.69562	-4.21316	-2.00049	-1.70144	0	0	-2.21133	-2.72464	-4.34908	-4.36046	-0.831569	-2.82702	-4.26961	-5.4877	-4.37881	-2.45437	-3.12734	-4.00884	-5.27834	-5.48187	-2.5944	-2.6757
ENSG00000270557.1	-1.62918	-1.86122	-1.74583	-3.35715	-2.68031	-2.15702	-1.81955	-1.84965	-3.69707	-3.63243	-1.99507	-1.36375	-1.93809	0	0.0327575	-2.21072	-2.37536	-3.09874	-2.05932	-1.01685	-2.30412	-4.63746	-1.90424	-2.86259	-0.363577	-0.970694	-1.26311	-3.85801	-1.46866	-1.70345	-1.3784	-1.15194	-1.38693	-2.37372	-1.99394	-3.18954	-1.85989	-1.44647	-1.81948	-1.26207	-3.32816	-1.84076	-3.35372	-1.0418	-0.55652	-1.9813	-1.32233	-2.24222	-2.45958
ENSG00000235576.1	0.554202	-0.651842	4.12509	1.50431	1.94196	1.93709	0.589398	4.43434	3.58224	3.11167	1.96875	3.09675	3.74213	0.429169	0.608812	1.8834	2.87842	2.08465	2.04314	4.16654	2.83938	1.50939	2.93994	0.861369	0.0828429	2.78385	1.01338	1.32538	-0.344165	2.28354	-0.3243	2.16894	3.43605	3.42437	-0.832923	-0.842653	1.07557	-2.24798	-3.12795	2.55874	2.76596	2.52971	4.44633	-0.258346	4.43169	1.17561	-0.323368	2.3634	1.31615
ENSG00000260698.1	-4.20826	-3.2623	-4.93541	-4.42809	-3.69235	-3.90603	-2.87668	-4.76858	-5.86111	0	-5.02418	-4.87829	-4.85702	-4.09883	-3.54222	-3.69669	-4.3874	-5.58471	-5.26776	-3.76585	-5.92759	-7.38647	-4.34513	-5.48606	-3.30523	-3.52705	-2.53819	-4.87005	-4.80262	-5.91189	-4.61284	-3.22288	-2.52588	-4.42229	-5.12146	-6.26047	-3.76936	-7.4434	-4.73841	-4.01108	-5.07716	-3.83077	-6.68769	-3.86881	-2.92024	-4.01981	-3.48637	-2.55826	-4.90903
ENSG00000269946.1	2.18746	-2.4109	0.822884	-2.18436	0.644479	-1.5692	0.296656	-0.409385	0.212682	-0.72268	-0.172778	-0.956496	1.3867	0.637929	-1.34289	-0.037932	-1.72864	-1.18898	-0.149571	1.14083	-1.04644	0.272288	0.0726244	-0.952832	0.131138	-0.546368	0.476715	-0.36329	0.441096	-0.445774	-0.46865	-0.564119	0.362355	1.62349	-0.977273	0.568212	-3.19806	-2.78464	0.0902717	0.178195	0.166557	-2.04648	0.778422	0.204987	0.323485	0.86134	0.587424	-2.06943	-2.25027
ENSG00000271553.1	1.44494	-0.132356	0	-3.20699	-2.48506	-1.49229	-1.53332	-2.6544	-3.03233	-3.16034	-2.41779	-3.46455	-4.44328	-0.900818	-1.83302	-0.867911	-3.29558	-5.75593	-0.899823	-0.828548	-1.92889	-2.27229	-1.01711	-3.65728	-0.79195	-2.79138	0.401624	-4.77823	-1.90346	-1.49815	-0.66304	0.340611	0.333657	-3.00854	-1.27476	-2.03937	-2.63572	-3.70773	-4.00274	-0.374943	-1.73742	-1.41703	-3.27395	-0.537529	-1.75161	-4.19103	-0.198161	-1.50709	-2.91032
ENSG00000279873.2	0	-4.63417	-2.08488	-3.9926	-5.74872	-2.20751	-4.41847	-4.91806	-4.27362	-4.20898	-4.39605	-1.76473	-4.19914	-4.83327	-4.34377	-3.62377	-3.8588	-3.51179	-6.41723	-4.33036	-4.3401	-2.36602	-2.94711	-4.2205	-2.67709	-3.09157	-1.24405	-4.75648	-3.9521	-2.4764	-2.6248	-1.78739	-2.36341	-3.2722	-4.0079	-2.95051	-4.42133	-3.13344	-3.88788	-2.33048	-3.9636	-1.35222	0	0	-3.16282	-4.33921	-0.735381	-3.00319	-3.15161
ENSG00000272102.1	0	-1.15444	-0.702012	-2.65037	-3.14345	-1.45024	-1.64328	-0.612352	-1.40532	-3.92565	-3.05382	-4.74443	0	-1.35353	-1.37593	-2.82586	-3.25353	-1.90653	-3.81197	-1.7251	-2.4718	-1.34572	-3.00481	-2.03027	-1.65679	-3.07126	-0.726253	-1.03574	-2.0838	-1.64874	-2.15704	-3.18212	-1.46864	-1.41901	-1.81767	-1.10424	-1.9416	-0.665684	-1.19516	-1.72521	-2.9433	-2.83441	-0.646938	-1.26102	-2.46445	-2.73394	-2.13012	-2.85736	-3.45324
ENSG00000229178.1	-3.97563	0	-5.92517	-4.28856	-3.45971	-6.41036	-2.64404	-4.36602	-5.62848	-2.24191	-3.20658	-1.57526	-4.23207	-3.6438	-2.09659	-2.87909	-3.7218	-5.35207	-3.45016	-3.36329	-1.56567	-3.98391	-3.76854	-3.79399	-5.29498	-3.38753	-4.77948	-4.78941	-2.40006	-3.28693	-3.79524	-2.59792	-1.39634	-3.0572	-2.23347	-2.98344	-3.23186	-4.6258	-6.92081	-3.55605	-3.77414	-3.30268	-2.54816	-4.63617	-3.10264	-0.945872	-0.903239	-2.6882	-2.7695
ENSG00000245685.5	-5.01284	-3.38238	0	-6.06273	-7.23389	-4.86261	-5.90364	-5.81827	-6.08073	-4.69416	-4.46619	-3.37543	-5.16974	-4.58148	-4.31437	-3.59437	-3.25651	0	-2.99552	-4.07857	-4.1472	0	-4.87286	-4.89832	-4.16227	-2.99178	-2.42438	-5.82662	-6.7592	-3.96157	-3.10998	-2.95064	-7.01852	-4.17241	-3.27068	-4.89512	-4.16954	-3.07805	-3.7881	-2.29209	-3.57431	-2.67693	0	-5.67338	-2.16257	-3.01703	-3.32747	-5.9478	-2.63678
ENSG00000271868.1	-2.72861	-2.42008	0	-1.07807	-0.557346	-1.40845	-0.297486	-1.94908	-1.62657	-2.40993	-1.86003	-2.96568	-2.40009	-0.712287	0.232891	-0.632074	-0.474783	-2.19816	-0.711292	-1.30892	-1.27801	-3.15193	-0.936555	0.0379883	-3.463	-1.29251	0.859853	-1.54239	-2.47497	0.0596198	-2.28518	-0.485836	-2.41236	-1.15122	-4.79381	-2.61089	-0.885311	-1.20886	-1.7669	-0.139106	-2.42758	-1.3187	-3.03811	-0.301692	-1.94873	-1.7328	0.256316	-1.49365	-1.67448
ENSG00000232104.3	-5.45209	-5.14356	0	-3.69463	-3.67315	-3.7169	-2.53554	-0.672561	-1.47559	-3.45534	-1.69599	-2.18666	-2.683	-3.17273	-3.16866	-2.35556	-2.13937	-2.15611	-2.2542	-3.51783	-3.41653	-3.87541	-2.79754	-2.62136	-2.86456	-4.016	-3.25595	-3.68091	-6.19846	-3.98579	-3.00867	-1.25239	-2.87281	-3.19663	-4.51729	-2.87494	-5.34576	-4.19538	-4.00496	-0.700317	-1.38553	-1.55675	-4.17663	-3.11264	-1.86486	-1.40566	-3.14524	-2.92762	-3.39797
ENSG00000272416.1	1.15899	-0.4019	-2.19048	-1.76033	0.85993	-1.45328	1.07337	-2.10082	-3.47876	-0.954688	-2.27925	-3.2329	-1.36614	-3.71647	1.27855	-1.8549	-1.04156	-1.03243	-2.71548	-3.21357	-2.54524	-1.83419	-2.61881	-1.05931	-1.33791	-3.55974	0.762556	-1.05473	-2.83531	-0.857105	-1.79752	-3.25556	-2.24662	-2.24852	-0.668712	-2.97122	-0.0315181	-3.89112	-1.68363	-1.04376	-1.62442	-1.62245	-3.13541	-0.26406	-1.70499	-2.22242	-1.10402	-1.43894	-1.54939
ENSG00000214894.5	0	-2.71164	-3.59119	-4.39199	0	-2.86994	-3.49593	-6.31745	-4.99495	-6.93031	-6.38041	-5.16412	-3.08396	-5.23266	-2.96556	-3.50859	-3.55775	-4.13358	-6.81663	-3.31472	-2.97396	-4.93534	-3.89399	-4.61989	-3.33952	-5.07592	0	-5.15588	-3.08846	-3.87579	-3.48363	-3.77175	-3.23229	-3.97116	-4.99225	-4.80934	-4.40569	-1.94788	-3.96535	-3.92252	-5.94796	-3.66915	-4.23656	-4.5876	-2.61112	-3.27917	-5.35717	-3.86202	-7.45789
ENSG00000242516.1	-6.47818	-4.58469	-6.25779	0.991562	-0.144642	-5.00602	-2.2397	-5.06122	-5.54607	1.38894	-3.84406	-5.30021	-1.20212	-4.04682	-4.77971	-3.47475	0.380511	0.973514	-0.586391	0.428779	-1.4628	-5.9015	-5.14555	-3.92308	-6.21257	-0.497761	-0.0246446	0.650552	-7.22454	-5.42691	-1.42004	-4.51551	-4.48386	0.289037	-3.84294	-4.19054	0	-4.22146	-0.740369	-4.95906	0.222018	-5.06827	-4.78768	-0.553761	-6.02023	0.0765974	-1.34351	0	1.21015
ENSG00000260360.1	-1.89076	-3.0228	0	-4.60362	-5.35974	-3.98845	-2.1226	-3.20715	-2.74714	-2.6825	-3.1326	-1.87325	-4.29559	-4.02925	-2.85525	-4.04215	-3.66246	-4.93016	-3.70633	-2.52635	-3.46569	-3.82504	-1.55813	-2.66159	-2.87308	-2.28755	-3.62061	-3.63054	-2.88505	-2.35045	-4.69526	-2.81345	-4.14436	-3.07587	-3.03395	-3.436	-2.15788	-2.39654	-3.17698	-2.9415	-4.15959	-0.841245	-3.12626	-2.21426	-2.68073	-3.14287	-2.98383	-3.75171	-1.58206
ENSG00000281538.1	-3.14441	-1.51395	-2.70163	-2.60934	-1.04353	-0.906715	-1.03521	-1.62791	-2.62733	-0.977734	-1.27583	-1.38148	-1.9228	-1.03498	-0.0674316	-2.24052	-1.22762	-0.543574	0.135943	-0.724718	-1.69381	-1.69326	-0.16793	-1.74978	0.706159	-0.833844	1.24156	-0.636266	-1.56885	-2.09315	0.468941	0.296304	-0.626525	-3.08159	-0.624645	-2.70476	-0.9226	-2.0397	-2.50463	0.374705	-0.772995	0.0728574	-1.45391	0.239439	-0.598994	-1.25552	1.37968	-0.757442	-0.0605368
ENSG00000259772.5	-4.86805	-5.14449	-2.73013	-2.69556	-5.08911	-2.49543	-4.75886	-0.0620496	0.324587	-1.17086	-0.736438	-2.02712	-1.84438	-1.69973	-1.55292	-0.801891	1.44947	-2.92257	-4.34259	-0.28609	-1.33945	-3.13937	-0.287502	-3.56089	-2.01748	-2.43196	-4.25687	-6.2668	-1.95145	-3.98671	-2.42463	-0.439723	-4.87373	-4.19755	-5.51821	-6.3353	-3.47221	-3.3483	-4.22828	0.153561	-3.01449	-0.721175	-1.85563	-1.65413	-0.200647	-2.6796	-0.68673	-1.48109	-2.22897
ENSG00000280924.1	-4.58999	-5.86642	-1.25412	0	-5.396	-5.02472	0	-6.56534	-6.24284	-5.1782	-2.38037	-5.99698	0	0	0	-3.75649	-5.50609	-5.96643	-6.06452	-4.56261	-6.30932	-5.18323	-3.25736	-3.16734	0	-5.32382	-5.9788	-4.98873	-1.75139	-2.53872	0	0	-6.18063	-3.91949	-3.07022	-6.05723	-4.06862	-5.24016	-4.95021	0	-3.19585	-6.08697	-5.48445	-5.8355	-6.717	0	-3.0201	-4.52495	-6.70579
ENSG00000268798.1	-4.36124	-4.05271	0	-1.47254	-1.30927	-1.70851	-2.13657	-1.81303	-1.84416	-1.70152	-2.81459	-3.18327	-2.84007	-0.514841	-1.71168	-1.20581	-2.02941	-2.56776	-3.51385	-0.874433	-2.62114	-2.25404	-2.29165	-1.59464	-1.68059	-2.77314	-0.464653	-1.23642	-2.1076	-3.89494	-2.04334	-0.703427	-2.25144	-3.69074	-2.10451	-1.65856	-2.9654	-3.42645	-2.84699	-1.28958	-2.64518	-1.33466	-3.67074	0.437648	-3.31832	-2.95039	-2.26084	-1.42173	-1.83318
ENSG00000273181.1	-2.31168	-2.81051	0	-3.58397	0	-1.96881	-4.00984	-2.70208	-5.18693	-1.95236	0	-1.48163	-3.59787	-5.00961	-0.884518	-2.21515	-2.12824	-4.91052	-1.20126	0	-3.66844	-3.54236	-1.69895	-1.81187	-1.5315	-2.2679	-1.75297	-2.93282	-1.8654	-2.33081	-2.67561	-2.37876	-2.31736	-3.27861	-2.59927	-2.00132	-1.13824	-2.86232	-3.8943	-2.59992	-3.13994	-1.86113	-1.42854	-1.97223	-2.20165	0.0694154	-1.81218	-2.73207	-1.74298
ENSG00000277692.1	-2.93461	-1.62608	0	-2.98451	-1.22967	-4.10631	-2.82542	-3.06197	-3.32443	-4.25979	-3.70989	-3.07857	-2.41345	-3.56215	-1.42057	-2.83808	-3.26575	-5.04802	-5.14611	-2.6442	-4.39091	-5.26482	-2.75399	-3.62745	0	0	-2.25304	-4.07033	-1.41794	-3.79024	-3.81312	-3.10123	-2.67726	-3.19372	-2.32174	-4.13882	-4.73517	-3.73679	-2.61676	-1.252	-3.69248	-2.58359	-1.56604	-2.59516	-2.62866	-3.48313	-1.81218	-2.60654	-4.20242
ENSG00000259807.1	-5.29344	-3.56987	-2.54254	-4.34333	-7.09945	-3.40624	-2.96185	-2.62494	-2.08831	-2.88165	-3.00982	-2.79354	-1.68481	-3.44704	-0.815361	-0.322432	-3.03961	-5.08492	-4.44604	-2.94414	-2.62045	-2.71676	-2.79089	-2.76388	-1.36487	-5.02727	-3.22282	-2.23275	-2.1012	-3.60474	-0.680087	-2.19953	-3.88408	-2.97908	-1.42004	-1.47528	-4.54967	-2.42005	-2.43127	-1.2889	-4.31434	-3.79042	-6.1879	-2.73159	-3.02813	-2.68995	-2.80601	-2.49143	-4.82427
ENSG00000260430.1	-3.23695	-1.54991	-2.60152	-4.02381	-4.19497	-0.885082	-1.99025	0	-3.30484	-3.97716	-2.8423	-2.57355	-3.45275	-2.12751	-3.59737	-4.46234	-2.89001	-3.35036	-2.12652	-3.94654	-2.88589	-3.56716	-3.4189	-4.25171	-0.833837	-1.53782	-4.36273	-2.56531	-2.49788	-1.92265	-0.257469	-3.08164	-1.31663	-2.60297	-3.30214	-2.6338	-2.71558	-1.81673	-2.74917	-3.77673	-1.49232	-2.88593	-2.86838	-1.89749	-4.10092	-2.37042	-2.76659	-4.49384	-0.73216
ENSG00000272097.1	-2.55814	-3.24961	0	-3.83043	-3.26462	-2.30837	-2.79687	-1.75589	-3.43338	-4.78378	-2.64892	-0.902121	-2.08944	-2.6711	-1.56269	-1.51407	-2.11167	-2.98705	-1.44771	-2.05272	-2.59297	-3.37378	-2.27798	-3.25097	-1.193	-1.9294	-2.08189	-1.27239	-1.94193	-2.72927	-0.877675	-0.718331	-3.20125	-1.86211	-2.73025	-1.92585	-2.5962	-2.18278	-2.02528	-2.36095	-1.4322	-2.57707	-1.675	-2.3256	-1.77826	-2.59208	-2.79561	-1.84102	-2.19589
ENSG00000277559.1	-0.12387	0.382106	1.3051	0.226772	-1.81885	1.4196	0.428933	1.21692	-0.77672	0.853515	0.816016	0.410246	0.84796	0.926669	2.19127	0.186791	0.455728	-1.62061	0.711935	0.599498	0.662693	-0.0755678	1.88683	1.33386	0.467507	1.50967	1.65081	-0.28383	0.42451	0.222138	1.36686	0.0880249	0.422994	0.362205	0.350298	1.48613	-0.948675	-0.636543	0.730032	0.984049	0.255765	0.617939	0.425272	-0.0359536	0.667507	1.07417	1.29757	0.25151	1.19862
ENSG00000244733.5	-0.226618	-4.05559	-4.05063	-3.15098	-1.65917	-1.78093	-1.87641	-3.16955	-4.75394	-3.88194	-2.67997	-3.18615	-1.57992	-2.57662	-2.40262	-2.34159	-2.43222	-1.57064	-3.99066	-3.26636	-2.36098	-2.99389	-2.49545	-2.16943	-1.72	-5.83492	-1.4899	-3.17791	-4.43241	-2.13228	-0.688035	-3.72338	-2.69173	-3.10866	-3.16628	-2.17601	-3.46424	-2.2277	-4.04627	-0.422774	-2.45902	-1.95421	-5.99555	-0.731885	-1.67351	-4.4976	-1.24169	-1.06642	-2.0876
ENSG00000214146.2	-3.8622	-3.13863	-2.81173	-1.03762	-4.44582	-4.55996	-3.33796	0	-5.51505	-2.45041	-4.67811	-2.76669	-2.92599	-5.92269	-2.44613	-3.93558	-3.90382	-3.65368	-5.33673	-6.41978	-4.16649	-6.0404	-3.99906	-4.40303	0	-6.18099	-0.905237	-4.52398	-3.31905	-3.98086	-2.88826	-5.87681	-5.45283	-7.77666	-5.09732	-4.9144	-3.34082	-4.28998	-3.48545	-2.92804	-4.46806	-1.77421	-3.1717	-3.88531	-4.11474	-1.88947	-4.04719	-3.96708	-4.10353
ENSG00000262228.2	-4.62017	-3.31164	-3.52531	-2.21063	-1.28663	-3.66258	-4.18904	-4.01056	-4.10309	-3.81606	-1.58166	-2.27227	-2.39856	-2.70338	-2.9217	-2.71628	-4.14395	-4.82669	-4.92478	-2.6859	-3.2951	-3.45853	-2.28755	-4.14308	-2.03263	-2.76903	-3.61667	-4.43395	-3.78157	-4.5689	-3.17674	-1.70997	-2.81849	-2.55735	-3.36344	-3.33253	-4.29144	-4.68538	-3.98039	-2.25306	-4.05611	-3.07275	0	-2.82128	-2.46178	-3.84675	-1.88036	-4.2332	-3.06354
ENSG00000228037.1	-2.811	-3.8244	-0.912546	-3.59787	-4.35399	-2.39774	-3.02374	-2.71597	-4.20082	-2.81425	-2.77893	-2.95496	-2.80441	-1.70157	-2.75639	-0.644079	-1.8791	-4.92441	0	-0.713241	-1.80787	-3.55625	-1.27675	-4.82577	-3.86733	-2.69684	-1.47735	-2.62479	-4.8793	0	-2.68951	-3.39266	-1.67918	-3.87747	-2.8762	-5.01521	-2.28963	-4.19815	-4.49316	-1.02886	-3.56887	-3.04495	-1.85747	-1.79348	-1.50505	-1.24404	-1.24112	-3.06789	-4.07881
ENSG00000213057.5	-6.28119	-3.27222	-4.64576	-4.00915	-3.50224	-3.13095	-2.36463	-3.86422	-3.88964	-4.47708	-1.39468	-1.12593	-3.85313	-3.71232	-3.26079	-2.37729	-3.36439	-4.75074	-3.84883	-2.49892	-3.95612	-4.48211	-2.19367	-1.70723	-1.69365	-1.57207	-2.27768	-7.09497	-3.85762	-1.32303	-1.51583	-4.80395	-3.96493	-1.87598	-1.25892	-5.57851	-3.95246	-2.43951	-4.05645	-1.62457	-3.21463	-2.87127	-6.59069	-4.94173	-1.73577	-3.50777	-2.54137	-3.51571	-1.52662
ENSG00000178440.5	0	-3.42313	0	-2.36652	-2.36775	-2.58142	-0.959496	-4.70701	-2.21458	-3.31987	-2.96261	-1.67922	-4.21049	-2.20719	-2.13273	-2.22008	-3.06279	-5.1081	-2.20619	-1.70428	-1.36352	-4.3249	-2.17664	-2.30901	-2.05101	-1.88052	-0.661042	-5.1304	-1.74105	-3.26536	-0.551266	-0.701876	-5.3223	-1.4173	-3.05989	-1.1989	-3.79525	-1.38183	-2.86949	-1.21254	-2.33752	-1.22864	0	-4.97716	-1.39923	-4.12817	-2.16177	-1.79215	-3.0401
ENSG00000279141.2	0.841076	-0.00146027	2.04449	-1.08751	-3.40551	0.480346	1.28061	-2.38221	-4.64466	-2.2581	1.06263	0.208526	-2.22272	0.183708	-1.60032	-2.05398	-0.641125	-2.90883	-1.02341	-1.92005	-1.87825	-0.518969	1.21323	0.185718	0.797355	-1.91829	0.567737	-1.77585	-0.0193592	1.14219	0.797387	-1.17354	0.693671	0.322542	-1.01262	0.715867	0.60993	-0.7965	0.287003	3.03932	-0.0898843	0.561056	-0.777754	-1.40443	1.3365	0.82113	3.91198	0.493888	0.130792
ENSG00000269961.1	-1.50683	-1.1983	-1.7339	-3.87865	-4.04981	-3.09356	-1.54963	-2.63419	-2.31168	-2.02465	-0.960175	-0.191352	-1.60715	-3.13436	-1.13029	-3.73222	-3.15989	-4.62024	-2.3964	-2.21642	-2.64119	-2.51511	-1.10381	-2.52159	-2.56315	0	-1.17318	-1.64254	-2.25319	-1.04053	-2.80037	-1.21401	-1.66451	-2.76594	-2.0866	-2.71104	-2.50003	-2.08661	-3.18898	-1.17214	-2.0423	-0.418843	-0.81633	-0.58241	-0.670363	-0.552839	-0.756367	-2.44179	-1.4527
ENSG00000274341.1	-3.05723	-3.7487	0.622586	-1.29977	-4.27829	-3.907	-1.62611	-1.44763	-2.54016	-3.06048	-1.51058	-2.2943	-0.36614	-1.9478	-1.22126	-1.37573	-1.06644	-0.148275	-2.94681	0	-0.86967	-1.48055	-1.40268	-4.75007	-0.206664	-2.2061	0.226376	-1.87102	-2.8036	0	-1.29188	-1.31696	-0.892985	-0.553843	-2.53747	-2.93951	-1.72851	-2.53748	-0.717016	-0.538118	-3.07814	-1.64732	-1.36674	-3.71778	0.354917	-2.28382	-1.07231	-0.992193	-1.12864
ENSG00000242553.1	-3.86528	-2.97179	-1.22986	-3.33022	-1.76441	-2.71505	-1.43416	-1.25568	-2.34821	-2.06118	-2.31863	0.0131305	-2.02219	-1.17089	-0.681388	-1.06831	-1.87449	-2.0718	-1.16989	-1.93102	-1.54022	-4.87356	-1.9477	-0.558115	-1.59967	-1.69222	-1.86178	-4.67907	-1.44172	-0.814017	-1.42186	0.0449174	-1.70103	-1.15039	-1.02359	-4.74756	-2.34391	0.156967	-1.90358	-0.208664	-1.18574	-0.0224098	-1.00486	-1.52583	-1.2374	-2.3549	-1.17992	-1.0998	-1.48923
ENSG00000262370.4	-1.63082	-1.65932	-1.67346	-1.45832	-3.26691	-2.15866	-2.93666	-0.851285	-1.37678	-2.0491	-0.421199	-0.789879	-0.446683	-2.01888	-1.08435	-0.909789	-1.73956	-1.68533	-1.93543	0.177918	-1.6497	-1.90213	0.116845	-2.73869	-2.14282	-0.905213	-2.21228	-3.02956	-1.71421	-1.94212	-2.45042	-0.332547	0.0453309	-2.37535	-1.03305	0	-2.69441	-4.28099	-4.576	-1.62628	-1.48179	-0.879867	-2.20335	-0.876324	-0.454045	-0.073129	-0.707291	-2.98081	-3.16165
ENSG00000239467.4	0	-5.45176	0	-0.680899	-1.12336	-4.02509	-4.06613	-2.69125	-0.401909	-1.59361	-5.21363	-1.41239	-3.43176	-4.65085	0.330498	-1.85639	-0.599568	-1.96681	0	0	-1.64672	-0.153857	-5.42766	-4.86816	-1.68732	-4.90915	0.793412	-0.326143	-1.80621	-2.12406	-4.31686	-1.28305	-3.76596	0.250064	-2.82548	-3.05761	1.56198	-0.781106	-0.728191	-3.5631	-3.45926	-3.08734	-0.677471	-0.250906	-1.71737	-2.40191	-5.77536	-0.74105	-2.0432
ENSG00000277423.1	-2.22143	-1.42747	0	-3.59325	-2.76441	-0.585766	-1.6268	-2.93375	-2.02628	-2.22467	-4.9967	-3.36538	-2.70026	-0.848958	-1.58185	-4.44682	-2.87449	0	-4.43293	-1.60909	-2.35579	-1.38171	-2.04081	-0.776755	-0.277747	-2.10726	-2.34721	-2.77218	-1.48236	-1.07705	-1.29257	-2.06611	0	-2.96596	-3.60855	-4.42564	-1.43702	-4.60857	-4.90358	-2.02424	-3.56426	-2.13344	-3.85286	-4.2039	-2.76347	-1.18497	-2.97346	-1.67096	-3.07419
ENSG00000269947.1	0	-2.12363	0.525189	-1.82998	-0.212644	-2.76736	-2.32297	-2.04495	-3.72244	-2.24277	-2.23343	-1.25419	-1.39642	-0.606524	-1.21912	-1.97306	-1.40073	-1.57157	-1.80716	-3.04222	-0.914452	-1.78837	-2	-1.40879	-1.16656	-1.58103	-2.23602	-1.14641	-1.66395	-3.18825	-1.21113	-1.17732	-1.66023	-1.46049	-1.39783	-1.95188	-2.39622	-2.13481	-1.69285	-2.23498	-1.26042	-2.34418	0.0948353	-0.8126	-0.874675	-1.88114	-0.167129	-1.58952	-2.06992
ENSG00000246523.6	-3.11697	-3.3934	0	-6.33679	-5.50795	-1.27868	-3.1777	-3.50736	-3.54743	-5.29014	-3.15528	-2.939	-3.95837	-3.85553	-3.103	-3.02043	-6.61803	-5.07837	-4.17647	-5.67456	-4.42126	-2.48782	-3.95427	-3.6578	-3.43632	-5.43576	-2.39031	-3.77875	-3.03326	-3.82059	-4.84347	-3.80965	-3.97064	0.108121	-3.76713	0.474681	-2.76552	-2.26464	-5.06215	-4.08971	-4.3078	0	-3.27447	-5.94744	-3.1285	-1.51348	-4.30197	-6.22185	-2.4958
ENSG00000261211.1	-1.01849	0.336333	-3.5847	-2.03736	-6.76311	-0.106418	-0.293305	-0.489502	-1.18368	-2.2599	-1.97303	0.220882	-1.43592	-3.18469	-1.91759	-0.704049	-0.258477	-3.08561	-0.281878	-3.34475	-1.50649	-3.46287	-1.1009	-0.958761	-2.57601	-0.646524	-1.61799	-4.77087	-0.601915	-0.38925	0.649566	-0.47985	-2.19018	-1.11666	-1.09945	-2.33687	-8.02068	-0.787087	-2.01963	-1.23634	-2.0711	0.0216654	-1.42529	-0.710744	-2.15336	0.177783	-2.06527	-2.83316	-1.166
ENSG00000251580.1	-0.171696	-0.933555	0.497676	-0.913469	-0.463138	-1.82882	-0.995385	0.878484	0.690028	0	-0.695432	0.368847	-1.58341	-2.45458	0.670507	-0.660122	0.719562	-2.77053	0.972679	-0.629748	0.108977	-4.57229	-1.53095	-0.556406	0.701594	0.0944765	0.632133	2.28041	0.975026	0.425851	-0.213696	1.34619	0.384507	3.04018	0.580243	2.04556	-0.583211	0.228754	0.323692	0.092605	0.700487	-0.306104	3.11517	0.234874	-0.199169	0.016758	0.668841	-0.41151	-1.50989
ENSG00000272861.1	-4.45394	-1.56045	0.0883764	-4.50383	-2.09003	-2.30371	-1.17482	-0.674407	-0.351901	-4.45719	-1.44785	-1.46861	-0.684843	-2.02258	-2.27004	-2.03547	-2.20011	1.11213	-1.75855	-2.25664	-3.5883	-1.46222	-2.31396	-4.14677	-1.60337	-0.602804	-3.25779	-2.26772	-2.2003	-0.987637	-4.01051	-0.491272	-1.87465	-2.02855	-0.818696	-0.751258	-3.93257	-0.93419	-0.566234	-3.25675	-2.15291	-1.36595	-0.763441	-2.11448	-0.908522	-2.68052	-3.46901	-3.3889	-0.284336
ENSG00000273374.1	-3.55716	-4.44127	0	-4.43713	-2.87132	-6.40693	-3.863	-4.1402	-6.04008	-5.56041	-5.68858	-3.57183	-4.1291	-4.44773	-3.18062	-4.46062	-4.18785	-6.34864	-4.63938	0	-4.23209	-5.98048	-7.22454	-3.12071	-3.4842	-4.12106	-2.83745	-4.56359	-5.30352	-4.76893	-3.52877	-1.59449	-4.75548	-2.94414	-6.03739	-3.53255	-5.22843	-4.03741	-4.33242	-4.35997	-5.9931	-6.46917	-5.86666	-2.26351	-5.29185	-3.66827	-3.66534	-3.17019	-3.23001
ENSG00000215386.9	-1.10905	-3.43682	-3.24117	-0.95249	-1.90501	-3.16449	-1.7674	0.920006	-4.42991	-1.29489	1.03429	-1.11366	-3.88977	-8.15948	-3.72245	-0.729437	-1.63427	-0.0214791	-5.57353	0.157202	-4.59593	-5.95527	-1.12251	-4.26131	-0.3886	-0.395414	-4.37233	0.417145	-4.69335	-1.67333	-1.61604	-5.30625	0	-6.2061	-0.726783	-3.98127	-1.60799	-5.0122	-4.62914	0.324875	-1.73523	1.17001	-1.99346	-2.57191	-2.52556	-3.32558	-2.05517	0.810144	-1.06504
ENSG00000272695.1	-2.52572	-3.46512	-3.55326	-1.09563	-4.18735	0.234562	-1.66445	-2.20985	1.55934	-2.96955	-1.20463	-2.07212	-1.34559	-2.57676	-4.22719	-0.976675	-1.22214	-2.17282	-0.53394	-0.701883	-2.15313	0.377939	0.327157	0.588798	-2.92308	-2.60059	-1.25558	-1.83255	1.47434	1.92627	-0.838372	0.0681609	-0.194365	-0.0587568	-2.59092	0.202048	-2.3943	1.71956	0.773017	-0.991502	-1.437	-2.29335	-2.17626	-0.849233	-3.06777	-1.22765	-0.379334	-1.62115	-0.124579
ENSG00000233396.6	-6.10618	-5.21269	-6.47076	-3.34872	-4.74227	-4.1486	-3.53755	-3.17465	-2.65051	-7.10943	-4.97457	-3.46878	-5.00005	-3.53732	-1.92229	-2.68772	-3.18939	-4.57574	-4.99576	-3.68649	-3.43319	-4.30711	-4.60363	-4.79902	-5.84058	-2.08512	-2.00315	-5.335	-3.39311	-5.05492	-3.66276	-4.36591	-4.11186	-1.87344	-3.47094	-2.81854	-1.82992	-4.58643	-3.21848	-3.58707	-4.12709	-3.31776	-6.41569	-2.18177	-5.64823	-2.7478	-2.66183	-1.39729	-2.46709
ENSG00000223685.4	-4.05115	-3.42069	0	-3.10104	-5.2722	-3.57899	-2.35699	-2.53465	-2.11904	-0.594966	-2.41703	-4.28821	-3.72262	-4.35675	-4.08965	-3.95461	-2.29482	-1.93574	-3.13337	-3.11688	-3.18551	-3.05943	-3.13356	-2.42205	-4.78554	-4.20001	-4.855	-4.27997	-5.79751	-3.58485	-2.4378	-3.57391	-6.05682	-3.33625	-1.79442	-1.474	-3.94481	-6.11636	-4.08944	-2.269	-4.07205	-3.96316	0	-4.71169	-2.89276	-2.16225	-2.74429	-2.07922	-1.99702
ENSG00000197291.7	-2.34449	-1.47206	0	-2.59602	-3.62967	-3.5479	-2.115	-3.50356	-4.02905	-0.917106	-5.15148	-1.10512	-5.17696	-3.85173	-0.377772	-3.77152	-0.824149	-5.07457	-4.05719	-5.25572	-3.68049	-4.4169	-4.2875	-0.747105	-0.392993	-1.76899	-2.38651	-4.68184	-5.29249	-6.40175	-0.591737	-0.770227	-5.28877	-3.96873	-2.7238	-5.16537	-1.11786	-3.47384	-4.90635	-3.27855	-4.42952	1.08412	-3.3702	0.108027	-3.50321	-3.35767	-4.07577	-0.335408	-1.31143
ENSG00000273008.1	-3.81924	-6.09567	0	-4.4541	-4.04029	-5.25397	-4.29501	-5.7946	-2.38463	-3.6001	-5.27259	-2.52579	-2.49072	-5.29477	-1.89838	-3.30767	-3.41341	-2.49524	-5.29377	-2.98451	-2.73121	-3.09055	-2.54802	-3.77511	-2.81667	-4.55307	-2.74862	-2.13052	-1.90264	-2.13054	-3.63885	-2.00096	-2.82492	-2.01946	-3.14747	-2.37959	-3.29787	-3.46942	-3.06398	-2.88509	-4.4251	-3.50886	-2.12874	-2.47978	-2.36129	-2.40839	-2.71884	-3.33916	-3.02815
ENSG00000182057.4	-2.88631	-2.71529	-2.25089	-1.35125	-2.47934	-0.523088	-1.84423	-0.758859	0.109929	-0.304601	-0.609268	-0.309792	-2.30102	0.223119	-0.325351	-2.24921	-0.94896	-1.04976	-1.48043	-0.689015	-0.0538461	-1.76906	-0.620805	-0.438666	-2.08014	-1.40715	-0.17232	-0.54482	-0.310749	-1.23559	-2.09496	0.113347	-2.44453	-0.446427	-1.65606	0.279767	-1.39811	-0.00156851	-0.38404	-0.448119	-1.11872	-0.170298	0	-1.75836	-0.229581	-0.484867	-1.11289	-0.60828	-0.176143
ENSG00000259884.1	-2.51062	-0.728156	0.669128	-2.92308	0	-0.070878	-0.526951	-1.11674	-2.16347	0.638137	-1.43345	0	-4.15937	-1.40118	-1.44602	-2.58401	-0.726274	-5.47202	-2.40019	-4.0682	-1.35548	0	-4.76296	-2.91394	0.108627	-3.24444	-2.4844	-0.54013	-2.42691	1.40047	-5.23712	-3.2033	-5.68622	0.0506544	0.663652	-1.3929	-0.25228	-4.16079	-1.79284	-0.354072	-0.531519	-5.59256	-3.99004	0	-1.90066	0	-3.69562	-4.6155	-3.88945
ENSG00000272417.1	-2.62755	-4.31902	0	-2.67744	-4.8486	-2.47732	-1.93339	-2.43298	-3.11047	0	0	0	-3.52142	-2.19619	-2.08108	-2.53101	-2.95868	-2.83407	-1.93216	-2.43025	-2.76191	-3.63583	-1.70996	-5.32038	-3.36194	-3.77641	-3.4314	-4.44133	0	-2.57628	-2.59916	-0.150309	-2.04826	-3.37209	-2.37082	-4.50983	-2.10618	-1.88541	-1.66584	-2.10843	-3.64845	-1.21764	-2.93705	-1.11817	-1.99967	-2.85413	-1.05766	-1.39258	-2.35103
ENSG00000242375.1	-3.73166	-0.516237	-0.774305	-1.78155	-0.782785	-1.12199	0	-1.03459	-2.21458	-1.56498	-2.37765	-0.0942531	-0.751057	-0.715334	-3.77016	-0.934681	-1.89287	0.521255	-0.813874	-3.11932	-0.959132	-0.652475	-1.39903	-0.215037	1.48815	-3.88052	-4.53551	-1.54544	-1.47802	-0.680393	-0.0403036	-0.669455	-0.737334	-2.47619	-0.626929	-2.29201	0.313276	0.560681	-1.00442	0.594812	-1.9452	0.565781	-0.34072	-0.485311	-1.81427	-2.95824	-0.939376	-1.34469	-1.3556
ENSG00000277151.1	-5.89412	-3.44809	-4.2587	-3.74239	-3.22765	-5.74389	-3.78493	-3.28452	-5.96201	-4.63434	-4.96896	-6.03808	-4.17132	-4.64719	-4.31595	-3.7272	-4.45972	-3.61522	-3.46177	-4.01875	-5.18049	-4.63937	-4.35987	-3.95469	-4.36548	-4.77995	-4.0199	-5.44487	-4.79249	-4.29032	-3.07219	-4.89081	-3.82941	-4.37563	-5.69629	-4.01087	-5.37275	-5.28126	-5.76892	-3.37501	-3.98903	-4.42763	-7.52555	-3.12171	-5.43617	-5.70567	-3.9092	-3.90308	-4.16192
ENSG00000275703.1	-2.69154	-3.38301	-0.596681	-4.74143	-2.91259	-2.21938	-2.58234	-3.08193	-2.75942	-3.69479	-3.14488	0	-2.58541	-1.77475	-5.315	-2.595	-4.02267	-3.48302	-4.58111	-3.0792	-3.24094	-2.37789	-4.35891	-3.79941	-2.42593	-2.25544	-2.91043	-3.50532	-2.4379	-4.22523	-2.66315	-2.95126	-1.37529	0	0	-2.57382	-2.17017	-3.17179	-4.05176	-1.687	-2.71244	-2.60355	-2.41608	-3.35208	-2.91166	-2.91812	-1.38468	-1.81914	-3.22237
ENSG00000274370.1	0.602497	1.61998	4.46526	0.829441	-2.73403	1.26174	0.792614	-0.581445	-3.16583	-0.0567975	-0.597093	-0.91997	-0.0532121	-0.596192	-2.39948	0.424859	-2.42908	0.695538	-2.18016	1.34728	-3.23231	-0.784296	2.06757	0.163421	-1.24737	-0.339917	0.346131	-1.10437	-1.67438	-0.824286	0.152838	-1.4832	-2.29626	-0.755017	-0.519283	-1.52079	-1.57657	-2.3558	-1.06585	0.622806	-0.031382	-0.00995801	0.592555	-0.173525	-1.31806	0.997402	0.0162669	-0.0329023	-0.499496
ENSG00000273100.1	-4.77955	-3.88606	-0.189931	-4.82945	-2.54117	-2.62932	-4.08539	-3.16995	-1.20358	-5.7828	-3.2329	-4.01662	-2.45103	-2.67012	-4.08108	-2.36109	-3.52572	-2.98607	0	-5.16721	-3.91392	-4.78783	-4.125	-4.47238	-3.51395	-2.60649	-5.58341	-3.00837	-2.71856	-0.31325	-2.75116	-2.03928	-2.6153	-2.35416	-3.84475	-1.57437	-4.25818	-4.2598	-1.43933	-2.41244	-2.9931	-1.78468	-2.2817	-5.4401	-3.99967	-2.26917	-3.79463	-5.71451	-3.31039
ENSG00000260855.1	-6.60447	0	-7.96904	-4.84701	-4.12508	-5.86927	-7.49527	-7.99486	0	-6.02275	0	-5.42649	-5.76137	-4.49503	-3.09864	-2.64995	-7.9356	-5.81098	-4.49404	-5.99213	-4.4169	-1.42292	-4.81241	-5.97537	-2.09093	0	-6.40832	-5.83329	-4.35083	-7.13816	-4.57608	-5.86419	-6.02518	-3.95668	-4.86231	-4.90178	-2.35517	0	-4.26425	-6.40728	-5.30344	0	0	-2.17755	-4.44607	-5.09408	-5.03458	-4.07999	-3.74298
ENSG00000236423.4	-3.30804	-2.47867	-3.87425	-4.71157	-6.46769	-3.98093	-3.02196	-3.63703	-3.9926	-3.02749	-3.76138	-2.3317	-5.9885	-3.81528	-5.8701	-3.2115	-3.7033	0	-5.39924	-0.86171	-3.79604	-3.51795	-3.25105	-2.33461	-4.98103	-1.58815	-4.46553	-2.55792	-4.993	-2.23601	-5.38817	-2.58882	-1.79288	-3.40621	-3.14191	-2.54396	-4.50287	-4.57488	-3.94389	-2.87952	-2.8983	-3.93626	-3.23421	-1.36286	-3.72979	-2.28559	-4.03932	-3.30713	-3.71858
ENSG00000224635.1	-3.81158	-3.6957	-5.17616	-2.27651	-7.03263	-3.07639	-0.771647	-7.20197	-2.23561	-4.4929	-0.889889	-2.04865	-4.29041	-3.24272	-1.39065	-2.19148	-1.01343	0	-4.37922	-1.44436	-3.94595	-4.01251	-3.15703	-3.59752	-1.54597	-3.37548	-5.03047	-3.45544	-3.38802	-2.88585	-3.19823	-1.56881	-2.35783	-0.172414	-4.29182	-3.37193	-3.20275	-1.70687	-4.84988	-3.44447	-1.34063	-4.40167	-3.31373	0.677622	-4.35363	-3.03816	-0.504726	-0.146628	-5.02049
ENSG00000268388.4	0	-3.5642	-7.35278	-4.62307	-5.98687	-5.42294	-4.65662	-4.3786	-4.47113	-5.4065	-3.41181	-5.22527	-4.80408	-1.533	-4.67307	-5.0172	-1.73438	-5.19473	-4.14082	-6.96083	-4.70754	-6.99649	-3.43319	-3.24364	-0.848133	-5.40011	-6.79206	-7.38696	-2.8601	-4.10687	-4.04228	-4.61051	-4.33092	-4.67385	-6.31644	-6.45545	-2.31033	-4.83103	-6.61147	-1.93304	-5.78672	-4.5783	-6.29771	-5.91179	-4.47136	-4.92529	-6.00328	-5.70078	-2.78208
ENSG00000230537.1	-1.60668	-2.39769	-2.55622	-5.56347	-1.82773	-3.04141	-2.81941	-0.618561	-3.58146	0	-5.96692	-0.94328	-1.67047	-3.81917	-2.8151	-3.41703	-2.38527	-1.39816	-2.81818	-0.200793	-2.84058	-3.93689	-2.01102	-3.03648	-1.92604	-2.66244	-1.73246	-4.32735	-4.25993	-1.04727	-2.74822	-3.35826	-0.995685	-3.08818	-2.9938	-3.81089	-3.40724	-3.57878	-3.28883	-5.31638	-2.53447	-2.10366	-1.82307	-2.85219	-3.73369	-5.32512	-4.52864	-3.44853	-5.04441
ENSG00000227619.1	2.20517	-1.30051	-0.941904	0.292157	-5.32194	-1.49123	0.330234	-1.30146	-3.84685	2.58061	-0.984383	-1.04028	-1.13678	-1.1841	-3.81746	2.20753	-1.62467	-2.03439	-2.66854	5.35183	-2.37728	-4.78724	-0.973852	-1.13551	-3.51336	1.09897	-2.58282	-5.91468	-2.14681	-3.17516	-3.85011	-4.13822	0.572912	-4.6755	-0.0575635	-4.98317	-0.460579	-6.1661	-4.87615	-1.02106	-2.12179	-2.15493	-2.60304	-3.17647	1.94578	1.12648	-3.79404	-2.78792	1.36827
ENSG00000274902.1	0.00652626	-2.3288	-1.09501	-2.10226	-2.85838	-0.679743	-2.20621	-1.7058	-2.70522	-1.47065	-1.63125	-0.874395	-2.5312	-1.5279	-1.45344	-1.95583	-1.3835	0	-3.5269	-1.02499	-2.18673	-3.64561	-1.71974	-1.62972	-1.04979	-1.7862	-1.44118	-1.12919	-2.38369	-1.36367	-2.1939	-1.89706	-1.47308	-3.38187	-4.70253	0	-2.79403	-3.70254	-2.99755	-2.44014	-1.65823	-0.74199	0.140631	-1.97595	-2.17938	-1.12695	-0.845048	-2.98733	-2.36081
ENSG00000230366.8	-3.9281	-6.42693	-1.26714	-4.46342	-3.25607	-6.58522	-4.62626	-4.54089	-5.21838	-5.15374	-4.38145	-3.55748	-2.57043	-3.81867	-3.77396	-3.05396	-4.74466	-4.20501	-4.04007	-6.12312	-4.28486	-5.74374	-4.08091	-4.42829	-2.88489	-4.88432	-3.73196	0	-3.48182	-2.80972	-6.29203	-2.41022	-5.74113	-3.89503	-2.71319	-6.61774	-3.89216	-3.47874	-3.92575	-4.21634	-4.43443	-2.12391	-4.04496	-4.07407	-3.47015	-4.96204	-3.75053	-4.34849	-5.26629
ENSG00000273487.1	0	-4.28593	-6.544	-3.90739	0	-6.02919	-6.07022	-3.98485	0	0	-3.17334	-4.00145	0	0	-5.21792	-3.76096	-6.51056	-4.9709	0	-4.56708	-3.50643	-6.1877	-6.8468	-2.87225	-3.32885	-5.32829	-3.98327	-5.9932	0	0	-4.73599	-5.02411	-5.1851	-4.60203	-6.24462	-6.0617	0	-4.65967	0	-2.07534	-4.61536	-5.09144	-3.48892	0	-4.72147	-2.82104	-2.38714	-4.11438	-5.71026
ENSG00000228251.1	0	-1.25958	-2.93269	-2.93993	-2.78916	-1.03937	-3.19588	-2.28043	-1.25749	-3.30832	-2.75842	-1.25263	-2.36887	-0.780605	-0.469105	-2.47157	-2.05125	-0.98108	-1.60969	-1.69274	-2.70247	-2.09096	-1.46995	-1.99791	-2.03947	-4.0389	-0.886537	-1.38189	-1.31447	-1.25381	-1.63926	-1.03429	-0.503397	-3.31265	-1.4958	-1.31289	-2.19874	-0.955252	-1.79083	-2.37092	-2.10359	-1.48013	-1.87761	-1.09115	-1.43208	-1.37966	-1.58318	-2.24004	-1.17295
ENSG00000233967.5	0.0956183	2.27627	-1.26896	-1.67417	-0.803506	-1.75415	-0.558146	-2.10213	-2.97227	-0.393058	-1.16508	-2.72641	-1.73114	-1.01734	-1.52784	-0.70831	-2.45791	-2.18129	-1.69442	-1.51444	-2.03875	-2.39809	-2.91968	-2.40457	-0.198202	-0.105714	-1.81515	-1.71817	-1.75766	-0.923506	-0.0983854	-2.09699	-2.91006	-1.09872	-0.104508	-2.13459	-4.19037	-2.77695	-1.07196	-1.12223	-1.34032	-0.868864	-2.43628	-2.56493	0.086067	0.0616797	-1.47888	-1.12313	-1.24257
ENSG00000273796.1	-3.97477	-2.34431	-0.947029	-1.02467	-3.19582	-2.23958	-1.40614	0.126689	-0.0426583	-0.0238237	-1.84316	-0.0419109	0.100986	-2.28038	-1.42831	-1.29327	-0.782344	0.481675	-1.69442	-2.77747	-1.30178	-0.735125	-1.47222	-2.49768	1.04572	-0.423196	-1.97127	1.86966	0.0862207	-1.04904	0.27601	-2.0121	-1.07356	-0.509855	-1.87004	-1.0497	-0.095848	-0.396128	-0.875562	1.61473	-0.825748	-2.30182	1.07328	-1.17588	-1.60993	-2.20135	-1.08295	-1.20929	-2.69825
ENSG00000265055.1	-0.939282	-1.70876	1.33086	-2.91518	-2.23834	-0.0369776	-1.75609	-1.05404	-3.2551	-1.3831	-2.05559	-0.102347	-1.34411	-2.27042	-3.81067	-1.18378	-0.160793	-1.39373	0.315535	-1.76752	-2.51422	-1.87356	0.295161	-0.420611	-1.33664	-1.01415	0	-0.357138	0.710283	-0.39898	-1.15882	-1.44694	-0.944959	-0.931747	-1.66744	0.356773	-1.20641	-0.345533	-1.64054	-1.8201	-0.748681	0.515484	0.86084	-0.940864	0.103634	-0.413794	-1.74285	-3.12217	-2.39612
ENSG00000264964.1	-2.12214	0.555626	0	-0.587071	-1.92815	1.37387	-0.012941	-0.0530993	-0.453059	-0.902994	-3.16045	-0.13681	-1.48549	-2.27574	0.161292	-0.910124	-1.86831	0.85897	-1.42675	-0.5098	-2.03411	-3.71538	0.432878	-1.07801	-0.856531	0.31396	0	-0.433422	1.03839	-1.43344	0.543681	0.492606	-1.12781	-1.36417	-1.60237	1.45501	-0.662167	-0.128458	1.02014	-1.33999	-0.728002	0.287775	0	-1.56029	0.335816	-1.05921	-2.13721	-1.64206	0.594953
ENSG00000224790.1	-3.6177	0	-0.982276	-2.34567	-2.83875	-3.46747	-3.5085	-5.00809	-2.68559	-1.8136	-3.48609	-1.85477	-4.09653	-1.70091	-2.6562	-3.52116	-1.77891	-2.40918	-3.50727	-2.00536	-1.94471	-1.45606	-2.47772	-1.98861	-1.03017	-2.1816	-3.42155	-1.62413	-4.36406	0	0	-2.14046	-1.81602	-1.77728	-1.36097	-2.91502	-2.51137	-0.290597	-4.97792	-2.09859	-1.46868	0	-0.467772	-1.27825	-2.35239	0	-4.63277	-1.74531	-2.82661
ENSG00000271914.1	-1.88731	-0.841813	0	-2.9372	-2.3714	-1.51468	-0.193149	-2.86266	-2.9552	-2.15359	-1.92562	-0.97237	-1.04421	-2.36284	-0.6363	-1.20581	-3.80341	-1.94182	-3.36184	-3.85993	-1.79928	-1.48055	-1.23276	-1.84318	-0.884736	-0.451211	-0.954196	-1.4787	-2.21863	-4.00597	-2.02884	-0.316959	-1.15602	-2.04688	-1.21554	-1.76959	-2.62897	-2.21556	-1.83249	-0.368193	-1.90821	-2.06236	-1.45984	-0.673384	-1.69239	-2.28382	0.641939	-1.0853	-2.68118
ENSG00000229891.1	0	-5.84158	0.3182	1.14872	-2.91174	-1.1419	-1.34048	-0.114243	-1.82568	-0.727099	0.440932	-0.357432	-1.92851	0.368709	-0.188613	-1.40972	1.8763	2.47203	-1.39583	-0.493384	-1.03655	-0.377036	0.311792	-0.842948	0.896852	1.22458	4.08632	2.67273	1.57113	0.016627	-0.577406	-2.9948	0.844209	0.0242113	-1.21531	-2.0324	-1.49946	-1.63037	-2.05091	0.747512	1.7715	-0.740202	-2.13769	1.54689	0.994339	-0.604109	0.419774	1.29863	-0.471498
ENSG00000235159.1	0	-4.29427	-2.64545	-4.6527	-3.0165	-1.64521	-3.90864	-3.40823	-3.08573	-3.28412	-2.88622	-3.83987	0	-2.68601	-1.83395	-2.69891	-4.34897	-3.80932	-2.90741	-3.4055	-4.1522	-4.02612	-1.68522	-3.29564	-2.3372	-2.1667	-0.821693	-3.83162	-2.34917	-1.32915	-4.15938	-1.86253	-4.02352	-2.53998	-1.86064	-1.90012	-4.49647	-1.76113	-2.7931	-2.23569	-4.03874	-0.870961	-2.59038	-3.26335	-3.14485	-2.82939	-2.29595	-3.9528	-1.74132
ENSG00000278002.1	-0.46814	-3.30257	-1.75328	-4.24596	-3.41711	-3.23847	-3.27951	-5.00149	-6.26395	-4.61435	-2.56195	-2.69616	-4.08993	-4.50167	-1.86533	-3.29217	-3.35727	-4.98754	-4.08563	-3.58372	-3.52307	0	-3.163	-3.42946	0	-2.75996	-2.19256	-3.68792	-2.48299	-5.72976	-3.16767	-2.45579	-3.61677	-3.35564	-2.35437	-2.75641	-2.97425	-6.26127	-4.55628	-2.67695	-3.21696	-4.10808	-3.9206	-3.04925	-2.15314	-3.42264	-3.40378	-4.13102	-4.40497
ENSG00000272024.1	-1.5118	-0.618307	0	-2.56169	0	-0.554212	-1.81764	-1.90219	-1.77233	-1.70769	-1.38018	-1.1639	-2.6687	-1.8174	-0.13526	-2.41526	-2.25797	-0.602841	-0.816409	-1.57753	-3.64616	-2.19815	-2.00925	-2.03471	-2.24619	-0.853309	0.143779	-1.00366	-1.6732	0	-1.48341	-0.186562	0	-1.67137	-2.25507	-2.39408	-1.08354	-2.99205	-1.7021	-1.14469	-0.625811	-0.423814	1.03668	-1.85042	-1.35341	-0.51599	-3.52687	-0.987327	-1.72071
ENSG00000226856.4	-4.19312	-3.88459	-0.235764	-2.82797	-5.99913	-0.927407	-2.34695	-2.08101	-2.84597	-3.4594	0	-3.60011	0.971908	-3.66865	-0.646653	-2.51162	-2.52425	-2.76221	-5.66765	-3.58078	-5.91244	-2.32693	-4.12353	0.573482	-1.92751	-3.92694	-0.723952	-2.42194	-1.61755	-5.31178	-3.33465	-3.62277	-4.78376	-3.71526	-4.25831	-0.450907	-3.08678	-0.843293	-3.33095	-4.58089	-2.79898	-1.98965	-2.76565	-2.1167	-1.67627	-3.58963	-2.62323	-4.12808	-2.22145
ENSG00000232229.4	-1.71379	-4.59508	-0.901863	-3.49407	-4.31731	-4.43145	-2.93643	-1.13413	-1.76204	-1.46392	-2.16713	-3.47771	-4.38244	-3.54625	-1.21419	-0.667522	-0.719045	-6.69509	-3.79318	-3.12135	-2.61171	-3.74197	-3.8161	-3.78909	-1.55054	-2.35204	-1.90011	-4.54747	-2.69578	-2.07976	-1.05079	-4.04786	-4.58736	-1.72928	-0.445245	-3.46396	-1.89039	-0.692699	-0.350943	-0.526514	-1.15633	-0.73881	-1.08383	-4.97919	-1.65124	-3.54523	-4.01179	-1.48102	-1.31551
[truncated: 566 more rows]
[truncated: 250 more columns]
