# Supplementary material for: LncRNAs specifically overexpressed in endocervical adenocarcinoma are associated with an unfavorable recurrence prognosis and the immune response
Source: PeerJ. 2021 Sep 21;9:e12116. doi: 10.7717/peerj.12116 (PMC8462375; doi:10.7717/peerj.12116)
Supplement: Supplemental Information 5 [file peerj-09-12116-s005.xlsx]

## Sheet: Sheet1
The names of the LncRNAs and antisense RNAs
Fig2A		Fig2B		Fig2C		Fig2D		Fig2E		Fig2F
ENSG00000272764		ENSG00000261136		ENSG00000272905		ENSG00000196167		ENSG00000251615		ENSG00000273055
ENSG00000271888		ENSG00000272273		ENSG00000258279		ENSG00000235204		ENSG00000206344		ENSG00000268895
ENSG00000257084		ENSG00000226312		ENSG00000275223		ENSG00000251455		ENSG00000277287		ENSG00000261663
ENSG00000280587		ENSG00000278899		ENSG00000274292		ENSG00000233452		ENSG00000230615		ENSG00000280007
ENSG00000163009		ENSG00000205790		ENSG00000272970		ENSG00000197815		ENSG00000278107		ENSG00000259248
ENSG00000275484		ENSG00000260213		ENSG00000246465		ENSG00000269984		ENSG00000261229		ENSG00000267080
ENSG00000274818		ENSG00000275880		ENSG00000234917		ENSG00000267394		ENSG00000273723		ENSG00000239523
ENSG00000251259		ENSG00000267251		ENSG00000263004		ENSG00000272263		ENSG00000263126		ENSG00000117242
ENSG00000271151		ENSG00000244968		ENSG00000245750		ENSG00000255507		ENSG00000259673		ENSG00000225439
ENSG00000272707		ENSG00000253549		ENSG00000245017		ENSG00000231651		ENSG00000237424		ENSG00000270344
ENSG00000268751		ENSG00000245648		ENSG00000231742		ENSG00000250220		ENSG00000226380		ENSG00000280195
ENSG00000224259		ENSG00000256262		ENSG00000272791		ENSG00000273176		ENSG00000272375		ENSG00000237883
ENSG00000262877		ENSG00000254854		ENSG00000276855		ENSG00000249684		ENSG00000251432		ENSG00000238058
ENSG00000163364		ENSG00000260589		ENSG00000180861		ENSG00000256234		ENSG00000273015		ENSG00000259172
ENSG00000261008		ENSG00000231999		ENSG00000271755		ENSG00000240005		ENSG00000260804		ENSG00000255568
ENSG00000268027		ENSG00000227495		ENSG00000259915		ENSG00000259287		ENSG00000250742		ENSG00000259523
ENSG00000273669		ENSG00000267199		ENSG00000273399		ENSG00000258325		ENSG00000238142		ENSG00000253930
ENSG00000278921		ENSG00000235790		ENSG00000238005		ENSG00000237886		ENSG00000221949		ENSG00000259408
ENSG00000226091		ENSG00000242396		ENSG00000259275		ENSG00000223653		ENSG00000243819		ENSG00000262903
ENSG00000226853		ENSG00000273174		ENSG00000281357		ENSG00000224020		ENSG00000272156		ENSG00000266962
ENSG00000268628		ENSG00000258384		ENSG00000238121		ENSG00000228839		ENSG00000226791		ENSG00000250365
ENSG00000256576		ENSG00000240401		ENSG00000260646		ENSG00000272625		ENSG00000269473		ENSG00000244184
ENSG00000245164		ENSG00000255100		ENSG00000270019		ENSG00000226944		ENSG00000261512		ENSG00000230082
ENSG00000270419		ENSG00000275454		ENSG00000222033		ENSG00000243224		ENSG00000273576		ENSG00000230424
ENSG00000269888		ENSG00000273888		ENSG00000260118		ENSG00000275645		ENSG00000261824		ENSG00000273247
ENSG00000279278		ENSG00000233038		ENSG00000268129		ENSG00000233330		ENSG00000260418		ENSG00000259943
ENSG00000280721		ENSG00000229950		ENSG00000236882		ENSG00000235527		ENSG00000272800		ENSG00000259456
		ENSG00000233885		ENSG00000187013		ENSG00000272072		ENSG00000234432		ENSG00000237054
		ENSG00000261879		ENSG00000273381		ENSG00000272123		ENSG00000273821		ENSG00000235423
		ENSG00000266993		ENSG00000256742		ENSG00000229728		ENSG00000188825		ENSG00000267801
		ENSG00000268204		ENSG00000259687		ENSG00000261441		ENSG00000257556		ENSG00000233203
		ENSG00000225721		ENSG00000253704		ENSG00000258813		ENSG00000272010		ENSG00000259642
		ENSG00000254910		ENSG00000231473		ENSG00000224805		ENSG00000255284		ENSG00000232442
		ENSG00000253741		ENSG00000272217		ENSG00000243368		ENSG00000245156		ENSG00000250802
		ENSG00000229953		ENSG00000273264		ENSG00000270574		ENSG00000205791		ENSG00000222020
		ENSG00000226377		ENSG00000246640		ENSG00000238186		ENSG00000273472		ENSG00000271335
		ENSG00000273199		ENSG00000154537		ENSG00000231407		ENSG00000271737		ENSG00000236540
		ENSG00000204706		ENSG00000248243		ENSG00000231993		ENSG00000253522		ENSG00000269821
		ENSG00000276261		ENSG00000230606		ENSG00000272256		ENSG00000273344		ENSG00000177640
		ENSG00000260367		ENSG00000258884		ENSG00000231563		ENSG00000281912		ENSG00000255237
		ENSG00000230148		ENSG00000227373		ENSG00000228452		ENSG00000273437		ENSG00000228109
				ENSG00000257660		ENSG00000248554		ENSG00000272308		ENSG00000269293
				ENSG00000271966		ENSG00000257052		ENSG00000235072		ENSG00000267892
				ENSG00000232774		ENSG00000279833		ENSG00000263731		ENSG00000272572
				ENSG00000277159		ENSG00000253582		ENSG00000245522		ENSG00000221990
				ENSG00000227388		ENSG00000273254		ENSG00000272087		ENSG00000234684
				ENSG00000250508		ENSG00000234478		ENSG00000269893		ENSG00000266208
				ENSG00000274422		ENSG00000271795		ENSG00000272913		ENSG00000272323
				ENSG00000266651		ENSG00000203288		ENSG00000272994		ENSG00000277283
				ENSG00000277144		ENSG00000272768		ENSG00000278730		ENSG00000214401
				ENSG00000266970		ENSG00000230155		ENSG00000224950		ENSG00000260442
				ENSG00000275897		ENSG00000272825		ENSG00000261159		ENSG00000227540
				ENSG00000250303		ENSG00000278156		ENSG00000255121		ENSG00000273306
				ENSG00000277459		ENSG00000255559		ENSG00000242474		ENSG00000270049
				ENSG00000235499		ENSG00000230479		ENSG00000227946		ENSG00000259426
				ENSG00000180279		ENSG00000279529		ENSG00000260805		ENSG00000270006
				ENSG00000268362		ENSG00000267254		ENSG00000260778		ENSG00000244479
				ENSG00000271983		ENSG00000267523		ENSG00000269973		ENSG00000273002
				ENSG00000272138		ENSG00000259088		ENSG00000261474		ENSG00000177337
				ENSG00000270557		ENSG00000270589		ENSG00000275964		ENSG00000177406
				ENSG00000235576		ENSG00000261207		ENSG00000272654		ENSG00000272277
				ENSG00000260698		ENSG00000260830		ENSG00000274104		ENSG00000257167
				ENSG00000269946		ENSG00000276026		ENSG00000245975		ENSG00000260526
				ENSG00000271553		ENSG00000250602		ENSG00000240859		ENSG00000267309
				ENSG00000279873		ENSG00000237836		ENSG00000264278		ENSG00000258057
				ENSG00000272102		ENSG00000238133		ENSG00000272525		ENSG00000264235
				ENSG00000229178		ENSG00000233547		ENSG00000224616		ENSG00000254682
				ENSG00000245685		ENSG00000232934		ENSG00000281398		ENSG00000263072
				ENSG00000271868		ENSG00000223343		ENSG00000225880		ENSG00000239213
				ENSG00000232104		ENSG00000266010		ENSG00000253948		ENSG00000272677
				ENSG00000272416		ENSG00000232973		ENSG00000250899		ENSG00000258944
				ENSG00000214894		ENSG00000273010		ENSG00000274925		ENSG00000272106
				ENSG00000242516		ENSG00000224138		ENSG00000225285		ENSG00000251022
				ENSG00000260360		ENSG00000226754		ENSG00000270039		ENSG00000235531
				ENSG00000281538		ENSG00000251330		ENSG00000243701		ENSG00000263766
				ENSG00000259772		ENSG00000226711		ENSG00000273033		ENSG00000235652
				ENSG00000280924		ENSG00000267277		ENSG00000178977		ENSG00000261183
				ENSG00000268798		ENSG00000229267		ENSG00000281649		ENSG00000244300
				ENSG00000273181		ENSG00000262136		ENSG00000256092		ENSG00000275457
				ENSG00000277692		ENSG00000225806		ENSG00000274605		ENSG00000272669
				ENSG00000259807		ENSG00000274987		ENSG00000226029		ENSG00000234290
				ENSG00000260430		ENSG00000273210		ENSG00000247095		ENSG00000261505
				ENSG00000272097		ENSG00000230084		ENSG00000272894		ENSG00000256690
				ENSG00000277559		ENSG00000226352		ENSG00000273192		ENSG00000231856
				ENSG00000244733		ENSG00000225756		ENSG00000234546		ENSG00000244879
				ENSG00000214146		ENSG00000224965		ENSG00000272168		ENSG00000223482
				ENSG00000262228		ENSG00000228302		ENSG00000203709		ENSG00000232533
				ENSG00000228037		ENSG00000276663		ENSG00000272777		ENSG00000203993
				ENSG00000213057		ENSG00000237938		ENSG00000261526		ENSG00000237945
				ENSG00000178440		ENSG00000277496		ENSG00000259577		ENSG00000225377
				ENSG00000279141		ENSG00000185837		ENSG00000260423		ENSG00000260063
				ENSG00000269961		ENSG00000230163		ENSG00000242622		ENSG00000232648
				ENSG00000274341		ENSG00000260593		ENSG00000272086		ENSG00000263272
				ENSG00000242553		ENSG00000257270		ENSG00000228434		ENSG00000234222
				ENSG00000262370		ENSG00000267565		ENSG00000263050		ENSG00000268858
				ENSG00000239467		ENSG00000265943		ENSG00000228784		ENSG00000251661
				ENSG00000277423		ENSG00000273402		ENSG00000246067		ENSG00000272686
				ENSG00000269947		ENSG00000257913		ENSG00000276564		ENSG00000259319
				ENSG00000246523		ENSG00000271993		ENSG00000277969		ENSG00000271918
				ENSG00000261211		ENSG00000275549		ENSG00000281005		ENSG00000249348
				ENSG00000251580		ENSG00000233178		ENSG00000277013		ENSG00000278383
				ENSG00000272861		ENSG00000250091		ENSG00000273142		ENSG00000254473
				ENSG00000273374		ENSG00000275710		ENSG00000267414		ENSG00000269352
				ENSG00000215386		ENSG00000227214		ENSG00000272077		ENSG00000225335
				ENSG00000272695		ENSG00000232284		ENSG00000273448		ENSG00000224046
				ENSG00000233396		ENSG00000273261		ENSG00000224032		ENSG00000227741
				ENSG00000223685		ENSG00000228350		ENSG00000273265		ENSG00000277978
				ENSG00000197291		ENSG00000249532		ENSG00000273156		ENSG00000272668
				ENSG00000273008		ENSG00000227110		ENSG00000270012		ENSG00000204860
				ENSG00000182057		ENSG00000205890		ENSG00000235314		ENSG00000261485
				ENSG00000259884		ENSG00000231806		ENSG00000251417		ENSG00000273151
				ENSG00000272417		ENSG00000253392		ENSG00000277369		ENSG00000258824
				ENSG00000242375		ENSG00000229739		ENSG00000267575		ENSG00000256628
				ENSG00000277151		ENSG00000225778		ENSG00000259820		ENSG00000267980
				ENSG00000275703		ENSG00000259536		ENSG00000228889		ENSG00000245614
				ENSG00000274370		ENSG00000268366		ENSG00000272335		ENSG00000271270
				ENSG00000273100		ENSG00000232912		ENSG00000233903		ENSG00000268516
				ENSG00000260855		ENSG00000234705		ENSG00000261098		ENSG00000237181
				ENSG00000236423		ENSG00000232940		ENSG00000261126		ENSG00000259802
				ENSG00000224635		ENSG00000232352		ENSG00000188004		ENSG00000229852
				ENSG00000268388		ENSG00000245534		ENSG00000276728		ENSG00000226833
				ENSG00000230537		ENSG00000225450		ENSG00000276698		ENSG00000240207
				ENSG00000227619		ENSG00000272037		ENSG00000231327		ENSG00000272870
				ENSG00000274902		ENSG00000236404		ENSG00000232931		ENSG00000255737
				ENSG00000230366		ENSG00000247675		ENSG00000232611		ENSG00000266036
				ENSG00000273487		ENSG00000238287		ENSG00000278376		ENSG00000267871
				ENSG00000228251		ENSG00000233058		ENSG00000251562		ENSG00000266680
				ENSG00000233967		ENSG00000251867		ENSG00000225791		ENSG00000271895
				ENSG00000273796		ENSG00000278811		ENSG00000205853		ENSG00000259146
				ENSG00000265055		ENSG00000257740		ENSG00000182648		ENSG00000215256
				ENSG00000264964		ENSG00000230319		ENSG00000272692		ENSG00000255306
				ENSG00000224790		ENSG00000272509		ENSG00000234608		ENSG00000224738
				ENSG00000271914		ENSG00000273523		ENSG00000264247		ENSG00000267265
				ENSG00000229891		ENSG00000239791		ENSG00000274825		ENSG00000271913
				ENSG00000235159		ENSG00000251141		ENSG00000237310		ENSG00000253738
				ENSG00000278002		ENSG00000231050		ENSG00000272720		ENSG00000247903
				ENSG00000272024		ENSG00000267077		ENSG00000247373		ENSG00000267698
				ENSG00000226856		ENSG00000264745		ENSG00000206567		ENSG00000227258
				ENSG00000232229		ENSG00000233101		ENSG00000260807		ENSG00000247121
				ENSG00000272787		ENSG00000271155		ENSG00000272468		ENSG00000272760
				ENSG00000260259		ENSG00000271857		ENSG00000259865		ENSG00000226419
				ENSG00000274184		ENSG00000224195		ENSG00000214548		ENSG00000269318
				ENSG00000277142		ENSG00000204055		ENSG00000273145		ENSG00000225205
				ENSG00000231528		ENSG00000226800		ENSG00000270001		ENSG00000272909
				ENSG00000244649		ENSG00000245498		ENSG00000261220		ENSG00000264577
				ENSG00000278344		ENSG00000272146		ENSG00000273243		ENSG00000231177
				ENSG00000272663		ENSG00000273369		ENSG00000267002		ENSG00000260095
				ENSG00000262454		ENSG00000224272		ENSG00000273148		ENSG00000245970
				ENSG00000260911		ENSG00000257176		ENSG00000272275		ENSG00000250616
				ENSG00000267547		ENSG00000261723		ENSG00000230733		ENSG00000206573
				ENSG00000205959		ENSG00000205930		ENSG00000228223		ENSG00000228172
				ENSG00000262185		ENSG00000272842		ENSG00000230438		ENSG00000236305
				ENSG00000272732		ENSG00000267510		ENSG00000273449		ENSG00000275441
				ENSG00000258768		ENSG00000267546		ENSG00000267107		ENSG00000261762
				ENSG00000258048		ENSG00000275888		ENSG00000274213		ENSG00000257621
				ENSG00000260086		ENSG00000251307		ENSG00000237491		ENSG00000273486
				ENSG00000265692		ENSG00000232811		ENSG00000261889		ENSG00000281501
				ENSG00000185904		ENSG00000263400		ENSG00000273038		ENSG00000272288
				ENSG00000272444		ENSG00000197670		ENSG00000272142		ENSG00000272599
				ENSG00000213888		ENSG00000274767		ENSG00000245571		ENSG00000276259
				ENSG00000272374		ENSG00000235865		ENSG00000226266		ENSG00000238045
				ENSG00000273305		ENSG00000272182		ENSG00000224429		ENSG00000271936
				ENSG00000274363		ENSG00000259354		ENSG00000270659		ENSG00000281207
				ENSG00000255458		ENSG00000232725		ENSG00000271869		ENSG00000231312
				ENSG00000232412		ENSG00000258168		ENSG00000272711		ENSG00000272821
				ENSG00000231010		ENSG00000251179		ENSG00000237248		ENSG00000225963
				ENSG00000272989		ENSG00000203280		ENSG00000272205		ENSG00000274653
				ENSG00000271978		ENSG00000272195		ENSG00000175170		ENSG00000260339
				ENSG00000234492		ENSG00000269890		ENSG00000153363		ENSG00000197989
				ENSG00000272264		ENSG00000267280		ENSG00000198468		ENSG00000231305
				ENSG00000267034		ENSG00000264269		ENSG00000272906		ENSG00000275807
				ENSG00000240875		ENSG00000204620		ENSG00000234129		ENSG00000248008
				ENSG00000272463		ENSG00000249825		ENSG00000225783		ENSG00000259768
				ENSG00000260743		ENSG00000224186		ENSG00000257354		ENSG00000259583
				ENSG00000275580		ENSG00000265148		ENSG00000232956		ENSG00000270084
				ENSG00000236081		ENSG00000250073		ENSG00000228106		ENSG00000234678
				ENSG00000281406		ENSG00000276571		ENSG00000264112		ENSG00000233818
				ENSG00000262772		ENSG00000281333		ENSG00000222041		ENSG00000214708
				ENSG00000270091		ENSG00000234753		ENSG00000267940		ENSG00000240889
				ENSG00000254343		ENSG00000245275		ENSG00000198221		ENSG00000234171
				ENSG00000228817		ENSG00000227908		ENSG00000273084		ENSG00000245105
				ENSG00000271862		ENSG00000231105		ENSG00000262468		ENSG00000281103
				ENSG00000267397		ENSG00000218018		ENSG00000266490		ENSG00000273179
				ENSG00000240219		ENSG00000272540		ENSG00000273456		ENSG00000186615
				ENSG00000234665		ENSG00000235795		ENSG00000257698		ENSG00000272750
				ENSG00000236499		ENSG00000227719		ENSG00000273218		ENSG00000227199
				ENSG00000268568		ENSG00000263531		ENSG00000267321		ENSG00000278390
				ENSG00000273004		ENSG00000235280		ENSG00000238113		ENSG00000277959
				ENSG00000266835		ENSG00000227375		ENSG00000270210		ENSG00000228393
				ENSG00000224023		ENSG00000253438		ENSG00000275632		ENSG00000259065
				ENSG00000272301		ENSG00000259343		ENSG00000274712		ENSG00000223797
				ENSG00000229660		ENSG00000236723		ENSG00000232677		ENSG00000260005
				ENSG00000231028		ENSG00000238123		ENSG00000272902		ENSG00000262692
				ENSG00000281189		ENSG00000271828		ENSG00000197182		ENSG00000259877
				ENSG00000265478		ENSG00000237125		ENSG00000272341		ENSG00000279159
				ENSG00000181798		ENSG00000254860		ENSG00000183250		ENSG00000231154
				ENSG00000236008		ENSG00000256116		ENSG00000245556		ENSG00000261189
				ENSG00000272849		ENSG00000224358		ENSG00000259321		ENSG00000175147
				ENSG00000273001		ENSG00000264548		ENSG00000236255		ENSG00000231609
				ENSG00000239332		ENSG00000269559		ENSG00000259153		ENSG00000231607
				ENSG00000274414		ENSG00000267219		ENSG00000237989		ENSG00000261360
				ENSG00000259070		ENSG00000270681		ENSG00000224843		ENSG00000250132
				ENSG00000281383		ENSG00000248323		ENSG00000212694		ENSG00000272529
				ENSG00000225793		ENSG00000236266		ENSG00000236871		ENSG00000233554
				ENSG00000274220		ENSG00000275055		ENSG00000261888		ENSG00000267390
				ENSG00000258526		ENSG00000224292		ENSG00000245937		ENSG00000242861
				ENSG00000234690		ENSG00000250397		ENSG00000175611		ENSG00000180539
				ENSG00000267152		ENSG00000197099		ENSG00000227486		ENSG00000273137
				ENSG00000276445		ENSG00000233175		ENSG00000258301		ENSG00000205913
				ENSG00000275759		ENSG00000232788		ENSG00000261542		ENSG00000262001
				ENSG00000180066		ENSG00000238279		ENSG00000196741		ENSG00000261737
				ENSG00000270265		ENSG00000259663		ENSG00000260588		ENSG00000247853
				ENSG00000261586		ENSG00000233912		ENSG00000223891		ENSG00000273619
				ENSG00000272369		ENSG00000251364		ENSG00000255571		ENSG00000268006
				ENSG00000152931		ENSG00000272498		ENSG00000234390		ENSG00000236859
				ENSG00000262585		ENSG00000254165		ENSG00000254615		ENSG00000255517
				ENSG00000269974		ENSG00000235236		ENSG00000203999		ENSG00000231889
				ENSG00000250081		ENSG00000269427		ENSG00000248489		ENSG00000231770
				ENSG00000251611		ENSG00000254911		ENSG00000204261		ENSG00000225265
				ENSG00000214900		ENSG00000233799		ENSG00000188511		ENSG00000253106
				ENSG00000263280		ENSG00000259251		ENSG00000226051		ENSG00000251034
				ENSG00000249574		ENSG00000259407		ENSG00000254973		ENSG00000272405
				ENSG00000228340		ENSG00000269194		ENSG00000267364		ENSG00000249087
				ENSG00000273428		ENSG00000272910		ENSG00000272933		ENSG00000260267
				ENSG00000238039		ENSG00000254718		ENSG00000255455		ENSG00000272767
				ENSG00000203684		ENSG00000269534		ENSG00000230487		ENSG00000228343
				ENSG00000272763		ENSG00000273474		ENSG00000275479		ENSG00000278709
				ENSG00000262686		ENSG00000258545		ENSG00000246526		ENSG00000224165
				ENSG00000225684		ENSG00000267571		ENSG00000272512		ENSG00000277182
				ENSG00000235888		ENSG00000234949		ENSG00000256073		ENSG00000216895
				ENSG00000267530		ENSG00000271964		ENSG00000214293		ENSG00000276952
				ENSG00000272128		ENSG00000259342		ENSG00000273366		ENSG00000272173
				ENSG00000272361		ENSG00000270953		ENSG00000272667		ENSG00000213904
				ENSG00000270164		ENSG00000227256		ENSG00000275765		ENSG00000205559
				ENSG00000269489		ENSG00000248445		ENSG00000225518		ENSG00000279080
				ENSG00000237476		ENSG00000260742		ENSG00000197180		ENSG00000270362
				ENSG00000272343		ENSG00000226496		ENSG00000269399		ENSG00000185065
				ENSG00000273113		ENSG00000259488		ENSG00000272567		ENSG00000233654
				ENSG00000270562		ENSG00000276131		ENSG00000273356		ENSG00000267342
				ENSG00000228906		ENSG00000263080		ENSG00000268836		ENSG00000273891
				ENSG00000254290		ENSG00000235033		ENSG00000271614		ENSG00000214432
				ENSG00000247157		ENSG00000228661		ENSG00000224687		ENSG00000230177
				ENSG00000225194		ENSG00000260329		ENSG00000225077		ENSG00000246763
				ENSG00000261618		ENSG00000224897		ENSG00000267898		ENSG00000247708
				ENSG00000223823		ENSG00000263345		ENSG00000235609		ENSG00000267858
				ENSG00000260179		ENSG00000235092		ENSG00000244625		ENSG00000203362
				ENSG00000259439		ENSG00000248559		ENSG00000280303		ENSG00000233184
				ENSG00000263893		ENSG00000235989		ENSG00000272744		ENSG00000260630
				ENSG00000275294		ENSG00000280927		ENSG00000245149		ENSG00000261373
				ENSG00000250986		ENSG00000272717		ENSG00000251161		ENSG00000272269
				ENSG00000270147		ENSG00000265511		ENSG00000242086		ENSG00000229847
				ENSG00000278238		ENSG00000230074		ENSG00000260077		ENSG00000254614
				ENSG00000269038		ENSG00000231969		ENSG00000280798		ENSG00000241764
				ENSG00000275322		ENSG00000261668		ENSG00000249846		ENSG00000273599
				ENSG00000274372		ENSG00000281358		ENSG00000276529		ENSG00000247950
				ENSG00000261187		ENSG00000265415		ENSG00000205181		ENSG00000228192
				ENSG00000270177		ENSG00000280109		ENSG00000273117		ENSG00000215022
				ENSG00000258498		ENSG00000223393		ENSG00000270127		ENSG00000235381
				ENSG00000271327		ENSG00000236432		ENSG00000272449		ENSG00000228288
				ENSG00000277232		ENSG00000250131		ENSG00000245060		ENSG00000224189
				ENSG00000223695		ENSG00000272979		ENSG00000172965		ENSG00000245552
				ENSG00000248636		ENSG00000275371		ENSG00000257086		ENSG00000214106
				ENSG00000269246		ENSG00000253854		ENSG00000188185		ENSG00000223697
				ENSG00000196366		ENSG00000250764		ENSG00000229807		ENSG00000270175
				ENSG00000278743		ENSG00000223461		ENSG00000226067		ENSG00000224424
				ENSG00000197332		ENSG00000180139		ENSG00000281332		ENSG00000241990
				ENSG00000247363		ENSG00000247809		ENSG00000274922		ENSG00000260924
				ENSG00000274215		ENSG00000262147		ENSG00000265743		ENSG00000225855
				ENSG00000251396		ENSG00000275476		ENSG00000273162		ENSG00000261604
				ENSG00000272221		ENSG00000255026		ENSG00000179523		ENSG00000272990
				ENSG00000272140		ENSG00000249592		ENSG00000226137		ENSG00000247287
				ENSG00000267123		ENSG00000263826		ENSG00000255874		ENSG00000280832
				ENSG00000272829		ENSG00000271228		ENSG00000260032		ENSG00000247498
				ENSG00000247317		ENSG00000244161		ENSG00000272666		ENSG00000227782
				ENSG00000257135		ENSG00000273240		ENSG00000230590		ENSG00000272721
				ENSG00000272459		ENSG00000232065		ENSG00000272523		ENSG00000234028
				ENSG00000272690		ENSG00000277383		ENSG00000261455		ENSG00000232807
				ENSG00000270964		ENSG00000266903		ENSG00000275764		ENSG00000232093
				ENSG00000271815		ENSG00000272631		ENSG00000272440		ENSG00000272078
				ENSG00000276136		ENSG00000273212		ENSG00000267939		ENSG00000265749
				ENSG00000228140		ENSG00000265778		ENSG00000270195		ENSG00000258940
				ENSG00000224307		ENSG00000227218		ENSG00000226328		ENSG00000234771
				ENSG00000237877		ENSG00000196951		ENSG00000230844		ENSG00000260018
				ENSG00000180712		ENSG00000232445		ENSG00000272630		ENSG00000246308
				ENSG00000237523		ENSG00000280758		ENSG00000245694		ENSG00000255145
				ENSG00000258534		ENSG00000226179		ENSG00000261087		ENSG00000233621
				ENSG00000271926		ENSG00000248664		ENSG00000255135		ENSG00000258457
				ENSG00000272432		ENSG00000226803		ENSG00000233901		ENSG00000267121
				ENSG00000263884		ENSG00000240288		ENSG00000271855		ENSG00000255468
				ENSG00000260317		ENSG00000225891		ENSG00000186594		ENSG00000273680
				ENSG00000267834		ENSG00000254109		ENSG00000264575		ENSG00000257497
				ENSG00000227740		ENSG00000236935		ENSG00000266402		ENSG00000237950
				ENSG00000175773		ENSG00000272223		ENSG00000274173		ENSG00000239911
				ENSG00000175772		ENSG00000268218		ENSG00000268912		ENSG00000272696
				ENSG00000250790		ENSG00000260647		ENSG00000271780		ENSG00000258655
				ENSG00000270977		ENSG00000204758		ENSG00000251136		ENSG00000273188
				ENSG00000273473		ENSG00000267470		ENSG00000227533		ENSG00000260942
				ENSG00000277767		ENSG00000240211		ENSG00000230658		ENSG00000237015
				ENSG00000267272		ENSG00000268069		ENSG00000260274		ENSG00000261428
				ENSG00000278546		ENSG00000248890		ENSG00000259959		ENSG00000261286
				ENSG00000272953		ENSG00000235958		ENSG00000261068		ENSG00000272501
				ENSG00000269892		ENSG00000272502		ENSG00000272644		ENSG00000232160
				ENSG00000267454		ENSG00000276250		ENSG00000227477		ENSG00000233230
				ENSG00000269486		ENSG00000256802		ENSG00000272316		ENSG00000186056
						ENSG00000274315		ENSG00000271420		ENSG00000267169
						ENSG00000261416		ENSG00000236682		ENSG00000272172
						ENSG00000249572		ENSG00000277511		ENSG00000272606
						ENSG00000261335		ENSG00000223749		ENSG00000273466
						ENSG00000279110		ENSG00000277476		ENSG00000203739
						ENSG00000233250		ENSG00000263753		ENSG00000268996
						ENSG00000257681		ENSG00000237753		ENSG00000258634
						ENSG00000234393		ENSG00000267416		ENSG00000229951
						ENSG00000235078		ENSG00000271009		ENSG00000215458
						ENSG00000260583		ENSG00000224397		ENSG00000182873
						ENSG00000263069		ENSG00000166770		ENSG00000277715
						ENSG00000258302		ENSG00000245317		ENSG00000229043
						ENSG00000266921		ENSG00000244459		ENSG00000271976
						ENSG00000276449		ENSG00000268205		ENSG00000235560
						ENSG00000232874		ENSG00000256433		ENSG00000272807
						ENSG00000218537		ENSG00000257261		ENSG00000260083
						ENSG00000235831		ENSG00000273329		ENSG00000236618
						ENSG00000231731		ENSG00000278385		ENSG00000215068
						ENSG00000271659		ENSG00000249096		ENSG00000241769
						ENSG00000269054		ENSG00000182165		ENSG00000261971
						ENSG00000270571		ENSG00000277938		ENSG00000255224
						ENSG00000272017		ENSG00000230454		ENSG00000240291
						ENSG00000167912		ENSG00000214049		ENSG00000249898
						ENSG00000224093		ENSG00000228878		ENSG00000261801
						ENSG00000258017		ENSG00000261326		ENSG00000255857
						ENSG00000276116		ENSG00000273230		ENSG00000249673
						ENSG00000225889		ENSG00000260136		ENSG00000253320
						ENSG00000267282		ENSG00000259448		ENSG00000228606
						ENSG00000230325		ENSG00000236204		ENSG00000268001
						ENSG00000261366		ENSG00000234883		ENSG00000260121
						ENSG00000228748		ENSG00000260260		ENSG00000246889
						ENSG00000232712		ENSG00000260563		ENSG00000272155
						ENSG00000267213		ENSG00000225470		ENSG00000232995
						ENSG00000267344		ENSG00000272382		ENSG00000265399
						ENSG00000227695		ENSG00000249859		ENSG00000261437
						ENSG00000270760		ENSG00000275198		ENSG00000237399
						ENSG00000272170		ENSG00000270069		ENSG00000271870
						ENSG00000272402		ENSG00000242282		ENSG00000272356
						ENSG00000276523		ENSG00000274265		ENSG00000249042
						ENSG00000236519		ENSG00000267475		ENSG00000226200
						ENSG00000268584		ENSG00000267100		ENSG00000272345
						ENSG00000260022		ENSG00000260517		ENSG00000215067
						ENSG00000245146		ENSG00000272716		ENSG00000272189
						ENSG00000234263		ENSG00000280206		ENSG00000268030
						ENSG00000262823		ENSG00000232748		ENSG00000258471
						ENSG00000271730		ENSG00000276791		ENSG00000271133
						ENSG00000272701		ENSG00000258701		ENSG00000228506
						ENSG00000255320		ENSG00000276814		ENSG00000226688
						ENSG00000243766		ENSG00000232453		ENSG00000257815
						ENSG00000229931		ENSG00000247982		ENSG00000269680
						ENSG00000235530		ENSG00000244041		ENSG00000261840
						ENSG00000268049		ENSG00000250786		ENSG00000255153
						ENSG00000240591		ENSG00000227630		ENSG00000261798
						ENSG00000273733		ENSG00000277782		ENSG00000267348
						ENSG00000254604		ENSG00000262089		ENSG00000269910
						ENSG00000267769		ENSG00000272455		ENSG00000273249
						ENSG00000223813		ENSG00000245532		ENSG00000267751
						ENSG00000271366		ENSG00000225975		ENSG00000227252
						ENSG00000198711		ENSG00000278765		ENSG00000260992
						ENSG00000245248		ENSG00000260101		ENSG00000263335
						ENSG00000256751		ENSG00000274460		ENSG00000234072
						ENSG00000272656		ENSG00000269439		ENSG00000240137
						ENSG00000274751		ENSG00000232098		ENSG00000253716
						ENSG00000270871		ENSG00000260025		ENSG00000230630
						ENSG00000237773		ENSG00000197813		ENSG00000246982
						ENSG00000267128		ENSG00000260257		ENSG00000230185
						ENSG00000204584		ENSG00000215241		ENSG00000224152
						ENSG00000266916		ENSG00000272338		ENSG00000267493
						ENSG00000250988		ENSG00000267838		ENSG00000224043
						ENSG00000259736		ENSG00000272040		ENSG00000227848
						ENSG00000246477		ENSG00000273270		ENSG00000254501
						ENSG00000235513		ENSG00000260193		ENSG00000229334
						ENSG00000238260		ENSG00000272462		ENSG00000196810
						ENSG00000275532		ENSG00000272370		ENSG00000255031
						ENSG00000272148		ENSG00000260219		ENSG00000273783
						ENSG00000275413		ENSG00000272447		ENSG00000231064
						ENSG00000231119		ENSG00000268713		ENSG00000274425
								ENSG00000272144		ENSG00000179743
								ENSG00000275180		ENSG00000265688
								ENSG00000203711		ENSG00000246090
								ENSG00000272129		ENSG00000245281
								ENSG00000272853		ENSG00000269982
								ENSG00000266258		ENSG00000259940
								ENSG00000170161		ENSG00000225313
								ENSG00000236914		ENSG00000237976
								ENSG00000232645		ENSG00000233461
								ENSG00000270673		ENSG00000271781
								ENSG00000268601		ENSG00000272183
								ENSG00000273355		ENSG00000276148
								ENSG00000254531		ENSG00000249602
								ENSG00000273759		ENSG00000260806
								ENSG00000248508		ENSG00000228624
								ENSG00000250903		ENSG00000224660
								ENSG00000272092		ENSG00000247572
								ENSG00000273061		ENSG00000250222
								ENSG00000272081		ENSG00000273729
								ENSG00000223764		ENSG00000247828
								ENSG00000204588		ENSG00000255062
								ENSG00000266904		ENSG00000246334
								ENSG00000273014		ENSG00000269386
								ENSG00000278389		ENSG00000256967
								ENSG00000223546		ENSG00000245025
								ENSG00000247400		ENSG00000266053
								ENSG00000278916		ENSG00000248932
								ENSG00000274828		ENSG00000235978
								ENSG00000251442		ENSG00000280213
								ENSG00000268573		ENSG00000259826
								ENSG00000235823		ENSG00000267365
								ENSG00000247516		ENSG00000273080
								ENSG00000272112		ENSG00000223478
								ENSG00000255198		ENSG00000116883
								ENSG00000246898		ENSG00000255389
								ENSG00000272931		ENSG00000228084
								ENSG00000281404		ENSG00000246859
								ENSG00000271843		ENSG00000271797
								ENSG00000271882		ENSG00000267480
								ENSG00000274191		ENSG00000235706
								ENSG00000272871		ENSG00000257596
								ENSG00000253669		ENSG00000231663
								ENSG00000231595		ENSG00000231908
								ENSG00000248161		ENSG00000272368
								ENSG00000261423		ENSG00000267082
								ENSG00000272141		ENSG00000213742
								ENSG00000266088		ENSG00000227959
								ENSG00000226180		ENSG00000246695
								ENSG00000273702		ENSG00000247796
								ENSG00000278175		ENSG00000254815
								ENSG00000274561		ENSG00000228801
								ENSG00000248866		ENSG00000266469
								ENSG00000270761		ENSG00000267040
										ENSG00000253982
										ENSG00000254389
										ENSG00000273387
										ENSG00000260236
										ENSG00000203392
										ENSG00000261351
										ENSG00000257303
										ENSG00000265206
										ENSG00000260000
										ENSG00000267296
										ENSG00000235703
										ENSG00000233016
										ENSG00000271858
										ENSG00000265666
										ENSG00000233429
										ENSG00000275202
										ENSG00000233223
										ENSG00000263843
										ENSG00000273373
										ENSG00000273026
										ENSG00000230513
										ENSG00000249637
										ENSG00000247934
										ENSG00000253210
										ENSG00000235027
										ENSG00000278330
										ENSG00000257702
										ENSG00000237149
										ENSG00000260285
										ENSG00000245213
										ENSG00000231365
										ENSG00000251143
										ENSG00000223960
										ENSG00000273391
										ENSG00000231890
										ENSG00000225733
										ENSG00000270605
										ENSG00000251602
										ENSG00000269161
										ENSG00000273382
										ENSG00000236017
										ENSG00000224086
										ENSG00000261460
										ENSG00000270194
										ENSG00000235016
										ENSG00000204934
										ENSG00000278341
										ENSG00000246366
										ENSG00000228436
										ENSG00000274383
										ENSG00000247271
										ENSG00000244701
										ENSG00000237298
										ENSG00000237436
										ENSG00000236810
										ENSG00000165511
										ENSG00000203706
										ENSG00000271754
										ENSG00000247081
										ENSG00000203497
										ENSG00000257337
										ENSG00000228701
										ENSG00000225032
										ENSG00000238197
										ENSG00000269176
										ENSG00000267049
										ENSG00000272030
										ENSG00000250999
										ENSG00000235897
										ENSG00000259250
										ENSG00000253552
										ENSG00000260577
										ENSG00000258920
										ENSG00000253559
										ENSG00000234494
										ENSG00000162913
										ENSG00000239415
										ENSG00000268364
										ENSG00000272918
										ENSG00000229127
										ENSG00000228544
										ENSG00000273271
										ENSG00000234614
										ENSG00000278831
										ENSG00000277449
										ENSG00000247092
										ENSG00000240498
										ENSG00000229539
										ENSG00000237499
										ENSG00000227896
										ENSG00000257605
										ENSG00000260552
										ENSG00000260273
										ENSG00000214770
										ENSG00000240990
										ENSG00000228775
										ENSG00000273314
										ENSG00000258738
										ENSG00000267270
										ENSG00000278834
										ENSG00000227354
										ENSG00000268061
										ENSG00000247240
										ENSG00000231074
										ENSG00000260793
										ENSG00000272841
										ENSG00000255337
										ENSG00000267532
										ENSG00000234160
										ENSG00000234636
										ENSG00000248092
										ENSG00000261488
										ENSG00000248019
										ENSG00000272831
										ENSG00000258365
										ENSG00000267787
										ENSG00000271380
										ENSG00000244055
										ENSG00000225177
										ENSG00000214353
										ENSG00000257433
										ENSG00000253636
										ENSG00000256940
										ENSG00000273183
										ENSG00000229589
										ENSG00000228395
										ENSG00000245904
										ENSG00000259291
										ENSG00000223799
										ENSG00000260196
										ENSG00000226471
										ENSG00000226696
										ENSG00000246089
										ENSG00000271971
										ENSG00000275234
										ENSG00000237036
										ENSG00000235919
										ENSG00000227398
										ENSG00000184441
										ENSG00000273253
										ENSG00000262049
										ENSG00000267288
										ENSG00000272009
										ENSG00000270696
										ENSG00000267278
										ENSG00000237187
										ENSG00000232600
										ENSG00000246273
										ENSG00000258727
										ENSG00000276718
										ENSG00000246560
										ENSG00000229666
										ENSG00000246877
										ENSG00000177410
										ENSG00000234694
										ENSG00000270021
										ENSG00000237126
										ENSG00000243155
										ENSG00000270959
										ENSG00000272604
										ENSG00000236144
										ENSG00000254635
										ENSG00000261118
										ENSG00000236778
										ENSG00000265458
										ENSG00000227963
										ENSG00000267322
										ENSG00000266947
										ENSG00000226332
										ENSG00000271122
										ENSG00000232907
										ENSG00000224536
										ENSG00000231871
										ENSG00000237512
										ENSG00000231113
										ENSG00000249249
										ENSG00000270504
										ENSG00000236199
										ENSG00000277879
										ENSG00000237101
										ENSG00000245573
										ENSG00000267317
										ENSG00000236200
										ENSG00000260708
										ENSG00000237686
										ENSG00000225361
										ENSG00000280693
										ENSG00000272758
										ENSG00000228274
										ENSG00000262580
										ENSG00000229124
										ENSG00000259775
										ENSG00000273226
										ENSG00000237017
										ENSG00000244151
										ENSG00000225762
										ENSG00000239636
										ENSG00000260495
										ENSG00000232671
										ENSG00000230337
										ENSG00000263823
										ENSG00000272836
										ENSG00000246263
										ENSG00000206417
										ENSG00000267395
										ENSG00000238164
										ENSG00000235501
										ENSG00000248049
										ENSG00000184068
										ENSG00000228242
										ENSG00000246174
										ENSG00000224596
										ENSG00000260276
										ENSG00000205885
										ENSG00000272008
										ENSG00000237188
										ENSG00000255139
										ENSG00000248367
										ENSG00000264107
										ENSG00000232640
										ENSG00000234869
										ENSG00000272986
										ENSG00000264859
										ENSG00000273064
										ENSG00000225484
										ENSG00000261188
										ENSG00000227039
										ENSG00000233527
										ENSG00000244513
										ENSG00000229619
										ENSG00000247679
										ENSG00000263327
										ENSG00000262050
										ENSG00000204380
										ENSG00000272941
										ENSG00000259891
										ENSG00000260852
										ENSG00000233695
										ENSG00000266983
										ENSG00000246451
										ENSG00000239569
										ENSG00000230091
										ENSG00000215424
										ENSG00000273058
										ENSG00000276166
										ENSG00000272145
										ENSG00000276900
										ENSG00000267519
										ENSG00000236498
										ENSG00000253200
										ENSG00000275719
										ENSG00000258056
										ENSG00000270820
										ENSG00000277728
										ENSG00000272476
										ENSG00000236137
										ENSG00000267064
										ENSG00000273447
										ENSG00000268403
